# Supplementary material
Source: PubMed Central journal article supplement (PMC3674092)
Supplement: cc-12-1279-s01.pdf [file cc-12-1279-s01.pdf]

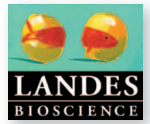

## **Supplemental Material to:**

**Xinyue Zhang, Yunlong He, Kyoung-Hwa Lee, Wendy Dubois, Ziqing Li, Xiaolin Wu, Alexander Kovalchuk, Weimin Zhang and Jing Huang**

**Rap2b, a novel p53 target, regulates p53-mediated pro-survival function**

**2013; 12(8)**

**<http://dx.doi.org/10.4161/cc.24364>**

**<http://www.landesbioscience.com/journals/cc/article/24364>**

## **Rap2b, a novel p53 target, regulates p53-mediated pro-survival function**

Xinyue Zhang, Yunlong He, Kyoung-Hwa Lee, Wendy Dubois, Ziqing Li, Xiaolin Wu,

Alexander Kovalchuk, Weimin Zhang, Jing Huang

### **Supplementary Figure and Table captions**

**Figure S1. Direct targets of p53 in MEF and mES cells.** (A) Analyzing p53 direct targets in MEF and mES cells separately. (B) Table to summarize the p53-repressed and p53-activated genes in p53 direct targets from MEF, mES cells and both (Common).

**Figure S2. Amino acid sequence alignment of Rap2b proteins from a variety of species.**

**Figure S3. Rap2b is induced by p53 in a wild range of mouse and human cells.**

The protein levels of Rap2b, Cdkn1a and p53 induction were measured in NIH3T3 (A), MCF7 (B) and IMR90 (C) cells treated with adriamycin for various times as indicated. (D) H1299 cells inducibly expressing p53 were used to measure the induction of Rap2b, Cdkn1a and p53 after the addition of doxycycline.

**Figure S4. Knockdown of Rap2b increases apoptosis and decreases G2 arrest in**

### **HCT116 cells upon adriamycin treatment.**

Quantified data of cell cycle and apoptosis analysis of HCT116, p53<sup>+/+</sup> and p53<sup>-/-</sup> cells with or without Rap2b knockdown

Left, analysis of sub-G1 phase (apoptotic cell population) in HCT116 cells with Rap2b knockdown upon Adr treatment. Right, analysis of G2 phase cell population in Rap2b knockdown HCT116 cells upon Adr treatment. Shown are mean $\pm$ SEMs, n> or =3, \*\*, p<0.01.

### **Figure S5. Over-expression of Rap2b does not significantly change cell cycle distribution of HCT116 cells in the absence and presence of adriamycin.**

Shown are quantified data of cell cycle and apoptosis analysis of HCT116, p53<sup>+/+</sup> and p53<sup>-/-</sup> cells with or without Rap2b over-expression.

(A) Cell cycle distribution of p53<sup>+/+</sup> HCT116 cells-Luc and with Rap2b over-expression untreated or treated with adriamycin for 0, 1, 2 and 3 days.

(B) Cell cycle distribution of p53<sup>-/-</sup> HCT116 cells-Luc and with Rap2b over-expression untreated or treated with adriamycin for 0, 1, 2 and 3 days. Shown are mean $\pm$ SEMs.

**Figure S6. Rap2b is over-expressed in many types of tumors.** Fold induction of Rap2b in a variety of tumors versus normal controls. Data was obtained from Oncomine. OE, overexpression; UE, under expression. Total number of datasets was listed below the heatmap.

**Figure S7. Anchorage-independent colony formation assay to assess the transformation activity of H-Ras(V12) and Rap2b.**

NIH3T3 cells were transduced with lentivirus expressing luciferase, H-Ras(V12) or mouse Rap2b. Formed colony numbers were calculated for various time as indicated.

Results are displayed as mean  $\pm$  SEM, n=4. \* p<0.05; \*\* p<0.01.

**Table S1. List of common genes whose expression is changed in a p53-dependent manner upon adriamycin treatment.**

**Table S2. List of MEF-specific genes whose expression is changed in a p53-dependent manner upon adriamycin treatment.**

**Table S3. List of mES-specific genes whose expression is changed in a p53-dependent manner upon adriamycin treatment.**

**Table S4. Lists of common, MEF-specific, and mES-specific p53 bound genes.**

**Table S5. Primers used in this study.**

**Supplementary Data statement**

Supplementary Data are available at NAR Online: Supplementary Tables 1–4, Supplementary Figures 1–6.

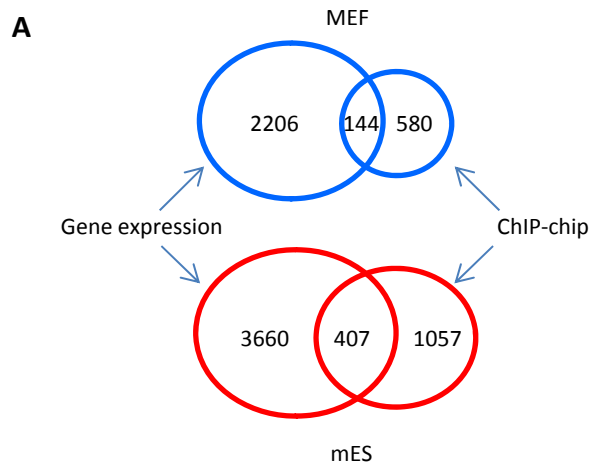

**B**

|                                 | MEF | mES | Common |
|---------------------------------|-----|-----|--------|
| <b>Total direct p53 targets</b> | 144 | 407 | 75     |
| <b>p53-activated genes</b>      | 137 | 335 | 75     |
| <b>p53-repressed genes</b>      | 7   | 72  | 0      |

Figure S1

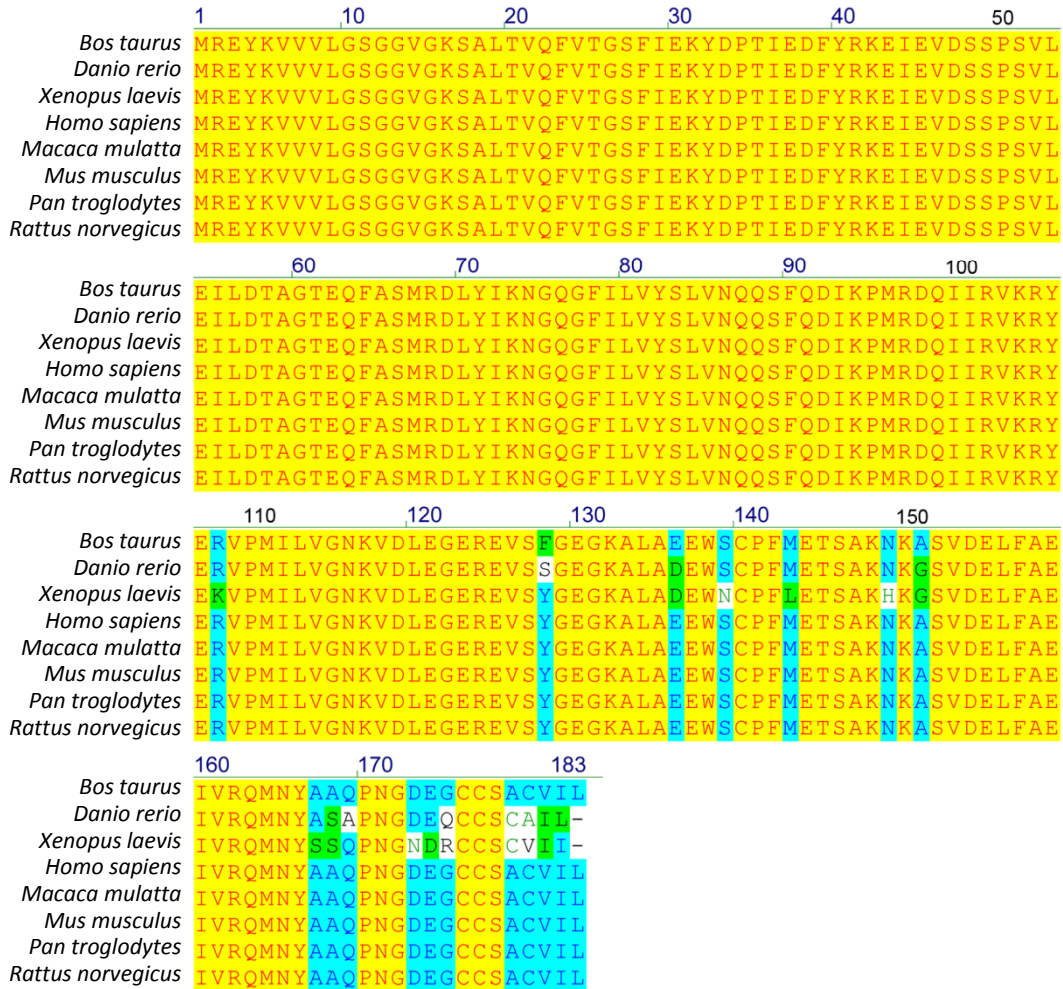

Figure S2

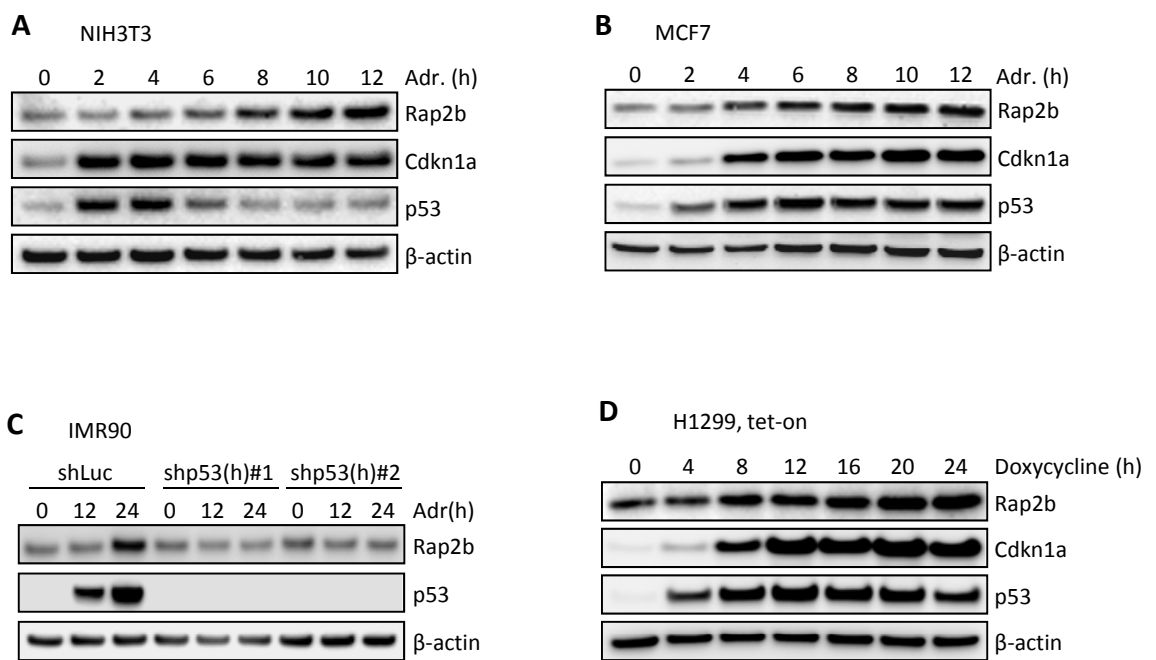

Figure S3

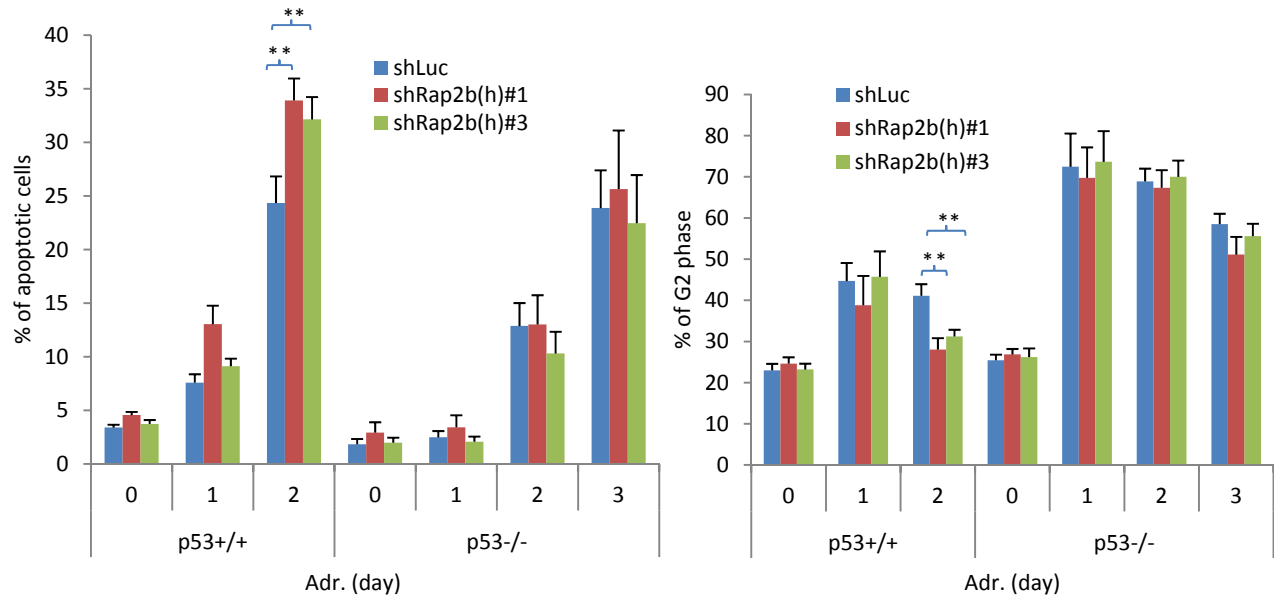

Figure S4



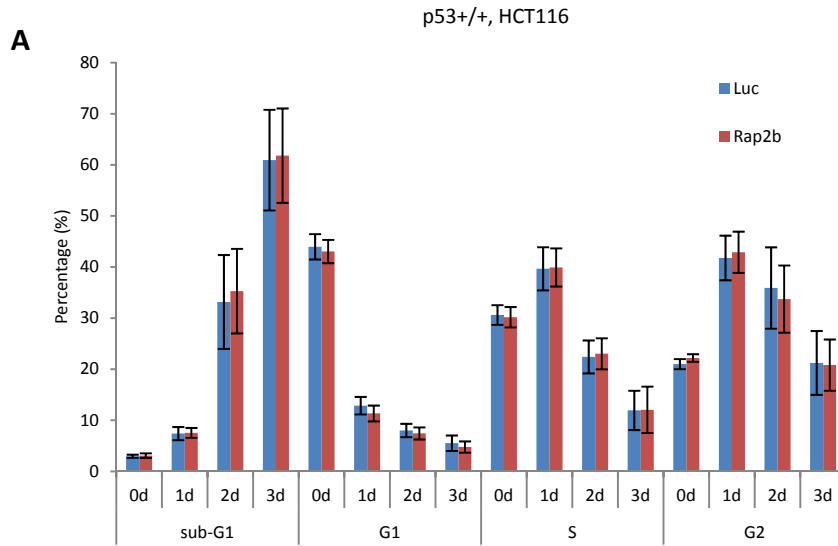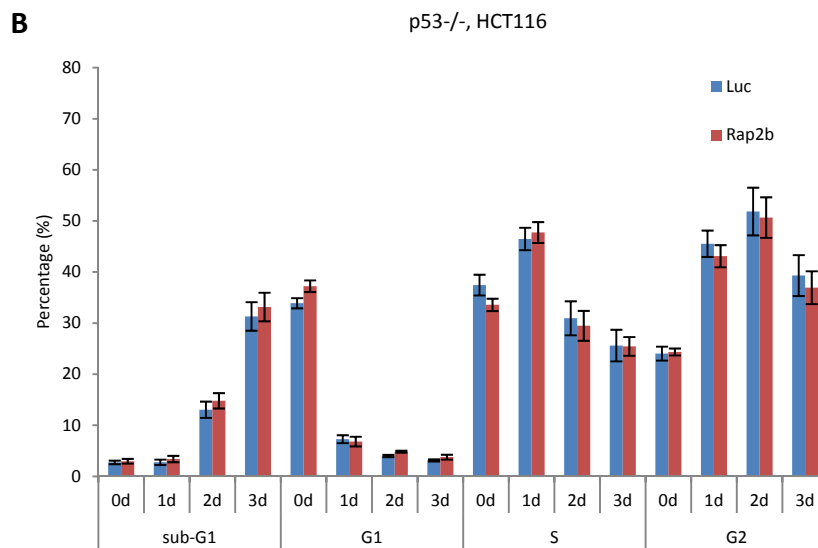

Figure S5

f.c.=1.5

P<0.001

|                      | OE | UE |
|----------------------|----|----|
| Bladder Cancer       | 2  |    |
| Brain and CNS Cancer | 4  | 1  |
| Breast Cancer        | 1  |    |
| Cervical Cancer      | 1  |    |
| Colorectal Cancer    | 1  | 4  |
| Esophageal Cancer    |    |    |
| Gastric Cancer       |    |    |
| Head and Neck Cancer | 1  |    |
| Kidney Cancer        | 9  |    |
| Leukemia             |    | 5  |
| Liver Cancer         | 5  |    |
| Lung Cancer          | 1  |    |
| Lymphoma             |    |    |
| Melanoma             | 2  |    |
| Myeloma              |    |    |
| Other Cancer         | 8  |    |
| Ovarian Cancer       |    |    |
| Pancreatic Cancer    | 3  |    |
| Prostate Cancer      |    |    |
| Sarcoma              | 4  |    |
| Total analyses       | 40 | 10 |

Figure S6

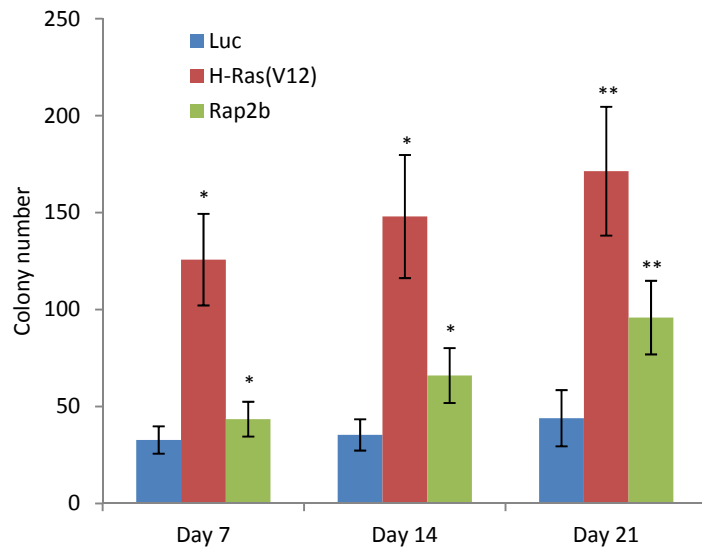

Figure S7

Supplementary Table 1

| Gene Symbol   | RefSeq       | MEF                                |                                  |                                        | mES                                |                                  |                                        |
|---------------|--------------|------------------------------------|----------------------------------|----------------------------------------|------------------------------------|----------------------------------|----------------------------------------|
|               |              | p-value(p53wt, Adr vs. p53wt, Ctr) | Ratio(p53wt, Adr vs. p53wt, Ctr) | Fold-Change(p53wt, Adr vs. p53wt, Ctr) | p-value(p53wt, Adr vs. p53wt, Ctr) | Ratio(p53wt, Adr vs. p53wt, Ctr) | Fold-Change(p53wt, Adr vs. p53wt, Ctr) |
| Hyal1         | NM_008317    | 3.39E-13                           | 8.16606                          | 8.16606                                | 4.79E-09                           | 21.3226                          | 21.3226                                |
| Slc4a11       | NM_001081162 | 1.78E-10                           | 8.24673                          | 8.24673                                | 1.14E-10                           | 19.6389                          | 19.6389                                |
| 1700007K13Rik | BC099566     | 1.18E-09                           | 4.70858                          | 4.70858                                | 1.71E-10                           | 17.8578                          | 17.8578                                |
| Fas           | NM_007987    | 7.18E-10                           | 7.95768                          | 7.95768                                | 3.50E-08                           | 12.2755                          | 12.2755                                |
| Plek2         | NM_013738    | 1.84E-08                           | 5.92222                          | 5.92222                                | 8.64E-07                           | 10.3995                          | 10.3995                                |
| Prrg4         | NM_178695    | 6.47E-10                           | 2.5568                           | 2.5568                                 | 5.75E-06                           | 10.3925                          | 10.3925                                |
| Tbc1d8        | NM_018775    | 1.30E-10                           | 5.10325                          | 5.10325                                | 1.37E-10                           | 10.3915                          | 10.3915                                |
| Fam196a       | NM_001143802 | 2.72E-10                           | 5.77295                          | 5.77295                                | 4.31E-11                           | 10.1                             | 10.1                                   |
| Thap6         | NR_028429    | 0.000111264                        | 1.76164                          | 1.76164                                | 2.35E-09                           | 9.5275                           | 9.5275                                 |
| Fam122b       | NM_001166365 | 9.60E-09                           | 2.80887                          | 2.80887                                | 3.53E-09                           | 9.30824                          | 9.30824                                |
| Alox5         | NM_009662    | 5.77E-14                           | 14.2813                          | 14.2813                                | 9.41E-08                           | 8.97642                          | 8.97642                                |
| Arap2         | NM_178407    | 1.00E-08                           | 5.00311                          | 5.00311                                | 9.31E-06                           | 8.85238                          | 8.85238                                |
| Kcnj4         | NM_008427    | 1.68E-08                           | 4.04626                          | 4.04626                                | 5.07E-08                           | 8.85069                          | 8.85069                                |
| St14          | NM_011176    | 1.83E-07                           | 2.35989                          | 2.35989                                | 4.20E-09                           | 8.80943                          | 8.80943                                |
| Tmc7          | NM_172476    | 1.71E-11                           | 4.20537                          | 4.20537                                | 2.94E-10                           | 8.65319                          | 8.65319                                |
| Lpin1         | NM_015763    | 7.30E-10                           | 2.91849                          | 2.91849                                | 2.86E-08                           | 8.64492                          | 8.64492                                |
| Notch3        | NM_008716    | 5.25E-10                           | 3.69949                          | 3.69949                                | 1.28E-08                           | 8.17664                          | 8.17664                                |
| Tap1          | NM_013683    | 6.55E-11                           | 10.3823                          | 10.3823                                | 8.41E-09                           | 8.09922                          | 8.09922                                |
| Ttll1         | NM_178869    | 4.20E-10                           | 5.50803                          | 5.50803                                | 2.50E-07                           | 7.80379                          | 7.80379                                |
| Nat6          | NM_019750    | 2.13E-11                           | 7.52109                          | 7.52109                                | 2.65E-09                           | 7.44052                          | 7.44052                                |
| Dgka          | NM_016811    | 9.63E-08                           | 2.25269                          | 2.25269                                | 4.82E-09                           | 7.14783                          | 7.14783                                |
| Acad11        | NM_175324    | 1.47E-09                           | 2.84699                          | 2.84699                                | 1.77E-07                           | 6.95626                          | 6.95626                                |
| Ddit4l        | NM_030143    | 1.02E-09                           | 5.71727                          | 5.71727                                | 3.92E-06                           | 6.86801                          | 6.86801                                |
| Celf5         | NM_176954    | 9.86E-10                           | 4.37769                          | 4.37769                                | 3.64E-08                           | 6.7609                           | 6.7609                                 |
| Perp          | NM_022032    | 7.18E-08                           | 4.22707                          | 4.22707                                | 1.24E-06                           | 6.70023                          | 6.70023                                |
| Arhgap20      | NM_175535    | 6.31E-10                           | 4.16389                          | 4.16389                                | 2.15E-10                           | 6.6181                           | 6.6181                                 |
| Prkaa2        | NM_178143    | 6.70E-05                           | 1.58943                          | 1.58943                                | 3.63E-10                           | 6.56136                          | 6.56136                                |
| Dcxr          | NM_026428    | 9.39E-09                           | 5.11243                          | 5.11243                                | 1.71E-08                           | 6.5348                           | 6.5348                                 |
| Ano3          | NM_001128103 | 4.42E-09                           | 8.36893                          | 8.36893                                | 2.69E-05                           | 6.39744                          | 6.39744                                |
| Rb1           | NM_009029    | 3.32E-08                           | 4.10692                          | 4.10692                                | 8.69E-07                           | 6.37104                          | 6.37104                                |
| Pltp          | NM_011125    | 6.57E-05                           | 1.86555                          | 1.86555                                | 1.07E-06                           | 6.22584                          | 6.22584                                |
| Acer2         | NM_139306    | 7.88E-10                           | 2.74193                          | 2.74193                                | 1.31E-07                           | 6.09969                          | 6.09969                                |
| Ppp2r2c       | NM_172994    | 8.22E-09                           | 4.43422                          | 4.43422                                | 5.51E-09                           | 6.00746                          | 6.00746                                |
| Sncg          | NM_011430    | 2.34E-09                           | 2.86784                          | 2.86784                                | 1.51E-05                           | 5.94123                          | 5.94123                                |
| Iffo1         | NM_178787    | 1.29E-07                           | 3.4812                           | 3.4812                                 | 5.40E-08                           | 5.93086                          | 5.93086                                |
| Mybl1         | NM_008651    | 4.99E-06                           | 2.05643                          | 2.05643                                | 2.68E-08                           | 5.882                            | 5.882                                  |
| BC037703      | NM_172295    | 3.93E-08                           | 2.95006                          | 2.95006                                | 4.65E-07                           | 5.74276                          | 5.74276                                |

|               |              |             |          |          |             |         |         |
|---------------|--------------|-------------|----------|----------|-------------|---------|---------|
| 1110012L19Rik | BC024574     | 3.33E-05    | 2.36373  | 2.36373  | 1.06E-06    | 5.56895 | 5.56895 |
| Slc37a2       | NM_001145960 | 5.04E-09    | 4.33536  | 4.33536  | 1.71E-08    | 5.46981 | 5.46981 |
| Fah           | NM_010176    | 1.06E-08    | 3.5219   | 3.5219   | 1.23E-07    | 5.46683 | 5.46683 |
| Pm20d1        | NM_178079    | 4.95E-12    | 8.66576  | 8.66576  | 2.64E-06    | 5.45763 | 5.45763 |
| Grhl3         | NM_001013756 | 0.000671514 | 1.32332  | 1.32332  | 3.49E-08    | 5.44296 | 5.44296 |
| C230030N03Rik | AK082264     | 2.51E-11    | 7.67369  | 7.67369  | 3.30E-07    | 5.35483 | 5.35483 |
| Angel1        | NM_144524    | 2.16E-05    | 1.70969  | 1.70969  | 3.63E-09    | 5.3286  | 5.3286  |
| Depdc7        | NM_144804    | 1.44E-05    | 2.96161  | 2.96161  | 3.36E-06    | 5.20195 | 5.20195 |
| Ptges         | NM_022415    | 2.93E-06    | 1.81683  | 1.81683  | 4.70E-07    | 5.19707 | 5.19707 |
| Spon2         | NM_133903    | 2.48E-11    | 5.38393  | 5.38393  | 3.90E-05    | 5.1027  | 5.1027  |
| Cyyr1         | NM_144853    | 1.90E-12    | 9.16743  | 9.16743  | 9.81E-07    | 5.01943 | 5.01943 |
| Dapk1         | NM_029653    | 7.63E-08    | 2.11865  | 2.11865  | 2.72E-07    | 5.01472 | 5.01472 |
| Ltb4r2        | NM_020490    | 8.36E-10    | 7.72899  | 7.72899  | 3.78E-06    | 4.96515 | 4.96515 |
| Ncoa1         | NM_010881    | 4.65E-08    | 2.64069  | 2.64069  | 2.07E-08    | 4.86389 | 4.86389 |
| Ctsf          | NM_019861    | 4.52E-06    | 1.75193  | 1.75193  | 4.55E-07    | 4.79069 | 4.79069 |
| Cd55          | NM_010016    | 7.53E-09    | 2.91853  | 2.91853  | 4.89E-06    | 4.7804  | 4.7804  |
| Tex15         | NM_031374    | 1.36E-10    | 3.27137  | 3.27137  | 2.12E-07    | 4.77668 | 4.77668 |
| Igsf9b        | NM_001129787 | 1.94E-07    | 1.80593  | 1.80593  | 3.93E-06    | 4.76913 | 4.76913 |
| Zfp296        | NM_022409    | 8.59E-05    | 0.727836 | -1.37394 | 7.09E-07    | 4.75684 | 4.75684 |
| Acad8         | NM_025862    | 5.39E-05    | 1.63098  | 1.63098  | 4.39E-09    | 4.75633 | 4.75633 |
| Pak6          | NM_001033254 | 3.95E-10    | 3.40275  | 3.40275  | 2.07E-08    | 4.74022 | 4.74022 |
| Mkl1          | NM_029005    | 3.81E-08    | 3.10026  | 3.10026  | 1.92E-06    | 4.72987 | 4.72987 |
| Tmem19        | NM_133683    | 1.73E-08    | 3.75227  | 3.75227  | 2.40E-07    | 4.71657 | 4.71657 |
| Mpp7          | NM_001081287 | 0.000292426 | 1.46317  | 1.46317  | 1.30E-05    | 4.67887 | 4.67887 |
| Trim7         | NM_053166    | 3.23E-09    | 3.65193  | 3.65193  | 9.97E-09    | 4.66585 | 4.66585 |
| Cyfip2        | NM_133769    | 4.73E-06    | 1.60058  | 1.60058  | 1.07E-06    | 4.63706 | 4.63706 |
| Arhgef4       | NM_183019    | 8.51E-12    | 3.83503  | 3.83503  | 2.00E-09    | 4.62283 | 4.62283 |
| Ankk1         | NM_172922    | 4.38E-08    | 2.51808  | 2.51808  | 2.35E-06    | 4.58754 | 4.58754 |
| Itpkb         | NM_001081175 | 5.82E-11    | 3.51399  | 3.51399  | 7.45E-10    | 4.57034 | 4.57034 |
| Lrdd          | NM_022654    | 2.38E-08    | 3.46825  | 3.46825  | 7.45E-08    | 4.51694 | 4.51694 |
| Nlrc5         | NM_001033207 | 8.06E-12    | 20.2209  | 20.2209  | 1.23E-05    | 4.51302 | 4.51302 |
| Gm70          | NM_001163103 | 7.22E-14    | 12.2199  | 12.2199  | 1.57E-06    | 4.51021 | 4.51021 |
| Eda2r         | NM_001161432 | 9.41E-07    | 2.00855  | 2.00855  | 1.26E-06    | 4.50975 | 4.50975 |
| Ppp1r14a      | NM_026731    | 1.00E-07    | 1.84466  | 1.84466  | 4.06E-07    | 4.49791 | 4.49791 |
| Procr         | NM_011171    | 2.43E-05    | 1.54524  | 1.54524  | 1.43E-07    | 4.4979  | 4.4979  |
| Pmaip1        | NM_021451    | 2.87E-10    | 2.52884  | 2.52884  | 0.000308528 | 4.47835 | 4.47835 |
| Trp53inp1     | NM_021897    | 9.41E-09    | 2.29195  | 2.29195  | 4.20E-05    | 4.45135 | 4.45135 |
| Slc16a10      | NM_001114332 | 1.48E-05    | 1.76326  | 1.76326  | 3.36E-08    | 4.42381 | 4.42381 |
| Sh3yl1        | NM_013709    | 6.51E-09    | 3.22322  | 3.22322  | 8.11E-07    | 4.41899 | 4.41899 |
| Alox12        | NM_007440    | 9.07E-06    | 1.97465  | 1.97465  | 1.75E-07    | 4.39377 | 4.39377 |
| Trp53i11      | NM_001025246 | 2.82E-05    | 2.04276  | 2.04276  | 3.59E-08    | 4.37311 | 4.37311 |
| Dcaf4         | NM_001165256 | 1.94E-08    | 2.07582  | 2.07582  | 8.39E-09    | 4.32716 | 4.32716 |
| Btg2          | NM_007570    | 5.54E-08    | 5.64883  | 5.64883  | 2.65E-05    | 4.2745  | 4.2745  |

|               |              |            |         |         |          |         |         |
|---------------|--------------|------------|---------|---------|----------|---------|---------|
| Fgf18         | NM_008005    | 2.33E-06   | 1.93975 | 1.93975 | 1.57E-08 | 4.258   | 4.258   |
| Dram1         | NM_027878    | 2.75E-05   | 1.71393 | 1.71393 | 5.31E-08 | 4.12857 | 4.12857 |
| Phkg2         | NM_026888    | 1.06E-06   | 2.00972 | 2.00972 | 3.91E-07 | 4.12245 | 4.12245 |
| Aldh4a1       | NM_175438    | 1.71E-08   | 3.11383 | 3.11383 | 7.34E-07 | 4.10703 | 4.10703 |
| Apobec1       | NM_031159    | 6.08E-08   | 1.98102 | 1.98102 | 6.23E-06 | 4.07979 | 4.07979 |
| Cdc42bpg      | NM_001033342 | 1.03E-09   | 3.95603 | 3.95603 | 4.54E-07 | 4.07505 | 4.07505 |
| Ltb4r1        | NM_008519    | 1.22E-08   | 6.99106 | 6.99106 | 1.95E-05 | 4.06831 | 4.06831 |
| Cyp2u1        | NM_027816    | 6.86E-07   | 2.44765 | 2.44765 | 1.67E-07 | 4.06043 | 4.06043 |
| Fam46c        | NM_001142952 | 1.65E-06   | 1.47496 | 1.47496 | 1.15E-07 | 3.94509 | 3.94509 |
| Tbc1d2        | NM_198664    | 9.16E-07   | 1.85229 | 1.85229 | 5.21E-07 | 3.94007 | 3.94007 |
| Jag2          | NM_010588    | 2.67E-10   | 4.20175 | 4.20175 | 1.45E-06 | 3.92616 | 3.92616 |
| Mmp15         | NM_008609    | 8.87E-09   | 2.7761  | 2.7761  | 2.44E-08 | 3.92612 | 3.92612 |
| 4930429B21Rik | NR_027966    | 2.82E-06   | 2.06605 | 2.06605 | 1.16E-05 | 3.92247 | 3.92247 |
| Dffb          | NM_007859    | 1.61E-11   | 3.9074  | 3.9074  | 5.19E-08 | 3.89442 | 3.89442 |
| Def6          | NM_027185    | 5.28E-09   | 2.41417 | 2.41417 | 1.71E-07 | 3.83331 | 3.83331 |
| Cybasc3       | NM_201351    | 2.17E-06   | 2.70621 | 2.70621 | 2.75E-09 | 3.82072 | 3.82072 |
| Pqlc3         | NM_172574    | 1.55E-06   | 2.06345 | 2.06345 | 6.75E-07 | 3.8186  | 3.8186  |
| Cercam        | NM_207298    | 2.09E-10   | 4.03305 | 4.03305 | 4.27E-06 | 3.80232 | 3.80232 |
| Man1a         | NM_008548    | 2.88E-06   | 2.14855 | 2.14855 | 2.26E-06 | 3.78921 | 3.78921 |
| Wdr91         | NM_001013366 | 3.89E-07   | 2.76037 | 2.76037 | 3.78E-08 | 3.76076 | 3.76076 |
| G630090E17Rik | NM_001173500 | 8.69E-06   | 2.54859 | 2.54859 | 2.91E-08 | 3.68334 | 3.68334 |
| Syt17         | NM_138649    | 6.39E-09   | 3.28276 | 3.28276 | 1.06E-05 | 3.68098 | 3.68098 |
| Ikbke         | NM_019777    | 1.51E-10   | 2.64594 | 2.64594 | 1.54E-07 | 3.67833 | 3.67833 |
| Fam83h        | NM_134087    | 1.02E-07   | 2.66123 | 2.66123 | 8.12E-06 | 3.63712 | 3.63712 |
| Tnfrsf18      | NM_009400    | 1.28E-08   | 2.20332 | 2.20332 | 1.88E-05 | 3.62559 | 3.62559 |
| BC031353      | NM_001113283 | 6.28E-11   | 4.12929 | 4.12929 | 1.28E-05 | 3.61076 | 3.61076 |
| Mapkbp1       | NM_011941    | 2.14E-10   | 2.50844 | 2.50844 | 3.90E-07 | 3.59783 | 3.59783 |
| Phf8          | NM_001113354 | 3.46E-07   | 1.87312 | 1.87312 | 4.68E-09 | 3.59387 | 3.59387 |
| Asap3         | NM_001008232 | 3.52E-07   | 1.74917 | 1.74917 | 2.27E-08 | 3.56819 | 3.56819 |
| Ehd4          | NM_133838    | 1.44E-08   | 2.43536 | 2.43536 | 7.75E-08 | 3.51666 | 3.51666 |
| Fbxl20        | NM_028149    | 1.04E-06   | 2.21359 | 2.21359 | 3.33E-05 | 3.49043 | 3.49043 |
| Abcg1         | NM_009593    | 3.20E-07   | 2.23956 | 2.23956 | 9.77E-07 | 3.48395 | 3.48395 |
| Mfsd7c        | NM_145447    | 4.07E-09   | 5.30692 | 5.30692 | 1.24E-07 | 3.46418 | 3.46418 |
| Trim11        | NM_053168    | 3.37E-07   | 2.19565 | 2.19565 | 3.07E-08 | 3.45704 | 3.45704 |
| Cited4        | NM_019563    | 0.00019469 | 2.0507  | 2.0507  | 1.26E-07 | 3.442   | 3.442   |
| Acox3         | NM_030721    | 2.07E-08   | 1.97948 | 1.97948 | 3.65E-08 | 3.43463 | 3.43463 |
| Cyp27a1       | NM_024264    | 5.17E-09   | 4.20193 | 4.20193 | 2.22E-07 | 3.42178 | 3.42178 |
| Rbl2          | NM_011250    | 4.87E-10   | 3.86462 | 3.86462 | 1.72E-06 | 3.41772 | 3.41772 |
| Prps2         | NM_026662    | 1.45E-08   | 1.91744 | 1.91744 | 2.73E-08 | 3.41564 | 3.41564 |
| Slc27a3       | NM_011988    | 2.18E-07   | 2.65686 | 2.65686 | 8.15E-06 | 3.41352 | 3.41352 |
| Sec14l5       | NM_001127725 | 4.21E-12   | 7.44582 | 7.44582 | 2.72E-07 | 3.39446 | 3.39446 |
| Ift27         | NM_025931    | 6.48E-08   | 3.45699 | 3.45699 | 7.56E-08 | 3.36518 | 3.36518 |
| Notch1        | NM_008714    | 6.23E-06   | 2.39759 | 2.39759 | 8.41E-07 | 3.34634 | 3.34634 |

|               |              |             |          |          |             |         |         |
|---------------|--------------|-------------|----------|----------|-------------|---------|---------|
| Pde5a         | NM_153422    | 5.19E-06    | 2.21987  | 2.21987  | 4.37E-06    | 3.33317 | 3.33317 |
| Tor3a         | NM_023141    | 1.97E-06    | 0.570673 | -1.75232 | 5.24E-07    | 3.32704 | 3.32704 |
| Wnt9a         | NM_139298    | 3.06E-08    | 2.74898  | 2.74898  | 3.92E-07    | 3.31924 | 3.31924 |
| Zfp385a       | NM_013866    | 7.55E-06    | 1.99898  | 1.99898  | 1.88E-08    | 3.31404 | 3.31404 |
| Slc43a2       | NM_173388    | 7.70E-07    | 1.64482  | 1.64482  | 6.95E-08    | 3.30889 | 3.30889 |
| Mapkapk3      | NM_178907    | 4.89E-07    | 1.90883  | 1.90883  | 7.67E-06    | 3.28709 | 3.28709 |
| Ahnak2        | BC138468     | 1.60E-09    | 4.93583  | 4.93583  | 0.000143034 | 3.28248 | 3.28248 |
| Serpine2      | NM_009255    | 5.07E-10    | 6.10421  | 6.10421  | 8.15E-06    | 3.27697 | 3.27697 |
| Zfp365        | NM_178679    | 2.11E-08    | 3.93057  | 3.93057  | 2.63E-07    | 3.24498 | 3.24498 |
| Ppp1r3d       | NM_001085501 | 9.40E-06    | 1.4965   | 1.4965   | 2.71E-07    | 3.22489 | 3.22489 |
| Nfyb          | NM_010914    | 0.000158601 | 1.31835  | 1.31835  | 2.32E-07    | 3.21726 | 3.21726 |
| Trafd1        | NM_001163470 | 8.43E-09    | 4.77397  | 4.77397  | 6.31E-07    | 3.21558 | 3.21558 |
| Mdm2          | NM_010786    | 1.94E-09    | 3.88597  | 3.88597  | 1.95E-06    | 3.21085 | 3.21085 |
| Fam102a       | NM_153560    | 0.000136103 | 1.59056  | 1.59056  | 2.98E-06    | 3.18992 | 3.18992 |
| Nipal4        | NM_172524    | 3.24E-10    | 6.15462  | 6.15462  | 2.04E-05    | 3.18063 | 3.18063 |
| Zfp654        | NM_028059    | 0.000123329 | 1.84618  | 1.84618  | 1.81E-07    | 3.16055 | 3.16055 |
| Sytl1         | NM_031393    | 7.36E-11    | 4.80341  | 4.80341  | 5.05E-07    | 3.15714 | 3.15714 |
| Cpt1c         | NM_153679    | 1.36E-08    | 3.05595  | 3.05595  | 2.18E-05    | 3.15666 | 3.15666 |
| Tet1          | NM_027384    | 5.58E-06    | 0.718405 | -1.39197 | 1.48E-06    | 3.14334 | 3.14334 |
| 1700003E16Rik | NM_027948    | 1.93E-12    | 4.19004  | 4.19004  | 1.94E-05    | 3.13791 | 3.13791 |
| 8430427H17Rik | NM_001134300 | 0.000110404 | 1.23555  | 1.23555  | 5.76E-07    | 3.13763 | 3.13763 |
| Ddr1          | NM_007584    | 1.43E-08    | 3.4999   | 3.4999   | 5.01E-05    | 3.13231 | 3.13231 |
| Adc           | NM_172875    | 8.98E-09    | 3.8003   | 3.8003   | 3.44E-06    | 3.13052 | 3.13052 |
| Limk2         | NM_010718    | 2.08E-07    | 1.83729  | 1.83729  | 5.75E-09    | 3.12356 | 3.12356 |
| Atp13a2       | NM_029097    | 1.46E-08    | 2.78615  | 2.78615  | 6.55E-10    | 3.11829 | 3.11829 |
| Tcirg1        | NM_016921    | 1.46E-08    | 2.27042  | 2.27042  | 7.91E-09    | 3.10026 | 3.10026 |
| Cdk18         | NM_008795    | 2.99E-07    | 1.75245  | 1.75245  | 0.000207207 | 3.09742 | 3.09742 |
| Crip2         | NM_024223    | 2.75E-10    | 3.18345  | 3.18345  | 1.93E-05    | 3.08037 | 3.08037 |
| Fbxw9         | NM_026791    | 1.29E-07    | 2.32957  | 2.32957  | 3.03E-06    | 3.0749  | 3.0749  |
| Gclc          | NM_010295    | 2.26E-06    | 1.49093  | 1.49093  | 1.40E-06    | 3.07274 | 3.07274 |
| Samd12        | NM_177225    | 5.67E-07    | 2.22826  | 2.22826  | 6.02E-05    | 3.05995 | 3.05995 |
| Ablim1        | NM_178688    | 3.67E-09    | 3.29816  | 3.29816  | 6.89E-05    | 3.04381 | 3.04381 |
| Ppp1r13l      | NM_001010836 | 1.10E-10    | 4.15337  | 4.15337  | 9.13E-06    | 3.04086 | 3.04086 |
| Erc5          | NM_011729    | 2.59E-09    | 4.11555  | 4.11555  | 1.03E-05    | 3.03871 | 3.03871 |
| Rbm38         | NM_019547    | 1.21E-09    | 2.577    | 2.577    | 1.71E-08    | 3.03756 | 3.03756 |
| Vps13c        | NM_177184    | 6.27E-06    | 2.09889  | 2.09889  | 1.10E-06    | 3.03406 | 3.03406 |
| Fuca1         | NM_024243    | 1.64E-06    | 1.81405  | 1.81405  | 4.31E-08    | 3.02196 | 3.02196 |
| Abcb1b        | NM_011075    | 1.01E-08    | 4.07891  | 4.07891  | 1.60E-05    | 3.01257 | 3.01257 |
| Abhd4         | NM_134076    | 2.43E-08    | 2.92901  | 2.92901  | 3.34E-07    | 3.00859 | 3.00859 |
| Dzip1         | NM_025943    | 7.30E-10    | 2.5081   | 2.5081   | 1.32E-05    | 2.99308 | 2.99308 |
| Scn1b         | NM_011322    | 1.49E-08    | 2.91829  | 2.91829  | 2.09E-05    | 2.98926 | 2.98926 |
| Plod2         | NM_001142916 | 3.40E-07    | 2.06507  | 2.06507  | 9.41E-05    | 2.98249 | 2.98249 |
| Ephx1         | NM_010145    | 3.74E-11    | 6.16957  | 6.16957  | 3.29E-05    | 2.98041 | 2.98041 |

|               |              |             |         |         |          |         |         |
|---------------|--------------|-------------|---------|---------|----------|---------|---------|
| 9230110C19Rik | BC115525     | 4.02E-05    | 2.2953  | 2.2953  | 4.44E-05 | 2.97658 | 2.97658 |
| 9030607L17Rik | NM_027829    | 4.33E-07    | 2.08228 | 2.08228 | 2.76E-06 | 2.96833 | 2.96833 |
| Rhod          | NM_007485    | 8.14E-08    | 2.84231 | 2.84231 | 2.33E-06 | 2.96127 | 2.96127 |
| Ulk1          | NM_009469    | 0.000311645 | 1.5221  | 1.5221  | 3.09E-06 | 2.95316 | 2.95316 |
| Polk          | NM_012048    | 6.94E-08    | 2.42784 | 2.42784 | 1.63E-05 | 2.94315 | 2.94315 |
| Pla2g16       | NM_139269    | 0.000798315 | 1.62307 | 1.62307 | 2.81E-07 | 2.92571 | 2.92571 |
| Npr2          | NM_173788    | 2.75E-12    | 4.31419 | 4.31419 | 3.41E-05 | 2.92464 | 2.92464 |
| Sh3bgrl2      | NM_172507    | 2.90E-08    | 2.38621 | 2.38621 | 1.61E-07 | 2.92356 | 2.92356 |
| Rprm          | NM_023396    | 1.64E-05    | 1.75298 | 1.75298 | 6.75E-08 | 2.90893 | 2.90893 |
| Abcd4         | NM_008992    | 2.79E-06    | 1.88031 | 1.88031 | 2.23E-09 | 2.90358 | 2.90358 |
| Adrb2         | NM_007420    | 4.88E-09    | 4.12082 | 4.12082 | 2.87E-06 | 2.90122 | 2.90122 |
| Map3k6        | NM_016693    | 1.17E-09    | 2.8069  | 2.8069  | 7.50E-07 | 2.89804 | 2.89804 |
| Wdr35         | NM_172470    | 8.33E-08    | 3.35904 | 3.35904 | 1.86E-05 | 2.8966  | 2.8966  |
| Slc19a2       | NM_054087    | 7.77E-10    | 2.62518 | 2.62518 | 1.13E-06 | 2.88947 | 2.88947 |
| Ei24          | NM_007915    | 5.74E-05    | 1.54583 | 1.54583 | 3.34E-06 | 2.87618 | 2.87618 |
| Cdkn1a        | NM_007669    | 3.93E-09    | 2.1714  | 2.1714  | 8.46E-05 | 2.87534 | 2.87534 |
| Ecm1          | NM_007899    | 1.13E-07    | 1.91162 | 1.91162 | 4.09E-07 | 2.86904 | 2.86904 |
| Ldlrap1       | NM_145554    | 3.57E-10    | 3.89922 | 3.89922 | 1.56E-06 | 2.85517 | 2.85517 |
| Exoc7         | NM_016857    | 3.89E-08    | 1.9045  | 1.9045  | 1.63E-07 | 2.85402 | 2.85402 |
| Dnajc9        | NM_134081    | 3.32E-07    | 2.4294  | 2.4294  | 6.31E-07 | 2.84516 | 2.84516 |
| Mapre3        | NM_133350    | 2.29E-09    | 4.58741 | 4.58741 | 1.22E-08 | 2.84381 | 2.84381 |
| Fam159b       | NM_029984    | 1.51E-06    | 2.48026 | 2.48026 | 6.99E-05 | 2.8394  | 2.8394  |
| Hpcal1        | NM_016677    | 2.10E-06    | 2.73362 | 2.73362 | 1.17E-06 | 2.82339 | 2.82339 |
| Sgsm2         | NM_197943    | 1.88E-10    | 3.73198 | 3.73198 | 5.63E-06 | 2.82047 | 2.82047 |
| Stim1         | NM_009287    | 3.23E-05    | 1.48433 | 1.48433 | 1.71E-09 | 2.81847 | 2.81847 |
| Ppp2r5d       | NM_009358    | 3.58E-08    | 2.03053 | 2.03053 | 3.99E-08 | 2.79731 | 2.79731 |
| Pmm1          | NM_013872    | 5.78E-10    | 2.00844 | 2.00844 | 6.41E-07 | 2.79549 | 2.79549 |
| Efs           | NM_010112    | 7.90E-07    | 1.76925 | 1.76925 | 3.83E-06 | 2.7927  | 2.7927  |
| Carhsp1       | NM_025821    | 1.02E-07    | 2.41972 | 2.41972 | 1.26E-10 | 2.79234 | 2.79234 |
| Ccbl1         | NM_172404    | 0.000125777 | 1.38017 | 1.38017 | 4.56E-06 | 2.75699 | 2.75699 |
| Tctn1         | NM_001039153 | 7.02E-07    | 2.42538 | 2.42538 | 2.32E-06 | 2.7389  | 2.7389  |
| Mapk9         | NM_001163672 | 0.000463365 | 1.69191 | 1.69191 | 8.38E-07 | 2.73868 | 2.73868 |
| AW555464      | NM_001024602 | 4.10E-12    | 4.10799 | 4.10799 | 1.58E-05 | 2.73444 | 2.73444 |
| Stard5        | NM_023377    | 1.51E-07    | 2.74784 | 2.74784 | 1.28E-06 | 2.73157 | 2.73157 |
| Rnf181        | NM_025607    | 4.54E-06    | 1.46437 | 1.46437 | 1.45E-09 | 2.72582 | 2.72582 |
| 3-三月          | NM_177115    | 3.04E-08    | 1.69737 | 1.69737 | 9.26E-07 | 2.72239 | 2.72239 |
| Ptp4a3        | NM_008975    | 5.79E-09    | 3.19577 | 3.19577 | 2.02E-07 | 2.71711 | 2.71711 |
| Epha2         | NM_010139    | 0.000757829 | 1.60158 | 1.60158 | 4.48E-05 | 2.6921  | 2.6921  |
| D16H22S680E   | NM_138583    | 1.28E-07    | 2.26029 | 2.26029 | 3.70E-06 | 2.69029 | 2.69029 |
| Kif21a        | NM_001109040 | 6.90E-09    | 2.49995 | 2.49995 | 1.07E-05 | 2.68098 | 2.68098 |
| 6530418L21Rik | NM_175398    | 2.62E-08    | 2.43923 | 2.43923 | 2.34E-05 | 2.67262 | 2.67262 |
| Ninj1         | NM_013610    | 3.60E-08    | 2.79075 | 2.79075 | 5.31E-08 | 2.67025 | 2.67025 |
| Ampd2         | NM_028779    | 9.69E-08    | 2.53934 | 2.53934 | 3.31E-08 | 2.66795 | 2.66795 |

|               |                    |             |          |          |             |         |         |
|---------------|--------------------|-------------|----------|----------|-------------|---------|---------|
| Sulf2         | NM_028072          | 7.69E-05    | 1.38979  | 1.38979  | 0.000536283 | 2.66167 | 2.66167 |
| Lrrc3         | NM_145152          | 1.76E-07    | 2.31259  | 2.31259  | 1.09E-06    | 2.6474  | 2.6474  |
| Qpctl         | NM_026111          | 3.39E-07    | 2.10768  | 2.10768  | 3.64E-07    | 2.6415  | 2.6415  |
| Ndrp4         | NM_145602          | 0.000190863 | 1.33903  | 1.33903  | 6.88E-06    | 2.62937 | 2.62937 |
| Slc31a2       | NM_025286          | 0.000868432 | 1.55544  | 1.55544  | 1.41E-05    | 2.61833 | 2.61833 |
| Pcx           | NM_001162946       | 1.72E-07    | 2.19355  | 2.19355  | 2.25E-05    | 2.6141  | 2.6141  |
| Cox6b2        | NM_183405          | 0.000218037 | 1.74961  | 1.74961  | 6.99E-06    | 2.60601 | 2.60601 |
| Tnfrsf10b     | NM_020275          | 5.91E-08    | 1.83455  | 1.83455  | 5.43E-05    | 2.59998 | 2.59998 |
| A130022J15Rik | BC048939           | 4.85E-08    | 3.52587  | 3.52587  | 1.47E-06    | 2.58541 | 2.58541 |
| Upp1          | NM_009477          | 6.10E-07    | 0.524754 | -1.90566 | 5.03E-06    | 2.58374 | 2.58374 |
| Tnfrsf21      | NM_178589          | 2.01E-06    | 0.635403 | -1.5738  | 4.33E-05    | 2.58274 | 2.58274 |
| Ptpn3         | NM_011207          | 0.000804935 | 1.20657  | 1.20657  | 1.04E-05    | 2.58196 | 2.58196 |
| Lrrc57        | NM_001159612       | 8.52E-06    | 2.64702  | 2.64702  | 1.58E-06    | 2.57695 | 2.57695 |
| Klhl26        | NM_178771          | 1.11E-09    | 4.93075  | 4.93075  | 7.18E-07    | 2.57572 | 2.57572 |
| Rbm43         | NM_001141981       | 1.38E-07    | 2.04637  | 2.04637  | 4.36E-08    | 2.57568 | 2.57568 |
| Kank3         | NM_030697          | 1.67E-08    | 1.66623  | 1.66623  | 2.00E-07    | 2.5699  | 2.5699  |
| Tgoln1        | NM_009443          | 1.77E-05    | 1.31326  | 1.31326  | 3.20E-07    | 2.55766 | 2.55766 |
| Gcdh          | NM_008097          | 0.000565957 | 1.46143  | 1.46143  | 2.94E-06    | 2.55489 | 2.55489 |
| Dixdc1        | NM_178118          | 3.55E-05    | 1.5039   | 1.5039   | 1.79E-05    | 2.55379 | 2.55379 |
| Rap2b         | NM_028712          | 2.60E-08    | 3.81949  | 3.81949  | 5.66E-06    | 2.54986 | 2.54986 |
| Fbxw7         | NM_001177773       | 4.17E-08    | 1.94207  | 1.94207  | 2.84E-06    | 2.54968 | 2.54968 |
| Zfp248        | NM_028335          | 6.80E-09    | 3.04982  | 3.04982  | 1.11E-06    | 2.54916 | 2.54916 |
| Slc41a1       | NM_173865          | 7.72E-06    | 0.592636 | -1.68738 | 2.66E-06    | 2.54488 | 2.54488 |
| Mkx           | NM_177595          | 1.75E-06    | 2.48973  | 2.48973  | 0.000101921 | 2.54045 | 2.54045 |
| Fos           | NM_010234          | 2.87E-06    | 2.12316  | 2.12316  | 2.04E-05    | 2.53777 | 2.53777 |
| Ntn1          | NM_008744          | 9.09E-07    | 0.581463 | -1.7198  | 1.87E-06    | 2.53734 | 2.53734 |
| Gpr135        | NM_181752          | 0.000284811 | 1.40412  | 1.40412  | 9.66E-07    | 2.53074 | 2.53074 |
| Slc43a3       | NM_021398          | 1.07E-05    | 2.18237  | 2.18237  | 2.93E-06    | 2.52826 | 2.52826 |
| Mobkl1a       | NM_026735          | 3.44E-06    | 1.44491  | 1.44491  | 1.10E-05    | 2.52633 | 2.52633 |
| Ptprv         | NM_007955          | 3.78E-13    | 5.43871  | 5.43871  | 0.000139132 | 2.5263  | 2.5263  |
| Srr           | NM_013761          | 6.83E-06    | 2.0173   | 2.0173   | 4.49E-05    | 2.52315 | 2.52315 |
| Foxo3         | ENSMUST00000105502 | 3.47E-06    | 1.88774  | 1.88774  | 2.99E-06    | 2.51712 | 2.51712 |
| Fam102b       | NM_001163567       | 3.85E-06    | 1.46882  | 1.46882  | 1.89E-06    | 2.51496 | 2.51496 |
| Lnpep         | NM_172827          | 0.000107653 | 1.78684  | 1.78684  | 9.35E-06    | 2.50485 | 2.50485 |
| Sesn2         | NM_144907          | 6.06E-05    | 1.8948   | 1.8948   | 0.00062784  | 2.50174 | 2.50174 |
| Fam53b        | NM_175268          | 1.39E-05    | 1.94299  | 1.94299  | 7.92E-07    | 2.50098 | 2.50098 |
| Slc2a9        | NM_001102414       | 1.05E-07    | 1.88454  | 1.88454  | 6.19E-06    | 2.49323 | 2.49323 |
| Apaf1         | NM_001042558       | 4.70E-11    | 4.64064  | 4.64064  | 6.05E-08    | 2.49152 | 2.49152 |
| Hmgcl1        | NM_173731          | 2.46E-09    | 4.20162  | 4.20162  | 0.000214865 | 2.49108 | 2.49108 |
| Exoc3l2       | ENSMUST00000011407 | 1.61E-09    | 4.86681  | 4.86681  | 3.73E-06    | 2.48916 | 2.48916 |
| Dusp15        | NM_001159376       | 1.22E-07    | 3.03348  | 3.03348  | 5.09E-06    | 2.48913 | 2.48913 |
| Ckap2         | NM_001004140       | 1.04E-06    | 2.04149  | 2.04149  | 1.22E-07    | 2.48709 | 2.48709 |
| Yipf3         | NM_145353          | 6.29E-08    | 2.42355  | 2.42355  | 5.75E-07    | 2.47247 | 2.47247 |



|               |              |             |          |          |             |         |         |
|---------------|--------------|-------------|----------|----------|-------------|---------|---------|
| Fam43a        | NM_177632    | 4.82E-06    | 1.63106  | 1.63106  | 0.000117749 | 2.46015 | 2.46015 |
| Scn3b         | NM_178227    | 4.97E-13    | 6.68596  | 6.68596  | 1.97E-05    | 2.45734 | 2.45734 |
| Ptpn14        | NM_008976    | 1.38E-09    | 4.17563  | 4.17563  | 0.000142212 | 2.44878 | 2.44878 |
| Prkcd         | NM_011103    | 1.71E-07    | 2.73441  | 2.73441  | 2.16E-05    | 2.44824 | 2.44824 |
| Zfp287        | NM_133208    | 2.23E-08    | 2.43857  | 2.43857  | 1.78E-05    | 2.44624 | 2.44624 |
| Slc35d1       | NM_177732    | 2.11E-07    | 3.1399   | 3.1399   | 1.37E-06    | 2.44198 | 2.44198 |
| Rin2          | NM_028724    | 1.95E-05    | 1.64205  | 1.64205  | 3.96E-05    | 2.43865 | 2.43865 |
| Eng           | NM_001146350 | 2.13E-10    | 3.58438  | 3.58438  | 9.28E-05    | 2.43471 | 2.43471 |
| Lactb         | NM_030717    | 2.70E-07    | 2.60837  | 2.60837  | 1.24E-07    | 2.4135  | 2.4135  |
| Cd80          | NM_009855    | 1.37E-08    | 3.24249  | 3.24249  | 0.000154361 | 2.41135 | 2.41135 |
| Rgs3          | NM_134257    | 2.48E-07    | 2.15831  | 2.15831  | 4.38E-08    | 2.40871 | 2.40871 |
| Tmbim1        | NM_027154    | 1.32E-06    | 3.22946  | 3.22946  | 2.69E-05    | 2.40738 | 2.40738 |
| Flcn          | NM_146018    | 1.39E-09    | 2.81713  | 2.81713  | 2.98E-05    | 2.40164 | 2.40164 |
| Kcna6         | NM_013568    | 7.34E-06    | 1.79497  | 1.79497  | 0.000136998 | 2.40153 | 2.40153 |
| Itpr2         | NM_019923    | 0.000114055 | 1.24307  | 1.24307  | 2.57E-06    | 2.40084 | 2.40084 |
| Pgm2l1        | NM_027629    | 5.29E-05    | 1.53885  | 1.53885  | 1.12E-05    | 2.39725 | 2.39725 |
| Adrb3         | NM_013462    | 2.18E-06    | 1.86845  | 1.86845  | 1.45E-06    | 2.39705 | 2.39705 |
| Tmtc3         | NM_001033332 | 1.34E-09    | 3.09736  | 3.09736  | 7.05E-08    | 2.37772 | 2.37772 |
| Agbl2         | NM_178755    | 2.94E-09    | 2.15409  | 2.15409  | 3.60E-09    | 2.37651 | 2.37651 |
| Ppm1d         | NM_016910    | 5.99E-07    | 2.34556  | 2.34556  | 1.71E-09    | 2.37202 | 2.37202 |
| Ikkip         | NM_026166    | 2.38E-06    | 2.58004  | 2.58004  | 1.85E-07    | 2.37059 | 2.37059 |
| Cmtm5         | NM_026066    | 1.84E-08    | 2.65573  | 2.65573  | 1.29E-06    | 2.36901 | 2.36901 |
| Man2b1        | NM_010764    | 7.18E-10    | 6.65999  | 6.65999  | 5.15E-06    | 2.36517 | 2.36517 |
| Zfp750        | NM_178763    | 1.24E-08    | 8.1009   | 8.1009   | 0.000409549 | 2.35383 | 2.35383 |
| Sarm1         | NM_001168521 | 3.32E-09    | 3.12936  | 3.12936  | 1.16E-05    | 2.34728 | 2.34728 |
| Pard6g        | NM_053117    | 1.37E-07    | 2.39144  | 2.39144  | 5.48E-05    | 2.34316 | 2.34316 |
| Slc2a8        | NM_019488    | 0.000462352 | 1.30615  | 1.30615  | 1.17E-06    | 2.33882 | 2.33882 |
| 6330439K17Rik | NM_172859    | 5.03E-07    | 1.96921  | 1.96921  | 1.40E-07    | 2.33726 | 2.33726 |
| Fam83d        | BC068129     | 9.60E-09    | 2.18455  | 2.18455  | 3.18E-07    | 2.33486 | 2.33486 |
| Klhdc5        | NM_001081237 | 4.80E-08    | 3.04388  | 3.04388  | 1.28E-06    | 2.33328 | 2.33328 |
| Mxd1          | NM_010751    | 8.85E-06    | 1.64776  | 1.64776  | 2.02E-06    | 2.32931 | 2.32931 |
| Fzd10         | NM_175284    | 0.000138497 | 1.47991  | 1.47991  | 0.000563861 | 2.32685 | 2.32685 |
| Slc33a1       | NM_015728    | 1.73E-08    | 3.26852  | 3.26852  | 2.87E-08    | 2.32476 | 2.32476 |
| Arhgap27      | NM_133715    | 6.44E-05    | 1.40023  | 1.40023  | 1.11E-07    | 2.32227 | 2.32227 |
| Dock9         | NM_001081039 | 0.00012438  | 1.51731  | 1.51731  | 1.70E-05    | 2.32028 | 2.32028 |
| Cyp4f16       | NM_024442    | 5.06E-06    | 1.98251  | 1.98251  | 4.21E-06    | 2.31198 | 2.31198 |
| Sult4a1       | NM_013873    | 0.000256015 | 1.5447   | 1.5447   | 5.67E-05    | 2.31175 | 2.31175 |
| Tchp          | NM_029992    | 6.77E-09    | 2.13555  | 2.13555  | 5.01E-08    | 2.31069 | 2.31069 |
| Hsd17b11      | NM_053262    | 6.82E-05    | 0.562689 | -1.77718 | 1.34E-06    | 2.31043 | 2.31043 |
| Cars2         | NM_024248    | 0.000257991 | 1.5286   | 1.5286   | 1.19E-05    | 2.30672 | 2.30672 |
| Serinc5       | NM_172588    | 1.58E-06    | 1.77721  | 1.77721  | 2.27E-05    | 2.30606 | 2.30606 |
| Scube3        | NM_001004366 | 0.00012813  | 1.47553  | 1.47553  | 5.31E-05    | 2.29556 | 2.29556 |
| Aaas          | NM_153416    | 3.88E-07    | 1.76121  | 1.76121  | 7.52E-07    | 2.2939  | 2.2939  |

|               |                    |             |          |          |             |         |         |
|---------------|--------------------|-------------|----------|----------|-------------|---------|---------|
| Sntb2         | NM_009229          | 2.77E-06    | 1.79276  | 1.79276  | 3.37E-07    | 2.28992 | 2.28992 |
| Slc26a2       | NM_007885          | 6.99E-08    | 2.18211  | 2.18211  | 5.03E-06    | 2.2894  | 2.2894  |
| Ptprj         | NM_008982          | 5.28E-07    | 2.45952  | 2.45952  | 0.000374772 | 2.28351 | 2.28351 |
| Mcee          | NM_028626          | 8.23E-05    | 1.68826  | 1.68826  | 2.15E-08    | 2.26828 | 2.26828 |
| D430042O09Rik | BC158019           | 1.03E-06    | 1.56614  | 1.56614  | 9.59E-07    | 2.26508 | 2.26508 |
| Sfn           | NM_018754          | 0.000248278 | 2.09216  | 2.09216  | 0.00043991  | 2.25811 | 2.25811 |
| Ufsp1         | NM_027356          | 2.86E-06    | 1.70714  | 1.70714  | 2.87E-06    | 2.25796 | 2.25796 |
| Cby1          | NM_028634          | 2.01E-08    | 2.25577  | 2.25577  | 2.16E-06    | 2.25605 | 2.25605 |
| Phf20l1       | NM_001081409       | 7.75E-06    | 2.50417  | 2.50417  | 1.32E-07    | 2.25313 | 2.25313 |
| Al504432      | NR_033498          | 1.13E-09    | 2.79457  | 2.79457  | 6.06E-06    | 2.25205 | 2.25205 |
| Tmem41a       | NM_025693          | 3.90E-07    | 1.5528   | 1.5528   | 7.88E-08    | 2.25128 | 2.25128 |
| Gltf          | NM_019821          | 6.54E-06    | 1.90932  | 1.90932  | 2.23E-07    | 2.24741 | 2.24741 |
| Adcy2         | NM_153534          | 1.36E-09    | 3.51797  | 3.51797  | 1.39E-06    | 2.24625 | 2.24625 |
| Bloc1s2       | NM_028607          | 1.13E-06    | 2.8979   | 2.8979   | 1.13E-06    | 2.24401 | 2.24401 |
| Col18a1       | NM_009929          | 0.000268988 | 1.29609  | 1.29609  | 2.30E-05    | 2.24337 | 2.24337 |
| Wrap53        | NM_144824          | 1.26E-07    | 2.51164  | 2.51164  | 4.83E-06    | 2.24217 | 2.24217 |
| Cyp4f39       | NM_177307          | 6.98E-12    | 7.55634  | 7.55634  | 0.000223362 | 2.2419  | 2.2419  |
| Rgnf          | NM_012026          | 5.80E-08    | 2.02156  | 2.02156  | 2.23E-06    | 2.23894 | 2.23894 |
| Cenpt         | NM_177150          | 4.66E-06    | 1.90147  | 1.90147  | 1.37E-05    | 2.23694 | 2.23694 |
| Kif17         | NM_010623          | 3.64E-09    | 3.0303   | 3.0303   | 2.47E-06    | 2.23527 | 2.23527 |
| Pde10a        | NM_011866          | 2.41E-05    | 1.48105  | 1.48105  | 5.43E-06    | 2.23466 | 2.23466 |
| Nkx2-9        | NM_008701          | 3.07E-07    | 3.80419  | 3.80419  | 0.000167525 | 2.23162 | 2.23162 |
| Plau          | NM_008873          | 3.24E-07    | 2.20305  | 2.20305  | 0.000450561 | 2.23141 | 2.23141 |
| Zim1          | NM_011769          | 1.26E-08    | 2.61959  | 2.61959  | 0.000204798 | 2.23078 | 2.23078 |
| Hspa1a        | NM_010479          | 9.49E-08    | 2.00609  | 2.00609  | 1.87E-05    | 2.22583 | 2.22583 |
| Panx1         | NM_019482          | 3.79E-09    | 2.4691   | 2.4691   | 7.74E-05    | 2.2181  | 2.2181  |
| Klhdc7a       | NM_173427          | 0.00029418  | 1.66168  | 1.66168  | 0.00015499  | 2.21788 | 2.21788 |
| Dgkq          | NM_199011          | 2.55E-08    | 2.38662  | 2.38662  | 2.58E-05    | 2.21633 | 2.21633 |
| Rgs12         | NM_173402          | 1.45E-07    | 2.32083  | 2.32083  | 1.35E-05    | 2.2141  | 2.2141  |
| Pvrl1         | NM_021424          | 0.000448373 | 1.36128  | 1.36128  | 1.11E-05    | 2.21169 | 2.21169 |
| Tmem63b       | NM_198167          | 1.89E-08    | 2.15388  | 2.15388  | 0.000101859 | 2.20862 | 2.20862 |
| 4931408A02Rik | AF358257           | 6.74E-05    | 2.59085  | 2.59085  | 1.58E-07    | 2.202   | 2.202   |
| Ccdc90a       | NM_001081059       | 0.000483283 | 1.3294   | 1.3294   | 1.65E-06    | 2.19892 | 2.19892 |
| Dalrd3        | NM_026378          | 8.98E-07    | 1.70181  | 1.70181  | 1.23E-05    | 2.19834 | 2.19834 |
| Lzic          | NM_026963          | 8.78E-06    | 2.50961  | 2.50961  | 7.12E-07    | 2.19609 | 2.19609 |
| Tmem154       | NM_177260          | 0.000321668 | 0.837203 | -1.19445 | 1.40E-05    | 2.1954  | 2.1954  |
| Pomt2         | NM_153415          | 2.41E-09    | 2.17353  | 2.17353  | 3.05E-07    | 2.19351 | 2.19351 |
| Zfp125        | ENSMUST00000079237 | 0.000320066 | 1.66081  | 1.66081  | 0.000143022 | 2.19051 | 2.19051 |
| Arrdc1        | NM_001162485       | 1.37E-07    | 1.85035  | 1.85035  | 3.25E-06    | 2.18738 | 2.18738 |
| Pstpip1       | NM_011193          | 3.24E-08    | 2.26119  | 2.26119  | 2.07E-05    | 2.18571 | 2.18571 |
| Duox1         | NM_001099297       | 2.98E-08    | 2.8712   | 2.8712   | 0.00013876  | 2.1856  | 2.1856  |
| Siva1         | NM_013929          | 0.000216128 | 1.83216  | 1.83216  | 4.78E-07    | 2.18423 | 2.18423 |
| Kbtbd11       | NM_029116          | 5.79E-06    | 2.09031  | 2.09031  | 1.04E-05    | 2.18375 | 2.18375 |

|               |                    |             |         |         |             |         |         |
|---------------|--------------------|-------------|---------|---------|-------------|---------|---------|
| Pid1          | NM_001003948       | 1.49E-07    | 2.34857 | 2.34857 | 6.31E-06    | 2.1654  | 2.1654  |
| Elovl2        | NM_019423          | 4.85E-10    | 5.03663 | 5.03663 | 0.000401362 | 2.16492 | 2.16492 |
| Rab40c        | NM_139154          | 7.42E-08    | 1.67107 | 1.67107 | 1.51E-07    | 2.16039 | 2.16039 |
| Ssbp2         | NM_024272          | 0.000319132 | 1.22662 | 1.22662 | 2.78E-06    | 2.15685 | 2.15685 |
| Ank3          | NM_146005          | 8.98E-08    | 1.72694 | 1.72694 | 5.97E-07    | 2.15393 | 2.15393 |
| Agxt2l2       | NM_028398          | 7.20E-09    | 1.87433 | 1.87433 | 2.00E-05    | 2.14933 | 2.14933 |
| Sh2b3         | NM_008507          | 0.000747    | 1.46654 | 1.46654 | 3.83E-05    | 2.1461  | 2.1461  |
| Gtf3c1        | NM_207239          | 9.74E-08    | 2.7094  | 2.7094  | 2.67E-06    | 2.14445 | 2.14445 |
| Gm9983        | ENSMUST00000069594 | 5.87E-05    | 1.83397 | 1.83397 | 2.67E-07    | 2.14088 | 2.14088 |
| Stk36         | NM_175031          | 8.26E-06    | 1.94286 | 1.94286 | 1.97E-05    | 2.13659 | 2.13659 |
| Atox1         | NM_009720          | 6.82E-05    | 1.71939 | 1.71939 | 2.79E-08    | 2.13283 | 2.13283 |
| Pros1         | NM_011173          | 5.96E-10    | 2.69509 | 2.69509 | 0.000634762 | 2.13148 | 2.13148 |
| C030046E11Rik | NM_001081319       | 5.66E-08    | 1.6745  | 1.6745  | 0.000114477 | 2.12818 | 2.12818 |
| Dopey1        | NM_177208          | 2.08E-05    | 1.84618 | 1.84618 | 1.20E-06    | 2.12151 | 2.12151 |
| Gm9282        | XR_033945          | 1.27E-05    | 1.43125 | 1.43125 | 8.98E-07    | 2.1208  | 2.1208  |
| Laptm4b       | NM_033521          | 4.46E-06    | 1.43735 | 1.43735 | 2.73E-06    | 2.12069 | 2.12069 |
| Wdr8          | NM_021499          | 7.74E-08    | 2.02576 | 2.02576 | 1.01E-08    | 2.11834 | 2.11834 |
| Sepx1         | NM_013759          | 2.52E-06    | 2.14242 | 2.14242 | 5.49E-05    | 2.11232 | 2.11232 |
| Cpne2         | NM_153507          | 9.49E-11    | 4.96075 | 4.96075 | 1.66E-05    | 2.11077 | 2.11077 |
| Cltb          | NM_028870          | 4.54E-06    | 1.83147 | 1.83147 | 2.16E-06    | 2.10404 | 2.10404 |
| Zfp874        | NM_177712          | 0.000542241 | 1.26436 | 1.26436 | 1.13E-07    | 2.0929  | 2.0929  |
| Ktelc1        | NM_172380          | 0.000243232 | 1.19278 | 1.19278 | 3.83E-06    | 2.09232 | 2.09232 |
| Bsc12         | NM_008144          | 1.83E-06    | 2.39681 | 2.39681 | 2.50E-05    | 2.09048 | 2.09048 |
| Serinc3       | NM_012032          | 1.23E-07    | 1.71491 | 1.71491 | 9.77E-07    | 2.08385 | 2.08385 |
| 4933432B09Rik | NM_029407          | 1.11E-08    | 2.22663 | 2.22663 | 3.49E-06    | 2.08296 | 2.08296 |
| Map3k8        | NM_007746          | 1.17E-05    | 1.7987  | 1.7987  | 4.30E-05    | 2.08119 | 2.08119 |
| Adamts7       | NM_001003911       | 2.89E-09    | 4.09092 | 4.09092 | 3.01E-05    | 2.07738 | 2.07738 |
| Pitpnm1       | NM_008851          | 5.99E-06    | 2.03907 | 2.03907 | 0.000132702 | 2.07615 | 2.07615 |
| Ptplb         | NM_023587          | 4.86E-05    | 1.83987 | 1.83987 | 1.79E-06    | 2.06798 | 2.06798 |
| Shisa4        | NM_175259          | 2.27E-12    | 4.76714 | 4.76714 | 5.27E-06    | 2.06468 | 2.06468 |
| Myo6          | NM_001039546       | 0.000500701 | 1.51261 | 1.51261 | 3.90E-05    | 2.06089 | 2.06089 |
| Coro2a        | NM_178893          | 1.87E-09    | 3.85259 | 3.85259 | 2.31E-06    | 2.06011 | 2.06011 |
| Rpusd2        | NM_173450          | 0.000182606 | 1.64473 | 1.64473 | 4.40E-05    | 2.05283 | 2.05283 |
| Mertk         | NM_008587          | 7.48E-07    | 1.93517 | 1.93517 | 4.99E-05    | 2.04586 | 2.04586 |
| Pdgfa         | NM_008808          | 3.49E-05    | 1.46892 | 1.46892 | 3.37E-05    | 2.03853 | 2.03853 |
| Trerf1        | NM_001097623       | 5.47E-05    | 1.63426 | 1.63426 | 2.73E-06    | 2.03047 | 2.03047 |
| Gtse1         | NM_013882          | 4.67E-07    | 1.62187 | 1.62187 | 8.16E-05    | 2.02932 | 2.02932 |
| Dagla         | NM_198114          | 1.62E-09    | 2.25663 | 2.25663 | 3.11E-06    | 2.02513 | 2.02513 |
| Adamtsl4      | NM_144899          | 3.19E-08    | 1.79762 | 1.79762 | 5.37E-05    | 2.0245  | 2.0245  |
| Fam160a2      | NM_199009          | 3.54E-07    | 1.56262 | 1.56262 | 4.81E-09    | 2.02114 | 2.02114 |
| Gpn3          | NM_024216          | 2.25E-06    | 2.47137 | 2.47137 | 0.000106346 | 2.0198  | 2.0198  |
| Acad9         | NM_172678          | 2.84E-08    | 1.97868 | 1.97868 | 9.30E-08    | 2.01565 | 2.01565 |
| Ttll9         | NM_001083618       | 2.18E-09    | 3.18197 | 3.18197 | 2.40E-05    | 2.01189 | 2.01189 |

|          |              |             |          |          |             |         |         |
|----------|--------------|-------------|----------|----------|-------------|---------|---------|
| Mxra7    | NM_026280    | 4.02E-09    | 2.4907   | 2.4907   | 1.08E-05    | 2.00834 | 2.00834 |
| Pdcd11   | NM_011053    | 7.90E-07    | 0.73629  | -1.35816 | 0.000427534 | 2.00487 | 2.00487 |
| Klhl22   | NM_145479    | 3.99E-09    | 2.39158  | 2.39158  | 3.27E-08    | 2.0017  | 2.0017  |
| Tpp1     | NM_009906    | 1.97E-06    | 1.74362  | 1.74362  | 3.64E-05    | 1.99889 | 1.99889 |
| Abcd1    | NM_007435    | 0.000157966 | 1.30062  | 1.30062  | 1.51E-05    | 1.99086 | 1.99086 |
| Fdxr     | NM_007997    | 8.98E-05    | 1.74161  | 1.74161  | 7.84E-06    | 1.99046 | 1.99046 |
| Kctd1    | NM_134112    | 2.11E-08    | 1.82607  | 1.82607  | 0.000171047 | 1.98819 | 1.98819 |
| Lancl1   | NM_021295    | 1.18E-06    | 2.11738  | 2.11738  | 7.57E-06    | 1.9881  | 1.9881  |
| Psrc1    | NM_019976    | 4.08E-08    | 1.84716  | 1.84716  | 0.0005001   | 1.98542 | 1.98542 |
| Scap     | NM_001001144 | 1.84E-13    | 2.87176  | 2.87176  | 4.42E-08    | 1.98357 | 1.98357 |
| Pnp2     | NM_001123371 | 6.64E-05    | 0.667513 | -1.4981  | 1.33E-07    | 1.98102 | 1.98102 |
| Dnajb5   | NM_019874    | 2.09E-05    | 1.78746  | 1.78746  | 0.000171014 | 1.98049 | 1.98049 |
| Chst14   | NM_028117    | 6.18E-06    | 2.27756  | 2.27756  | 6.43E-05    | 1.98012 | 1.98012 |
| Aldh1a3  | NM_053080    | 5.69E-06    | 1.45205  | 1.45205  | 0.00088886  | 1.97981 | 1.97981 |
| Tmem64   | NM_181401    | 0.00027535  | 0.62524  | -1.59939 | 4.84E-07    | 1.97869 | 1.97869 |
| Steap3   | NM_001085409 | 1.07E-05    | 1.67759  | 1.67759  | 0.000234471 | 1.97859 | 1.97859 |
| Mettl6   | NM_025907    | 1.35E-07    | 2.77845  | 2.77845  | 2.20E-05    | 1.97824 | 1.97824 |
| Pnp      | NM_013632    | 8.33E-05    | 0.664849 | -1.5041  | 4.19E-06    | 1.97478 | 1.97478 |
| Arhgef33 | NM_001145452 | 1.17E-12    | 7.49483  | 7.49483  | 0.000280202 | 1.97334 | 1.97334 |
| Cacna1a  | NM_007578    | 5.14E-08    | 1.67112  | 1.67112  | 2.58E-07    | 1.97228 | 1.97228 |
| Tmeff2   | NM_019790    | 4.00E-06    | 1.57849  | 1.57849  | 3.24E-07    | 1.97161 | 1.97161 |
| Tef      | NM_153484    | 1.22E-09    | 2.76914  | 2.76914  | 0.000134219 | 1.97059 | 1.97059 |
| Mgst2    | NM_174995    | 3.17E-08    | 2.94867  | 2.94867  | 0.000959867 | 1.96986 | 1.96986 |
| Agtppbp1 | NM_023328    | 0.000163767 | 1.49749  | 1.49749  | 6.72E-05    | 1.96298 | 1.96298 |
| BC022687 | BC090976     | 1.00E-05    | 1.39513  | 1.39513  | 8.18E-06    | 1.96238 | 1.96238 |
| Il6ra    | NM_010559    | 4.20E-05    | 1.62123  | 1.62123  | 2.00E-06    | 1.95954 | 1.95954 |
| Zfp398   | NM_027477    | 9.16E-05    | 1.3794   | 1.3794   | 1.17E-07    | 1.95479 | 1.95479 |
| Pcyox1   | NM_025823    | 2.91E-07    | 2.291    | 2.291    | 4.05E-07    | 1.94995 | 1.94995 |
| Zcchc6   | NM_153538    | 0.000134435 | 1.70475  | 1.70475  | 9.39E-05    | 1.94763 | 1.94763 |
| Slc38a3  | NM_023805    | 1.01E-09    | 3.82181  | 3.82181  | 0.000352333 | 1.9444  | 1.9444  |
| Abcb1a   | NM_011076    | 0.00057819  | 1.49296  | 1.49296  | 0.000988251 | 1.93753 | 1.93753 |
| Sec22c   | NM_178677    | 2.53E-07    | 2.08447  | 2.08447  | 8.29E-05    | 1.93548 | 1.93548 |
| Eif4e3   | NM_025829    | 4.87E-06    | 1.85118  | 1.85118  | 4.05E-05    | 1.93272 | 1.93272 |
| Brap     | NM_028227    | 4.30E-08    | 1.9407   | 1.9407   | 1.38E-05    | 1.92757 | 1.92757 |
| Sidt2    | NM_172257    | 1.89E-09    | 2.95355  | 2.95355  | 2.17E-05    | 1.91868 | 1.91868 |
| Casp3    | NM_009810    | 6.69E-06    | 1.56933  | 1.56933  | 7.81E-06    | 1.91824 | 1.91824 |
| Slc25a42 | NM_001007570 | 2.44E-08    | 2.45232  | 2.45232  | 1.09E-07    | 1.91482 | 1.91482 |
| Mrs2     | NM_001013389 | 4.61E-05    | 1.594    | 1.594    | 1.04E-07    | 1.91276 | 1.91276 |
| Vcan     | NM_001081249 | 6.70E-06    | 2.63445  | 2.63445  | 0.000219214 | 1.90803 | 1.90803 |
| Btbd19   | NR_024078    | 8.16E-09    | 2.6852   | 2.6852   | 0.000391714 | 1.90605 | 1.90605 |
| St3gal4  | NM_009178    | 9.30E-05    | 1.61083  | 1.61083  | 2.92E-06    | 1.90502 | 1.90502 |
| lppk     | NM_199056    | 7.58E-10    | 1.93725  | 1.93725  | 3.02E-06    | 1.90113 | 1.90113 |
| Zfp251   | NM_001007568 | 2.98E-05    | 1.53339  | 1.53339  | 7.14E-06    | 1.898   | 1.898   |

|               |              |             |         |         |             |         |         |
|---------------|--------------|-------------|---------|---------|-------------|---------|---------|
| Pxn           | NM_011223    | 0.000685668 | 1.29714 | 1.29714 | 8.69E-06    | 1.89249 | 1.89249 |
| Gss           | NM_008180    | 3.46E-05    | 1.47046 | 1.47046 | 8.60E-06    | 1.88908 | 1.88908 |
| Homer3        | NM_001146153 | 6.98E-10    | 1.8288  | 1.8288  | 2.83E-05    | 1.88544 | 1.88544 |
| Pink1         | NM_026880    | 4.71E-05    | 1.51327 | 1.51327 | 1.66E-05    | 1.88027 | 1.88027 |
| Cep250        | NM_008383    | 1.33E-05    | 1.51264 | 1.51264 | 1.12E-05    | 1.87708 | 1.87708 |
| Mxd4          | NM_010753    | 3.30E-07    | 1.97635 | 1.97635 | 0.000177776 | 1.87675 | 1.87675 |
| 4632434I11Rik | NM_001080995 | 2.25E-06    | 1.85116 | 1.85116 | 0.000458075 | 1.8732  | 1.8732  |
| Gria3         | NM_016886    | 3.68E-06    | 2.11298 | 2.11298 | 0.000924277 | 1.86796 | 1.86796 |
| Yeats2        | NM_001145930 | 2.75E-06    | 2.13571 | 2.13571 | 9.11E-05    | 1.86609 | 1.86609 |
| Adra2b        | NM_009633    | 2.09E-06    | 4.96551 | 4.96551 | 4.76E-05    | 1.86128 | 1.86128 |
| Map3k13       | NM_172821    | 5.76E-11    | 3.77343 | 3.77343 | 7.14E-06    | 1.85823 | 1.85823 |
| Dmpk          | NM_032418    | 3.54E-12    | 2.7822  | 2.7822  | 0.000772413 | 1.85782 | 1.85782 |
| Efnb1         | NM_010110    | 0.000316841 | 1.46576 | 1.46576 | 3.12E-06    | 1.8564  | 1.8564  |
| Arl13b        | NM_026577    | 8.15E-06    | 1.55427 | 1.55427 | 2.38E-09    | 1.8553  | 1.8553  |
| Celsr2        | NM_017392    | 1.48E-09    | 2.42219 | 2.42219 | 1.12E-06    | 1.85496 | 1.85496 |
| Coro7         | NM_030205    | 3.00E-08    | 2.39032 | 2.39032 | 6.89E-05    | 1.85386 | 1.85386 |
| Heca          | NM_001033432 | 9.84E-05    | 1.57445 | 1.57445 | 9.94E-06    | 1.85277 | 1.85277 |
| Scarb2        | NM_007644    | 2.43E-06    | 1.86221 | 1.86221 | 2.04E-05    | 1.84957 | 1.84957 |
| 4921517L17Rik | BC140978     | 3.34E-07    | 2.74584 | 2.74584 | 2.65E-06    | 1.84477 | 1.84477 |
| BC046331      | NM_177673    | 5.04E-08    | 1.62497 | 1.62497 | 4.10E-06    | 1.84434 | 1.84434 |
| Fbxo34        | NR_027414    | 2.12E-07    | 1.79283 | 1.79283 | 3.85E-06    | 1.84422 | 1.84422 |
| Slc41a2       | NM_177388    | 8.79E-06    | 1.96466 | 1.96466 | 5.87E-05    | 1.84172 | 1.84172 |
| Itfg3         | NM_207217    | 3.19E-06    | 1.74038 | 1.74038 | 0.000202699 | 1.83992 | 1.83992 |
| Cgref1        | NM_026770    | 5.28E-10    | 3.32124 | 3.32124 | 0.000212276 | 1.83255 | 1.83255 |
| Rnpepl1       | NM_181405    | 9.58E-09    | 2.40857 | 2.40857 | 5.22E-05    | 1.83132 | 1.83132 |
| Rtkn          | NM_133641    | 2.88E-12    | 3.15258 | 3.15258 | 4.04E-05    | 1.83044 | 1.83044 |
| Neu3          | NM_016720    | 1.20E-07    | 3.21761 | 3.21761 | 0.000422057 | 1.82928 | 1.82928 |
| Ctsd          | NM_009983    | 2.67E-08    | 1.7997  | 1.7997  | 3.70E-05    | 1.82626 | 1.82626 |
| Pom121        | NM_148932    | 7.35E-07    | 2.21323 | 2.21323 | 6.58E-05    | 1.826   | 1.826   |
| Atg2b         | NM_029654    | 1.59E-05    | 1.70236 | 1.70236 | 3.51E-07    | 1.81928 | 1.81928 |
| Gstz1         | NM_010363    | 0.000966155 | 1.425   | 1.425   | 2.43E-05    | 1.81859 | 1.81859 |
| Rap2a         | NM_029519    | 3.63E-11    | 2.22048 | 2.22048 | 3.15E-05    | 1.81695 | 1.81695 |
| Rasd1         | NM_009026    | 6.54E-07    | 2.12431 | 2.12431 | 3.34E-05    | 1.81491 | 1.81491 |
| Nme4          | NM_019731    | 0.000103287 | 1.67652 | 1.67652 | 6.87E-06    | 1.81168 | 1.81168 |
| Traf4         | NM_009423    | 3.05E-06    | 1.7254  | 1.7254  | 0.000109604 | 1.80962 | 1.80962 |
| Sp6           | NM_031183    | 5.46E-05    | 1.76925 | 1.76925 | 5.23E-07    | 1.80743 | 1.80743 |
| Tnks2         | NM_001163635 | 1.54E-06    | 1.39876 | 1.39876 | 4.99E-06    | 1.80216 | 1.80216 |
| Itgb4         | NM_001005608 | 9.55E-11    | 3.46708 | 3.46708 | 0.000224147 | 1.79861 | 1.79861 |
| Hmg20b        | NM_010440    | 0.000286687 | 1.22973 | 1.22973 | 0.000256202 | 1.798   | 1.798   |
| B230312A22Rik | BC046771     | 0.000305538 | 1.29355 | 1.29355 | 0.000483986 | 1.79708 | 1.79708 |
| Wwp1          | NM_177327    | 0.00048639  | 1.56355 | 1.56355 | 1.03E-07    | 1.79344 | 1.79344 |
| Slc12a4       | NM_009195    | 7.63E-11    | 2.66474 | 2.66474 | 1.83E-07    | 1.79246 | 1.79246 |
| 1500011H22Rik | BC019498     | 1.51E-08    | 1.92955 | 1.92955 | 6.66E-08    | 1.78297 | 1.78297 |

|               |              |             |         |          |             |         |         |
|---------------|--------------|-------------|---------|----------|-------------|---------|---------|
| Etnk2         | NM_175443    | 1.57E-06    | 1.9574  | 1.9574   | 0.000194938 | 1.78238 | 1.78238 |
| Rab23         | NM_008999    | 4.91E-08    | 3.3106  | 3.3106   | 1.30E-05    | 1.78058 | 1.78058 |
| 2410002I01Rik | NM_183137    | 2.33E-06    | 1.48969 | 1.48969  | 9.41E-08    | 1.77734 | 1.77734 |
| Anks1b        | NM_001128086 | 6.31E-06    | 1.84677 | 1.84677  | 5.62E-05    | 1.77693 | 1.77693 |
| Ahi1          | NM_026203    | 0.000105792 | 1.62745 | 1.62745  | 2.66E-05    | 1.77684 | 1.77684 |
| Slc2a4        | NM_009204    | 2.60E-10    | 2.45402 | 2.45402  | 2.74E-05    | 1.77573 | 1.77573 |
| 2010111I01Rik | NM_028079    | 1.31E-07    | 1.87981 | 1.87981  | 4.26E-06    | 1.77425 | 1.77425 |
| Pear1         | NM_028460    | 4.96E-05    | 1.41207 | 1.41207  | 7.96E-05    | 1.77193 | 1.77193 |
| 1500010J02Rik | NR_026565    | 3.31E-09    | 2.13996 | 2.13996  | 7.38E-06    | 1.77076 | 1.77076 |
| Ptpdc1        | NM_207232    | 1.10E-09    | 2.60323 | 2.60323  | 2.54E-06    | 1.76872 | 1.76872 |
| Stk25         | NM_021537    | 4.91E-08    | 2.17305 | 2.17305  | 6.05E-06    | 1.76575 | 1.76575 |
| Cacna1b       | NM_001042528 | 3.17E-08    | 2.75845 | 2.75845  | 3.44E-05    | 1.76298 | 1.76298 |
| Acs16         | NM_001033598 | 2.23E-06    | 1.43596 | 1.43596  | 1.83E-05    | 1.76046 | 1.76046 |
| Plxnb2        | NM_138749    | 0.000283763 | 1.81755 | 1.81755  | 0.000171457 | 1.75449 | 1.75449 |
| Cytsa         | NM_153406    | 6.56E-08    | 2.02366 | 2.02366  | 1.75E-05    | 1.75326 | 1.75326 |
| Zfpm1         | NM_009569    | 1.06E-06    | 2.38948 | 2.38948  | 2.68E-06    | 1.75301 | 1.75301 |
| Mtif3         | NM_029581    | 8.51E-07    | 1.6995  | 1.6995   | 3.55E-05    | 1.75104 | 1.75104 |
| Sh3glb2       | NM_139302    | 7.63E-07    | 2.27444 | 2.27444  | 2.02E-06    | 1.74829 | 1.74829 |
| Sdc1          | NM_011519    | 8.39E-08    | 1.96888 | 1.96888  | 3.76E-05    | 1.74759 | 1.74759 |
| Ldb1          | NM_010697    | 2.31E-05    | 0.82943 | -1.20565 | 0.000108152 | 1.74633 | 1.74633 |
| Myd88         | NM_010851    | 7.86E-07    | 1.57569 | 1.57569  | 1.41E-07    | 1.74587 | 1.74587 |
| Zcchc24       | NM_001101433 | 1.82E-05    | 1.92569 | 1.92569  | 8.05E-05    | 1.74432 | 1.74432 |
| Baiap2        | NM_130862    | 7.70E-09    | 3.47092 | 3.47092  | 0.000180731 | 1.7439  | 1.7439  |
| 4933426M11Rik | BC040401     | 1.74E-06    | 2.59098 | 2.59098  | 8.60E-05    | 1.74169 | 1.74169 |
| Ppil3         | NM_027351    | 0.000124895 | 1.73979 | 1.73979  | 0.000194384 | 1.73967 | 1.73967 |
| Plekha6       | NM_182930    | 4.15E-10    | 3.76729 | 3.76729  | 7.45E-05    | 1.73826 | 1.73826 |
| Gne           | NM_015828    | 2.92E-11    | 4.45626 | 4.45626  | 0.000348464 | 1.73637 | 1.73637 |
| Tmem127       | NM_175145    | 1.20E-08    | 2.11021 | 2.11021  | 7.68E-05    | 1.73637 | 1.73637 |
| Aqr           | NM_009702    | 1.72E-08    | 1.47387 | 1.47387  | 8.04E-07    | 1.73627 | 1.73627 |
| Irf6          | NM_016851    | 1.86E-06    | 2.38769 | 2.38769  | 0.000130852 | 1.73545 | 1.73545 |
| Triobp        | NM_001039156 | 6.57E-08    | 1.86133 | 1.86133  | 7.68E-06    | 1.73475 | 1.73475 |
| Rnf169        | NM_175388    | 3.71E-10    | 2.43478 | 2.43478  | 0.000656559 | 1.73282 | 1.73282 |
| Tmem229a      | NM_177013    | 1.08E-06    | 1.91236 | 1.91236  | 0.000616255 | 1.73232 | 1.73232 |
| Snai3         | NM_013914    | 6.33E-09    | 3.26818 | 3.26818  | 5.89E-05    | 1.7295  | 1.7295  |
| Hcn2          | NM_008226    | 9.15E-05    | 1.55628 | 1.55628  | 5.37E-05    | 1.72498 | 1.72498 |
| Cast          | NM_009817    | 5.73E-05    | 1.58785 | 1.58785  | 4.11E-07    | 1.72276 | 1.72276 |
| Exoc2         | NM_025588    | 4.49E-06    | 1.74384 | 1.74384  | 0.000474372 | 1.71798 | 1.71798 |
| Arhgap24      | NM_029270    | 0.000586361 | 1.32339 | 1.32339  | 0.000180102 | 1.71733 | 1.71733 |
| 1700081L11Rik | BC054752     | 6.53E-05    | 1.49751 | 1.49751  | 0.000859354 | 1.71511 | 1.71511 |
| Prss53        | NM_001081268 | 1.84E-08    | 3.64737 | 3.64737  | 6.57E-05    | 1.70726 | 1.70726 |
| Artn          | NM_009711    | 7.39E-08    | 2.50047 | 2.50047  | 1.24E-05    | 1.70628 | 1.70628 |
| Sh3bp1        | NM_009164    | 1.48E-06    | 1.71959 | 1.71959  | 0.000103757 | 1.70623 | 1.70623 |
| Ccdc122       | NM_175369    | 4.69E-06    | 2.08922 | 2.08922  | 0.000596352 | 1.70605 | 1.70605 |

|          |                   |             |          |         |             |         |         |
|----------|-------------------|-------------|----------|---------|-------------|---------|---------|
| Tsku     | NM_001168541      | 1.71E-07    | 2.78513  | 2.78513 | 0.000155012 | 1.70597 | 1.70597 |
| Prdm8    | NM_029947         | 0.000406929 | 1.34301  | 1.34301 | 4.54E-06    | 1.70347 | 1.70347 |
| Ak1      | NM_021515         | 2.15E-05    | 1.64151  | 1.64151 | 4.10E-05    | 1.70325 | 1.70325 |
| Chchd7   | NM_181391         | 0.000123314 | 1.72204  | 1.72204 | 9.08E-08    | 1.70046 | 1.70046 |
| Ckmt1    | NM_009897         | 3.93E-10    | 3.32302  | 3.32302 | 0.000658246 | 1.69474 | 1.69474 |
| Ptpre    | NM_011212         | 8.14E-07    | 2.03238  | 2.03238 | 0.000683687 | 1.6942  | 1.6942  |
| B4galnt3 | NM_198884         | 1.14E-06    | 0.729021 | -1.3717 | 2.69E-05    | 1.69379 | 1.69379 |
| Fam124a  | ENSMUST0000039064 | 4.32E-07    | 2.00295  | 2.00295 | 8.47E-05    | 1.69291 | 1.69291 |
| Rad51l3  | NM_011235         | 1.08E-07    | 2.21363  | 2.21363 | 8.12E-05    | 1.68908 | 1.68908 |
| Scarb1   | NM_016741         | 1.82E-06    | 1.37784  | 1.37784 | 3.02E-06    | 1.68772 | 1.68772 |
| Zdhhc1   | NM_175160         | 7.09E-08    | 2.32116  | 2.32116 | 0.000271465 | 1.68723 | 1.68723 |
| Prosc    | NM_054057         | 7.46E-06    | 2.03524  | 2.03524 | 2.49E-06    | 1.68568 | 1.68568 |
| Pafah2   | NM_133880         | 1.25E-07    | 2.47566  | 2.47566 | 0.000250477 | 1.68473 | 1.68473 |
| Ube2o    | NM_173755         | 1.09E-05    | 1.18393  | 1.18393 | 0.000377714 | 1.68412 | 1.68412 |
| Elmo2    | NM_207706         | 3.36E-08    | 1.73256  | 1.73256 | 7.21E-06    | 1.6834  | 1.6834  |
| Top1mt   | NM_028404         | 4.86E-09    | 3.23303  | 3.23303 | 3.23E-05    | 1.68331 | 1.68331 |
| Gusb     | NM_010368         | 3.24E-06    | 1.72048  | 1.72048 | 2.51E-06    | 1.68161 | 1.68161 |
| Ppard    | NM_011145         | 2.27E-10    | 2.60469  | 2.60469 | 5.05E-05    | 1.67608 | 1.67608 |
| Larp1b   | BC100361          | 3.93E-05    | 1.45991  | 1.45991 | 2.86E-06    | 1.67598 | 1.67598 |
| Zxdc     | NM_173002         | 1.52E-08    | 1.86609  | 1.86609 | 1.17E-06    | 1.67245 | 1.67245 |
| Map2k4   | NM_009157         | 1.84E-06    | 1.75131  | 1.75131 | 1.18E-06    | 1.67212 | 1.67212 |
| Abhd14a  | NM_001110271      | 1.87E-05    | 2.03788  | 2.03788 | 2.75E-05    | 1.66982 | 1.66982 |
| Fbrs     | NM_010183         | 5.60E-05    | 1.50504  | 1.50504 | 0.000611267 | 1.66425 | 1.66425 |
| Usp20    | NM_028846         | 5.75E-05    | 1.61769  | 1.61769 | 0.000124025 | 1.661   | 1.661   |
| Fosl1    | NM_010235         | 1.33E-10    | 5.2333   | 5.2333  | 1.74E-05    | 1.66075 | 1.66075 |
| Rcsd1    | NM_178593         | 5.04E-08    | 2.14414  | 2.14414 | 3.81E-05    | 1.66068 | 1.66068 |
| Hras1    | NM_001130444      | 1.17E-06    | 1.3581   | 1.3581  | 7.53E-06    | 1.65819 | 1.65819 |
| Tmem120a | NM_172541         | 8.44E-07    | 2.20768  | 2.20768 | 0.000259634 | 1.65815 | 1.65815 |
| Abhd5    | NM_026179         | 1.13E-10    | 3.11     | 3.11    | 1.45E-05    | 1.65674 | 1.65674 |
| Pam      | NM_013626         | 8.21E-09    | 2.42592  | 2.42592 | 0.000162927 | 1.65387 | 1.65387 |
| Spocd1   | NM_001144949      | 8.70E-06    | 1.43923  | 1.43923 | 9.21E-06    | 1.65268 | 1.65268 |
| Slc35e4  | NM_153142         | 7.29E-08    | 2.2138   | 2.2138  | 2.30E-05    | 1.64182 | 1.64182 |
| Zfyve21  | NM_026752         | 1.25E-06    | 1.63097  | 1.63097 | 2.32E-05    | 1.64172 | 1.64172 |
| Vopp1    | NM_146168         | 1.07E-07    | 2.99488  | 2.99488 | 6.18E-06    | 1.63958 | 1.63958 |
| Adcy5    | NM_001012765      | 8.00E-09    | 2.14107  | 2.14107 | 0.00038531  | 1.63767 | 1.63767 |
| Capg     | NM_007599         | 0.00025734  | 1.95552  | 1.95552 | 0.000205377 | 1.6364  | 1.6364  |
| Sh3rf3   | NM_172788         | 3.48E-08    | 2.55204  | 2.55204 | 5.94E-05    | 1.6355  | 1.6355  |
| Fkbp9    | NM_012056         | 1.88E-06    | 1.69035  | 1.69035 | 9.67E-06    | 1.63477 | 1.63477 |
| Sbk1     | NM_145587         | 3.62E-08    | 1.96346  | 1.96346 | 0.000173818 | 1.63428 | 1.63428 |
| Inpp4a   | NM_030266         | 3.00E-08    | 1.77537  | 1.77537 | 0.000896363 | 1.63307 | 1.63307 |
| Slc29a4  | NM_146257         | 1.39E-07    | 1.91287  | 1.91287 | 6.16E-05    | 1.63244 | 1.63244 |
| Tbcel    | NM_173038         | 3.33E-05    | 1.48829  | 1.48829 | 3.41E-05    | 1.62813 | 1.62813 |
| Reep2    | NM_144865         | 5.80E-06    | 1.75997  | 1.75997 | 2.65E-05    | 1.62315 | 1.62315 |

|               |              |             |          |          |             |         |         |
|---------------|--------------|-------------|----------|----------|-------------|---------|---------|
| Rims1         | NM_053270    | 2.49E-07    | 1.50996  | 1.50996  | 1.03E-05    | 1.62171 | 1.62171 |
| Mtm1          | NM_001164190 | 3.85E-05    | 0.753359 | -1.32739 | 5.62E-05    | 1.61766 | 1.61766 |
| Tmem203       | NM_177344    | 2.65E-05    | 1.47954  | 1.47954  | 2.64E-05    | 1.61735 | 1.61735 |
| Trim3         | NM_018880    | 2.00E-05    | 1.44433  | 1.44433  | 5.66E-05    | 1.61639 | 1.61639 |
| Cad           | NM_023525    | 1.68E-09    | 1.90159  | 1.90159  | 0.000147483 | 1.61512 | 1.61512 |
| Ampd3         | NM_009667    | 3.93E-08    | 2.03426  | 2.03426  | 0.00010107  | 1.6144  | 1.6144  |
| Nbeal2        | NM_183276    | 2.80E-07    | 2.11835  | 2.11835  | 2.75E-05    | 1.60996 | 1.60996 |
| Kifc1         | NM_053173    | 5.08E-08    | 1.71975  | 1.71975  | 9.70E-07    | 1.60885 | 1.60885 |
| Ell           | NM_007924    | 5.96E-06    | 1.75222  | 1.75222  | 2.11E-05    | 1.60724 | 1.60724 |
| Klhl8         | NM_178741    | 4.84E-05    | 1.93165  | 1.93165  | 9.35E-05    | 1.60431 | 1.60431 |
| Sdhaf1        | NM_001033140 | 6.27E-06    | 1.95549  | 1.95549  | 0.000490323 | 1.6029  | 1.6029  |
| Dctn1         | NM_007835    | 1.79E-06    | 1.56792  | 1.56792  | 3.15E-05    | 1.60013 | 1.60013 |
| Vkorc1        | NM_178600    | 1.22E-07    | 2.76161  | 2.76161  | 0.000487872 | 1.5985  | 1.5985  |
| Map4k2        | NM_009006    | 9.92E-05    | 1.57374  | 1.57374  | 3.41E-05    | 1.59795 | 1.59795 |
| Dgkd          | NM_177646    | 1.12E-05    | 1.49134  | 1.49134  | 4.48E-05    | 1.59772 | 1.59772 |
| Nars2         | NM_153591    | 0.000258309 | 1.61589  | 1.61589  | 5.28E-05    | 1.59516 | 1.59516 |
| Dennd5a       | NM_021494    | 3.27E-06    | 1.62908  | 1.62908  | 0.000427778 | 1.59479 | 1.59479 |
| Tmem43        | NM_028766    | 1.91E-09    | 3.54456  | 3.54456  | 7.57E-06    | 1.5947  | 1.5947  |
| Cbs           | NM_144855    | 2.62E-10    | 3.15508  | 3.15508  | 0.000617464 | 1.59411 | 1.59411 |
| Ehd3          | NM_020578    | 9.56E-05    | 1.50284  | 1.50284  | 0.000841233 | 1.59388 | 1.59388 |
| Cd109         | NM_153098    | 6.06E-09    | 7.19416  | 7.19416  | 2.69E-05    | 1.59217 | 1.59217 |
| Elf4          | NM_019680    | 1.58E-05    | 0.575135 | -1.73872 | 0.000895232 | 1.58957 | 1.58957 |
| Osbpl5        | NM_024289    | 5.07E-11    | 3.24312  | 3.24312  | 0.000105133 | 1.58918 | 1.58918 |
| Bbc3          | NM_133234    | 0.000115229 | 1.59048  | 1.59048  | 0.000321607 | 1.5838  | 1.5838  |
| Tsen54        | NM_029557    | 0.00077498  | 1.36837  | 1.36837  | 8.67E-07    | 1.58328 | 1.58328 |
| Bcl9l         | NM_030256    | 4.96E-07    | 1.75022  | 1.75022  | 5.14E-07    | 1.57992 | 1.57992 |
| 4933427D14Rik | BC043106     | 1.28E-06    | 1.79768  | 1.79768  | 2.71E-05    | 1.57535 | 1.57535 |
| Ccng1         | NM_009831    | 1.14E-07    | 1.94433  | 1.94433  | 9.18E-06    | 1.57442 | 1.57442 |
| Btg1          | NM_007569    | 7.12E-07    | 1.87167  | 1.87167  | 0.000132025 | 1.57196 | 1.57196 |
| Cpped1        | NM_146067    | 1.58E-06    | 1.95731  | 1.95731  | 9.59E-05    | 1.56955 | 1.56955 |
| Tyro3         | NM_019392    | 9.32E-07    | 0.508576 | -1.96627 | 2.03E-05    | 1.56859 | 1.56859 |
| Lrrc51        | NM_001162974 | 1.91E-08    | 2.54586  | 2.54586  | 4.07E-05    | 1.56391 | 1.56391 |
| Bat2l         | NM_001159634 | 5.92E-05    | 1.27085  | 1.27085  | 6.50E-06    | 1.56389 | 1.56389 |
| Top3b         | NM_011624    | 0.000255679 | 1.51082  | 1.51082  | 0.00013845  | 1.5629  | 1.5629  |
| Gfer          | NM_023040    | 2.64E-05    | 1.46595  | 1.46595  | 5.96E-05    | 1.55874 | 1.55874 |
| Fam109a       | BC120681     | 0.000360696 | 1.60148  | 1.60148  | 0.000144881 | 1.55797 | 1.55797 |
| Lpin3         | NM_022883    | 4.19E-05    | 1.34212  | 1.34212  | 0.000177902 | 1.55704 | 1.55704 |
| Itm2b         | NM_008410    | 0.000759465 | 1.34172  | 1.34172  | 2.87E-05    | 1.55628 | 1.55628 |
| Fxyd5         | NM_008761    | 8.98E-09    | 3.39939  | 3.39939  | 0.000845576 | 1.55431 | 1.55431 |
| Itm2c         | NM_022417    | 0.000918635 | 1.47626  | 1.47626  | 0.00079453  | 1.55071 | 1.55071 |
| Rap1gap       | NM_001081155 | 3.27E-07    | 1.74677  | 1.74677  | 0.000335737 | 1.5422  | 1.5422  |
| Pla2r1        | NM_008867    | 0.000693947 | 1.27983  | 1.27983  | 4.13E-05    | 1.53987 | 1.53987 |
| Arhgap22      | NM_153800    | 4.15E-08    | 1.66841  | 1.66841  | 0.000233012 | 1.53705 | 1.53705 |



|          |              |             |          |          |             |         |         |
|----------|--------------|-------------|----------|----------|-------------|---------|---------|
| Cdadc1   | NM_001168535 | 0.00015004  | 1.47367  | 1.47367  | 7.57E-05    | 1.53626 | 1.53626 |
| Cpz      | NM_153107    | 1.70E-11    | 9.68553  | 9.68553  | 0.000707857 | 1.53552 | 1.53552 |
| Gm12501  | XR_032348    | 0.000395007 | 1.36296  | 1.36296  | 0.000741462 | 1.53459 | 1.53459 |
| Tnpo2    | NM_145390    | 3.05E-07    | 1.61531  | 1.61531  | 2.43E-05    | 1.52959 | 1.52959 |
| Whrn     | NM_001008791 | 1.73E-08    | 1.75353  | 1.75353  | 4.30E-05    | 1.52905 | 1.52905 |
| Ivd      | NM_019826    | 1.65E-07    | 1.62871  | 1.62871  | 0.000146284 | 1.52718 | 1.52718 |
| Agpat4   | NM_026644    | 4.60E-05    | 1.64678  | 1.64678  | 0.000112    | 1.52525 | 1.52525 |
| Rab37    | NM_021411    | 3.03E-07    | 1.98224  | 1.98224  | 2.95E-05    | 1.51843 | 1.51843 |
| Arfgef2  | NM_001085495 | 2.31E-06    | 1.75938  | 1.75938  | 9.85E-05    | 1.51785 | 1.51785 |
| Slc22a17 | NM_021551    | 3.24E-05    | 1.67866  | 1.67866  | 0.00056646  | 1.51784 | 1.51784 |
| Tnfrsf1a | NM_011609    | 5.99E-06    | 1.68236  | 1.68236  | 5.90E-06    | 1.51556 | 1.51556 |
| Tulp4    | NM_054040    | 1.04E-08    | 4.572    | 4.572    | 8.19E-05    | 1.51319 | 1.51319 |
| Slc4a8   | NM_021530    | 8.88E-12    | 3.53042  | 3.53042  | 0.000218878 | 1.51184 | 1.51184 |
| Gm13949  | X63928       | 4.94E-06    | 1.55492  | 1.55492  | 0.000346977 | 1.51058 | 1.51058 |
| Rxra     | NM_011305    | 2.17E-07    | 1.59781  | 1.59781  | 0.000148657 | 1.51047 | 1.51047 |
| Agpat6   | NM_018743    | 9.98E-05    | 1.28015  | 1.28015  | 1.47E-07    | 1.50957 | 1.50957 |
| Zc3h12a  | NM_153159    | 2.67E-05    | 0.697072 | -1.43457 | 8.95E-05    | 1.50803 | 1.50803 |
| Tram11   | NM_146140    | 2.33E-07    | 1.78866  | 1.78866  | 0.000163219 | 1.50627 | 1.50627 |
| Ddx19b   | NM_172284    | 2.01E-05    | 1.39788  | 1.39788  | 0.000201653 | 1.50321 | 1.50321 |
| Polr1e   | NM_022811    | 6.08E-06    | 1.39084  | 1.39084  | 2.46E-06    | 1.49171 | 1.49171 |
| Eps8l2   | NM_133191    | 5.05E-09    | 1.68825  | 1.68825  | 0.000986283 | 1.48387 | 1.48387 |
| Mlec     | NM_175403    | 1.87E-08    | 2.14382  | 2.14382  | 2.85E-05    | 1.48045 | 1.48045 |
| St3gal2  | NM_009179    | 2.28E-07    | 1.37509  | 1.37509  | 0.000149851 | 1.4803  | 1.4803  |
| Dos      | NM_015761    | 9.71E-08    | 1.66722  | 1.66722  | 0.000135301 | 1.4748  | 1.4748  |
| Rnf14    | NM_020012    | 5.75E-08    | 2.07111  | 2.07111  | 0.000459707 | 1.47344 | 1.47344 |
| Lage3    | NM_025410    | 0.000316147 | 1.50133  | 1.50133  | 8.47E-05    | 1.47231 | 1.47231 |
| Zfp651   | NM_001166644 | 0.000990079 | 1.54333  | 1.54333  | 0.000162734 | 1.47038 | 1.47038 |
| Mgat2    | NM_146035    | 0.000341772 | 1.44659  | 1.44659  | 2.92E-06    | 1.46923 | 1.46923 |
| Neurl1a  | NM_021360    | 1.02E-05    | 1.56315  | 1.56315  | 9.61E-06    | 1.45872 | 1.45872 |
| Zbtb42   | NM_001100460 | 1.57E-06    | 2.12605  | 2.12605  | 0.000294162 | 1.45726 | 1.45726 |
| Shisa5   | NM_025858    | 0.000396386 | 1.23298  | 1.23298  | 2.04E-06    | 1.45684 | 1.45684 |
| Aen      | NM_026531    | 1.34E-06    | 1.49473  | 1.49473  | 4.00E-05    | 1.45389 | 1.45389 |
| Cd81     | NM_133655    | 3.47E-05    | 1.4197   | 1.4197   | 3.22E-05    | 1.45157 | 1.45157 |
| Sash1    | NM_175155    | 1.34E-05    | 1.41545  | 1.41545  | 7.52E-05    | 1.45013 | 1.45013 |
| Pnpla6   | NM_001122818 | 4.74E-05    | 1.29952  | 1.29952  | 3.47E-05    | 1.44779 | 1.44779 |
| Capn10   | NM_011796    | 0.000391031 | 1.48745  | 1.48745  | 0.000138557 | 1.44369 | 1.44369 |
| Myo9b    | NM_001142322 | 1.72E-08    | 2.01801  | 2.01801  | 0.000572867 | 1.44159 | 1.44159 |
| Tmem9b   | NM_020050    | 0.000178164 | 1.44825  | 1.44825  | 1.81E-05    | 1.4367  | 1.4367  |
| Elf1     | NM_007920    | 6.05E-07    | 1.66963  | 1.66963  | 1.93E-05    | 1.43537 | 1.43537 |
| Plekhg6  | NM_198604    | 5.51E-09    | 4.03259  | 4.03259  | 0.00070252  | 1.42849 | 1.42849 |
| Gm1943   | NR_002928    | 2.49E-05    | 1.67306  | 1.67306  | 5.66E-06    | 1.4281  | 1.4281  |
| Map3k9   | NM_001174107 | 5.92E-07    | 2.57636  | 2.57636  | 2.17E-05    | 1.42777 | 1.42777 |
| Itga2b   | NM_010575    | 8.87E-09    | 3.51318  | 3.51318  | 8.30E-05    | 1.42768 | 1.42768 |

|               |              |             |          |          |             |          |          |
|---------------|--------------|-------------|----------|----------|-------------|----------|----------|
| Ccdc17        | NM_001037916 | 5.65E-10    | 2.58884  | 2.58884  | 0.000338051 | 1.42657  | 1.42657  |
| Cbfb          | NM_001161458 | 0.000232866 | 1.27096  | 1.27096  | 1.59E-05    | 1.42509  | 1.42509  |
| Rln1          | NM_011272    | 5.29E-05    | 2.05762  | 2.05762  | 3.41E-05    | 1.42372  | 1.42372  |
| Cpd           | NM_007754    | 1.96E-09    | 2.79322  | 2.79322  | 8.96E-06    | 1.41898  | 1.41898  |
| Agap1         | NM_178119    | 1.71E-09    | 1.95405  | 1.95405  | 0.000374331 | 1.41703  | 1.41703  |
| Gpsm1         | NM_153410    | 1.16E-07    | 1.60602  | 1.60602  | 4.89E-05    | 1.41579  | 1.41579  |
| Matn4         | NM_013592    | 7.46E-07    | 1.79479  | 1.79479  | 8.96E-06    | 1.4151   | 1.4151   |
| Nupl2         | NM_153092    | 3.57E-08    | 1.73442  | 1.73442  | 0.00081343  | 1.40915  | 1.40915  |
| Ubttd1        | NM_145500    | 2.35E-05    | 1.45367  | 1.45367  | 0.000267116 | 1.40363  | 1.40363  |
| Ppm1m         | NM_198931    | 0.000219073 | 0.759009 | -1.31751 | 0.000242729 | 1.40292  | 1.40292  |
| Sh2d3c        | NM_013781    | 7.72E-06    | 1.79474  | 1.79474  | 9.11E-05    | 1.39939  | 1.39939  |
| Rasgef1a      | NM_027526    | 4.85E-06    | 1.69376  | 1.69376  | 3.78E-05    | 1.39785  | 1.39785  |
| Fam162a       | NM_027342    | 0.000232027 | 1.27239  | 1.27239  | 0.000332068 | 1.3912   | 1.3912   |
| Zfp334        | NM_178411    | 0.000117389 | 1.35273  | 1.35273  | 0.000672363 | 1.38914  | 1.38914  |
| Rag1ap1       | NM_009057    | 3.62E-07    | 1.97792  | 1.97792  | 0.00073034  | 1.38864  | 1.38864  |
| Aldh7a1       | NM_001127338 | 8.03E-05    | 1.22722  | 1.22722  | 0.000370338 | 1.3871   | 1.3871   |
| Cryab         | NM_009964    | 1.50E-07    | 2.73577  | 2.73577  | 0.000978083 | 1.38147  | 1.38147  |
| Fbxl3         | NM_015822    | 0.000954839 | 1.3039   | 1.3039   | 1.31E-05    | 1.38066  | 1.38066  |
| Rin1          | NM_145495    | 6.24E-05    | 1.70726  | 1.70726  | 0.000348051 | 1.3765   | 1.3765   |
| Zhx1          | NM_001042438 | 0.000190673 | 1.51082  | 1.51082  | 5.10E-06    | 1.37434  | 1.37434  |
| Arhgef6       | NM_152801    | 0.000260608 | 1.29321  | 1.29321  | 0.000984365 | 1.3512   | 1.3512   |
| Snx29         | NM_028964    | 9.24E-07    | 1.65549  | 1.65549  | 3.19E-05    | 1.32375  | 1.32375  |
| Kif1c         | NM_153103    | 1.50E-06    | 3.11019  | 3.11019  | 0.000902116 | 1.2967   | 1.2967   |
| Rab42         | NM_001081651 | 2.43E-05    | 2.49543  | 2.49543  | 0.000625402 | 1.28898  | 1.28898  |
| Efr3b         | NM_001082483 | 1.57E-09    | 1.91138  | 1.91138  | 4.77E-05    | 1.28007  | 1.28007  |
| Rnf19a        | NM_013923    | 9.67E-05    | 0.649204 | -1.54035 | 2.69E-05    | 1.27852  | 1.27852  |
| Slc25a3       | NM_133668    | 2.58E-05    | 1.27325  | 1.27325  | 0.000309446 | 1.27053  | 1.27053  |
| P2rx6         | NM_011028    | 5.89E-09    | 4.29497  | 4.29497  | 0.000440152 | 1.26551  | 1.26551  |
| Nfxl1         | NM_133921    | 4.23E-08    | 1.78569  | 1.78569  | 6.09E-05    | 1.26063  | 1.26063  |
| Smtnl2        | NM_177776    | 2.12E-08    | 0.561621 | -1.78056 | 9.94E-06    | 1.25757  | 1.25757  |
| Ssbp3         | NM_023672    | 2.35E-05    | 1.44956  | 1.44956  | 0.000154003 | 1.23596  | 1.23596  |
| Lmna          | NM_001002011 | 2.08E-05    | 0.665178 | -1.50336 | 0.000418164 | 1.23102  | 1.23102  |
| Pnpla7        | NM_146251    | 2.87E-10    | 2.15242  | 2.15242  | 0.000464451 | 1.22272  | 1.22272  |
| Dusp7         | NM_153459    | 8.27E-05    | 1.55974  | 1.55974  | 0.000878195 | 1.19552  | 1.19552  |
| Tuba1b        | NM_011654    | 8.66E-07    | 0.892463 | -1.1205  | 0.000454378 | 0.922689 | -1.08379 |
| Tmed2         | NM_019770    | 0.00095423  | 0.746834 | -1.33899 | 4.04E-06    | 0.867185 | -1.15316 |
| Atf6          | NM_001081304 | 9.19E-05    | 0.715312 | -1.39799 | 0.000758415 | 0.856205 | -1.16794 |
| BO20018G12Rik | NM_001039518 | 0.000391787 | 0.853315 | -1.1719  | 0.000856046 | 0.85317  | -1.1721  |
| Dedd          | NM_001128609 | 1.27E-05    | 0.682133 | -1.46599 | 0.000689201 | 0.839626 | -1.19101 |
| Ube2d3        | NM_025356    | 1.99E-07    | 0.7941   | -1.25929 | 8.41E-06    | 0.833978 | -1.19907 |
| Cpsf6         | NM_001013391 | 1.75E-05    | 0.6984   | -1.43185 | 0.000264849 | 0.828118 | -1.20756 |
| Nhp2l1        | NM_011482    | 0.000552335 | 0.817904 | -1.22264 | 0.000408437 | 0.827342 | -1.20869 |
| Eif4a1        | NM_144958    | 0.000220753 | 0.836208 | -1.19587 | 2.62E-05    | 0.820736 | -1.21842 |

|               |              |             |          |          |             |          |          |
|---------------|--------------|-------------|----------|----------|-------------|----------|----------|
| Cul1          | NM_012042    | 1.29E-05    | 0.678483 | -1.47388 | 0.000265311 | 0.816078 | -1.22537 |
| 2810407C02Rik | NM_001040396 | 0.000807584 | 0.676851 | -1.47743 | 5.86E-05    | 0.808416 | -1.23699 |
| Far1          | NM_026143    | 0.000137775 | 0.66857  | -1.49573 | 0.000943915 | 0.802015 | -1.24686 |
| Ccdc21        | NM_144527    | 8.04E-05    | 0.6985   | -1.43164 | 0.000712644 | 0.800989 | -1.24846 |
| Cdc5l         | AK150562     | 0.000271612 | 0.67094  | -1.49045 | 0.000669792 | 0.799698 | -1.25047 |
| Abcg2         | NM_011920    | 0.000225863 | 0.484972 | -2.06198 | 3.70E-05    | 0.79919  | -1.25127 |
| Rpusd1        | NM_028009    | 4.13E-06    | 1.255    | 1.255    | 0.000349218 | 0.796553 | -1.25541 |
| Sumo2         | NM_133354    | 3.68E-06    | 0.799154 | -1.25132 | 0.000855243 | 0.795115 | -1.25768 |
| Enoph1        | NM_026421    | 2.41E-07    | 0.553172 | -1.80776 | 2.63E-05    | 0.793535 | -1.26018 |
| 2410129H14Rik | NM_175245    | 3.98E-07    | 0.645106 | -1.55013 | 0.000582616 | 0.793172 | -1.26076 |
| Xkr5          | NM_176951    | 0.00012203  | 0.660699 | -1.51355 | 0.0007321   | 0.788142 | -1.26881 |
| Tfpt          | NM_023524    | 1.33E-05    | 0.758774 | -1.31791 | 0.000187448 | 0.780735 | -1.28084 |
| Hspbp1        | NM_024172    | 0.000142272 | 0.737657 | -1.35564 | 0.000749138 | 0.778658 | -1.28426 |
| Caprin1       | NM_016739    | 0.000112215 | 0.793582 | -1.26011 | 1.02E-05    | 0.777685 | -1.28587 |
| Hnrnp2        | NM_019868    | 2.64E-06    | 0.634672 | -1.57562 | 5.53E-06    | 0.777385 | -1.28636 |
| Plp2          | NM_019755    | 4.37E-05    | 0.709442 | -1.40956 | 0.000878324 | 0.776318 | -1.28813 |
| Cisd2         | NM_025902    | 0.000664833 | 0.782043 | -1.2787  | 9.17E-05    | 0.775244 | -1.28992 |
| H2afz         | NM_016750    | 2.50E-05    | 0.585217 | -1.70877 | 0.000485497 | 0.771726 | -1.2958  |
| Trip10        | NM_134125    | 1.78E-10    | 0.420759 | -2.37666 | 0.000758658 | 0.770925 | -1.29714 |
| Rlim          | NM_011276    | 8.84E-08    | 0.65873  | -1.51807 | 2.90E-05    | 0.76791  | -1.30224 |
| Sox12         | NM_011438    | 7.72E-05    | 0.642582 | -1.55622 | 0.00024122  | 0.765802 | -1.30582 |
| Jagn1         | NM_026365    | 0.000276617 | 0.712281 | -1.40394 | 5.17E-08    | 0.764041 | -1.30883 |
| Khdrbs1       | NM_011317    | 0.000481362 | 0.68744  | -1.45467 | 1.85E-05    | 0.761802 | -1.31268 |
| Plscr1        | NM_011636    | 4.90E-08    | 0.419682 | -2.38276 | 0.00081539  | 0.759599 | -1.31648 |
| Gnl1          | NM_008136    | 1.01E-06    | 0.572892 | -1.74553 | 4.83E-05    | 0.757985 | -1.31929 |
| Smarce1       | NM_020618    | 3.99E-05    | 0.787559 | -1.26975 | 0.000430205 | 0.756213 | -1.32238 |
| 1700025G04Rik | NM_197990    | 5.54E-06    | 0.62106  | -1.61015 | 0.000137896 | 0.755006 | -1.32449 |
| Basp1         | NM_027395    | 1.01E-08    | 0.492076 | -2.03221 | 8.12E-05    | 0.751409 | -1.33083 |
| Atp2a2        | NR_027838    | 1.20E-06    | 0.615904 | -1.62363 | 1.06E-05    | 0.747351 | -1.33806 |
| Cspp1         | NM_026493    | 6.62E-05    | 0.801502 | -1.24766 | 0.000294099 | 0.747146 | -1.33843 |
| Rmi1          | NM_001168248 | 0.000159497 | 0.642209 | -1.55712 | 5.66E-05    | 0.744055 | -1.34399 |
| Metap1        | NM_175224    | 3.41E-05    | 0.731142 | -1.36772 | 0.000198456 | 0.74348  | -1.34503 |
| Larp4         | NM_001024526 | 0.000161605 | 0.780126 | -1.28184 | 9.82E-05    | 0.740731 | -1.35002 |
| Cnot1         | NM_153164    | 1.07E-05    | 0.757988 | -1.31928 | 0.000123733 | 0.740403 | -1.35062 |
| Pitpnb        | NM_019640    | 7.20E-05    | 0.646653 | -1.54642 | 1.25E-05    | 0.735089 | -1.36038 |
| Hspd1         | NM_010477    | 1.28E-05    | 0.781964 | -1.27883 | 9.51E-05    | 0.73454  | -1.3614  |
| Dhps          | NM_001039514 | 1.17E-05    | 0.68851  | -1.45241 | 0.000755583 | 0.73396  | -1.36247 |
| Rangrf        | NM_021329    | 0.000971409 | 0.658339 | -1.51897 | 0.000109819 | 0.733519 | -1.36329 |
| Rgs19         | NM_026446    | 4.87E-05    | 0.794725 | -1.2583  | 4.24E-05    | 0.732107 | -1.36592 |
| Trim16        | NM_053169    | 0.000140134 | 0.587902 | -1.70096 | 2.57E-05    | 0.730992 | -1.368   |
| Polr2e        | NM_025554    | 3.47E-06    | 0.686026 | -1.45767 | 0.00055698  | 0.72954  | -1.37073 |
| Raf1          | NM_029780    | 5.92E-05    | 0.79776  | -1.25351 | 4.24E-05    | 0.723477 | -1.38221 |
| Trpc2         | NM_011644    | 0.000130501 | 1.48489  | 1.48489  | 3.07E-05    | 0.721097 | -1.38678 |

|          |              |             |          |          |             |          |          |
|----------|--------------|-------------|----------|----------|-------------|----------|----------|
| Rad21    | NM_009009    | 3.81E-07    | 0.658656 | -1.51824 | 0.000442698 | 0.720551 | -1.38783 |
| Hmgb1    | NM_010439    | 0.000315521 | 0.855244 | -1.16926 | 0.000571947 | 0.720424 | -1.38807 |
| Eif2s2   | NM_026030    | 1.22E-06    | 0.58338  | -1.71415 | 0.00021608  | 0.719419 | -1.39001 |
| Anapc1   | NM_008569    | 3.36E-05    | 0.796732 | -1.25513 | 4.14E-05    | 0.716258 | -1.39614 |
| Sox11    | NM_009234    | 1.17E-06    | 0.464612 | -2.15234 | 0.000509007 | 0.714722 | -1.39915 |
| Bat2     | NM_020027    | 0.00097065  | 0.690774 | -1.44765 | 0.000238425 | 0.714172 | -1.40022 |
| Psip1    | NM_133948    | 2.62E-06    | 0.55238  | -1.81035 | 0.000339257 | 0.713914 | -1.40073 |
| Psenen   | NM_025498    | 0.000418797 | 0.706354 | -1.41572 | 6.26E-05    | 0.713802 | -1.40095 |
| E2f4     | NM_148952    | 3.75E-05    | 0.801862 | -1.2471  | 0.000409249 | 0.712941 | -1.40264 |
| Trip6    | NM_011639    | 5.55E-05    | 0.703612 | -1.42124 | 6.83E-06    | 0.71271  | -1.4031  |
| B4galnt4 | NM_177897    | 6.06E-05    | 0.57703  | -1.73301 | 6.37E-05    | 0.710227 | -1.408   |
| Tubb5    | NM_011655    | 2.10E-05    | 0.813656 | -1.22902 | 0.00040568  | 0.709539 | -1.40937 |
| Psmc5    | NM_080554    | 3.33E-05    | 0.726206 | -1.37702 | 0.000353001 | 0.707078 | -1.41427 |
| Ddx47    | NM_026360    | 0.0005255   | 0.699054 | -1.4305  | 0.000337955 | 0.704993 | -1.41845 |
| Cdc42ep1 | NM_027219    | 0.000586833 | 0.752696 | -1.32856 | 0.000348927 | 0.704731 | -1.41898 |
| Phb      | NM_008831    | 0.00061852  | 0.802708 | -1.24578 | 9.57E-05    | 0.703169 | -1.42213 |
| Zfp27    | NM_001037707 | 3.96E-06    | 0.653117 | -1.53112 | 0.000413991 | 0.702978 | -1.42252 |
| Mtdh     | NM_026002    | 0.000400666 | 0.733173 | -1.36393 | 7.72E-06    | 0.70123  | -1.42607 |
| Dgcr8    | NM_033324    | 0.000363864 | 0.768854 | -1.30064 | 0.000186496 | 0.700465 | -1.42762 |
| Ube2k    | NM_016786    | 0.00025508  | 0.677131 | -1.47682 | 0.00017959  | 0.699244 | -1.43012 |
| Csnk2a1  | NM_007788    | 5.72E-06    | 0.726708 | -1.37607 | 7.96E-05    | 0.699013 | -1.43059 |
| Exosc7   | NM_001081188 | 0.000811273 | 0.667634 | -1.49783 | 0.000300137 | 0.698574 | -1.43149 |
| BC016423 | NM_134063    | 8.85E-06    | 0.614704 | -1.6268  | 5.25E-05    | 0.69701  | -1.4347  |
| Eif3d    | NM_018749    | 3.54E-06    | 0.790124 | -1.26562 | 7.12E-05    | 0.696693 | -1.43535 |
| Stk3     | NM_019635    | 1.64E-05    | 0.710018 | -1.40841 | 1.44E-05    | 0.696274 | -1.43622 |
| Prpf3    | NM_027541    | 8.44E-06    | 0.583977 | -1.7124  | 0.000270678 | 0.695134 | -1.43857 |
| Nup205   | NM_027513    | 0.000587636 | 0.890631 | -1.1228  | 0.000323261 | 0.694355 | -1.44018 |
| Ppm1g    | NM_008014    | 9.32E-06    | 0.642422 | -1.55661 | 4.29E-05    | 0.693659 | -1.44163 |
| Mtap     | NM_024433    | 0.000143171 | 0.73095  | -1.36808 | 7.68E-05    | 0.693658 | -1.44163 |
| Acsl4    | NM_207625    | 3.59E-06    | 0.553606 | -1.80634 | 0.000328477 | 0.692852 | -1.44331 |
| Timm8a1  | NM_013898    | 0.000458832 | 0.608101 | -1.64446 | 0.000466452 | 0.692787 | -1.44345 |
| Ddx51    | NM_027156    | 0.000793018 | 0.853838 | -1.17118 | 0.000261397 | 0.692693 | -1.44364 |
| Eif4e    | NM_007917    | 4.47E-05    | 0.651962 | -1.53383 | 1.24E-05    | 0.692669 | -1.44369 |
| Ssb      | NM_009278    | 0.000392067 | 0.717246 | -1.39422 | 5.50E-06    | 0.692339 | -1.44438 |
| F2r      | NM_010169    | 2.36E-05    | 0.735235 | -1.36011 | 4.61E-05    | 0.691609 | -1.4459  |
| Slc25a33 | NM_027460    | 0.000526259 | 0.69894  | -1.43074 | 0.000172879 | 0.690995 | -1.44719 |
| Rbm25    | NM_027349    | 5.60E-05    | 0.645064 | -1.55023 | 1.41E-05    | 0.690985 | -1.44721 |
| Kpnb1    | NM_008379    | 0.00083817  | 0.77943  | -1.28299 | 2.80E-07    | 0.68902  | -1.45134 |
| Ppil1    | NM_026845    | 0.000285228 | 0.520717 | -1.92043 | 0.000307809 | 0.687878 | -1.45375 |
| Ubr5     | NM_001081359 | 1.17E-05    | 0.697663 | -1.43336 | 3.67E-05    | 0.684783 | -1.46032 |
| Cct3     | NM_009836    | 4.03E-05    | 0.686723 | -1.45619 | 0.000403918 | 0.684036 | -1.46191 |
| Cand1    | NM_027994    | 1.07E-06    | 0.630188 | -1.58683 | 2.94E-05    | 0.683888 | -1.46223 |
| Wbp11    | NM_021714    | 0.000677505 | 0.777952 | -1.28543 | 3.33E-05    | 0.683623 | -1.46279 |

|           |              |             |          |          |             |          |          |
|-----------|--------------|-------------|----------|----------|-------------|----------|----------|
| Polr2i    | NM_027259    | 7.86E-05    | 0.590305 | -1.69404 | 0.000175807 | 0.682861 | -1.46443 |
| Flot1     | NM_008027    | 1.92E-08    | 0.509789 | -1.9616  | 0.000189132 | 0.681314 | -1.46775 |
| Atf2      | NM_019717    | 1.91E-06    | 0.604646 | -1.65386 | 0.000134604 | 0.681101 | -1.46821 |
| Kcnc5     | NM_021542    | 4.65E-05    | 0.742923 | -1.34603 | 0.000291033 | 0.679073 | -1.4726  |
| Esf1      | NM_001081090 | 0.000475559 | 0.687678 | -1.45417 | 2.32E-05    | 0.675675 | -1.48    |
| Myst2     | NM_177619    | 0.000473535 | 0.824144 | -1.21338 | 0.000108803 | 0.674533 | -1.48251 |
| Hist1h2ao | NM_001177544 | 2.19E-05    | 0.71245  | -1.40361 | 0.000317009 | 0.674081 | -1.4835  |
| Tagap1    | NM_147155    | 0.000833835 | 0.600505 | -1.66527 | 0.000379796 | 0.673314 | -1.48519 |
| Hist1h2af | NM_175661    | 1.05E-08    | 0.716853 | -1.39499 | 0.000339169 | 0.672037 | -1.48801 |
| Cep192    | NM_027556    | 0.000829311 | 0.614306 | -1.62785 | 0.000773002 | 0.671688 | -1.48879 |
| Amd1      | NM_009665    | 2.49E-05    | 0.776297 | -1.28817 | 0.000240536 | 0.671528 | -1.48914 |
| Trmt112   | NM_001166370 | 2.78E-05    | 0.631873 | -1.5826  | 2.75E-05    | 0.67087  | -1.4906  |
| Phf23     | NM_030064    | 1.39E-05    | 0.636811 | -1.57032 | 1.33E-05    | 0.668797 | -1.49522 |
| Armcx2    | NM_026139    | 3.88E-07    | 0.514706 | -1.94286 | 0.000549133 | 0.668236 | -1.49648 |
| Rdh13     | NM_175372    | 0.000313017 | 0.85812  | -1.16534 | 0.000323606 | 0.668193 | -1.49657 |
| Lmnb2     | NM_010722    | 0.000118886 | 0.695875 | -1.43704 | 0.00050217  | 0.667525 | -1.49807 |
| Nr2c2ap   | NM_001025586 | 1.60E-05    | 0.606756 | -1.64811 | 0.000331204 | 0.666718 | -1.49988 |
| Fam57a    | NM_027773    | 4.47E-05    | 0.741831 | -1.34802 | 6.55E-05    | 0.666606 | -1.50014 |
| Pnn       | NM_008891    | 7.79E-07    | 0.777796 | -1.28568 | 1.94E-08    | 0.665551 | -1.50252 |
| Usp5      | NM_013700    | 3.15E-05    | 0.703809 | -1.42084 | 2.18E-05    | 0.664553 | -1.50477 |
| Rpl7l1    | NM_025433    | 0.000175619 | 0.670842 | -1.49066 | 0.000300848 | 0.663341 | -1.50752 |
| Adat2     | NM_025748    | 0.00045288  | 0.7173   | -1.39412 | 1.47E-05    | 0.663284 | -1.50765 |
| Ddx18     | NM_025860    | 0.000242581 | 0.79737  | -1.25412 | 4.81E-06    | 0.661171 | -1.51247 |
| Tbcb      | NM_025548    | 0.000117697 | 0.680895 | -1.46865 | 5.31E-05    | 0.660931 | -1.51302 |
| Hist1h2an | NM_178184    | 1.21E-09    | 0.700763 | -1.42702 | 0.000242559 | 0.660657 | -1.51364 |
| Cep57     | NM_026665    | 1.15E-05    | 0.734876 | -1.36077 | 9.72E-05    | 0.660622 | -1.51372 |
| Wdr82     | NM_029896    | 1.46E-08    | 0.581471 | -1.71978 | 6.33E-05    | 0.660477 | -1.51406 |
| Usp10     | NM_009462    | 4.30E-05    | 0.68466  | -1.46058 | 8.13E-07    | 0.659856 | -1.51548 |
| Uba2      | NM_016682    | 7.90E-05    | 0.782897 | -1.27731 | 0.000522025 | 0.659233 | -1.51691 |
| N6amt2    | NM_026526    | 0.00061659  | 0.734573 | -1.36134 | 0.000240284 | 0.659105 | -1.51721 |
| Gnl3l     | NM_198110    | 1.16E-05    | 0.552208 | -1.81091 | 4.75E-05    | 0.658532 | -1.51853 |
| Kri1      | NM_145416    | 0.000407886 | 0.749265 | -1.33464 | 3.64E-05    | 0.657656 | -1.52055 |
| Patl1     | NM_172635    | 0.000139375 | 0.707513 | -1.4134  | 0.000147514 | 0.6569   | -1.5223  |
| Fgfr1op   | NM_201230    | 3.36E-05    | 0.599581 | -1.66783 | 0.000154836 | 0.655738 | -1.525   |
| Abi2      | NM_198127    | 4.94E-06    | 0.747449 | -1.33788 | 0.00087745  | 0.65532  | -1.52597 |
| Rbm8a     | NM_001102407 | 8.06E-05    | 0.766475 | -1.30467 | 1.62E-05    | 0.654945 | -1.52685 |
| Apex1     | NM_009687    | 5.67E-07    | 0.553344 | -1.8072  | 5.02E-05    | 0.654401 | -1.52811 |
| Nup153    | NM_175749    | 0.000551116 | 0.786322 | -1.27174 | 5.28E-07    | 0.654097 | -1.52883 |
| Myg1      | NM_021713    | 0.000177392 | 0.774233 | -1.2916  | 2.42E-05    | 0.653884 | -1.52932 |
| Mia3      | NM_177389    | 8.82E-05    | 0.696032 | -1.43672 | 4.12E-06    | 0.652752 | -1.53198 |
| Xpo4      | NM_020506    | 0.000183392 | 0.739896 | -1.35154 | 4.91E-06    | 0.650478 | -1.53733 |
| Got1      | NM_010324    | 9.99E-05    | 0.658521 | -1.51856 | 4.24E-06    | 0.650216 | -1.53795 |
| Sarnp     | NM_025364    | 2.69E-05    | 0.648506 | -1.54201 | 0.000108845 | 0.64969  | -1.53919 |

|               |                    |             |          |          |             |          |          |
|---------------|--------------------|-------------|----------|----------|-------------|----------|----------|
| Etf1          | NM_144866          | 1.19E-06    | 0.625593 | -1.59848 | 1.00E-05    | 0.647624 | -1.54411 |
| Ppp1cc        | NM_013636          | 1.43E-06    | 0.653868 | -1.52936 | 5.13E-06    | 0.647566 | -1.54424 |
| Stoml2        | NM_023231          | 0.000547862 | 0.775697 | -1.28916 | 3.73E-05    | 0.646759 | -1.54617 |
| Dpysl2        | NM_009955          | 1.11E-05    | 0.574428 | -1.74086 | 3.29E-07    | 0.645804 | -1.54846 |
| Acaca         | NM_133360          | 0.00035967  | 0.722292 | -1.38448 | 0.000375321 | 0.645462 | -1.54928 |
| Mras          | NM_008624          | 1.37E-07    | 0.274646 | -3.64106 | 6.01E-05    | 0.645127 | -1.55008 |
| 2410002F23Rik | NM_025880          | 4.53E-07    | 0.637285 | -1.56916 | 8.30E-06    | 0.644968 | -1.55047 |
| Skiv2l2       | NM_028151          | 0.000147754 | 0.654651 | -1.52753 | 0.000544107 | 0.643873 | -1.5531  |
| Shc2          | NM_001024539       | 3.40E-05    | 0.74108  | -1.34938 | 0.000156976 | 0.642593 | -1.5562  |
| Rcor2         | NM_054048          | 9.63E-05    | 0.637556 | -1.56849 | 0.000338989 | 0.64106  | -1.55992 |
| Mbd3          | NM_013595          | 1.93E-06    | 0.686911 | -1.45579 | 1.12E-05    | 0.639751 | -1.56311 |
| 2900092E17Rik | NM_030240          | 0.000108063 | 0.789086 | -1.26729 | 9.27E-05    | 0.639522 | -1.56367 |
| Dcun1d2       | NM_001024504       | 0.000555167 | 1.33364  | 1.33364  | 8.37E-06    | 0.639169 | -1.56453 |
| Nup85         | NM_001002929       | 1.81E-05    | 0.809793 | -1.23488 | 0.000221377 | 0.637978 | -1.56745 |
| Dse           | NM_172508          | 6.10E-06    | 0.615348 | -1.6251  | 1.01E-09    | 0.635577 | -1.57337 |
| Ptar1         | NM_028208          | 5.18E-05    | 1.42323  | 1.42323  | 1.61E-05    | 0.635028 | -1.57473 |
| Pcna          | NM_011045          | 6.58E-05    | 0.623546 | -1.60373 | 0.000389091 | 0.632661 | -1.58062 |
| Cited2        | NM_010828          | 8.32E-10    | 0.549998 | -1.81819 | 3.92E-06    | 0.630728 | -1.58547 |
| Slbp          | NM_009193          | 1.18E-05    | 0.711608 | -1.40527 | 6.30E-05    | 0.630579 | -1.58585 |
| Pecr          | NM_023523          | 3.39E-05    | 0.573587 | -1.74342 | 3.47E-05    | 0.629107 | -1.58955 |
| Atxn7l2       | ENSMUST00000102633 | 4.06E-06    | 0.612656 | -1.63224 | 6.58E-05    | 0.623558 | -1.6037  |
| Sf3b3         | NM_133953          | 0.000477438 | 0.859547 | -1.1634  | 1.75E-08    | 0.622643 | -1.60606 |
| Phf13         | NM_172705          | 1.33E-05    | 0.587931 | -1.70088 | 2.23E-05    | 0.621512 | -1.60898 |
| 4930444A02Rik | NM_029037          | 0.000340883 | 0.747428 | -1.33792 | 3.57E-06    | 0.621488 | -1.60904 |
| Seh1l         | NM_001039088       | 2.70E-07    | 0.612987 | -1.63136 | 4.89E-05    | 0.621309 | -1.60951 |
| Ctu2          | NM_153775          | 3.90E-06    | 0.661763 | -1.51111 | 9.46E-06    | 0.620935 | -1.61047 |
| 0610007P14Rik | NM_021446          | 0.000293345 | 0.688255 | -1.45295 | 7.52E-05    | 0.620656 | -1.6112  |
| Zmym1         | NM_026670          | 1.35E-06    | 0.504189 | -1.98338 | 8.73E-05    | 0.619847 | -1.6133  |
| Fzr1          | NM_019757          | 1.78E-08    | 0.515579 | -1.93957 | 3.13E-05    | 0.619019 | -1.61546 |
| Rsl1d1        | NM_025546          | 5.06E-05    | 0.818133 | -1.2223  | 1.48E-05    | 0.618926 | -1.6157  |
| Kctd15        | ENSMUST00000032709 | 1.93E-05    | 0.615233 | -1.6254  | 1.26E-05    | 0.617278 | -1.62002 |
| Emg1          | NM_013536          | 5.91E-05    | 0.646328 | -1.5472  | 0.000216538 | 0.61401  | -1.62864 |
| Uck2          | NM_030724          | 2.96E-09    | 0.529178 | -1.88972 | 4.65E-06    | 0.613524 | -1.62993 |
| Pds5a         | NM_001081321       | 2.45E-07    | 0.637467 | -1.56871 | 4.08E-08    | 0.613441 | -1.63015 |
| Bzw2          | NM_025840          | 0.0001401   | 0.746494 | -1.3396  | 5.64E-05    | 0.61285  | -1.63172 |
| Trim28        | NM_011588          | 8.59E-05    | 0.728043 | -1.37354 | 1.66E-06    | 0.610708 | -1.63744 |
| Kras          | NM_021284          | 0.000223101 | 0.599794 | -1.66724 | 4.33E-07    | 0.61025  | -1.63867 |
| Slc7a6        | NM_178798          | 8.02E-06    | 0.557739 | -1.79295 | 3.34E-06    | 0.60986  | -1.63972 |
| Prpf38b       | NM_025845          | 2.54E-08    | 0.66482  | -1.50417 | 6.23E-06    | 0.609228 | -1.64142 |
| Nup98         | NM_022979          | 1.22E-05    | 0.732765 | -1.36469 | 1.67E-06    | 0.609022 | -1.64198 |
| Mtmr4         | NM_133215          | 0.000564102 | 0.840277 | -1.19008 | 0.000241377 | 0.608411 | -1.64363 |
| Atl3          | NM_146091          | 0.000151085 | 0.69775  | -1.43318 | 8.51E-06    | 0.608205 | -1.64418 |
| Cstf2         | NM_133196          | 2.81E-06    | 0.640341 | -1.56167 | 1.11E-06    | 0.607571 | -1.6459  |

|               |                    |             |          |          |             |          |          |
|---------------|--------------------|-------------|----------|----------|-------------|----------|----------|
| Hnrnpd        | NM_001077265       | 3.55E-05    | 0.657371 | -1.52121 | 2.60E-06    | 0.607256 | -1.64675 |
| Cry2          | NM_009963          | 1.17E-06    | 0.570987 | -1.75135 | 0.000106655 | 0.606598 | -1.64854 |
| Qrich1        | NM_001114119       | 1.55E-06    | 0.680406 | -1.46971 | 3.15E-05    | 0.604684 | -1.65376 |
| Erc1          | NM_053204          | 0.000921021 | 0.855569 | -1.16881 | 2.53E-05    | 0.601911 | -1.66137 |
| 1700029F09Rik | BC119032           | 0.00025254  | 0.581758 | -1.71893 | 4.79E-06    | 0.601645 | -1.66211 |
| Ubp2l         | NM_028475          | 2.55E-08    | 0.713001 | -1.40252 | 6.14E-06    | 0.599645 | -1.66765 |
| Arl6ip6       | NM_022989          | 2.93E-05    | 0.580651 | -1.72221 | 2.89E-06    | 0.599241 | -1.66878 |
| Kirrel        | NM_001170985       | 4.56E-10    | 0.46177  | -2.16558 | 0.000327105 | 0.594991 | -1.6807  |
| Cul2          | NM_029402          | 0.000925849 | 0.586151 | -1.70604 | 0.000185858 | 0.594051 | -1.68336 |
| Gm13310       | XR_032234          | 0.00038437  | 0.642093 | -1.55741 | 0.000120416 | 0.593728 | -1.68427 |
| Ezh2          | NM_007971          | 2.62E-07    | 0.572801 | -1.74581 | 0.000825108 | 0.59333  | -1.6854  |
| Mthfd1l       | NM_172308          | 8.53E-06    | 0.605042 | -1.65278 | 3.40E-06    | 0.59276  | -1.68702 |
| Ctdspl2       | NM_212450          | 0.000106234 | 0.630484 | -1.58608 | 0.000124112 | 0.592016 | -1.68914 |
| Hist1h2be     | NM_001177653       | 7.63E-05    | 0.46855  | -2.13424 | 0.000447609 | 0.591989 | -1.68922 |
| Tpr           | NM_133780          | 0.000353709 | 0.7248   | -1.37969 | 2.82E-05    | 0.591177 | -1.69154 |
| Dact1         | NM_021532          | 1.36E-06    | 0.351449 | -2.84536 | 0.000471273 | 0.589662 | -1.69589 |
| Cdc25b        | NM_023117          | 0.000146531 | 0.747446 | -1.33789 | 6.84E-05    | 0.589044 | -1.69767 |
| Klh7          | NM_026448          | 5.02E-07    | 0.559784 | -1.7864  | 1.19E-05    | 0.588677 | -1.69872 |
| Gm10786       | ENSMUST00000099550 | 0.000478311 | 1.8252   | 1.8252   | 0.00033915  | 0.588399 | -1.69953 |
| Gpn1          | NM_133756          | 5.35E-05    | 0.599319 | -1.66856 | 0.000168474 | 0.58739  | -1.70245 |
| BC052040      | NM_001145898       | 0.000121438 | 0.655289 | -1.52605 | 3.45E-05    | 0.587266 | -1.70281 |
| Whsc1         | NM_001081102       | 3.37E-05    | 0.58979  | -1.69552 | 2.53E-06    | 0.586088 | -1.70623 |
| Dna2          | NM_177372          | 2.93E-10    | 1.66803  | 1.66803  | 8.79E-05    | 0.586082 | -1.70625 |
| Cdca3         | NM_013538          | 6.33E-06    | 0.60498  | -1.65295 | 4.68E-05    | 0.585325 | -1.70845 |
| Sfmbt2        | NM_177386          | 4.74E-10    | 0.262089 | -3.8155  | 7.88E-05    | 0.584204 | -1.71173 |
| 2810417H13Rik | NM_026515          | 0.000135959 | 0.611076 | -1.63646 | 0.000679095 | 0.583533 | -1.7137  |
| Igf2bp3       | NM_023670          | 2.23E-06    | 0.547276 | -1.82723 | 0.000115524 | 0.583208 | -1.71465 |
| Cdk5rap2      | NM_145990          | 3.82E-05    | 0.753972 | -1.32631 | 8.23E-05    | 0.582244 | -1.71749 |
| Tomm70a       | NM_138599          | 3.63E-07    | 0.645532 | -1.54911 | 4.37E-06    | 0.581742 | -1.71897 |
| Casp2         | NM_007610          | 0.000474945 | 0.719712 | -1.38945 | 6.01E-06    | 0.581396 | -1.72    |
| Rhobtb2       | NM_153514          | 6.96E-06    | 0.650158 | -1.53809 | 0.000559767 | 0.580543 | -1.72253 |
| Cntrob        | NM_172560          | 0.000104348 | 0.773816 | -1.2923  | 1.31E-07    | 0.58025  | -1.72339 |
| Hist1h3g      | NM_145073          | 8.66E-06    | 0.680606 | -1.46928 | 0.000235077 | 0.579247 | -1.72638 |
| Pkn2          | NM_178654          | 0.000694316 | 0.711417 | -1.40565 | 1.07E-05    | 0.57885  | -1.72756 |
| Nsun2         | NM_145354          | 0.000133136 | 0.762589 | -1.31132 | 1.86E-06    | 0.578665 | -1.72812 |
| 2810030E01Rik | NM_028317          | 9.51E-05    | 0.584074 | -1.71211 | 0.000744253 | 0.577786 | -1.73074 |
| Cdk2          | NM_183417          | 1.92E-09    | 0.632508 | -1.58101 | 3.18E-05    | 0.577528 | -1.73152 |
| Mcrs1         | NM_016766          | 0.000106328 | 0.78642  | -1.27159 | 0.000107619 | 0.577403 | -1.73189 |
| Vps72         | NM_009336          | 0.000982665 | 0.793639 | -1.26002 | 0.00011647  | 0.576789 | -1.73374 |
| Tra2b         | NM_009186          | 1.20E-06    | 0.665211 | -1.50328 | 2.36E-07    | 0.576778 | -1.73377 |
| Tpbg          | NM_011627          | 0.00024653  | 0.766097 | -1.30532 | 0.000638357 | 0.575826 | -1.73664 |
| Kpna2         | NM_010655          | 3.91E-07    | 0.696478 | -1.4358  | 2.50E-06    | 0.575166 | -1.73863 |
| Zfp131        | NM_028245          | 2.86E-06    | 0.596452 | -1.67658 | 7.50E-07    | 0.575142 | -1.7387  |

|               |              |             |          |          |             |          |          |
|---------------|--------------|-------------|----------|----------|-------------|----------|----------|
| Sfrs7         | NM_146083    | 0.000847626 | 0.666419 | -1.50056 | 0.000281426 | 0.574569 | -1.74043 |
| Zfp280b       | NM_177475    | 2.71E-06    | 0.494645 | -2.02165 | 6.30E-05    | 0.571471 | -1.74987 |
| Stil          | NM_009185    | 0.000264623 | 0.687433 | -1.45469 | 0.000910424 | 0.571455 | -1.74992 |
| Tdg           | NM_172552    | 0.000981533 | 0.819879 | -1.21969 | 6.00E-06    | 0.570287 | -1.7535  |
| Trim27        | NM_009054    | 0.000457415 | 0.676638 | -1.47789 | 3.00E-06    | 0.570207 | -1.75375 |
| Tfrc          | NM_011638    | 5.45E-08    | 0.448057 | -2.23186 | 0.000639232 | 0.569924 | -1.75462 |
| Gm11277       | NM_001110555 | 6.96E-09    | 0.478502 | -2.08986 | 0.00048994  | 0.569205 | -1.75684 |
| Vasp          | NM_009499    | 1.03E-05    | 0.599884 | -1.66699 | 1.49E-05    | 0.568277 | -1.7597  |
| Hist1h2bc     | NM_023422    | 2.79E-08    | 0.48206  | -2.07443 | 0.000389506 | 0.56805  | -1.76041 |
| Hist1h3d      | NM_178204    | 3.99E-06    | 0.670795 | -1.49077 | 0.000238976 | 0.566808 | -1.76427 |
| Hist2h3b      | NM_178215    | 6.55E-06    | 0.678349 | -1.47417 | 0.000211659 | 0.566585 | -1.76496 |
| Hist1h3f      | NM_013548    | 4.41E-06    | 0.683372 | -1.46333 | 0.000259536 | 0.565206 | -1.76927 |
| Gk5           | NM_177352    | 1.81E-05    | 0.612446 | -1.6328  | 0.000387802 | 0.564895 | -1.77024 |
| Pomt1         | NM_145145    | 0.000222789 | 0.610572 | -1.63781 | 8.64E-05    | 0.564559 | -1.77129 |
| 4931414P19Rik | BC029624     | 5.58E-05    | 0.636288 | -1.57162 | 0.000141525 | 0.564531 | -1.77138 |
| Slc38a2       | NM_175121    | 4.87E-07    | 0.71988  | -1.38912 | 5.26E-07    | 0.563664 | -1.77411 |
| Ank2          | NM_178655    | 2.99E-08    | 1.47437  | 1.47437  | 1.28E-05    | 0.563639 | -1.77418 |
| Epb4.1l4a     | NM_013512    | 4.39E-06    | 0.486661 | -2.05482 | 6.07E-05    | 0.563153 | -1.77572 |
| Zfp280c       | NM_153532    | 8.73E-05    | 0.672189 | -1.48768 | 0.000168731 | 0.562053 | -1.77919 |
| Gm5263        | XR_033865    | 3.34E-05    | 0.560405 | -1.78442 | 6.44E-05    | 0.561534 | -1.78084 |
| Exosc5        | NM_138586    | 0.000236978 | 0.701609 | -1.4253  | 2.10E-07    | 0.561267 | -1.78168 |
| E130306D19Rik | NM_001013377 | 2.00E-06    | 0.50041  | -1.99836 | 0.00015289  | 0.560356 | -1.78458 |
| 1110004F10Rik | NM_019772    | 0.000285422 | 0.56607  | -1.76657 | 3.30E-05    | 0.559134 | -1.78848 |
| lfrd1         | NM_013562    | 7.88E-07    | 0.509856 | -1.96134 | 3.37E-05    | 0.557662 | -1.7932  |
| Pif1          | NM_172453    | 1.58E-07    | 0.346795 | -2.88355 | 0.000113599 | 0.557618 | -1.79334 |
| Tnk2          | NM_016788    | 8.64E-06    | 0.657456 | -1.52101 | 1.06E-06    | 0.557322 | -1.7943  |
| Acsi3         | NM_028817    | 3.18E-08    | 0.47877  | -2.08869 | 0.000302866 | 0.55684  | -1.79585 |
| Tmem39b       | NM_199305    | 0.00058054  | 0.833836 | -1.19928 | 1.56E-06    | 0.555079 | -1.80154 |
| Jtb           | NM_206924    | 0.000303994 | 0.587202 | -1.70299 | 5.57E-06    | 0.553497 | -1.80669 |
| Ube2s         | NM_133777    | 1.21E-06    | 0.515722 | -1.93903 | 2.97E-06    | 0.552224 | -1.81086 |
| Piga          | NM_011081    | 0.00071908  | 0.605684 | -1.65103 | 3.30E-05    | 0.551365 | -1.81368 |
| Ube2e3        | NM_009454    | 1.79E-05    | 0.484178 | -2.06536 | 0.000259369 | 0.549825 | -1.81876 |
| Akap8         | NM_019774    | 8.08E-05    | 0.692371 | -1.44431 | 1.69E-05    | 0.549485 | -1.81989 |
| Usp36         | NM_001033528 | 4.32E-06    | 0.718489 | -1.39181 | 0.000135751 | 0.547242 | -1.82734 |
| Topors        | NM_134097    | 1.30E-05    | 0.646514 | -1.54676 | 7.45E-08    | 0.545914 | -1.83179 |
| Dbf4          | NM_013726    | 3.17E-07    | 0.519062 | -1.92655 | 4.18E-06    | 0.545466 | -1.83329 |
| Syde2         | NM_001166064 | 3.94E-06    | 0.525199 | -1.90404 | 1.48E-05    | 0.544391 | -1.83691 |
| Mett10d       | NM_026197    | 5.34E-05    | 0.640274 | -1.56183 | 0.00018288  | 0.544087 | -1.83794 |
| Ankrd27       | NM_145633    | 0.000112509 | 0.720481 | -1.38796 | 9.50E-07    | 0.543846 | -1.83875 |
| Steap2        | NM_001103157 | 2.24E-09    | 0.399182 | -2.50513 | 7.93E-05    | 0.543758 | -1.83905 |
| Anp32b        | NM_130889    | 1.26E-06    | 0.573854 | -1.7426  | 8.22E-06    | 0.542076 | -1.84476 |
| Ankrd26       | NM_001081112 | 0.000366219 | 1.44383  | 1.44383  | 4.87E-05    | 0.542001 | -1.84502 |
| Anp32e        | NM_023210    | 7.41E-07    | 0.442145 | -2.2617  | 3.88E-05    | 0.539746 | -1.85272 |



|               |              |             |          |          |             |          |          |
|---------------|--------------|-------------|----------|----------|-------------|----------|----------|
| Fscn1         | NM_007984    | 6.18E-05    | 0.618511 | -1.61679 | 1.22E-06    | 0.537026 | -1.86211 |
| Anp32a        | NM_009672    | 3.21E-05    | 0.581432 | -1.71989 | 3.49E-05    | 0.536229 | -1.86488 |
| Tbl1x         | NM_020601    | 1.05E-05    | 0.540233 | -1.85105 | 0.000419666 | 0.535376 | -1.86785 |
| Heatr1        | NM_144835    | 0.000433372 | 0.859229 | -1.16383 | 4.37E-07    | 0.535311 | -1.86807 |
| Chd1l         | NM_026539    | 9.44E-05    | 0.736475 | -1.35782 | 3.73E-05    | 0.534617 | -1.8705  |
| Ibtk          | NM_001081282 | 2.21E-05    | 0.8057   | -1.24116 | 1.48E-06    | 0.533646 | -1.8739  |
| Ephb4         | NM_001159571 | 1.71E-07    | 0.496331 | -2.01479 | 2.75E-06    | 0.532967 | -1.87629 |
| Slc25a13      | NM_015829    | 1.40E-06    | 0.617287 | -1.61999 | 6.98E-05    | 0.532383 | -1.87835 |
| Agfg2         | NM_178162    | 6.04E-08    | 0.546818 | -1.82876 | 7.55E-06    | 0.531204 | -1.88252 |
| Vangl2        | NM_033509    | 6.02E-06    | 0.64971  | -1.53915 | 3.04E-06    | 0.530881 | -1.88366 |
| Sqle          | NM_009270    | 1.08E-06    | 0.562114 | -1.779   | 0.000231275 | 0.528043 | -1.89379 |
| F630043A04Rik | NM_198605    | 0.000898509 | 0.792383 | -1.26202 | 0.000676098 | 0.52711  | -1.89714 |
| Pde4d         | NM_011056    | 2.37E-11    | 0.454515 | -2.20015 | 3.26E-07    | 0.524051 | -1.90821 |
| Ilf3          | NM_010561    | 4.78E-07    | 0.693502 | -1.44196 | 5.99E-07    | 0.52372  | -1.90942 |
| Nfya          | NM_001110832 | 1.69E-05    | 0.624956 | -1.60011 | 8.98E-05    | 0.523646 | -1.90969 |
| Yipf2         | NM_138303    | 8.88E-06    | 1.5994   | 1.5994   | 2.91E-06    | 0.523408 | -1.91056 |
| Lars          | NM_134137    | 4.16E-05    | 0.700842 | -1.42685 | 5.13E-06    | 0.5233   | -1.91095 |
| Phf12         | NM_174852    | 3.32E-06    | 0.627484 | -1.59367 | 0.000157467 | 0.521362 | -1.91805 |
| Nasp          | NM_016777    | 2.01E-05    | 0.639984 | -1.56254 | 0.000117583 | 0.520767 | -1.92024 |
| Hcfc1         | NM_008224    | 2.41E-08    | 0.545589 | -1.83288 | 5.79E-05    | 0.520575 | -1.92095 |
| Zfp462        | NM_172867    | 4.91E-09    | 0.383559 | -2.60716 | 0.000361502 | 0.520334 | -1.92184 |
| Hist1h2bm     | NM_178200    | 1.46E-06    | 0.437838 | -2.28395 | 4.72E-05    | 0.520261 | -1.92211 |
| Cks2          | NM_025415    | 0.000810046 | 0.436499 | -2.29095 | 3.99E-06    | 0.520017 | -1.92301 |
| Hist1h2ak     | NM_178183    | 0.000285429 | 0.601426 | -1.66271 | 0.000391212 | 0.519968 | -1.9232  |
| Scd1          | NM_009127    | 4.07E-10    | 0.404476 | -2.47234 | 3.69E-05    | 0.516531 | -1.93599 |
| Bcat1         | NM_001024468 | 1.96E-09    | 0.581694 | -1.71912 | 7.88E-06    | 0.516424 | -1.93639 |
| Mcm10         | NM_027290    | 0.000168786 | 0.724256 | -1.38073 | 0.00022876  | 0.514907 | -1.9421  |
| Sfrs13a       | NM_001080387 | 0.000176883 | 0.637385 | -1.56891 | 1.47E-05    | 0.513627 | -1.94694 |
| Ltv1          | NM_181470    | 0.000446957 | 0.678649 | -1.47352 | 0.000402629 | 0.513177 | -1.94864 |
| Ppan          | NM_145610    | 2.16E-05    | 0.717588 | -1.39356 | 7.45E-06    | 0.512473 | -1.95132 |
| Spag7         | NM_172561    | 0.000563642 | 0.681702 | -1.46692 | 2.92E-06    | 0.511788 | -1.95394 |
| Rrp15         | NM_026041    | 3.75E-05    | 0.636765 | -1.57044 | 5.56E-08    | 0.511648 | -1.95447 |
| Dlgap5        | NM_144553    | 3.44E-05    | 0.712061 | -1.40437 | 0.000507178 | 0.510762 | -1.95786 |
| Ccdc14        | NM_172824    | 9.85E-05    | 0.661485 | -1.51175 | 1.45E-05    | 0.509792 | -1.96158 |
| Slc38a1       | NM_134086    | 0.000101486 | 0.576112 | -1.73577 | 3.45E-05    | 0.509551 | -1.96251 |
| Tcfap4        | NM_031182    | 5.41E-06    | 0.613614 | -1.62969 | 4.83E-05    | 0.508117 | -1.96805 |
| Mrps18b       | NM_025878    | 9.62E-05    | 0.524077 | -1.90812 | 5.47E-05    | 0.503226 | -1.98718 |
| Fam48a        | NM_019995    | 1.00E-07    | 0.591867 | -1.68957 | 3.57E-05    | 0.501458 | -1.99419 |
| D2Ert750e     | NM_026412    | 0.000975656 | 0.722143 | -1.38477 | 0.000952899 | 0.499391 | -2.00244 |
| Dennd4a       | NM_001162917 | 3.10E-05    | 0.68932  | -1.4507  | 1.57E-05    | 0.497278 | -2.01095 |
| C1qbp         | NM_007573    | 4.40E-05    | 0.738802 | -1.35354 | 1.73E-08    | 0.49396  | -2.02446 |
| Phf19         | NM_028716    | 7.84E-07    | 0.48279  | -2.07129 | 5.25E-06    | 0.49194  | -2.03277 |
| Zmynd19       | NM_026021    | 0.000334971 | 0.702242 | -1.42401 | 1.55E-06    | 0.491176 | -2.03593 |

|               |              |             |          |          |             |          |          |
|---------------|--------------|-------------|----------|----------|-------------|----------|----------|
| Sin3a         | NM_011378    | 6.55E-08    | 0.488023 | -2.04909 | 8.48E-05    | 0.48797  | -2.04931 |
| Hnrnpr        | NM_028871    | 5.76E-09    | 0.500264 | -1.99895 | 7.43E-06    | 0.486849 | -2.05403 |
| Uspl1         | NM_001115153 | 1.07E-06    | 0.608795 | -1.64259 | 2.84E-07    | 0.486    | -2.05761 |
| Tatdn2        | NM_001033463 | 2.68E-05    | 0.549085 | -1.82121 | 5.04E-06    | 0.485799 | -2.05847 |
| Exosc1        | NM_025644    | 0.00013505  | 0.731731 | -1.36662 | 6.18E-07    | 0.483579 | -2.06791 |
| Ddx20         | NM_017397    | 5.88E-05    | 0.664253 | -1.50545 | 0.000118814 | 0.482966 | -2.07054 |
| Ebf1          | NM_007897    | 4.34E-06    | 0.647185 | -1.54515 | 3.06E-05    | 0.482225 | -2.07372 |
| Dlc1          | NM_015802    | 4.50E-12    | 0.428928 | -2.3314  | 6.83E-06    | 0.480199 | -2.08247 |
| Noc3l         | NM_021315    | 0.000234904 | 0.631133 | -1.58445 | 9.64E-07    | 0.479413 | -2.08588 |
| Mphosph10     | NM_026483    | 5.82E-06    | 0.640967 | -1.56014 | 1.67E-06    | 0.47855  | -2.08964 |
| Igf2bp1       | NM_009951    | 1.15E-06    | 0.557613 | -1.79336 | 0.00020326  | 0.476173 | -2.10008 |
| Espl1         | NM_001014976 | 0.000224552 | 0.658452 | -1.51871 | 2.91E-05    | 0.476151 | -2.10017 |
| Plekhf1       | NM_024413    | 7.34E-05    | 0.446888 | -2.2377  | 8.99E-05    | 0.475975 | -2.10095 |
| Tpx2          | NM_001141977 | 0.000235555 | 0.738345 | -1.35438 | 8.15E-06    | 0.474527 | -2.10736 |
| Anln          | NM_028390    | 0.00031155  | 0.740825 | -1.34985 | 0.00012142  | 0.474109 | -2.10922 |
| Zmym3         | NM_001177985 | 2.61E-07    | 0.374461 | -2.6705  | 0.000541567 | 0.473496 | -2.11195 |
| Troap         | NM_030159    | 4.71E-06    | 0.683091 | -1.46393 | 4.62E-05    | 0.472383 | -2.11693 |
| Wdr43         | NM_175639    | 1.38E-06    | 0.703856 | -1.42075 | 2.77E-08    | 0.471865 | -2.11925 |
| Sgol2         | NM_199007    | 9.90E-06    | 0.591941 | -1.68936 | 0.000345087 | 0.471108 | -2.12266 |
| Syncrip       | NM_019796    | 3.93E-05    | 0.61557  | -1.62451 | 1.45E-06    | 0.470991 | -2.12318 |
| Wdr75         | NM_028599    | 3.11E-08    | 0.572113 | -1.74791 | 2.58E-07    | 0.470386 | -2.12591 |
| Fpgs          | NM_010236    | 0.000180522 | 0.652644 | -1.53223 | 2.58E-06    | 0.469361 | -2.13056 |
| Exosc2        | NM_144886    | 2.65E-07    | 0.666855 | -1.49958 | 2.12E-05    | 0.468423 | -2.13482 |
| Bend3         | NM_199028    | 7.38E-06    | 0.395184 | -2.53047 | 7.27E-05    | 0.466179 | -2.1451  |
| Fkbp5         | NM_010220    | 1.07E-07    | 0.581077 | -1.72094 | 1.87E-05    | 0.465508 | -2.14819 |
| Hmgb2         | NM_008252    | 0.000884696 | 0.679555 | -1.47155 | 0.000315231 | 0.465079 | -2.15017 |
| Slc29a2       | NM_007854    | 6.59E-05    | 0.684501 | -1.46092 | 2.18E-06    | 0.461542 | -2.16665 |
| Mboat1        | NM_153546    | 0.000375225 | 0.62475  | -1.60064 | 5.47E-05    | 0.461235 | -2.16809 |
| Atxn7l3       | NM_001098836 | 4.56E-06    | 0.619004 | -1.6155  | 1.78E-07    | 0.459602 | -2.17579 |
| Slc25a12      | NM_172436    | 1.42E-07    | 0.568054 | -1.7604  | 3.60E-05    | 0.459265 | -2.17739 |
| Stard4        | NM_133774    | 0.000808354 | 0.684141 | -1.46169 | 8.72E-05    | 0.458678 | -2.18018 |
| Ptch1         | NM_008957    | 1.87E-09    | 0.337889 | -2.95955 | 5.82E-05    | 0.45847  | -2.18117 |
| Qtrtd1        | NM_029128    | 0.000179858 | 0.675195 | -1.48105 | 1.15E-06    | 0.455663 | -2.1946  |
| 1500012F01Rik | NM_001081005 | 0.00094708  | 0.830768 | -1.20371 | 3.97E-07    | 0.455033 | -2.19764 |
| Pcbp4         | NM_021567    | 3.21E-09    | 0.372942 | -2.68138 | 7.53E-05    | 0.454927 | -2.19816 |
| Eif4b         | NM_145625    | 2.26E-05    | 0.798967 | -1.25162 | 1.15E-07    | 0.454767 | -2.19893 |
| Ect2          | NM_007900    | 1.28E-06    | 0.59383  | -1.68398 | 0.000158882 | 0.454148 | -2.20192 |
| Hells         | NM_008234    | 1.37E-05    | 0.606339 | -1.64924 | 0.000146291 | 0.453609 | -2.20454 |
| Tom1l1        | NM_028011    | 4.08E-05    | 0.645159 | -1.55001 | 0.000109789 | 0.452955 | -2.20772 |
| Kat2a         | NM_001038010 | 0.000332744 | 1.20808  | 1.20808  | 1.22E-07    | 0.449728 | -2.22357 |
| Skp2          | NM_145468    | 8.57E-08    | 0.658291 | -1.51909 | 3.14E-07    | 0.449723 | -2.22359 |
| Sephs1        | NM_175400    | 1.97E-07    | 0.51997  | -1.92319 | 4.72E-07    | 0.449713 | -2.22364 |
| Prc1          | NM_145150    | 4.49E-07    | 0.5849   | -1.70969 | 9.14E-05    | 0.448608 | -2.22912 |

|           |              |             |          |          |             |          |          |
|-----------|--------------|-------------|----------|----------|-------------|----------|----------|
| B3gnt5    | NM_001159407 | 2.96E-05    | 0.421543 | -2.37224 | 0.000190832 | 0.446239 | -2.24095 |
| Srfbp1    | NM_026040    | 0.000229563 | 0.715953 | -1.39674 | 8.05E-06    | 0.438996 | -2.27793 |
| Nrm       | NM_134122    | 5.80E-08    | 0.498155 | -2.00741 | 4.23E-05    | 0.438523 | -2.28038 |
| Cdkn1b    | NM_009875    | 7.24E-07    | 0.44707  | -2.23679 | 1.66E-05    | 0.43708  | -2.28791 |
| Suv39h1   | NM_011514    | 0.000918658 | 1.19533  | -1.19533 | 6.55E-05    | 0.435029 | -2.2987  |
| Bysl      | NM_016859    | 4.05E-05    | 0.648157 | -1.54284 | 9.50E-07    | 0.434914 | -2.29931 |
| Gm12387   | XR_032698    | 0.000363755 | 0.593633 | -1.68454 | 3.89E-05    | 0.433042 | -2.30924 |
| Ccnb1     | NM_172301    | 0.00067564  | 0.797553 | -1.25384 | 0.000968317 | 0.432158 | -2.31397 |
| Prkg2     | NM_008926    | 0.000547834 | 0.773121 | -1.29346 | 4.46E-06    | 0.428797 | -2.3321  |
| Atad2     | NM_027435    | 0.000128103 | 0.701132 | -1.42627 | 8.69E-06    | 0.426236 | -2.34612 |
| Wdr77     | NM_027432    | 2.33E-06    | 0.668063 | -1.49686 | 1.23E-07    | 0.425274 | -2.35143 |
| Lmnbl     | NM_010721    | 1.42E-07    | 0.562413 | -1.77805 | 5.54E-06    | 0.424426 | -2.35612 |
| Tcof1     | NM_011552    | 1.69E-06    | 0.650716 | -1.53677 | 7.67E-07    | 0.421457 | -2.37272 |
| Ccne1     | NM_007633    | 3.00E-08    | 0.521035 | -1.91926 | 9.45E-06    | 0.420908 | -2.37581 |
| Nusap1    | NM_133851    | 8.03E-08    | 0.547845 | -1.82533 | 3.82E-05    | 0.419918 | -2.38142 |
| Urb2      | NM_001029876 | 3.63E-08    | 0.460358 | -2.17222 | 4.93E-07    | 0.419686 | -2.38274 |
| Pold2     | NM_008894    | 0.000171422 | 0.669888 | -1.49279 | 0.000175482 | 0.419225 | -2.38536 |
| Tsply2    | NM_029836    | 5.90E-05    | 0.545121 | -1.83445 | 1.95E-06    | 0.413764 | -2.41684 |
| lqgap3    | NM_001033484 | 8.93E-05    | 0.745718 | -1.34099 | 3.87E-05    | 0.413416 | -2.41887 |
| Cdca5     | NM_026410    | 9.46E-05    | 0.683125 | -1.46386 | 0.000117567 | 0.412527 | -2.42408 |
| Clcn6     | NM_011929    | 3.94E-05    | 0.594668 | -1.68161 | 2.45E-05    | 0.412501 | -2.42424 |
| Pprc1     | NM_001081214 | 2.24E-05    | 0.599789 | -1.66725 | 4.87E-07    | 0.411049 | -2.4328  |
| Dpagt1    | NM_007875    | 1.31E-05    | 0.525721 | -1.90215 | 1.25E-05    | 0.40849  | -2.44804 |
| Nop58     | NM_018868    | 1.75E-06    | 0.575474 | -1.7377  | 2.82E-09    | 0.407346 | -2.45491 |
| Enpp4     | NM_199016    | 5.21E-05    | 0.636391 | -1.57136 | 9.08E-06    | 0.403512 | -2.47824 |
| Snord52   | NR_028527    | 9.22E-05    | 0.562151 | -1.77888 | 1.85E-05    | 0.399994 | -2.50004 |
| Hist1h2ab | NM_175660    | 5.61E-06    | 0.277584 | -3.60251 | 0.000208543 | 0.398838 | -2.50728 |
| Shmt1     | NM_009171    | 3.24E-05    | 0.640296 | -1.56178 | 9.73E-07    | 0.397696 | -2.51448 |
| Ncapd2    | NM_146171    | 6.04E-05    | 0.664609 | -1.50464 | 1.80E-06    | 0.392791 | -2.54588 |
| Usp1      | NM_146144    | 0.00033386  | 0.558397 | -1.79084 | 3.31E-06    | 0.390753 | -2.55916 |
| Cyp51     | NM_020010    | 5.31E-05    | 0.559461 | -1.78744 | 7.50E-05    | 0.389865 | -2.56499 |
| Vprbp     | NM_001015507 | 3.29E-05    | 0.712979 | -1.40257 | 5.11E-06    | 0.38862  | -2.57321 |
| Plk1      | NM_011121    | 5.81E-09    | 0.431915 | -2.31527 | 3.06E-05    | 0.382259 | -2.61603 |
| Wdr76     | NM_030234    | 1.30E-07    | 0.642578 | -1.55623 | 3.81E-07    | 0.381162 | -2.62355 |
| Kif20a    | NM_001166406 | 5.59E-06    | 0.689429 | -1.45048 | 3.71E-06    | 0.380769 | -2.62627 |
| Smyd5     | NM_144918    | 0.000126854 | 0.624301 | -1.60179 | 1.48E-06    | 0.376812 | -2.65385 |
| Ccdc102a  | NM_001033533 | 9.28E-07    | 0.601124 | -1.66355 | 2.46E-06    | 0.376754 | -2.65425 |
| Cbx3      | NM_007624    | 2.94E-05    | 0.600804 | -1.66444 | 4.43E-06    | 0.368684 | -2.71235 |
| Gjb3      | NM_008126    | 1.87E-07    | 0.399143 | -2.50537 | 3.50E-06    | 0.366537 | -2.72824 |
| Mthfd2    | NM_008638    | 6.22E-07    | 0.484895 | -2.0623  | 3.00E-05    | 0.362047 | -2.76207 |
| Asxl1     | NM_001039939 | 3.71E-05    | 0.615336 | -1.62513 | 2.03E-07    | 0.361797 | -2.76398 |
| Pbk       | NM_023209    | 6.18E-06    | 0.493755 | -2.0253  | 2.55E-05    | 0.361049 | -2.76971 |
| Snx24     | NM_029394    | 5.56E-06    | 0.440807 | -2.26857 | 1.54E-05    | 0.359093 | -2.78479 |

|            |              |             |          |          |             |          |          |
|------------|--------------|-------------|----------|----------|-------------|----------|----------|
| Hist1h1a   | NM_030609    | 3.00E-07    | 0.619106 | -1.61523 | 5.20E-05    | 0.349901 | -2.85795 |
| E2f8       | NM_001013368 | 1.94E-07    | 0.620774 | -1.61089 | 0.000118019 | 0.341993 | -2.92404 |
| Oip5       | NM_001042653 | 0.000746355 | 0.484021 | -2.06603 | 5.33E-05    | 0.332151 | -3.01068 |
| Arhgap19   | NM_027667    | 1.83E-06    | 0.636465 | -1.57118 | 2.10E-06    | 0.328067 | -3.04816 |
| Trib2      | NM_144551    | 4.23E-06    | 1.55995  | -1.55995 | 7.79E-06    | 0.325397 | -3.07317 |
| Ddah2      | NM_016765    | 1.97E-10    | 0.343448 | -2.91165 | 1.90E-05    | 0.32413  | -3.08518 |
| Kif14      | NM_001081258 | 0.000885292 | 0.697109 | -1.4345  | 5.94E-06    | 0.323613 | -3.09011 |
| Polr3g     | NM_001081176 | 5.34E-05    | 0.586453 | -1.70517 | 7.54E-06    | 0.321643 | -3.10904 |
| Prr11      | NM_175563    | 1.26E-06    | 0.575905 | -1.7364  | 5.46E-06    | 0.309264 | -3.23348 |
| Cdca7l     | NM_146040    | 0.000793592 | 0.734217 | -1.36199 | 4.08E-07    | 0.308677 | -3.23963 |
| Fam60a     | NM_019643    | 1.07E-07    | 0.450564 | -2.21944 | 2.21E-07    | 0.307664 | -3.2503  |
| Kif4       | NM_008446    | 6.10E-05    | 0.550755 | -1.81569 | 5.61E-05    | 0.303607 | -3.29373 |
| Tbl2       | NM_013763    | 7.03E-09    | 0.503419 | -1.98642 | 3.77E-07    | 0.30173  | -3.31422 |
| Cdca7      | NM_025866    | 1.66E-05    | 0.676605 | -1.47797 | 9.50E-06    | 0.297877 | -3.35709 |
| D4Bwg0951e | BC030404     | 0.000775172 | 0.578783 | -1.72776 | 1.96E-05    | 0.290364 | -3.44395 |
| Nop56      | NM_024193    | 2.64E-07    | 0.563678 | -1.77406 | 6.08E-08    | 0.287885 | -3.47361 |
| Wrb        | NM_207301    | 3.31E-05    | 0.608307 | -1.64391 | 2.27E-07    | 0.283942 | -3.52184 |
| Hk2        | NM_013820    | 2.99E-06    | 0.440343 | -2.27096 | 1.24E-08    | 0.282627 | -3.53823 |
| Fbxo5      | NM_025995    | 7.91E-06    | 0.460977 | -2.16931 | 1.26E-05    | 0.282168 | -3.54399 |
| Gas5       | NR_002840    | 2.75E-05    | 0.703798 | -1.42086 | 8.02E-05    | 0.277741 | -3.60048 |
| Dkc1       | NM_001030307 | 4.60E-06    | 0.63341  | -1.57876 | 2.41E-07    | 0.27729  | -3.60633 |
| Ppat       | NM_172146    | 3.90E-06    | 0.607983 | -1.64478 | 5.92E-09    | 0.269471 | -3.71097 |
| Cenpf      | NM_001081363 | 2.00E-05    | 0.564058 | -1.77287 | 1.15E-06    | 0.267342 | -3.74052 |
| Fam64a     | NM_144526    | 9.86E-08    | 0.492452 | -2.03066 | 1.71E-05    | 0.261779 | -3.82001 |
| Kif2c      | NM_134471    | 5.46E-07    | 0.659194 | -1.517   | 4.00E-05    | 0.260823 | -3.83402 |
| Racgap1    | NM_012025    | 1.03E-07    | 0.499836 | -2.00065 | 9.19E-06    | 0.259766 | -3.84961 |
| Myc        | NM_010849    | 2.97E-07    | 0.561635 | -1.78052 | 2.47E-07    | 0.249729 | -4.00434 |
| Nfib       | NM_001113209 | 1.48E-06    | 0.284052 | -3.52048 | 4.77E-06    | 0.209931 | -4.76347 |

**Supplementary Table 2**

| Gene Symbol   | RefSeq       | p-value(p53wt, Adr vs. p53wt, Ctr) | Ratio(p53wt, Adr vs. p53wt, Ctr) | Fold-Change(p53wt, Adr vs. p53wt, Ctr) |
|---------------|--------------|------------------------------------|----------------------------------|----------------------------------------|
| Vnn1          | NM_011704    | 2.81E-08                           | 18.8559                          | 18.8559                                |
| Lynx1         | NM_011838    | 2.31E-08                           | 9.45909                          | 9.45909                                |
| Bnc1          | NM_007562    | 8.10E-09                           | 9.05853                          | 9.05853                                |
| Nudt11        | NM_021431    | 3.34E-05                           | 8.34066                          | 8.34066                                |
| Icam1         | NM_010493    | 7.84E-07                           | 6.42156                          | 6.42156                                |
| Fam180a       | BC064033     | 4.23E-06                           | 6.26339                          | 6.26339                                |
| Klhdc1        | NM_178253    | 7.23E-07                           | 6.06887                          | 6.06887                                |
| Tmem22        | NM_001101483 | 6.54E-07                           | 5.81847                          | 5.81847                                |
| Car5b         | NM_181315    | 9.33E-09                           | 5.28407                          | 5.28407                                |
| Slc40a1       | NM_016917    | 1.15E-05                           | 5.28116                          | 5.28116                                |
| Orai2         | NM_178751    | 1.13E-07                           | 4.92271                          | 4.92271                                |
| Esr2          | NM_207707    | 8.28E-08                           | 4.60834                          | 4.60834                                |
| S100a7a       | NM_199422    | 9.06E-06                           | 4.58944                          | 4.58944                                |
| F11r          | NM_172647    | 5.66E-07                           | 4.5607                           | 4.5607                                 |
| Rnf213        | AK173199     | 2.92E-06                           | 4.54579                          | 4.54579                                |
| 2810055F11Rik | NM_026038    | 9.83E-09                           | 4.53158                          | 4.53158                                |
| Crot          | NM_023733    | 1.04E-08                           | 4.32223                          | 4.32223                                |
| Dennd2c       | NM_177857    | 1.13E-06                           | 4.26195                          | 4.26195                                |
| Mreg          | NM_001005423 | 3.48E-09                           | 4.18771                          | 4.18771                                |
| Pitpnc1       | NM_145823    | 4.47E-07                           | 4.08069                          | 4.08069                                |
| Dusp28        | NM_175118    | 1.99E-08                           | 3.6653                           | 3.6653                                 |
| Cops3         | NM_011991    | 7.73E-08                           | 3.63408                          | 3.63408                                |
| Areg          | NM_009704    | 1.92E-07                           | 3.61892                          | 3.61892                                |
| Tcp11l2       | NM_146008    | 2.29E-05                           | 3.59165                          | 3.59165                                |
| Klrg2         | NM_001033171 | 7.56E-07                           | 3.59121                          | 3.59121                                |
| Cd14          | NM_009841    | 4.05E-07                           | 3.44966                          | 3.44966                                |
| Gdf6          | NM_013526    | 3.72E-05                           | 3.42935                          | 3.42935                                |
| Ldhb          | NM_008492    | 3.35E-06                           | 3.42052                          | 3.42052                                |
| Ifi30         | NM_023065    | 1.68E-09                           | 3.38258                          | 3.38258                                |
| Has3          | NM_008217    | 6.24E-09                           | 3.35188                          | 3.35188                                |
| Ankrd13d      | NM_026720    | 7.41E-07                           | 3.33401                          | 3.33401                                |
| Nanos1        | NM_178421    | 2.82E-08                           | 3.29215                          | 3.29215                                |
| Glt8d2        | NM_029102    | 1.30E-05                           | 3.29111                          | 3.29111                                |
| Gm16516       | NR_027800    | 2.46E-09                           | 3.26784                          | 3.26784                                |
| Sfmbt1        | NM_019460    | 7.86E-09                           | 3.21874                          | 3.21874                                |
| Fam70a        | NM_172930    | 2.62E-05                           | 3.15333                          | 3.15333                                |
| Pml           | NM_178087    | 9.17E-08                           | 3.12                             | 3.12                                   |
| Efna1         | NM_010107    | 9.97E-05                           | 3.02747                          | 3.02747                                |
| Agpat5        | NM_026792    | 7.33E-07                           | 3.01391                          | 3.01391                                |
| Bmp8a         | NM_007558    | 2.67E-07                           | 3.00931                          | 3.00931                                |
| Lass4         | NM_026058    | 1.43E-07                           | 3.0076                           | 3.0076                                 |

|               |              |             |         |         |
|---------------|--------------|-------------|---------|---------|
| Fam49a        | NM_029758    | 0.00020255  | 3.00426 | 3.00426 |
| Hagh          | NM_024284    | 6.36E-09    | 2.99946 | 2.99946 |
| Krt19         | NM_008471    | 0.000111013 | 2.95405 | 2.95405 |
| Pigf          | NM_008838    | 3.67E-08    | 2.95093 | 2.95093 |
| Nsun7         | NM_027602    | 3.77E-08    | 2.9419  | 2.9419  |
| Nfkbie        | NM_008690    | 6.55E-06    | 2.94068 | 2.94068 |
| Cdk19         | NM_001168304 | 1.80E-08    | 2.93655 | 2.93655 |
| C77370        | DQ975302     | 5.45E-05    | 2.90278 | 2.90278 |
| Tshr          | NM_011648    | 1.98E-05    | 2.89045 | 2.89045 |
| Itga6         | NM_008397    | 0.000385691 | 2.88605 | 2.88605 |
| Mmp28         | NM_080453    | 1.92E-07    | 2.85814 | 2.85814 |
| Ifnz          | NM_197889    | 8.93E-06    | 2.85074 | 2.85074 |
| 4432412L15Rik | NM_028877    | 3.40E-06    | 2.83573 | 2.83573 |
| 2010011I20Rik | NM_025912    | 1.60E-05    | 2.81517 | 2.81517 |
| Etfdh         | NM_025794    | 2.99E-08    | 2.78924 | 2.78924 |
| Dgat2         | NM_026384    | 3.32E-06    | 2.78639 | 2.78639 |
| Adssl1        | NM_007421    | 1.64E-06    | 2.77489 | 2.77489 |
| Cetn4         | NM_145825    | 2.49E-05    | 2.76458 | 2.76458 |
| Lrrc39        | NM_175413    | 0.000111739 | 2.7635  | 2.7635  |
| Rpe           | NM_025683    | 8.45E-07    | 2.75331 | 2.75331 |
| Efna3         | NM_010108    | 2.71E-06    | 2.75073 | 2.75073 |
| Tnfrsf23      | NM_024290    | 3.01E-05    | 2.74501 | 2.74501 |
| Spint1        | NM_016907    | 1.70E-06    | 2.73078 | 2.73078 |
| Gm13271       | NM_001085528 | 2.55E-07    | 2.72636 | 2.72636 |
| Cda           | NM_028176    | 1.32E-05    | 2.72498 | 2.72498 |
| Ypel3         | NM_026875    | 1.57E-07    | 2.7152  | 2.7152  |
| 9030625A04Rik | BC116748     | 6.71E-05    | 2.70293 | 2.70293 |
| Plcx2         | NM_001134480 | 0.00012733  | 2.64458 | 2.64458 |
| Slc9a2        | NM_001033289 | 0.000182486 | 2.62143 | 2.62143 |
| Ralgds        | NM_001145835 | 2.67E-05    | 2.60394 | 2.60394 |
| D330028D13Rik | NM_172727    | 3.74E-05    | 2.59065 | 2.59065 |
| Crat          | NM_007760    | 4.14E-07    | 2.56607 | 2.56607 |
| Jup           | NM_010593    | 0.000621924 | 2.54854 | 2.54854 |
| Slc25a40      | NM_178766    | 7.62E-06    | 2.54567 | 2.54567 |
| Ern1          | NM_023913    | 6.86E-06    | 2.53678 | 2.53678 |
| Deb1          | NM_026794    | 3.87E-07    | 2.52896 | 2.52896 |
| Unc13c        | NM_001081153 | 0.000145478 | 2.52378 | 2.52378 |
| Tnfrsf26      | NM_175649    | 5.58E-06    | 2.52159 | 2.52159 |
| Klhl24        | NM_029436    | 0.000124734 | 2.51974 | 2.51974 |
| AK129341      | BC119072     | 2.01E-08    | 2.5194  | 2.5194  |
| Scn4b         | NM_001013390 | 0.000217969 | 2.51746 | 2.51746 |
| Rab15         | NM_134050    | 1.60E-07    | 2.51602 | 2.51602 |
| Pias3         | NM_146135    | 8.06E-05    | 2.50665 | 2.50665 |

|               |                    |             |         |         |
|---------------|--------------------|-------------|---------|---------|
| Acadvl        | NM_017366          | 4.28E-07    | 2.50447 | 2.50447 |
| Fbxo33        | NM_001033156       | 5.74E-07    | 2.50363 | 2.50363 |
| Thyn1         | NM_144543          | 2.62E-06    | 2.49991 | 2.49991 |
| Decr2         | NM_011933          | 4.70E-05    | 2.48189 | 2.48189 |
| Dcbld1        | NM_025705          | 6.04E-06    | 2.46905 | 2.46905 |
| Ntn4          | NM_021320          | 6.73E-06    | 2.42785 | 2.42785 |
| B630005N14Rik | NM_175312          | 5.11E-07    | 2.4112  | 2.4112  |
| Abtb1         | NM_030251          | 7.73E-06    | 2.39459 | 2.39459 |
| Frmd8         | NM_026169          | 9.85E-06    | 2.38538 | 2.38538 |
| Gdf15         | NM_011819          | 3.07E-05    | 2.36668 | 2.36668 |
| Endod1        | NM_028013          | 2.84E-05    | 2.36364 | 2.36364 |
| Ifitm3        | NM_025378          | 0.000313402 | 2.36301 | 2.36301 |
| 1810020D17Rik | NM_001177945       | 2.45E-05    | 2.3566  | 2.3566  |
| Fgfbp3        | NM_028263          | 5.19E-08    | 2.35353 | 2.35353 |
| Armc7         | NM_177778          | 5.93E-07    | 2.34872 | 2.34872 |
| Sh3bgrl3      | NM_080559          | 1.66E-07    | 2.34225 | 2.34225 |
| Tmem184c      | NM_145599          | 3.08E-06    | 2.34077 | 2.34077 |
| Gm9949        | ENSMUST00000067743 | 2.01E-07    | 2.34027 | 2.34027 |
| 2610301B20Rik | NM_026005          | 6.35E-07    | 2.33895 | 2.33895 |
| Kcnj15        | NM_019664          | 1.57E-05    | 2.32498 | 2.32498 |
| Ppp1r12b      | NM_001081307       | 7.09E-06    | 2.30822 | 2.30822 |
| Ggta1         | NM_010283          | 4.89E-07    | 2.30486 | 2.30486 |
| Msh6          | NM_010830          | 1.80E-05    | 2.3037  | 2.3037  |
| Rapgef3       | NM_001177810       | 5.85E-08    | 2.29865 | 2.29865 |
| Antxr2        | NM_133738          | 1.34E-05    | 2.29239 | 2.29239 |
| Cyb561        | NM_007805          | 2.15E-06    | 2.28294 | 2.28294 |
| Rhbdf2        | NM_172572          | 9.59E-06    | 2.28115 | 2.28115 |
| Eno2          | NM_013509          | 3.07E-07    | 2.27531 | 2.27531 |
| Rab43         | NM_001039394       | 1.15E-05    | 2.27512 | 2.27512 |
| Loxl4         | NM_001164311       | 2.76E-06    | 2.27342 | 2.27342 |
| Esrp2         | NM_176838          | 1.38E-05    | 2.27229 | 2.27229 |
| Pold4         | NM_027196          | 8.48E-05    | 2.27062 | 2.27062 |
| Gm4979        | NM_001142411       | 1.34E-05    | 2.27024 | 2.27024 |
| 6330416L07Rik | NM_176962          | 6.17E-06    | 2.26312 | 2.26312 |
| Zcchc11       | NM_175472          | 4.81E-05    | 2.26239 | 2.26239 |
| Ptgr2         | NM_029880          | 1.41E-05    | 2.25124 | 2.25124 |
| Arhgef19      | NM_172520          | 2.10E-05    | 2.25052 | 2.25052 |
| Irf5          | NM_012057          | 6.70E-06    | 2.24985 | 2.24985 |
| Plekha7       | NM_172743          | 6.06E-07    | 2.24741 | 2.24741 |
| Flt3l         | NM_013520          | 1.08E-05    | 2.23751 | 2.23751 |
| Abcb9         | NM_019875          | 1.97E-07    | 2.23672 | 2.23672 |
| Ephb6         | NM_001146351       | 4.58E-05    | 2.23588 | 2.23588 |
| Plk1s1        | NM_001033298       | 4.87E-05    | 2.23451 | 2.23451 |

|                |              |             |         |         |
|----------------|--------------|-------------|---------|---------|
| Srxn1          | NM_029688    | 1.14E-05    | 2.22147 | 2.22147 |
| Tmbim4         | NM_026617    | 3.33E-09    | 2.2207  | 2.2207  |
| 2310047M10Rik  | NM_028005    | 2.90E-05    | 2.21745 | 2.21745 |
| R74862         | NR_015529    | 0.000189636 | 2.21691 | 2.21691 |
| Aox1           | NM_009676    | 4.90E-06    | 2.20962 | 2.20962 |
| Ogfr1          | NM_001081079 | 9.96E-06    | 2.20289 | 2.20289 |
| Calhm2         | NM_133746    | 1.68E-05    | 2.2022  | 2.2022  |
| Bcam           | NM_020486    | 1.56E-06    | 2.19554 | 2.19554 |
| Wdr61          | NM_001025375 | 5.58E-06    | 2.18023 | 2.18023 |
| Bmp2           | NM_007553    | 4.43E-05    | 2.17964 | 2.17964 |
| Zfp219         | NM_027248    | 4.95E-07    | 2.17686 | 2.17686 |
| 4833427G06Rik  | BC048587     | 4.36E-06    | 2.17346 | 2.17346 |
| Hsd17b4        | NM_008292    | 5.93E-06    | 2.16899 | 2.16899 |
| Eed            | NM_021876    | 4.99E-07    | 2.16793 | 2.16793 |
| Dpyd           | NM_170778    | 3.27E-05    | 2.16762 | 2.16762 |
| Pion           | NM_175437    | 3.11E-05    | 2.16454 | 2.16454 |
| Edem1          | NM_138677    | 2.47E-07    | 2.16276 | 2.16276 |
| Rapgef6        | NM_175258    | 1.06E-05    | 2.15777 | 2.15777 |
| Gatsl3         | NM_028022    | 0.000340568 | 2.15199 | 2.15199 |
| Mocs1          | NM_020042    | 3.15E-05    | 2.14407 | 2.14407 |
| Lrfn3          | NM_175478    | 6.76E-05    | 2.14159 | 2.14159 |
| Krtap3-2       | NM_025720    | 1.40E-06    | 2.13783 | 2.13783 |
| Slc29a3        | NM_023596    | 1.50E-06    | 2.13687 | 2.13687 |
| Tmem141        | NM_001109993 | 2.39E-07    | 2.12963 | 2.12963 |
| Lpcat3         | NM_145130    | 2.78E-06    | 2.12437 | 2.12437 |
| Trim21         | NM_009277    | 1.59E-06    | 2.11879 | 2.11879 |
| Zfp707         | NM_001081065 | 7.27E-06    | 2.10995 | 2.10995 |
| Cpt2           | NM_009949    | 7.92E-05    | 2.10901 | 2.10901 |
| Slc5a8         | NM_145423    | 0.000206556 | 2.09509 | 2.09509 |
| Hist1h2ac      | NM_178189    | 1.95E-05    | 2.08841 | 2.08841 |
| Al837181       | NR_024189    | 3.76E-07    | 2.08678 | 2.08678 |
| Crebl2         | NM_177687    | 4.62E-06    | 2.08615 | 2.08615 |
| Abcc5          | NM_013790    | 0.000801167 | 2.07973 | 2.07973 |
| Vwa5a          | NM_172767    | 0.000433459 | 2.07588 | 2.07588 |
| Ube2h          | NM_009459    | 3.45E-05    | 2.07331 | 2.07331 |
| Syap1          | NM_025932    | 2.34E-07    | 2.0733  | 2.0733  |
| Cdkl5          | NM_001024624 | 6.31E-08    | 2.07075 | 2.07075 |
| Erich1         | NM_001034862 | 6.15E-05    | 2.06776 | 2.06776 |
| 1700047I17Rik1 | BC049669     | 3.09E-05    | 2.06605 | 2.06605 |
| Atp11c         | NM_001037863 | 1.51E-06    | 2.06426 | 2.06426 |
| Pla2g6         | NM_016915    | 4.26E-07    | 2.0617  | 2.0617  |
| Plekhg4        | NM_001081333 | 2.11E-05    | 2.06077 | 2.06077 |
| Rom1           | NM_009073    | 2.47E-05    | 2.0555  | 2.0555  |



|               |              |             |         |         |
|---------------|--------------|-------------|---------|---------|
| Sh3d20        | NM_183288    | 1.45E-06    | 2.05478 | 2.05478 |
| Zfp456        | NM_001001186 | 1.77E-06    | 2.05338 | 2.05338 |
| Galnt3        | NM_015736    | 0.000358223 | 2.05232 | 2.05232 |
| Oplah         | NM_153122    | 9.27E-06    | 2.05009 | 2.05009 |
| Jhdm1d        | NM_001033430 | 0.000329049 | 2.04866 | 2.04866 |
| Ppef1         | NM_011147    | 0.000362177 | 2.04356 | 2.04356 |
| BC005624      | NM_144885    | 4.34E-07    | 2.03924 | 2.03924 |
| Irak3         | NM_028679    | 7.49E-07    | 2.03779 | 2.03779 |
| Sft2d2        | NM_145512    | 6.65E-07    | 2.037   | 2.037   |
| Mtmr1         | NM_016985    | 2.30E-07    | 2.03652 | 2.03652 |
| Xkr8          | NM_201368    | 6.55E-06    | 2.0358  | 2.0358  |
| Mfsd6         | NM_133829    | 7.34E-06    | 2.02308 | 2.02308 |
| Nsmaf         | NM_010945    | 2.33E-05    | 2.02248 | 2.02248 |
| Alas1         | NM_020559    | 7.48E-05    | 2.01979 | 2.01979 |
| Golga7        | NM_020585    | 4.17E-07    | 2.01721 | 2.01721 |
| Glud1         | NM_008133    | 9.48E-07    | 2.01682 | 2.01682 |
| lpmk          | NM_027184    | 8.24E-07    | 2.00696 | 2.00696 |
| Mri1          | NM_026423    | 2.18E-07    | 2.00591 | 2.00591 |
| Rassf3        | NM_138956    | 1.63E-05    | 2.00459 | 2.00459 |
| Fgf13         | NM_010200    | 1.00E-05    | 2.00264 | 2.00264 |
| Slc35e3       | NM_029875    | 0.000466215 | 2.00132 | 2.00132 |
| Cep164        | NM_001081373 | 2.57E-05    | 1.99953 | 1.99953 |
| Nat9          | NM_025400    | 3.94E-05    | 1.99496 | 1.99496 |
| Tmem229b      | NM_178745    | 1.68E-06    | 1.99348 | 1.99348 |
| Leng1         | NM_027203    | 1.96E-05    | 1.98949 | 1.98949 |
| Rai2          | NM_198409    | 0.00034221  | 1.98496 | 1.98496 |
| Dusp2         | NM_010090    | 3.76E-05    | 1.98456 | 1.98456 |
| Upf3b         | NM_026573    | 3.09E-05    | 1.97485 | 1.97485 |
| Ubac1         | NM_133835    | 1.05E-06    | 1.97463 | 1.97463 |
| Map2k3        | NM_008928    | 2.28E-05    | 1.96947 | 1.96947 |
| Akr1b8        | NM_008012    | 0.00022267  | 1.96126 | 1.96126 |
| Cln8          | NM_012000    | 2.08E-05    | 1.95544 | 1.95544 |
| Dexi          | NM_021428    | 2.32E-07    | 1.94879 | 1.94879 |
| Nfkb2         | NM_019408    | 3.57E-06    | 1.94666 | 1.94666 |
| Prcp          | NM_028243    | 9.50E-06    | 1.94196 | 1.94196 |
| Ifi35         | NM_027320    | 2.90E-05    | 1.93912 | 1.93912 |
| Ccs           | NM_016892    | 8.87E-06    | 1.93781 | 1.93781 |
| Fitm2         | NM_173397    | 3.75E-07    | 1.9318  | 1.9318  |
| Gm266         | NM_001033248 | 3.78E-05    | 1.93129 | 1.93129 |
| Dhh           | NM_007857    | 6.08E-07    | 1.92279 | 1.92279 |
| Cstb          | NM_007793    | 0.000319932 | 1.92128 | 1.92128 |
| A530054K11Rik | NM_183146    | 3.48E-06    | 1.92048 | 1.92048 |
| Ano5          | NM_177694    | 0.000120304 | 1.91988 | 1.91988 |

|               |              |             |         |         |
|---------------|--------------|-------------|---------|---------|
| Tnfaip2       | NM_009396    | 0.000226929 | 1.91555 | 1.91555 |
| Hmox1         | NM_010442    | 0.00044855  | 1.91529 | 1.91529 |
| Tspyl1        | NM_009433    | 3.83E-07    | 1.91269 | 1.91269 |
| Mafb          | NM_010658    | 8.20E-05    | 1.91065 | 1.91065 |
| Dnajb2        | NM_001159883 | 6.28E-07    | 1.90861 | 1.90861 |
| Ssx2ip        | NM_138744    | 6.50E-07    | 1.90816 | 1.90816 |
| Arvcf         | NM_033474    | 5.02E-06    | 1.90421 | 1.90421 |
| Larp6         | NM_026235    | 3.07E-05    | 1.90392 | 1.90392 |
| Kif13a        | NM_010617    | 2.27E-05    | 1.90372 | 1.90372 |
| Lgals8        | NM_018886    | 1.94E-05    | 1.90254 | 1.90254 |
| Spr           | NM_011467    | 1.71E-06    | 1.89818 | 1.89818 |
| Parg          | NM_011960    | 5.75E-07    | 1.89773 | 1.89773 |
| Casp7         | NM_007611    | 1.74E-06    | 1.89769 | 1.89769 |
| Hacl1         | NM_019975    | 1.03E-05    | 1.89368 | 1.89368 |
| Card10        | NM_130859    | 0.00023344  | 1.89139 | 1.89139 |
| Scx           | NM_198885    | 0.000787925 | 1.89098 | 1.89098 |
| Ttc23         | NM_025905    | 2.85E-05    | 1.89092 | 1.89092 |
| Fam55c        | NM_001134457 | 0.000112267 | 1.8847  | 1.8847  |
| Rint1         | NM_177323    | 5.97E-05    | 1.88422 | 1.88422 |
| Bet1l         | NM_018742    | 2.93E-06    | 1.88196 | 1.88196 |
| Spns1         | NM_023712    | 4.75E-07    | 1.88092 | 1.88092 |
| Mafk          | NM_010757    | 4.02E-05    | 1.87958 | 1.87958 |
| Agrn          | NM_021604    | 7.50E-05    | 1.87582 | 1.87582 |
| Tmem88        | NM_025915    | 0.000468002 | 1.87173 | 1.87173 |
| Chrd          | NM_009893    | 0.00020919  | 1.86487 | 1.86487 |
| Etnk1         | NM_029250    | 1.47E-05    | 1.86169 | 1.86169 |
| Morc4         | NM_029413    | 9.12E-06    | 1.86017 | 1.86017 |
| Sstr2         | NM_009217    | 6.14E-05    | 1.85699 | 1.85699 |
| Rab24         | NM_009000    | 4.10E-07    | 1.85167 | 1.85167 |
| Nek3          | NM_001162947 | 0.000230535 | 1.84986 | 1.84986 |
| Gm6829        | XM_892769    | 1.29E-08    | 1.84896 | 1.84896 |
| Mosc2         | NM_133684    | 0.000158407 | 1.84202 | 1.84202 |
| Pcbd1         | NM_025273    | 0.000258984 | 1.8404  | 1.8404  |
| Zfp423        | NM_033327    | 5.58E-05    | 1.8352  | 1.8352  |
| 2010002N04Rik | NM_134133    | 6.79E-06    | 1.82865 | 1.82865 |
| Gal3st4       | NM_001033416 | 6.52E-05    | 1.82751 | 1.82751 |
| Ndufb6        | NM_001033305 | 9.47E-07    | 1.82481 | 1.82481 |
| Fam82b        | NM_025476    | 0.000490403 | 1.82316 | 1.82316 |
| Stx11         | NM_029075    | 5.80E-06    | 1.81989 | 1.81989 |
| Ascl2         | NM_008554    | 9.27E-06    | 1.81254 | 1.81254 |
| Tk2           | NM_021028    | 4.99E-05    | 1.80911 | 1.80911 |
| Tubb2c        | NM_146116    | 2.91E-06    | 1.80887 | 1.80887 |
| Gpkow         | NM_173747    | 3.51E-05    | 1.80652 | 1.80652 |

|               |                |             |         |         |
|---------------|----------------|-------------|---------|---------|
| Hexb          | NM_010422      | 3.12E-05    | 1.80206 | 1.80206 |
|               | 2-三月 NM_145486 | 3.36E-05    | 1.80197 | 1.80197 |
| Cebpa         | NM_007678      | 6.80E-05    | 1.79926 | 1.79926 |
| Glrx5         | NM_028419      | 1.18E-05    | 1.79735 | 1.79735 |
| Tspan12       | NM_173007      | 0.000152556 | 1.79578 | 1.79578 |
| Eml5          | NM_001081191   | 0.000148754 | 1.79517 | 1.79517 |
| Glrp1         | NM_008132      | 8.00E-06    | 1.79263 | 1.79263 |
| Leo1          | NM_001039522   | 2.98E-07    | 1.79156 | 1.79156 |
| Spryd4        | NM_025716      | 0.000856664 | 1.7873  | 1.7873  |
| Uhmk1         | NM_010633      | 8.36E-06    | 1.78726 | 1.78726 |
| Snx2          | NM_026386      | 2.22E-05    | 1.78538 | 1.78538 |
| 2310057M21Rik | BC044749       | 3.35E-05    | 1.78381 | 1.78381 |
| Ercc1         | NM_007948      | 3.22E-07    | 1.78246 | 1.78246 |
| Zadh2         | NM_146090      | 5.24E-05    | 1.7802  | 1.7802  |
| Rnf135        | NM_028019      | 1.71E-05    | 1.77857 | 1.77857 |
| Stxbp6        | NM_144552      | 0.000163507 | 1.77701 | 1.77701 |
| Kif16b        | NM_001081133   | 0.000741134 | 1.77141 | 1.77141 |
| 1300014I06Rik | NM_025831      | 0.000269914 | 1.77033 | 1.77033 |
| Dolk          | NM_177648      | 1.15E-05    | 1.76759 | 1.76759 |
| AU042651      | NM_177809      | 5.35E-05    | 1.76663 | 1.76663 |
| Homez         | NM_183174      | 2.05E-05    | 1.76614 | 1.76614 |
| Gja3          | NM_016975      | 3.78E-05    | 1.76344 | 1.76344 |
| Clcn2         | NM_009900      | 2.16E-05    | 1.76152 | 1.76152 |
| Ppp2r3c       | NM_021529      | 0.000231908 | 1.7597  | 1.7597  |
| Ankrd10       | NR_030779      | 2.66E-06    | 1.75375 | 1.75375 |
| Ank1          | NM_001110783   | 7.47E-05    | 1.74763 | 1.74763 |
| Krit1         | NR_033173      | 0.000265523 | 1.74534 | 1.74534 |
| Scamp1        | NM_029153      | 0.000863616 | 1.745   | 1.745   |
| Rnf215        | NM_027859      | 3.95E-05    | 1.74176 | 1.74176 |
| Hhex          | NM_008245      | 0.000137321 | 1.74087 | 1.74087 |
| Zcchc2        | NM_001122676   | 1.63E-05    | 1.73218 | 1.73218 |
| Emd           | NM_007927      | 1.28E-05    | 1.73201 | 1.73201 |
| Fam71f1       | NM_207258      | 9.15E-07    | 1.73151 | 1.73151 |
| Fam135a       | NM_026604      | 6.22E-05    | 1.73113 | 1.73113 |
| C1galt1       | NM_052993      | 2.61E-06    | 1.72453 | 1.72453 |
| Josd2         | NM_025368      | 3.70E-06    | 1.72363 | 1.72363 |
| Fbrsl1        | NM_001142642   | 7.40E-05    | 1.72359 | 1.72359 |
| Auh           | NM_016709      | 0.000150509 | 1.72351 | 1.72351 |
| Osbpl6        | NM_145525      | 0.000186319 | 1.72314 | 1.72314 |
| Tmem35        | NM_026239      | 1.53E-05    | 1.72246 | 1.72246 |
| Fam131a       | BC092532       | 0.000218506 | 1.71862 | 1.71862 |
| Slc12a7       | NM_011390      | 2.45E-05    | 1.71816 | 1.71816 |
| Mak16         | NM_026453      | 2.60E-05    | 1.71094 | 1.71094 |

|               |                    |             |         |         |
|---------------|--------------------|-------------|---------|---------|
| Irak4         | NM_029926          | 0.000112912 | 1.70995 | 1.70995 |
| Foxo1         | NM_019739          | 0.000400779 | 1.7097  | 1.7097  |
| Cyth1         | NM_011180          | 7.78E-05    | 1.70792 | 1.70792 |
| Nat15         | NM_029090          | 1.09E-05    | 1.70762 | 1.70762 |
| Gldn          | NM_177350          | 0.000455483 | 1.7074  | 1.7074  |
| Ube2q2        | NM_180600          | 1.47E-05    | 1.7043  | 1.7043  |
| Tob1          | NM_009427          | 5.81E-07    | 1.70299 | 1.70299 |
| Pnrc1         | NM_001033225       | 3.12E-06    | 1.70292 | 1.70292 |
| Sccpdh        | NM_178653          | 0.000152326 | 1.69827 | 1.69827 |
| Mrps31        | NM_020560          | 5.69E-05    | 1.69154 | 1.69154 |
| Slc9a1        | NM_016981          | 4.16E-05    | 1.69147 | 1.69147 |
| Ubl3          | NM_011908          | 7.09E-07    | 1.68945 | 1.68945 |
| Adh5          | NM_007410          | 0.000500885 | 1.68894 | 1.68894 |
| Naa35         | NM_030153          | 3.09E-05    | 1.6888  | 1.6888  |
| Bsdc1         | NM_133889          | 3.42E-05    | 1.68781 | 1.68781 |
| Akr1b10       | NM_172398          | 0.000316744 | 1.68733 | 1.68733 |
| Tspan33       | NM_146173          | 1.44E-05    | 1.68604 | 1.68604 |
| Dusp8         | ENSMUST00000039926 | 0.00019519  | 1.683   | 1.683   |
| Rhbdl2        | NM_183163          | 0.000451834 | 1.68032 | 1.68032 |
| Zranb1        | NM_207302          | 2.09E-06    | 1.67845 | 1.67845 |
| Ubr3          | NM_001081548       | 1.06E-05    | 1.6774  | 1.6774  |
| Lonp2         | NM_025827          | 0.000113221 | 1.67643 | 1.67643 |
| Tyw1          | NM_001015876       | 6.75E-07    | 1.67245 | 1.67245 |
| Myo18a        | NM_011586          | 7.76E-05    | 1.67076 | 1.67076 |
| Eif2c4        | NM_153177          | 1.68E-05    | 1.66817 | 1.66817 |
| Aqp11         | NM_175105          | 5.34E-05    | 1.6658  | 1.6658  |
| Magel2        | NM_013779          | 8.46E-05    | 1.6649  | 1.6649  |
| Med12l        | NM_177855          | 6.24E-06    | 1.66418 | 1.66418 |
| Prickle3      | NM_175097          | 1.05E-05    | 1.66262 | 1.66262 |
| Nudt7         | NM_024437          | 0.000210283 | 1.66048 | 1.66048 |
| Abr           | NM_198895          | 1.17E-05    | 1.65994 | 1.65994 |
| Mmp25         | NM_001033339       | 1.79E-05    | 1.658   | 1.658   |
| Ethe1         | NM_023154          | 7.93E-06    | 1.65591 | 1.65591 |
| Hmgcl         | NM_008254          | 8.01E-06    | 1.65487 | 1.65487 |
| Atp6v1b2      | NM_007509          | 6.19E-06    | 1.65317 | 1.65317 |
| Lym5          | NM_001163628       | 7.59E-05    | 1.64782 | 1.64782 |
| Xylt2         | NM_145828          | 6.57E-06    | 1.64503 | 1.64503 |
| B4galt1       | NM_022305          | 1.02E-06    | 1.64424 | 1.64424 |
| Mapk1ip1      | NM_001045483       | 0.000391436 | 1.64276 | 1.64276 |
| Ehhadh        | NM_023737          | 0.000164474 | 1.64227 | 1.64227 |
| Ang           | NM_001161731       | 3.14E-05    | 1.64211 | 1.64211 |
| Gse1          | NM_198671          | 9.48E-06    | 1.63938 | 1.63938 |
| 0610031J06Rik | NM_020003          | 5.90E-05    | 1.63903 | 1.63903 |

|               |              |             |         |         |
|---------------|--------------|-------------|---------|---------|
| Icmt          | NM_133788    | 0.000103828 | 1.63642 | 1.63642 |
| Gm216         | BC150857     | 0.000361986 | 1.63567 | 1.63567 |
| Ifitm2        | NM_030694    | 1.85E-06    | 1.63125 | 1.63125 |
| G930009F23Rik | AK145170     | 6.32E-05    | 1.6287  | 1.6287  |
| Mrpl39        | NM_017404    | 1.05E-06    | 1.62791 | 1.62791 |
| Inpp1         | NM_008384    | 0.000562843 | 1.62763 | 1.62763 |
| C85492        | NM_153540    | 0.000696129 | 1.62637 | 1.62637 |
| Serpinb10     | NM_198028    | 0.000529409 | 1.62207 | 1.62207 |
| Rc3h1         | NM_001024952 | 5.91E-05    | 1.61556 | 1.61556 |
| Pgm1          | NM_025700    | 2.50E-07    | 1.61293 | 1.61293 |
| Vps36         | NM_027338    | 0.000469786 | 1.61197 | 1.61197 |
| Fam54b        | BC026808     | 2.18E-06    | 1.61105 | 1.61105 |
| Dsel          | NM_001081316 | 8.93E-06    | 1.60729 | 1.60729 |
| Rnf2          | NM_011277    | 6.52E-07    | 1.60702 | 1.60702 |
| Esrra         | NM_007953    | 4.97E-05    | 1.60552 | 1.60552 |
| Llg12         | NM_145438    | 7.68E-05    | 1.60517 | 1.60517 |
| Hprt          | NM_013556    | 7.06E-05    | 1.60065 | 1.60065 |
| Ccnc          | NM_016746    | 0.000232878 | 1.59174 | 1.59174 |
| Dirc2         | NM_153550    | 3.65E-05    | 1.59102 | 1.59102 |
| Tmem192       | NM_028427    | 8.80E-07    | 1.58875 | 1.58875 |
| Klhl21        | NM_001033352 | 0.000116608 | 1.58858 | 1.58858 |
| Ndufc2        | NM_024220    | 0.000178357 | 1.58757 | 1.58757 |
| Ino80b        | NM_023547    | 9.60E-07    | 1.58345 | 1.58345 |
| Lrp5          | NM_008513    | 4.83E-05    | 1.58148 | 1.58148 |
| Smpd2         | NM_009213    | 1.99E-05    | 1.58088 | 1.58088 |
| Dnajc18       | NM_029669    | 0.00080912  | 1.57864 | 1.57864 |
| Srl           | NM_175347    | 9.18E-05    | 1.5784  | 1.5784  |
| Strbp         | NM_009261    | 0.00019091  | 1.57744 | 1.57744 |
| Met           | NM_008591    | 0.000363676 | 1.57688 | 1.57688 |
| Slc22a23      | NM_001033167 | 5.80E-05    | 1.57417 | 1.57417 |
| Tmx4          | NM_029148    | 0.000309344 | 1.57381 | 1.57381 |
| Glis2         | NM_031184    | 0.000146875 | 1.57243 | 1.57243 |
| Synpo2        | NM_080451    | 0.000303695 | 1.57155 | 1.57155 |
| Tor2a         | NM_152800    | 4.32E-06    | 1.57126 | 1.57126 |
| Prr16         | NM_001081224 | 1.86E-07    | 1.56986 | 1.56986 |
| Fam32a        | NM_026455    | 9.63E-06    | 1.56547 | 1.56547 |
| Vps41         | NM_172120    | 0.000292045 | 1.56126 | 1.56126 |
| Vamp5         | NM_016872    | 4.17E-05    | 1.56124 | 1.56124 |
| Mfap3l        | NM_027756    | 0.000474517 | 1.56017 | 1.56017 |
| Cox8a         | NM_007750    | 4.65E-05    | 1.55979 | 1.55979 |
| Pla2g12a      | NM_183423    | 5.26E-06    | 1.55891 | 1.55891 |
| Tor1b         | NM_133673    | 8.58E-05    | 1.55771 | 1.55771 |
| Zfp777        | NM_001081382 | 0.000286591 | 1.55759 | 1.55759 |

|          |              |             |         |         |
|----------|--------------|-------------|---------|---------|
| Gigyf2   | NM_146112    | 1.28E-05    | 1.55735 | 1.55735 |
| Pex13    | NM_023651    | 9.05E-05    | 1.55735 | 1.55735 |
| Zbtb8a   | NM_028603    | 3.83E-07    | 1.55701 | 1.55701 |
| Slc39a7  | NM_008202    | 2.41E-05    | 1.55649 | 1.55649 |
| Shisa2   | NM_145463    | 5.36E-05    | 1.55479 | 1.55479 |
| Hspb8    | NM_030704    | 2.08E-05    | 1.55275 | 1.55275 |
| Fam186b  | NM_001081254 | 0.000340462 | 1.54967 | 1.54967 |
| Tmem5    | NM_153059    | 9.25E-06    | 1.5492  | 1.5492  |
| Pip4k2b  | NM_054051    | 0.00032142  | 1.5489  | 1.5489  |
| Sag      | NM_009118    | 0.000168537 | 1.5484  | 1.5484  |
| Atg3     | NM_026402    | 0.000209953 | 1.54794 | 1.54794 |
| Abcb10   | NM_019552    | 4.52E-05    | 1.5475  | 1.5475  |
| Rab21    | NM_024454    | 7.67E-05    | 1.54618 | 1.54618 |
| Cox4i1   | NM_009941    | 1.31E-05    | 1.54391 | 1.54391 |
| Rhbdd3   | NM_177370    | 1.10E-06    | 1.54165 | 1.54165 |
| Hsbp1    | NM_024219    | 0.000305514 | 1.54146 | 1.54146 |
| Prdm11   | NM_001177536 | 0.000165016 | 1.53876 | 1.53876 |
| Ergic3   | NM_025516    | 0.000100354 | 1.53677 | 1.53677 |
| Mon2     | NM_001163024 | 0.000217769 | 1.53595 | 1.53595 |
| Tdrd7    | NM_146142    | 0.00043113  | 1.53589 | 1.53589 |
| BC017643 | BC017643     | 3.46E-05    | 1.53186 | 1.53186 |
| Icam5    | NM_008319    | 1.77E-05    | 1.531   | 1.531   |
| Nudcd2   | NM_026023    | 9.18E-06    | 1.52785 | 1.52785 |
| Lypla1   | NM_008866    | 8.80E-06    | 1.52734 | 1.52734 |
| Gas2l1   | NM_030228    | 0.000698557 | 1.52704 | 1.52704 |
| Ifngr1   | NM_010511    | 2.07E-05    | 1.52584 | 1.52584 |
| Gm13033  | AK142202     | 6.61E-05    | 1.52567 | 1.52567 |
| Atp6v0d1 | NM_013477    | 0.000184511 | 1.52415 | 1.52415 |
| Etl4     | NM_001177631 | 9.97E-05    | 1.52388 | 1.52388 |
| Slc25a20 | NM_020520    | 0.000121177 | 1.52056 | 1.52056 |
| Sec14l2  | NM_144520    | 1.15E-05    | 1.51987 | 1.51987 |
| Sdcbp    | NM_001098227 | 7.17E-08    | 1.51898 | 1.51898 |
| BC003267 | NM_145591    | 2.78E-05    | 1.518   | 1.518   |
| Tmem53   | NM_026837    | 0.000114453 | 1.51737 | 1.51737 |
| Crtc3    | NM_173863    | 0.000725612 | 1.51699 | 1.51699 |
| Vps28    | NM_025842    | 2.60E-05    | 1.51649 | 1.51649 |
| Nlrc3    | NM_001081280 | 0.000584558 | 1.51639 | 1.51639 |
| Jkamp    | NM_024205    | 3.23E-05    | 1.51613 | 1.51613 |
| Mpg      | NM_010822    | 6.71E-05    | 1.51568 | 1.51568 |
| Tmem20   | NM_175507    | 3.83E-06    | 1.51507 | 1.51507 |
| Polrmt   | NM_172551    | 8.24E-06    | 1.51236 | 1.51236 |
| Nradd    | NM_026012    | 0.000468052 | 1.51051 | 1.51051 |
| Atrn     | NM_009730    | 0.000307157 | 1.50878 | 1.50878 |

|               |                    |             |         |         |
|---------------|--------------------|-------------|---------|---------|
| Ptger2        | NM_008964          | 0.000218141 | 1.50873 | 1.50873 |
| D030074E01Rik | NM_177038          | 7.82E-06    | 1.50854 | 1.50854 |
| Vps53         | NM_026664          | 4.28E-06    | 1.50786 | 1.50786 |
| Gde1          | NM_019580          | 0.000116929 | 1.50757 | 1.50757 |
| Adam23        | NM_011780          | 0.000467552 | 1.50685 | 1.50685 |
| Nudt3         | NM_019837          | 6.04E-06    | 1.50368 | 1.50368 |
| Chuk          | NM_007700          | 0.000220103 | 1.50175 | 1.50175 |
| Tbx2          | NM_009324          | 0.000937302 | 1.49891 | 1.49891 |
| Tjp1          | NM_009386          | 0.000301954 | 1.4984  | 1.4984  |
| 2010007H12Rik | BC052497           | 2.04E-05    | 1.49767 | 1.49767 |
| Hip1r         | NM_145070          | 1.00E-05    | 1.49319 | 1.49319 |
| Acads         | NM_007383          | 0.000964218 | 1.49144 | 1.49144 |
| Pon2          | NM_183308          | 0.000310144 | 1.49083 | 1.49083 |
| Phtf1         | NM_013629          | 0.000136517 | 1.48847 | 1.48847 |
| Rgs10         | NM_026418          | 0.000345894 | 1.4884  | 1.4884  |
| Disc1         | NM_174854          | 7.07E-05    | 1.4878  | 1.4878  |
| Bax           | NM_007527          | 6.06E-05    | 1.48663 | 1.48663 |
| 2900052L18Rik | ENSMUST00000062283 | 5.00E-06    | 1.48472 | 1.48472 |
| Lipa          | NM_021460          | 0.000113354 | 1.48293 | 1.48293 |
| Abl2          | NM_001136104       | 1.43E-07    | 1.48083 | 1.48083 |
| Anapc2        | NM_175300          | 1.67E-05    | 1.48005 | 1.48005 |
| A2ld1         | NM_145466          | 0.000179255 | 1.47993 | 1.47993 |
| Hadhb         | NM_145558          | 4.18E-05    | 1.47986 | 1.47986 |
| Ogfod2        | NM_025671          | 3.39E-05    | 1.4781  | 1.4781  |
| Itpkc         | NM_181593          | 0.000143401 | 1.47732 | 1.47732 |
| Ppapdc2       | NM_028922          | 0.000184836 | 1.47277 | 1.47277 |
| AA415398      | BC076608           | 4.19E-05    | 1.4724  | 1.4724  |
| Rhbdl3        | NM_139228          | 4.98E-05    | 1.47205 | 1.47205 |
| Mpzl1         | NM_001083897       | 2.79E-07    | 1.47135 | 1.47135 |
| Ccpg1         | NM_001114328       | 0.000382636 | 1.47111 | 1.47111 |
| Dok4          | NM_053246          | 0.000343288 | 1.47032 | 1.47032 |
| Rrn3          | NM_001039521       | 8.53E-08    | 1.46882 | 1.46882 |
| BC018507      | NM_144837          | 0.000242783 | 1.46449 | 1.46449 |
| Arsk          | NM_029847          | 0.000146077 | 1.46235 | 1.46235 |
| Tspan9        | NM_175414          | 0.000410361 | 1.46065 | 1.46065 |
| Glo1          | NM_025374          | 6.13E-05    | 1.46045 | 1.46045 |
| Ptpn1         | NM_011201          | 0.000227532 | 1.45984 | 1.45984 |
| Tmem25        | NM_027865          | 9.04E-05    | 1.45909 | 1.45909 |
| Slc25a36      | NM_138756          | 0.000840688 | 1.45796 | 1.45796 |
| Preb          | NM_016703          | 9.46E-05    | 1.45491 | 1.45491 |
| Zc3h12c       | NM_001162921       | 0.000109016 | 1.44781 | 1.44781 |
| Gm5785        | ENSMUST00000077293 | 0.000481999 | 1.44186 | 1.44186 |
| Zfp64         | NM_009564          | 2.91E-06    | 1.43686 | 1.43686 |

|               |              |             |         |         |
|---------------|--------------|-------------|---------|---------|
| Cobra1        | NM_021393    | 3.14E-06    | 1.43621 | 1.43621 |
| Tekt2         | NM_011902    | 0.000767321 | 1.43514 | 1.43514 |
| Hsf4          | NM_011939    | 0.000424705 | 1.43418 | 1.43418 |
| Tmem181a      | NM_001033178 | 4.71E-05    | 1.42817 | 1.42817 |
| Tysnd1        | NM_027912    | 0.000301266 | 1.4266  | 1.4266  |
| Cdc34         | NM_177613    | 0.000234637 | 1.42319 | 1.42319 |
| Unc119b       | NM_175352    | 2.98E-05    | 1.42118 | 1.42118 |
| Atp6v1h       | NM_133826    | 0.000346545 | 1.41855 | 1.41855 |
| Slc48a1       | NM_026353    | 0.000488201 | 1.41714 | 1.41714 |
| Prdxdd1       | NM_001163454 | 0.000164776 | 1.4145  | 1.4145  |
| 2510009E07Rik | NM_001001881 | 0.000525003 | 1.41302 | 1.41302 |
| Tmem18        | NM_172049    | 4.21E-05    | 1.41117 | 1.41117 |
| Rps27l        | NM_026467    | 0.000149914 | 1.40938 | 1.40938 |
| Bcl2l1        | NM_009743    | 0.000234472 | 1.40695 | 1.40695 |
| Pgm2          | NM_028132    | 0.000281728 | 1.40653 | 1.40653 |
| 2310028O11Rik | NM_001163006 | 6.99E-05    | 1.40411 | 1.40411 |
| Ero1lb        | NM_026184    | 0.000848197 | 1.40068 | 1.40068 |
| Kctd11        | NM_153143    | 0.000457564 | 1.39907 | 1.39907 |
| Hbp1          | NM_153198    | 0.000862962 | 1.39865 | 1.39865 |
| Mpv17l2       | NM_183170    | 0.000621049 | 1.39694 | 1.39694 |
| Pmpca         | NM_173180    | 2.92E-06    | 1.39505 | 1.39505 |
| Gna13         | NM_010303    | 1.41E-05    | 1.39276 | 1.39276 |
| Stxbp3a       | NM_011504    | 0.000430396 | 1.39149 | 1.39149 |
| Reep5         | NM_007874    | 0.000126691 | 1.38899 | 1.38899 |
| Llph          | NM_025431    | 0.00012544  | 1.38867 | 1.38867 |
| Drap1         | NM_024176    | 0.000128966 | 1.38766 | 1.38766 |
| Cdyl          | NM_009881    | 5.61E-05    | 1.38686 | 1.38686 |
| Rnaset2a      | NM_001083938 | 5.84E-05    | 1.38575 | 1.38575 |
| Tgfa          | NM_031199    | 0.000806127 | 1.38299 | 1.38299 |
| Baiap2l1      | NM_025833    | 0.000622864 | 1.37933 | 1.37933 |
| Cerk          | NM_145475    | 8.93E-05    | 1.37932 | 1.37932 |
| Htr2a         | NM_172812    | 0.000642306 | 1.37591 | 1.37591 |
| Pitpna        | NM_008850    | 2.25E-05    | 1.36982 | 1.36982 |
| Ndufa11       | NM_027244    | 1.17E-05    | 1.36939 | 1.36939 |
| Bcap31        | NM_012060    | 0.000149469 | 1.36918 | 1.36918 |
| Appl1         | NM_145221    | 5.10E-05    | 1.36841 | 1.36841 |
| Dynlrb1       | NM_025947    | 6.41E-07    | 1.36563 | 1.36563 |
| Abhd13        | NM_001081119 | 0.000527761 | 1.36428 | 1.36428 |
| Mapre1        | NM_007896    | 7.83E-06    | 1.36236 | 1.36236 |
| Rnf103        | NM_009543    | 2.79E-05    | 1.35706 | 1.35706 |
| Cd151         | NM_009842    | 0.000808972 | 1.35357 | 1.35357 |
| Grhpr         | NM_080289    | 0.000360126 | 1.35185 | 1.35185 |
| Bend7         | NM_178663    | 0.00012581  | 1.35146 | 1.35146 |



|               |                    |             |         |         |
|---------------|--------------------|-------------|---------|---------|
| 9130401M01Rik | BC050895           | 0.000130012 | 1.34894 | 1.34894 |
| Atp1b3        | NM_007502          | 1.40E-05    | 1.34815 | 1.34815 |
| Hebp1         | NM_013546          | 1.79E-05    | 1.34738 | 1.34738 |
| Atp6ap1       | NM_018794          | 1.85E-05    | 1.34658 | 1.34658 |
| Nog           | NM_008711          | 0.00055909  | 1.34539 | 1.34539 |
| Lrch1         | NM_001033439       | 0.000954426 | 1.34503 | 1.34503 |
| Yif1a         | NM_026553          | 0.000263974 | 1.34412 | 1.34412 |
| Sema4g        | NM_011976          | 0.000805506 | 1.34353 | 1.34353 |
| Wbp1          | NM_016757          | 6.35E-07    | 1.34309 | 1.34309 |
| Tpst2         | NM_009419          | 0.000797291 | 1.3428  | 1.3428  |
| Hk1           | NM_010438          | 0.000174186 | 1.34232 | 1.34232 |
| Lrrc10        | AF527781           | 0.000621876 | 1.34069 | 1.34069 |
| Ctsb          | NM_007798          | 8.08E-05    | 1.33874 | 1.33874 |
| Chmp1b        | NM_024190          | 0.000826665 | 1.33765 | 1.33765 |
| 2210404J11Rik | NM_001039552       | 0.000258456 | 1.33694 | 1.33694 |
| Gnai2         | NM_008138          | 0.00076633  | 1.33584 | 1.33584 |
| Prkar1a       | NM_021880          | 3.48E-05    | 1.33073 | 1.33073 |
| Mir34a        | NR_029751          | 0.000553429 | 1.32951 | 1.32951 |
| Mir687        | NR_030459          | 3.30E-07    | 1.32699 | 1.32699 |
| Ly6e          | NM_001164036       | 0.00021182  | 1.32695 | 1.32695 |
| Osbpl10       | NM_148958          | 0.000478118 | 1.32492 | 1.32492 |
| Tmc6          | NM_145439          | 9.08E-07    | 1.31941 | 1.31941 |
| Rbm45         | NM_153405          | 0.000622578 | 1.31761 | 1.31761 |
| D17Wsu92e     | NM_001033279       | 5.21E-06    | 1.3171  | 1.3171  |
| Fh1           | NM_010209          | 0.000179484 | 1.31444 | 1.31444 |
| Zfp3          | NM_177565          | 0.000472663 | 1.31227 | 1.31227 |
| Peli3         | NM_172835          | 0.000484043 | 1.31181 | 1.31181 |
| Ncbp2         | NM_026554          | 0.000550334 | 1.30996 | 1.30996 |
| Rasl12        | NM_001033158       | 0.000598851 | 1.30882 | 1.30882 |
| Ccdc109b      | NM_025779          | 0.000307364 | 1.30879 | 1.30879 |
| Dbi           | NM_001037999       | 4.48E-05    | 1.30754 | 1.30754 |
| Rnh1          | NM_001172101       | 7.32E-05    | 1.30238 | 1.30238 |
| Slc17a5       | NM_172773          | 3.58E-05    | 1.302   | 1.302   |
| Eif4ebp1      | NM_007918          | 0.000784587 | 1.29804 | 1.29804 |
| Ptk2          | NM_007982          | 0.000330821 | 1.28995 | 1.28995 |
| Slc10a4       | NM_173403          | 0.000922312 | 1.28856 | 1.28856 |
| 1700055D18Rik | ENSMUST00000095105 | 0.000920133 | 1.28855 | 1.28855 |
| Gna11         | NM_010301          | 0.000775388 | 1.28676 | 1.28676 |
| Galnt1        | NM_013814          | 0.000208706 | 1.28268 | 1.28268 |
| Necap2        | NM_025383          | 4.96E-06    | 1.27812 | 1.27812 |
| Atg16l2       | NM_001111111       | 9.10E-05    | 1.27475 | 1.27475 |
| AI597479      | NM_133818          | 0.000133571 | 1.27467 | 1.27467 |
| Fam3a         | NM_025473          | 0.000843483 | 1.27425 | 1.27425 |

|               |                    |             |          |          |
|---------------|--------------------|-------------|----------|----------|
| Nppc          | NM_010933          | 0.000160546 | 1.27185  | 1.27185  |
| E330017A01Rik | BC099383           | 0.000321575 | 1.27123  | 1.27123  |
| Ptges2        | NM_133783          | 0.000366663 | 1.26359  | 1.26359  |
| Dhrs1         | NM_026819          | 0.00059197  | 1.26328  | 1.26328  |
| 2310033P09Rik | NM_024210          | 0.000511076 | 1.26067  | 1.26067  |
| Dhx32         | NM_133941          | 0.000251901 | 1.25741  | 1.25741  |
| Rbm33         | NM_028234          | 0.000450597 | 1.25443  | 1.25443  |
| Cpeb3         | NM_198300          | 0.000839846 | 1.24964  | 1.24964  |
| Sdccag8       | NM_029756          | 0.000888948 | 1.24767  | 1.24767  |
| Itpa          | NM_025922          | 0.000447848 | 1.24412  | 1.24412  |
| Trpc4ap       | NM_001163452       | 0.000900075 | 1.24013  | 1.24013  |
| Ghitm         | NM_078478          | 0.000430178 | 1.23782  | 1.23782  |
| Brd7          | NM_012047          | 2.14E-05    | 1.23193  | 1.23193  |
| St8sia2       | NM_009181          | 0.000148657 | 1.22375  | 1.22375  |
| Ath1          | NM_145387          | 0.000987649 | 1.21872  | 1.21872  |
| Olfr616       | NM_147099          | 0.000277586 | 1.21831  | 1.21831  |
| Nadk          | NM_138671          | 9.25E-05    | 1.21086  | 1.21086  |
| Mrm1          | NM_145433          | 1.86E-06    | 1.20967  | 1.20967  |
| Mfn1          | NM_024200          | 0.000584141 | 1.20566  | 1.20566  |
| Hiatl1        | NM_133680          | 0.000835738 | 1.20523  | 1.20523  |
| Mafg          | NM_010756          | 0.000769079 | 1.20327  | 1.20327  |
| Ccdc79        | NM_180958          | 0.000293305 | 1.19429  | 1.19429  |
| Irx5          | NM_018826          | 0.000654348 | 1.19111  | 1.19111  |
| Smek2         | NM_134034          | 0.000335619 | 1.17275  | 1.17275  |
| Fam161b       | BC062132           | 0.000592265 | 1.16302  | 1.16302  |
| Tpt1          | NM_009429          | 0.000324044 | 1.15555  | 1.15555  |
| Gm12472       | ENSMUST00000105153 | 0.000181547 | 1.13832  | 1.13832  |
| Sec61a2       | NM_021305          | 0.000275217 | 1.12889  | 1.12889  |
| Serpinb11     | NM_025867          | 0.000976275 | 1.10863  | 1.10863  |
| Rnf4          | NM_011278          | 0.000295401 | 1.08115  | 1.08115  |
| Vmn2r-ps14    | NR_002888          | 0.000764069 | 0.900466 | -1.11054 |
| Adamts3       | NM_177872          | 0.000355277 | 0.894338 | -1.11815 |
| LOC100044416  | XR_030619          | 0.000761154 | 0.873739 | -1.14451 |
| Vmn1r170      | NM_001166722       | 0.000471114 | 0.872475 | -1.14617 |
| U2af2         | NM_133671          | 0.000139728 | 0.865352 | -1.1556  |
| Phex          | NM_011077          | 0.0002862   | 0.864914 | -1.15618 |
| Rrp1          | NM_010925          | 0.000212256 | 0.864103 | -1.15727 |
| Ccdc59        | NM_025602          | 0.000742096 | 0.857179 | -1.16662 |
| Pdap1         | NM_001033313       | 9.74E-06    | 0.849053 | -1.17778 |
| Snrnp70       | NM_009224          | 0.000465628 | 0.846883 | -1.1808  |
| Tmem208       | NM_025486          | 6.10E-05    | 0.844078 | -1.18472 |
| Sec23b        | NM_019787          | 8.08E-05    | 0.843583 | -1.18542 |
| Zc3h15        | NM_026934          | 0.000489903 | 0.842929 | -1.18634 |

|               |              |             |          |          |
|---------------|--------------|-------------|----------|----------|
| Atp5c1        | NM_020615    | 6.64E-05    | 0.842573 | -1.18684 |
| Prr3          | NR_028516    | 0.00018065  | 0.84212  | -1.18748 |
| Zcrb1         | NM_026025    | 0.000162501 | 0.840015 | -1.19045 |
| Klhdc3        | NM_027910    | 0.000722449 | 0.838344 | -1.19283 |
| Srpk1         | NM_016795    | 7.41E-05    | 0.838057 | -1.19324 |
| Samhd1        | NM_018851    | 0.000464767 | 0.833913 | -1.19917 |
| Gcsh          | NM_026572    | 0.000911481 | 0.8325   | -1.2012  |
| Sfrs9         | NM_025573    | 0.000107853 | 0.831129 | -1.20318 |
| Xpo5          | NM_028198    | 1.18E-05    | 0.829235 | -1.20593 |
| Ndnl2         | NM_023239    | 0.000796886 | 0.827819 | -1.20799 |
| Pisd          | NM_177298    | 5.42E-05    | 0.827605 | -1.20831 |
| Rbm3          | NM_001166409 | 0.000407643 | 0.827367 | -1.20865 |
| Sec23ip       | NM_001029982 | 0.00015089  | 0.821009 | -1.21801 |
| Trmt2a        | NM_008307    | 0.000257626 | 0.818556 | -1.22166 |
| Tnpo1         | NM_178716    | 0.000294195 | 0.816296 | -1.22505 |
| Neu1          | NM_010893    | 0.000341111 | 0.815027 | -1.22695 |
| 6330416G13Rik | NM_144905    | 4.60E-05    | 0.814939 | -1.22709 |
| Ctbp1         | NM_013502    | 6.76E-05    | 0.813485 | -1.22928 |
| Zfp286        | NM_138949    | 0.00065187  | 0.809907 | -1.23471 |
| Gmps          | NM_001033300 | 0.000168406 | 0.808564 | -1.23676 |
| Sec63         | NM_153055    | 0.000477687 | 0.807997 | -1.23763 |
| Ythdf2        | NM_145393    | 0.00043505  | 0.807772 | -1.23797 |
| Cnot8         | NM_026949    | 0.000853289 | 0.803803 | -1.24409 |
| Nus1          | NM_030250    | 9.34E-05    | 0.802901 | -1.24548 |
| Rwdd4a        | NM_203507    | 1.42E-05    | 0.802633 | -1.2459  |
| Gspt1         | NM_146066    | 2.83E-05    | 0.800308 | -1.24952 |
| Ipo9          | NM_153774    | 6.87E-05    | 0.799653 | -1.25054 |
| Dgcr14        | NM_022408    | 0.000351962 | 0.799014 | -1.25154 |
| Vars2         | NM_175137    | 9.16E-05    | 0.797701 | -1.2536  |
| Zfp689        | NM_175163    | 3.40E-05    | 0.795682 | -1.25678 |
| Olf1000       | NM_001011695 | 6.63E-06    | 0.795462 | -1.25713 |
| Slc25a10      | NM_013770    | 0.0008278   | 0.794793 | -1.25819 |
| Med8          | NM_020000    | 0.000326679 | 0.793614 | -1.26006 |
| Bub3          | NM_009774    | 0.000522715 | 0.792742 | -1.26144 |
| Terf2         | NM_009353    | 2.45E-05    | 0.791479 | -1.26346 |
| Tbl3          | NM_145396    | 0.000532298 | 0.790968 | -1.26427 |
| Cxxc1         | NM_028868    | 0.000522344 | 0.789878 | -1.26602 |
| Cnot6         | NM_212484    | 0.000281893 | 0.788713 | -1.26789 |
| Hnrnpul1      | NM_144922    | 0.000250569 | 0.788623 | -1.26803 |
| Lsm12         | NM_172947    | 0.000403877 | 0.788379 | -1.26842 |
| 2410127L17Rik | NM_026120    | 0.000184556 | 0.78797  | -1.26908 |
| Rbbp7         | NM_009031    | 9.51E-05    | 0.785619 | -1.27288 |
| Znhit1        | NM_027318    | 0.000327242 | 0.784831 | -1.27416 |

|          |                    |             |          |          |
|----------|--------------------|-------------|----------|----------|
| Suv420h1 | NM_001167885       | 2.13E-05    | 0.784355 | -1.27493 |
| Zfp207   | ENSMUST00000017567 | 0.000885371 | 0.784036 | -1.27545 |
| Nicn1    | NM_025449          | 0.000359485 | 0.783827 | -1.27579 |
| Ercc2    | NM_007949          | 0.000808794 | 0.78265  | -1.27771 |
| Pias2    | NM_001164168       | 0.000226442 | 0.780739 | -1.28084 |
| Wac      | NM_153085          | 5.34E-06    | 0.780297 | -1.28156 |
| Cd2ap    | NM_009847          | 0.000438959 | 0.779434 | -1.28298 |
| Hddc2    | NM_027168          | 8.61E-05    | 0.779337 | -1.28314 |
| Nod1     | NM_172729          | 0.00016782  | 0.778167 | -1.28507 |
| Naca     | NM_001113199       | 0.000165274 | 0.776413 | -1.28797 |
| Ints12   | NM_027927          | 0.000183783 | 0.775461 | -1.28956 |
| Raver1   | NM_027911          | 0.000140198 | 0.773849 | -1.29224 |
| Dgcr2    | NM_010048          | 0.000648407 | 0.77257  | -1.29438 |
| Cct6a    | NM_009838          | 0.000206141 | 0.771501 | -1.29617 |
| Gm10396  | ENSMUST00000100814 | 0.000785912 | 0.770737 | -1.29746 |
| Zdhhc5   | NM_144887          | 2.25E-05    | 0.769942 | -1.2988  |
| Coq5     | NM_026504          | 0.000714485 | 0.769272 | -1.29993 |
| Alg11    | NM_183142          | 0.000188851 | 0.76859  | -1.30108 |
| Pus7     | NM_178403          | 9.02E-05    | 0.766646 | -1.30438 |
| Fbl      | NM_007991          | 9.55E-05    | 0.766394 | -1.30481 |
| Pphln1   | NM_146062          | 2.57E-05    | 0.766001 | -1.30548 |
| Tcp1     | NM_013686          | 0.000221295 | 0.765954 | -1.30556 |
| Kcnma1   | NM_010610          | 0.000174477 | 0.765941 | -1.30558 |
| Slc29a1  | NM_022880          | 0.000143762 | 0.765596 | -1.30617 |
| Setd8    | NM_030241          | 0.000222746 | 0.764625 | -1.30783 |
| Zfp157   | NM_028130          | 0.000698472 | 0.764013 | -1.30888 |
| Ppp2r1b  | NM_001034085       | 0.000132893 | 0.761497 | -1.3132  |
| Nudc     | NM_010948          | 0.00076625  | 0.761223 | -1.31368 |
| Wdr74    | NM_134139          | 0.000989088 | 0.76025  | -1.31536 |
| Morf4l1  | NM_001039147       | 0.000124064 | 0.759314 | -1.31698 |
| Selk     | NM_019979          | 1.04E-05    | 0.759036 | -1.31746 |
| Naa50    | NM_028108          | 0.000252245 | 0.757134 | -1.32077 |
| Zfp184   | NM_183014          | 9.29E-05    | 0.756304 | -1.32222 |
| Cdk8     | NM_153599          | 0.000950937 | 0.755783 | -1.32313 |
| Gm13238  | NR_033612          | 2.09E-05    | 0.755717 | -1.32325 |
| Mylk2    | NM_001081044       | 0.000191516 | 0.75565  | -1.32336 |
| Fam98b   | NM_026620          | 6.41E-05    | 0.754323 | -1.32569 |
| C87436   | NR_027370          | 0.000396442 | 0.753794 | -1.32662 |
| Sf3a1    | NM_026175          | 0.000327014 | 0.752922 | -1.32816 |
| Lrrc59   | NM_133807          | 7.29E-05    | 0.75285  | -1.32829 |
| Ptges3   | NM_019766          | 0.000178148 | 0.752816 | -1.32834 |
| Bap1     | NM_027088          | 0.000469895 | 0.75164  | -1.33042 |
| Tsen15   | NM_025677          | 0.00064334  | 0.751514 | -1.33065 |

|               |              |             |          |          |
|---------------|--------------|-------------|----------|----------|
| Sf1           | NM_001110791 | 0.000215849 | 0.7505   | -1.33244 |
| Mbtd1         | NM_134012    | 0.000400025 | 0.748241 | -1.33647 |
| Dullard       | NM_026017    | 0.000190118 | 0.747748 | -1.33735 |
| Telo2         | NM_001163661 | 0.000157072 | 0.74748  | -1.33783 |
| Ddx23         | NM_001080981 | 5.24E-05    | 0.745429 | -1.34151 |
| Ikzf5         | NM_175115    | 6.60E-05    | 0.744929 | -1.34241 |
| Appbp2        | NM_025825    | 2.15E-05    | 0.743947 | -1.34418 |
| Slc35a4       | NM_026404    | 9.41E-05    | 0.743618 | -1.34478 |
| Ruvbl2        | NM_011304    | 0.000825966 | 0.743491 | -1.34501 |
| Rnf168        | NM_027355    | 0.000631007 | 0.743303 | -1.34535 |
| Upf1          | NM_001122829 | 0.000388609 | 0.742476 | -1.34684 |
| Hnrnpab       | NM_001048061 | 1.64E-05    | 0.742296 | -1.34717 |
| Dlat          | NM_145614    | 0.000992291 | 0.741284 | -1.34901 |
| Lrch3         | NM_001081255 | 2.53E-06    | 0.74029  | -1.35082 |
| Abce1         | NM_015751    | 0.00081023  | 0.740099 | -1.35117 |
| Gm6554        | XR_031471    | 0.000417578 | 0.739941 | -1.35146 |
| Uba3          | NM_011666    | 2.27E-05    | 0.739417 | -1.35242 |
| Nek7          | NM_021605    | 0.000711073 | 0.738952 | -1.35327 |
| Farsa         | NM_025648    | 4.82E-06    | 0.738598 | -1.35392 |
| Mrps17        | NM_025450    | 0.000124831 | 0.735069 | -1.36042 |
| Ranbp1        | NM_011239    | 0.000133058 | 0.73395  | -1.36249 |
| Zfp746        | NM_001163475 | 0.000141547 | 0.733835 | -1.3627  |
| Prkacb        | NM_011100    | 0.000483033 | 0.7337   | -1.36296 |
| Hspa8         | NM_031165    | 2.83E-07    | 0.732362 | -1.36545 |
| Nars          | NM_001142950 | 1.30E-06    | 0.732017 | -1.36609 |
| 0610009O20Rik | NM_024179    | 5.03E-05    | 0.73154  | -1.36698 |
| Crebbp        | NM_001025432 | 0.000672156 | 0.731522 | -1.36701 |
| E2f3          | NM_010093    | 0.000172355 | 0.731417 | -1.36721 |
| Lonp1         | NM_028782    | 0.000457212 | 0.731174 | -1.36766 |
| Pabpn1        | NM_019402    | 1.95E-05    | 0.730287 | -1.36932 |
| Klhdc2        | NM_027117    | 0.000277006 | 0.729949 | -1.36996 |
| lpo8          | NM_001081113 | 0.000404875 | 0.729933 | -1.36999 |
| Sdad1         | NM_172713    | 0.000805043 | 0.72991  | -1.37003 |
| Ap2a2         | NM_007459    | 0.000309029 | 0.729427 | -1.37094 |
| Lyar          | NM_025281    | 0.000124608 | 0.729311 | -1.37116 |
| Josd1         | NM_028792    | 0.000205295 | 0.729235 | -1.3713  |
| Nhlrc2        | NM_025811    | 1.40E-06    | 0.72921  | -1.37135 |
| Prmt5         | NM_013768    | 8.45E-05    | 0.728783 | -1.37215 |
| Vkorc1l1      | NM_027121    | 2.96E-05    | 0.726363 | -1.37672 |
| Cnbp          | NM_013493    | 1.29E-05    | 0.725639 | -1.3781  |
| Mrps5         | NM_029963    | 0.00082834  | 0.725467 | -1.37842 |
| 2-九月          | NM_001159719 | 6.09E-08    | 0.725251 | -1.37883 |
| Topbp1        | NM_176979    | 1.24E-05    | 0.724588 | -1.38009 |

|               |              |             |          |          |
|---------------|--------------|-------------|----------|----------|
| McpH1         | NM_173189    | 5.93E-05    | 0.724437 | -1.38038 |
| Timm9         | NM_013896    | 0.000129134 | 0.723827 | -1.38155 |
| Sf3a2         | NM_013651    | 9.53E-06    | 0.72365  | -1.38188 |
| Mepce         | NM_144913    | 0.00018914  | 0.723255 | -1.38264 |
| Hdgf          | NM_008231    | 2.83E-05    | 0.723061 | -1.38301 |
| Ipo11         | NM_029665    | 0.000143271 | 0.722843 | -1.38343 |
| Timm10        | NM_013899    | 0.00064774  | 0.721904 | -1.38523 |
| 2610507B11Rik | NM_001002004 | 0.000764647 | 0.721863 | -1.3853  |
| Ncbp1         | NM_001033201 | 0.000425884 | 0.720773 | -1.3874  |
| Smek1         | NM_211355    | 3.50E-06    | 0.720054 | -1.38878 |
| E130303B06Rik | BC052498     | 0.000600294 | 0.719342 | -1.39016 |
| Fubp1         | NM_057172    | 0.000203861 | 0.718975 | -1.39087 |
| Chchd3        | NM_025336    | 0.000569776 | 0.717986 | -1.39279 |
| Zfp60         | NM_009560    | 0.000421178 | 0.717729 | -1.39328 |
| Ints2         | NM_027421    | 0.000267529 | 0.717463 | -1.3938  |
| Immt          | NM_029673    | 0.000381143 | 0.716378 | -1.39591 |
| Ikbkap        | NM_026079    | 1.89E-05    | 0.714669 | -1.39925 |
| Htra2         | NM_019752    | 0.000791665 | 0.713935 | -1.40069 |
| Bre           | NM_181279    | 1.31E-06    | 0.713791 | -1.40097 |
| Mrpl3         | NM_053159    | 0.000693946 | 0.713729 | -1.40109 |
| Mrpl35        | NM_025430    | 0.000162375 | 0.71278  | -1.40296 |
| Cbx5          | NM_007626    | 3.77E-05    | 0.712066 | -1.40437 |
| Riok2         | NM_025934    | 0.000884896 | 0.712039 | -1.40442 |
| Dennd4c       | NM_001081014 | 5.27E-05    | 0.71162  | -1.40524 |
| Nup155        | NM_133227    | 0.000332433 | 0.711588 | -1.40531 |
| Dnajc7        | NM_019795    | 0.000520527 | 0.710773 | -1.40692 |
| Ranbp3        | NM_027933    | 1.53E-06    | 0.710604 | -1.40725 |
| Socs6         | NM_018821    | 9.77E-05    | 0.709488 | -1.40947 |
| Alkbh5        | NM_172943    | 2.21E-05    | 0.709356 | -1.40973 |
| Il15ra        | NM_008358    | 0.00028788  | 0.708968 | -1.4105  |
| Ncor1         | NM_011308    | 0.000107533 | 0.708706 | -1.41102 |
| Pes1          | NM_022889    | 0.000414825 | 0.708189 | -1.41205 |
| Acpl2         | NM_153420    | 7.35E-05    | 0.707068 | -1.41429 |
| 9930104L06Rik | NM_177573    | 0.000117741 | 0.706498 | -1.41543 |
| Cpsf7         | NM_172302    | 0.000553722 | 0.706419 | -1.41559 |
| Cox10         | NM_178379    | 0.000653956 | 0.705876 | -1.41668 |
| Ap1g1         | NM_009677    | 0.00087096  | 0.704138 | -1.42018 |
| Surf6         | NM_009298    | 0.000945154 | 0.703458 | -1.42155 |
| Donson        | NM_021720    | 7.13E-05    | 0.702654 | -1.42317 |
| Aco1          | NM_007386    | 1.56E-05    | 0.702413 | -1.42366 |
| Dut           | NM_023595    | 0.000774537 | 0.701949 | -1.4246  |
| Polr2c        | NM_009090    | 1.64E-05    | 0.700569 | -1.42741 |
| Rnf121        | NM_029211    | 3.20E-05    | 0.700329 | -1.4279  |

|               |              |             |          |          |
|---------------|--------------|-------------|----------|----------|
| Yme1l1        | NM_013771    | 0.000246696 | 0.70011  | -1.42835 |
| Rbm22         | NM_025776    | 3.11E-05    | 0.69986  | -1.42886 |
| Yrdc          | NM_153566    | 0.000174409 | 0.699843 | -1.42889 |
| Ctcf          | NM_181322    | 0.000170215 | 0.699669 | -1.42925 |
| Nmd3          | NM_133787    | 0.000141635 | 0.698783 | -1.43106 |
| Med16         | NM_198107    | 7.55E-05    | 0.698346 | -1.43196 |
| Itfg2         | NM_133927    | 0.000714624 | 0.698175 | -1.43231 |
| Fancl         | NM_025923    | 2.77E-05    | 0.696319 | -1.43612 |
| 9430015G10Rik | NM_177205    | 0.000123166 | 0.695834 | -1.43712 |
| Gm447         | BC025881     | 2.31E-06    | 0.695609 | -1.43759 |
| Taf1a         | NM_021466    | 0.000971332 | 0.694901 | -1.43905 |
| Slc5a7        | NM_022025    | 0.000401339 | 0.69483  | -1.4392  |
| Ube2t         | NM_026024    | 0.000671163 | 0.694768 | -1.43933 |
| Lym4          | NM_201358    | 6.88E-05    | 0.693677 | -1.44159 |
| Casc3         | NM_138660    | 0.000147234 | 0.693579 | -1.4418  |
| 6330577E15Rik | NM_026377    | 2.52E-05    | 0.693574 | -1.44181 |
| Tmem188       | NM_029074    | 0.000132083 | 0.692674 | -1.44368 |
| Gjc1          | NM_001159382 | 5.62E-05    | 0.692189 | -1.44469 |
| Gart          | NM_010256    | 0.000420222 | 0.692128 | -1.44482 |
| Vars          | NM_011690    | 7.98E-05    | 0.691872 | -1.44535 |
| Mettl13       | NM_144877    | 0.000310099 | 0.691023 | -1.44713 |
| Paics         | NM_025939    | 0.000399429 | 0.690127 | -1.44901 |
| Ttf2          | NM_001013026 | 0.000484596 | 0.689837 | -1.44962 |
| AA408296      | NM_145415    | 4.02E-06    | 0.689369 | -1.4506  |
| Cdc25a        | NM_007658    | 0.000750513 | 0.689336 | -1.45067 |
| Fyttd1        | NM_027226    | 0.000120163 | 0.689059 | -1.45125 |
| E2f6          | NM_033270    | 8.61E-06    | 0.68886  | -1.45167 |
| Ranbp2        | NM_011240    | 0.000398387 | 0.688811 | -1.45178 |
| Mis12         | NM_025993    | 0.000301143 | 0.687774 | -1.45397 |
| Bckdk         | NM_009739    | 4.76E-06    | 0.687035 | -1.45553 |
| Tor1aip1      | NM_001160018 | 0.000989594 | 0.686525 | -1.45661 |
| 1700030K09Rik | NM_028170    | 0.000617641 | 0.686315 | -1.45706 |
| Pex14         | NM_019781    | 6.66E-05    | 0.686242 | -1.45721 |
| Hnrnpa3       | NM_053263    | 5.84E-06    | 0.685906 | -1.45792 |
| Lnp           | NM_001110209 | 0.000291645 | 0.68459  | -1.46073 |
| Luc7l2        | NM_138680    | 7.21E-07    | 0.684487 | -1.46095 |
| Gm71          | NM_001033236 | 0.000145817 | 0.684143 | -1.46168 |
| Irak2         | NM_172161    | 1.29E-05    | 0.683898 | -1.46221 |
| Zfp647        | NM_001168276 | 0.000983213 | 0.683604 | -1.46284 |
| Zfp26         | NM_011753    | 0.000365129 | 0.683029 | -1.46407 |
| Get4          | NM_026269    | 1.13E-05    | 0.682988 | -1.46416 |
| Pthr2         | NM_175004    | 0.000537516 | 0.682286 | -1.46566 |
| Smc6          | NM_025695    | 3.39E-06    | 0.680245 | -1.47006 |

|               |              |             |          |          |
|---------------|--------------|-------------|----------|----------|
| Actr3         | NM_023735    | 1.17E-06    | 0.680068 | -1.47044 |
| Cd3eap        | NM_145822    | 3.63E-06    | 0.679926 | -1.47075 |
| Eif4a3        | NM_138669    | 4.09E-05    | 0.679785 | -1.47105 |
| Ccdc6         | NM_001111121 | 0.000677348 | 0.678741 | -1.47332 |
| Ruvbl1        | NM_019685    | 0.00026478  | 0.67857  | -1.47369 |
| Cks1b         | NM_016904    | 5.01E-06    | 0.678433 | -1.47398 |
| Dhx29         | NM_172594    | 1.26E-05    | 0.678314 | -1.47424 |
| Aldh9a1       | NM_019993    | 0.000101981 | 0.678081 | -1.47475 |
| Ckap5         | NM_001165989 | 8.12E-05    | 0.677888 | -1.47517 |
| Prpf31        | NM_027328    | 0.000684411 | 0.677544 | -1.47592 |
| Lsm6          | NM_030145    | 0.000706444 | 0.676709 | -1.47774 |
| 2810004N23Rik | NM_025615    | 2.53E-05    | 0.676303 | -1.47863 |
| Gin1          | NM_026250    | 0.000464158 | 0.67613  | -1.47901 |
| Aifm1         | NM_012019    | 0.000617145 | 0.676125 | -1.47902 |
| Atm           | NM_007499    | 0.000317035 | 0.67585  | -1.47962 |
| Nt5dc1        | NM_176968    | 6.48E-06    | 0.675437 | -1.48052 |
| Zfp503        | NM_145459    | 1.18E-05    | 0.675384 | -1.48064 |
| Dlg3          | NM_016747    | 0.000249828 | 0.675083 | -1.4813  |
| Hspa9         | NM_010481    | 4.16E-05    | 0.674533 | -1.48251 |
| Mrpl19        | NM_026490    | 0.000887231 | 0.671178 | -1.48992 |
| Glcci1        | NM_133236    | 4.86E-05    | 0.670992 | -1.49033 |
| Camkk2        | NM_145358    | 7.97E-05    | 0.67076  | -1.49085 |
| Tab2          | NM_138667    | 2.09E-06    | 0.670756 | -1.49086 |
| Pcnt          | NM_008787    | 0.000931639 | 0.669448 | -1.49377 |
| Snora7a       | NR_028546    | 0.000215848 | 0.669309 | -1.49408 |
| Ormdl1        | NM_145517    | 0.000259891 | 0.669228 | -1.49426 |
| Dclre1a       | NM_018831    | 0.00020957  | 0.668876 | -1.49504 |
| Rps6kb1       | NM_001114334 | 0.000222355 | 0.668417 | -1.49607 |
| Nudcd1        | NM_026149    | 3.48E-05    | 0.666969 | -1.49932 |
| 1110007A13Rik | BC038342     | 8.13E-05    | 0.666753 | -1.49981 |
| Wdyhv1        | NM_029734    | 0.000428782 | 0.666751 | -1.49981 |
| Guk1          | NM_008193    | 5.27E-05    | 0.666305 | -1.50081 |
| Spin4         | NM_178753    | 1.04E-06    | 0.66513  | -1.50346 |
| Fbxo21        | NM_145564    | 0.000196758 | 0.664988 | -1.50379 |
| Kif24         | NM_024241    | 0.000312382 | 0.664734 | -1.50436 |
| Foxk2         | NM_001080932 | 1.44E-07    | 0.664034 | -1.50595 |
| Xrcc5         | NM_009533    | 0.000262602 | 0.663652 | -1.50681 |
| Timm44        | NM_011592    | 7.90E-05    | 0.663344 | -1.50751 |
| 2700094K13Rik | NM_001033166 | 0.000407258 | 0.662276 | -1.50995 |
| Krr1          | NM_178610    | 8.64E-05    | 0.659875 | -1.51544 |
| Zmym4         | NM_001114399 | 0.000793981 | 0.659173 | -1.51705 |
| Zfp39         | NM_011758    | 1.40E-05    | 0.658693 | -1.51816 |
| Npat          | NM_001081152 | 0.00042162  | 0.657101 | -1.52184 |



|               |              |             |          |          |
|---------------|--------------|-------------|----------|----------|
| Smndc1        | NM_172429    | 1.60E-05    | 0.655171 | -1.52632 |
| Smyd4         | NM_001102611 | 0.000336802 | 0.654982 | -1.52676 |
| Rsrc1         | NM_025822    | 6.47E-05    | 0.654501 | -1.52788 |
| Baz1b         | NM_011714    | 0.000129292 | 0.654423 | -1.52806 |
| Hlx           | NM_008250    | 4.12E-05    | 0.65416  | -1.52868 |
| Ogg1          | NM_010957    | 1.85E-05    | 0.652849 | -1.53175 |
| Sfrs12        | NM_172592    | 5.16E-07    | 0.652745 | -1.53199 |
| Rnf219        | NM_026047    | 0.000127783 | 0.652519 | -1.53252 |
| Dph1          | NM_144491    | 0.000156813 | 0.651559 | -1.53478 |
| Uqcc          | NM_018888    | 2.56E-05    | 0.650976 | -1.53615 |
| Brd9          | NM_001024508 | 0.000142201 | 0.649476 | -1.5397  |
| Dvl2          | NM_007888    | 5.51E-06    | 0.648059 | -1.54307 |
| 2810453106Rik | NM_026050    | 1.76E-05    | 0.64753  | -1.54433 |
| Aste1         | NM_025651    | 3.38E-05    | 0.647448 | -1.54453 |
| Brp16         | NM_021555    | 0.000100543 | 0.646971 | -1.54566 |
| Med1          | NM_013634    | 0.000804908 | 0.64677  | -1.54615 |
| Azin1         | NM_001102458 | 0.000173379 | 0.646422 | -1.54698 |
| Ssrp1         | NM_182990    | 8.92E-05    | 0.646232 | -1.54743 |
| Ssbp1         | NM_212468    | 1.03E-05    | 0.645746 | -1.5486  |
| Tsr2          | NM_001164578 | 2.55E-06    | 0.645472 | -1.54925 |
| Ctdp1         | NM_026295    | 1.87E-05    | 0.645453 | -1.5493  |
| Tubg1         | NM_134024    | 3.59E-06    | 0.645363 | -1.54951 |
| Rnps1         | NM_009070    | 5.21E-06    | 0.645266 | -1.54975 |
| Dph2          | NM_026344    | 0.000221249 | 0.645241 | -1.54981 |
| Gatc          | NM_029645    | 0.000348593 | 0.64407  | -1.55263 |
| Dhcr24        | NM_053272    | 0.000279489 | 0.643182 | -1.55477 |
| Rcl1          | NM_021525    | 0.0003095   | 0.643105 | -1.55496 |
| Gemin6        | NM_026053    | 0.000107681 | 0.642876 | -1.55551 |
| Cisd1         | BC013522     | 0.000116549 | 0.64264  | -1.55608 |
| 2410131K14Rik | BC104372     | 1.02E-05    | 0.642245 | -1.55704 |
| Kpna3         | NM_008466    | 0.000816538 | 0.641996 | -1.55764 |
| Exog          | NM_172456    | 0.00032689  | 0.641822 | -1.55806 |
| Nt5c3         | NM_026004    | 0.00055638  | 0.641084 | -1.55986 |
| Cit           | NM_007708    | 0.00058308  | 0.639519 | -1.56368 |
| Timeless      | NM_001136082 | 0.000652415 | 0.639312 | -1.56418 |
| Pus7l         | NM_172437    | 0.000155742 | 0.638989 | -1.56497 |
| Csrp2bp       | NM_181417    | 8.74E-06    | 0.638979 | -1.565   |
| Cenpl         | NM_027429    | 0.000813285 | 0.638385 | -1.56645 |
| Chd1          | NM_007690    | 9.29E-06    | 0.637624 | -1.56832 |
| Pygb          | NM_153781    | 0.000100948 | 0.637446 | -1.56876 |
| Wars2         | NM_027462    | 3.74E-05    | 0.63722  | -1.56932 |
| Zfp111        | NM_019940    | 0.000119716 | 0.636843 | -1.57025 |
| Oxa1l         | NM_026936    | 8.19E-05    | 0.635697 | -1.57308 |

|               |              |             |          |          |
|---------------|--------------|-------------|----------|----------|
| Armc6         | NM_133972    | 9.12E-06    | 0.635067 | -1.57464 |
| Phf6          | NM_027642    | 0.000118613 | 0.634764 | -1.57539 |
| Mtf2          | NM_013827    | 8.74E-05    | 0.634258 | -1.57665 |
| Nxt1          | NM_001110159 | 8.64E-05    | 0.634183 | -1.57683 |
| Thoc3         | NM_028597    | 0.000164093 | 0.633895 | -1.57755 |
| Rrm1          | NM_009103    | 0.000184206 | 0.632675 | -1.58059 |
| Tut1          | NM_197993    | 0.000568217 | 0.632376 | -1.58134 |
| A430033K04Rik | NM_183025    | 9.29E-05    | 0.631776 | -1.58284 |
| BC005561      | NM_001166581 | 7.35E-05    | 0.630735 | -1.58545 |
| Nudcd3        | NM_173748    | 1.23E-05    | 0.630594 | -1.58581 |
| Scamp4        | NM_019575    | 7.66E-08    | 0.630556 | -1.5859  |
| Npm1          | NM_008722    | 7.28E-05    | 0.630221 | -1.58675 |
| Cdkn2c        | NM_007671    | 0.000643709 | 0.630195 | -1.58681 |
| Cnot2         | NM_001037846 | 7.89E-06    | 0.630009 | -1.58728 |
| Wdr3          | NM_175552    | 5.64E-06    | 0.629551 | -1.58843 |
| Snx8          | NM_172277    | 4.22E-06    | 0.626811 | -1.59538 |
| Zfp1          | NM_001037665 | 3.23E-06    | 0.626577 | -1.59597 |
| Prkaa1        | NM_001013367 | 2.35E-05    | 0.625969 | -1.59752 |
| Zzz3          | NM_198416    | 2.73E-05    | 0.62553  | -1.59864 |
| Utp15         | NM_178918    | 5.80E-05    | 0.624544 | -1.60117 |
| Sele          | NM_011345    | 1.11E-05    | 0.624243 | -1.60194 |
| Cdkn2aipnl    | NM_029976    | 6.34E-05    | 0.624118 | -1.60226 |
| Pms1          | NM_153556    | 1.72E-05    | 0.623669 | -1.60342 |
| Lsm11         | NM_028185    | 0.000730307 | 0.62356  | -1.60369 |
| 2010305A19Rik | NM_027250    | 0.000792496 | 0.622542 | -1.60632 |
| Atp2b1        | NM_026482    | 3.64E-05    | 0.622482 | -1.60647 |
| Nono          | NM_023144    | 1.39E-06    | 0.621564 | -1.60884 |
| Chaf1b        | NM_028083    | 0.000684632 | 0.621026 | -1.61024 |
| Dcps          | NM_027030    | 0.000888427 | 0.620651 | -1.61121 |
| Snhg1         | AK051045     | 5.91E-05    | 0.62057  | -1.61142 |
| L3mbtl2       | NM_145993    | 5.31E-06    | 0.620194 | -1.6124  |
| Zdhhc16       | NM_023740    | 0.000172699 | 0.61992  | -1.61311 |
| Itch          | NM_008395    | 9.12E-06    | 0.619249 | -1.61486 |
| Mnd1          | NM_029797    | 3.10E-05    | 0.618711 | -1.61626 |
| Zfp142        | NM_029888    | 0.000393034 | 0.618565 | -1.61665 |
| Wbscr16       | NM_033572    | 9.99E-05    | 0.618414 | -1.61704 |
| Ccdc99        | NM_027411    | 0.000325821 | 0.618364 | -1.61717 |
| Hmbs          | NM_013551    | 7.18E-05    | 0.618338 | -1.61724 |
| Ube2c         | NM_026785    | 0.000698704 | 0.618155 | -1.61772 |
| U2af1         | NM_024187    | 0.000195624 | 0.617384 | -1.61974 |
| Rce1          | NM_023131    | 0.000253636 | 0.617183 | -1.62026 |
| Rrp12         | NM_199447    | 5.92E-06    | 0.616382 | -1.62237 |
| Dek           | NM_025900    | 4.74E-05    | 0.616322 | -1.62253 |

|               |              |             |          |          |
|---------------|--------------|-------------|----------|----------|
| Dars2         | NM_172644    | 0.000271625 | 0.615604 | -1.62442 |
| Cops5         | NM_013715    | 5.40E-05    | 0.615568 | -1.62452 |
| Exosc8        | NM_001163570 | 0.00051083  | 0.615057 | -1.62587 |
| Pusl1         | NM_001033490 | 5.25E-07    | 0.614756 | -1.62666 |
| Nudt16l1      | NM_025839    | 6.09E-06    | 0.614625 | -1.62701 |
| D19Bwg1357e   | NM_177474    | 2.20E-06    | 0.613859 | -1.62904 |
| Clpp          | NM_017393    | 0.000854808 | 0.612624 | -1.63232 |
| Utp18         | NM_001013375 | 7.72E-05    | 0.612435 | -1.63283 |
| Rad51ap1      | NM_009013    | 0.000573764 | 0.61231  | -1.63316 |
| Dclk1         | NM_019978    | 3.92E-05    | 0.612289 | -1.63322 |
| Mylip         | NM_153789    | 6.85E-06    | 0.611803 | -1.63451 |
| Frs2          | NM_177798    | 3.62E-05    | 0.610752 | -1.63733 |
| Bclaf1        | NM_001025392 | 3.57E-06    | 0.60975  | -1.64002 |
| 9430008C03Rik | AK133696     | 0.000168771 | 0.608587 | -1.64315 |
| Eif2b4        | NM_001127356 | 7.36E-06    | 0.607285 | -1.64667 |
| Utp6          | NM_144826    | 6.02E-05    | 0.607228 | -1.64683 |
| Foxn2         | NM_180974    | 2.82E-06    | 0.606878 | -1.64778 |
| Sytl5         | NM_177704    | 0.00013063  | 0.606422 | -1.64902 |
| Tcf3          | NM_001164147 | 1.94E-07    | 0.605863 | -1.65054 |
| Dis3          | NM_028315    | 0.000415447 | 0.605313 | -1.65204 |
| Thop1         | NM_022653    | 3.51E-06    | 0.605201 | -1.65234 |
| Rad23b        | NM_009011    | 1.25E-05    | 0.604789 | -1.65347 |
| D10Wsu52e     | BC003288     | 5.67E-06    | 0.604296 | -1.65482 |
| Abcb6         | NM_023732    | 0.000199979 | 0.604042 | -1.65552 |
| 4930503L19Rik | BC057927     | 1.09E-05    | 0.604036 | -1.65553 |
| BC003331      | NM_145511    | 0.000189527 | 0.603263 | -1.65765 |
| Brd8          | NM_030147    | 0.00023428  | 0.602922 | -1.65859 |
| U2af1l4       | NM_170760    | 6.85E-05    | 0.602322 | -1.66024 |
| Atic          | NM_026195    | 6.66E-05    | 0.60154  | -1.6624  |
| Slc25a30      | NM_026232    | 6.12E-05    | 0.601513 | -1.66247 |
| Cytsb         | NM_001029936 | 0.000134598 | 0.600773 | -1.66452 |
| Slc6a17       | NM_172271    | 0.000178731 | 0.600143 | -1.66627 |
| Foxm1         | NM_008021    | 5.79E-05    | 0.599902 | -1.66694 |
| Ppil4         | NM_026141    | 0.00079538  | 0.59975  | -1.66736 |
| Grk6          | NM_001038018 | 0.000488148 | 0.599434 | -1.66824 |
| Usp37         | NM_176972    | 1.11E-05    | 0.598553 | -1.6707  |
| Rcc1          | NM_133878    | 3.01E-05    | 0.598083 | -1.67201 |
| Shq1          | NM_181590    | 0.000568459 | 0.596552 | -1.6763  |
| Xpo7          | NM_023045    | 0.00013062  | 0.595508 | -1.67924 |
| Taf1          | NM_001081008 | 0.00036529  | 0.593425 | -1.68513 |
| Pot1a         | NM_133931    | 0.000575856 | 0.593377 | -1.68527 |
| Isy1          | NM_133934    | 1.83E-06    | 0.592662 | -1.6873  |
| Rrp8          | NM_025897    | 1.06E-06    | 0.592412 | -1.68802 |

|               |              |             |          |          |
|---------------|--------------|-------------|----------|----------|
| Gadd45g       | NM_011817    | 1.77E-06    | 0.590847 | -1.69248 |
| Mett5d1       | NM_029790    | 0.000111237 | 0.590763 | -1.69272 |
| Fam123b       | NM_175179    | 1.10E-05    | 0.590345 | -1.69393 |
| Rbm39         | NM_133242    | 3.50E-06    | 0.588755 | -1.6985  |
| Slc35b4       | NM_021435    | 3.47E-06    | 0.587758 | -1.70138 |
| Cyp39a1       | NM_018887    | 1.33E-05    | 0.5876   | -1.70184 |
| Rqcd1         | NM_021383    | 2.06E-05    | 0.587311 | -1.70268 |
| Prkrir        | NM_028410    | 2.80E-05    | 0.586886 | -1.70391 |
| Tmem109       | NM_134142    | 5.01E-05    | 0.586722 | -1.70438 |
| Ddx49         | NM_001024922 | 4.32E-05    | 0.585273 | -1.7086  |
| Ankle2        | NM_027922    | 2.67E-05    | 0.585233 | -1.70872 |
| Zfp827        | NM_178267    | 8.24E-05    | 0.584633 | -1.71047 |
| Fam98a        | NM_133747    | 4.62E-08    | 0.584601 | -1.71057 |
| Bat1a         | NM_019693    | 2.51E-06    | 0.584325 | -1.71138 |
| Morc2a        | NM_001159288 | 4.46E-05    | 0.584275 | -1.71152 |
| Nup37         | NM_028334    | 0.000124051 | 0.583972 | -1.71241 |
| Ccdc41        | NM_029852    | 1.14E-06    | 0.58396  | -1.71245 |
| Zfp91-Cntf    | NR_024093    | 1.21E-06    | 0.583671 | -1.71329 |
| Melk          | NM_010790    | 0.000713065 | 0.583191 | -1.7147  |
| Ska1          | NM_025581    | 0.000129998 | 0.582879 | -1.71562 |
| Zfp161        | NM_009547    | 8.37E-07    | 0.582383 | -1.71708 |
| Ccdc112       | NM_001160399 | 5.30E-05    | 0.580511 | -1.72262 |
| Ncapd3        | NM_178113    | 0.000282944 | 0.580403 | -1.72294 |
| Zc3hav1l      | NM_172467    | 0.000513332 | 0.580085 | -1.72389 |
| Gm8681        | XR_032130    | 7.64E-06    | 0.579374 | -1.726   |
| Wdr59         | NM_001170743 | 3.54E-05    | 0.57922  | -1.72646 |
| 5730601F06Rik | NM_001082485 | 0.00011505  | 0.579105 | -1.7268  |
| Scfd1         | NM_029825    | 4.13E-05    | 0.577969 | -1.7302  |
| Acbd6         | NM_028250    | 2.97E-05    | 0.577081 | -1.73286 |
| Sfrs2ip       | NM_028148    | 5.04E-06    | 0.577035 | -1.733   |
| Whsc2         | NM_011914    | 5.63E-06    | 0.576977 | -1.73317 |
| Magi3         | NM_133853    | 0.000209024 | 0.576933 | -1.7333  |
| Slc19a1       | NM_031196    | 9.51E-05    | 0.575608 | -1.73729 |
| Dcp2          | NM_027490    | 7.01E-05    | 0.573107 | -1.74488 |
| Naa25         | NM_172722    | 2.06E-05    | 0.571382 | -1.75014 |
| Aimp2         | NM_001172146 | 7.95E-06    | 0.571145 | -1.75087 |
| G3bp1         | NM_013716    | 1.51E-05    | 0.570811 | -1.75189 |
| Nbn           | NM_013752    | 8.20E-05    | 0.570383 | -1.75321 |
| Tk1           | NM_009387    | 5.80E-06    | 0.569558 | -1.75575 |
| Sart3         | NM_016926    | 0.000373859 | 0.569166 | -1.75696 |
| Sfxn1         | NM_027324    | 2.33E-06    | 0.568774 | -1.75817 |
| Rfc1          | NM_011258    | 0.000113002 | 0.568538 | -1.7589  |
| Ahctf1        | NM_026375    | 3.22E-07    | 0.568269 | -1.75973 |

|               |                    |             |          |          |
|---------------|--------------------|-------------|----------|----------|
| Tsr1          | NM_177325          | 1.49E-06    | 0.567252 | -1.76288 |
| Urb1          | NM_029497          | 0.000110481 | 0.566894 | -1.764   |
| Cask          | NM_009806          | 1.87E-05    | 0.566725 | -1.76453 |
| Polr1a        | NM_009088          | 2.70E-06    | 0.564906 | -1.77021 |
| Senp1         | NM_144851          | 0.000378406 | 0.564878 | -1.77029 |
| Alx1          | NM_172553          | 4.82E-05    | 0.562636 | -1.77735 |
| Prkd3         | NM_001171004       | 4.00E-05    | 0.562139 | -1.77892 |
| Snx7          | NM_029655          | 1.55E-07    | 0.561305 | -1.78156 |
| Cpne1         | NM_170588          | 3.88E-06    | 0.561    | -1.78253 |
| Ppap2a        | NM_008247          | 0.000190051 | 0.560095 | -1.78541 |
| Mmgt2         | NM_175002          | 2.64E-06    | 0.559875 | -1.78611 |
| Fbxl19        | NM_172748          | 5.38E-06    | 0.559081 | -1.78865 |
| Heatr3        | NM_172757          | 7.61E-06    | 0.556022 | -1.79849 |
| Zc3h7a        | NM_145931          | 2.38E-06    | 0.555289 | -1.80087 |
| Gtpbp10       | NM_153116          | 0.000456515 | 0.555013 | -1.80176 |
| Pcm1          | NM_023662          | 1.24E-05    | 0.553791 | -1.80574 |
| Gar1          | NM_026578          | 9.57E-05    | 0.553642 | -1.80622 |
| Zfp828        | NM_181854          | 1.05E-08    | 0.553205 | -1.80765 |
| Ept1          | NM_027652          | 2.32E-07    | 0.553176 | -1.80774 |
| Htatsf1       | NM_028242          | 0.00037365  | 0.552985 | -1.80837 |
| Rif1          | NM_175238          | 5.09E-05    | 0.550863 | -1.81533 |
| Ebna1bp2      | NM_026932          | 9.01E-07    | 0.550484 | -1.81658 |
| Nav3          | NM_001081035       | 9.67E-06    | 0.54985  | -1.81868 |
| Rpa2          | NM_011284          | 0.000665095 | 0.547415 | -1.82677 |
| Taok2         | NM_001163774       | 2.07E-06    | 0.547077 | -1.8279  |
| Tmpo          | NM_001080129       | 8.16E-05    | 0.54696  | -1.82829 |
| Lpcat1        | NM_145376          | 5.56E-05    | 0.546801 | -1.82882 |
| Cdk1          | NM_007659          | 0.000720494 | 0.546388 | -1.8302  |
| Map2k6        | NM_011943          | 4.23E-05    | 0.543849 | -1.83874 |
| Sip1          | NM_025656          | 5.23E-05    | 0.543452 | -1.84009 |
| 3110082117Rik | NM_028469          | 5.29E-08    | 0.540925 | -1.84868 |
| Eml1          | NM_001043335       | 5.78E-06    | 0.540627 | -1.8497  |
| Gtpbp4        | ENSMUST00000021574 | 5.63E-07    | 0.539991 | -1.85188 |
| Fen1          | NM_007999          | 0.000758167 | 0.539782 | -1.8526  |
| Pfas          | NM_001159519       | 1.98E-05    | 0.5397   | -1.85288 |
| Thg1l         | NM_001080969       | 1.42E-05    | 0.539688 | -1.85292 |
| Fancd2        | NM_001033244       | 0.000418201 | 0.539507 | -1.85354 |
| Irs1          | NM_010570          | 3.68E-05    | 0.539433 | -1.8538  |
| Lrp8          | NR_033496          | 4.70E-05    | 0.539138 | -1.85481 |
| Slc11a2       | NM_001146161       | 3.34E-06    | 0.539056 | -1.85509 |
| Sass6         | NM_028349          | 0.000915724 | 0.539038 | -1.85516 |
| Gas8          | NM_018855          | 7.25E-06    | 0.538918 | -1.85557 |
| BC026590      | BC026590           | 0.00051251  | 0.53876  | -1.85611 |

|         |              |             |          |          |
|---------|--------------|-------------|----------|----------|
| Pds5b   | NM_175310    | 0.000201    | 0.53815  | -1.85822 |
| Psmg1   | NM_019537    | 0.000119462 | 0.537181 | -1.86157 |
| Nob1    | NM_026277    | 6.38E-05    | 0.536147 | -1.86516 |
| Gmn     | NM_020567    | 9.29E-05    | 0.534048 | -1.87249 |
| Snora65 | NR_002898    | 0.000111787 | 0.533779 | -1.87343 |
| Gm13487 | XR_034337    | 1.24E-05    | 0.533014 | -1.87612 |
| Ska2l   | XM_890112    | 0.000124025 | 0.532363 | -1.87842 |
| Mlst8   | NM_019988    | 1.69E-06    | 0.532077 | -1.87943 |
| Dkk2    | NM_020265    | 0.000591294 | 0.531747 | -1.88059 |
| Mcm2    | NM_008564    | 8.11E-05    | 0.529345 | -1.88913 |
| Cep135  | NM_199032    | 0.000815738 | 0.529281 | -1.88936 |
| Zc4h2   | NM_001003916 | 0.000350639 | 0.526985 | -1.89759 |
| Polh    | NM_030715    | 2.22E-05    | 0.525984 | -1.9012  |
| Tcerg1  | NM_001039474 | 1.05E-05    | 0.524178 | -1.90775 |
| Pus3    | NM_023292    | 0.000416903 | 0.521477 | -1.91763 |
| Alg3    | NM_145939    | 2.55E-05    | 0.521412 | -1.91787 |
| Polq    | NM_029977    | 0.000604755 | 0.521302 | -1.91827 |
| Traf5   | NM_011633    | 2.06E-05    | 0.520535 | -1.9211  |
| Bok     | NM_016778    | 9.07E-06    | 0.520166 | -1.92246 |
| Ddx11   | NM_001003919 | 0.000145406 | 0.519689 | -1.92423 |
| Adam12  | NM_007400    | 6.55E-06    | 0.518981 | -1.92685 |
| Fastkd1 | NM_177244    | 4.10E-06    | 0.518452 | -1.92882 |
| Zfp788  | NM_023363    | 9.08E-06    | 0.516423 | -1.9364  |
| Naa15   | NM_053089    | 4.91E-05    | 0.514339 | -1.94424 |
| Etaa1   | NM_026576    | 0.000466309 | 0.514181 | -1.94484 |
| Fdft1   | NM_010191    | 0.000650332 | 0.513362 | -1.94794 |
| Zik1    | NM_009577    | 0.000113639 | 0.512902 | -1.94969 |
| Sgtb    | NM_144838    | 0.000219638 | 0.512576 | -1.95093 |
| Sfrs2   | NM_011358    | 1.36E-05    | 0.510535 | -1.95873 |
| Brc3    | NM_001166457 | 3.52E-05    | 0.510508 | -1.95883 |
| Jmjd5   | NM_029842    | 3.38E-07    | 0.510139 | -1.96025 |
| Trim59  | NM_025863    | 4.77E-06    | 0.509938 | -1.96102 |
| Itgb8   | NM_177290    | 4.26E-05    | 0.50943  | -1.96298 |
| Fancb   | NM_001146081 | 0.000334671 | 0.509043 | -1.96447 |
| Nle1    | NM_145431    | 3.24E-05    | 0.508805 | -1.96539 |
| Grwd1   | NM_153419    | 1.85E-06    | 0.508182 | -1.9678  |
| Sgol1   | NM_028232    | 0.000653488 | 0.507957 | -1.96867 |
| Apitd1  | NM_027263    | 4.67E-06    | 0.507925 | -1.9688  |
| Hmgcs1  | NM_145942    | 0.000730092 | 0.507026 | -1.97229 |
| Fam33a  | NM_025377    | 7.65E-05    | 0.506801 | -1.97316 |
| Lsm14a  | NM_025948    | 4.79E-06    | 0.505903 | -1.97666 |
| Pgap1   | NM_001163314 | 0.000555954 | 0.505832 | -1.97694 |
| Mapk8   | NM_016700    | 6.21E-06    | 0.505407 | -1.9786  |

|               |              |             |          |          |
|---------------|--------------|-------------|----------|----------|
| E330016A19Rik | BC052196     | 5.63E-07    | 0.504818 | -1.98091 |
| Bccip         | NM_025392    | 5.20E-05    | 0.504373 | -1.98266 |
| Kif22         | NM_145588    | 0.000478441 | 0.504083 | -1.9838  |
| Suv39h2       | NM_022724    | 6.69E-07    | 0.499918 | -2.00033 |
| Arhgap5       | NM_009706    | 7.85E-06    | 0.499497 | -2.00201 |
| Nop2          | NM_138747    | 9.38E-07    | 0.498025 | -2.00793 |
| Mybbp1a       | NM_016776    | 4.51E-07    | 0.497068 | -2.0118  |
| Ddx21         | NM_019553    | 2.18E-06    | 0.496598 | -2.0137  |
| Nup54         | NM_183392    | 8.82E-06    | 0.496388 | -2.01455 |
| 4930547N16Rik | NM_029249    | 0.000403007 | 0.496054 | -2.01591 |
| Dsn1          | NM_025853    | 0.000107752 | 0.493384 | -2.02682 |
| Mdn1          | NM_001081392 | 1.74E-06    | 0.493338 | -2.02701 |
| Rpl12         | BC075731     | 0.000181141 | 0.49329  | -2.02721 |
| Ifrd2         | NM_025903    | 5.04E-05    | 0.491597 | -2.03419 |
| Bub1          | NM_001113179 | 0.000366661 | 0.489706 | -2.04204 |
| Rpl23a        | AF357367     | 6.84E-05    | 0.485908 | -2.058   |
| Gpatch4       | NM_025663    | 3.66E-06    | 0.485848 | -2.05826 |
| Bcs1l         | NM_025784    | 1.57E-05    | 0.483419 | -2.0686  |
| Zfp81         | NM_207541    | 0.000304388 | 0.483324 | -2.069   |
| Nsmce4a       | NM_001162855 | 5.09E-05    | 0.482847 | -2.07105 |
| Zfp566        | NM_152814    | 2.22E-05    | 0.482519 | -2.07246 |
| Prkg1         | NM_001013833 | 1.34E-05    | 0.482166 | -2.07397 |
| Lrch2         | NM_001081173 | 9.92E-05    | 0.480417 | -2.08153 |
| Ttl           | NM_027192    | 2.14E-05    | 0.479625 | -2.08496 |
| Pold3         | NM_133692    | 0.000412445 | 0.479145 | -2.08705 |
| Farsb         | NM_011811    | 2.39E-06    | 0.478618 | -2.08935 |
| Rad51c        | NM_053269    | 0.00059056  | 0.477859 | -2.09267 |
| BC027231      | BC027231     | 1.85E-06    | 0.474823 | -2.10605 |
| Mrpl50        | NM_178603    | 1.49E-05    | 0.473749 | -2.11082 |
| Utp14a        | NM_028276    | 7.21E-05    | 0.472013 | -2.11858 |
| Taf1d         | BC110660     | 5.83E-06    | 0.470037 | -2.12749 |
| Erlin1        | NM_145502    | 4.11E-05    | 0.469991 | -2.1277  |
| Smyd3         | NM_027188    | 4.96E-05    | 0.469273 | -2.13096 |
| Lpar4         | NM_175271    | 2.58E-05    | 0.469224 | -2.13118 |
| Nat10         | NM_153126    | 2.26E-06    | 0.467233 | -2.14026 |
| Grem1         | NM_011824    | 1.21E-06    | 0.466196 | -2.14502 |
| Tmem209       | NM_178625    | 2.39E-05    | 0.463293 | -2.15846 |
| Brca1         | NM_009764    | 0.00052718  | 0.462099 | -2.16404 |
| Ivns1abp      | NM_054102    | 3.18E-05    | 0.461925 | -2.16485 |
| Alg8          | NM_199035    | 4.24E-06    | 0.45951  | -2.17623 |
| Me2           | NM_145494    | 0.00071457  | 0.459043 | -2.17844 |
| Snord14a      | NR_028273    | 0.000443498 | 0.45656  | -2.19029 |
| Atad5         | NM_001029856 | 0.000179708 | 0.455814 | -2.19388 |

|               |                    |             |          |          |
|---------------|--------------------|-------------|----------|----------|
| 5730590G19Rik | NM_029835          | 6.46E-05    | 0.45576  | -2.19414 |
| Nol8          | NM_001081350       | 8.74E-07    | 0.455611 | -2.19486 |
| Clspn         | NM_175554          | 5.60E-05    | 0.455033 | -2.19764 |
| Nol10         | NM_001008421       | 5.24E-07    | 0.454315 | -2.20112 |
| 2310061I04Rik | NM_001033630       | 1.91E-05    | 0.453561 | -2.20477 |
| Kif18a        | NM_139303          | 0.000413615 | 0.452564 | -2.20963 |
| Brca2         | NM_001081001       | 2.56E-05    | 0.452004 | -2.21237 |
| 6720463M24Rik | NM_175265          | 1.38E-05    | 0.449262 | -2.22587 |
| Snx5          | NM_024225          | 1.57E-07    | 0.448089 | -2.2317  |
| Nolc1         | NM_053086          | 5.82E-08    | 0.447723 | -2.23352 |
| Ttc26         | NM_153600          | 3.25E-05    | 0.446633 | -2.23897 |
| Meis1         | NM_010789          | 7.56E-05    | 0.446562 | -2.23933 |
| Ammecr1       | NM_019496          | 1.26E-06    | 0.440708 | -2.26908 |
| Aatf          | NM_019816          | 3.64E-07    | 0.440303 | -2.27116 |
| Bmpr1b        | NM_007560          | 1.74E-05    | 0.439988 | -2.27279 |
| lqcb1         | NM_177128          | 1.83E-05    | 0.436803 | -2.28936 |
| Tmem120b      | NM_001039723       | 3.66E-09    | 0.433645 | -2.30603 |
| Mtrr          | NM_172480          | 7.13E-06    | 0.43337  | -2.3075  |
| Cdt1          | NM_026014          | 1.12E-05    | 0.432322 | -2.31309 |
| Mfsd2a        | NM_029662          | 0.000383227 | 0.432045 | -2.31457 |
| Ttll4         | NM_001014974       | 4.27E-07    | 0.429396 | -2.32885 |
| Ckap2l        | NM_181589          | 0.000467167 | 0.429087 | -2.33053 |
| Haus1         | NM_146089          | 1.78E-05    | 0.428707 | -2.3326  |
| 9930014A18Rik | NR_030696          | 1.08E-05    | 0.428443 | -2.33403 |
| Gemin5        | NM_001166669       | 1.06E-06    | 0.42839  | -2.33432 |
| Srcap         | ENSMUST00000084563 | 5.70E-06    | 0.425697 | -2.34909 |
| Cdc6          | NM_011799          | 0.000165189 | 0.424686 | -2.35468 |
| Mex3b         | NM_175366          | 1.46E-05    | 0.424469 | -2.35589 |
| Pdgfrb        | NM_001146268       | 8.27E-06    | 0.423798 | -2.35961 |
| Zfp146        | NM_011980          | 6.45E-06    | 0.423575 | -2.36085 |
| Smchd1        | NM_028887          | 3.82E-05    | 0.423024 | -2.36393 |
| C79407        | NM_172578          | 0.000542888 | 0.421098 | -2.37474 |
| Zfx4          | NM_030708          | 4.00E-05    | 0.420877 | -2.37599 |
| BC048355      | NM_207161          | 1.07E-06    | 0.420576 | -2.37769 |
| 1810030O07Rik | BC137660           | 1.62E-06    | 0.419916 | -2.38143 |
| Cdh11         | NM_009866          | 1.25E-05    | 0.416204 | -2.40267 |
| Lyplal1       | NM_146106          | 1.24E-07    | 0.414619 | -2.41185 |
| Pold1         | NM_011131          | 0.000248059 | 0.413389 | -2.41903 |
| Lbr           | NM_133815          | 4.63E-05    | 0.411853 | -2.42805 |
| Fibin         | NM_026271          | 0.000402477 | 0.410791 | -2.43433 |
| Ttk           | NM_009445          | 0.00014235  | 0.409845 | -2.43995 |
| Mecom         | NM_007963          | 1.76E-05    | 0.407157 | -2.45605 |
| Cdca8         | NM_026560          | 1.70E-05    | 0.403697 | -2.4771  |



|               |              |             |          |          |
|---------------|--------------|-------------|----------|----------|
| Gen1          | NM_177331    | 0.000481777 | 0.40321  | -2.4801  |
| Lanc12        | NM_133737    | 3.40E-05    | 0.402868 | -2.4822  |
| Pdxk          | NM_172134    | 6.50E-07    | 0.402009 | -2.48751 |
| Rpp14         | NM_025938    | 5.78E-06    | 0.398906 | -2.50685 |
| Plk4          | NM_011495    | 6.54E-06    | 0.396836 | -2.51993 |
| 2610002D18Rik | BC138271     | 1.93E-05    | 0.395914 | -2.5258  |
| Nipal1        | NM_001081205 | 1.60E-08    | 0.395596 | -2.52783 |
| Figl1         | NM_001163359 | 0.00043358  | 0.395089 | -2.53108 |
| Gtdc1         | NM_172662    | 2.46E-05    | 0.392449 | -2.5481  |
| Tars          | NM_033074    | 9.95E-06    | 0.389821 | -2.56528 |
| Uhrf1         | NM_010931    | 2.34E-06    | 0.389382 | -2.56817 |
| Depdc1a       | NM_001172092 | 5.64E-05    | 0.388592 | -2.57339 |
| Rrp1b         | NM_028244    | 3.81E-05    | 0.387515 | -2.58055 |
| Gas2l3        | NM_001033331 | 7.94E-05    | 0.384261 | -2.6024  |
| Trip13        | NM_027182    | 5.94E-05    | 0.383716 | -2.6061  |
| Zeb2          | NM_015753    | 2.19E-06    | 0.381739 | -2.61959 |
| Tbl1xr1       | NM_030732    | 0.000121916 | 0.380704 | -2.62671 |
| Nup107        | NM_134010    | 5.72E-05    | 0.380619 | -2.6273  |
| Ints7         | NM_178632    | 0.000120569 | 0.366936 | -2.72527 |
| Mtbp          | NM_134092    | 0.00012588  | 0.364842 | -2.74091 |
| Hist1h1b      | NM_020034    | 2.28E-05    | 0.36451  | -2.74341 |
| Exo1          | NM_012012    | 0.000371334 | 0.364486 | -2.74359 |
| Rpp40         | NM_145938    | 2.65E-07    | 0.36444  | -2.74393 |
| Ing5          | NM_025454    | 3.64E-07    | 0.364198 | -2.74576 |
| Trmt61a       | NM_177374    | 1.75E-08    | 0.364085 | -2.74661 |
| Ncapg2        | NM_133762    | 0.00071348  | 0.36025  | -2.77585 |
| Ercc6l        | NM_146235    | 4.61E-05    | 0.359879 | -2.77872 |
| Alg2          | NM_019998    | 1.17E-05    | 0.35685  | -2.8023  |
| Ccnb2         | NM_007630    | 1.25E-05    | 0.356608 | -2.8042  |
| Gnl3          | NM_153547    | 5.13E-10    | 0.355857 | -2.81012 |
| Kif20b        | NM_183046    | 0.000225506 | 0.354484 | -2.821   |
| Npr3          | NM_008728    | 0.000589021 | 0.349548 | -2.86084 |
| Wee1          | NM_009516    | 3.62E-08    | 0.347323 | -2.87916 |
| Nek2          | NM_010892    | 7.85E-05    | 0.344594 | -2.90197 |
| Mki67         | NM_001081117 | 3.72E-05    | 0.343545 | -2.91083 |
| Zcchc8        | NM_027494    | 3.59E-05    | 0.337976 | -2.95879 |
| Rabggtb       | NR_028095    | 1.11E-07    | 0.337853 | -2.95987 |
| Ndufaf4       | NM_026742    | 5.25E-06    | 0.328675 | -3.04252 |
| Kif11         | NM_010615    | 0.000118703 | 0.322626 | -3.09957 |
| Mmp16         | NM_019724    | 0.000153618 | 0.320829 | -3.11693 |
| Snord87       | NR_004410    | 2.18E-05    | 0.317986 | -3.1448  |
| Edn1          | NM_010104    | 2.94E-06    | 0.315611 | -3.16846 |
| Sfrs1         | NM_173374    | 1.82E-05    | 0.315264 | -3.17195 |

|               |              |             |          |          |
|---------------|--------------|-------------|----------|----------|
| Casc5         | NM_029617    | 3.22E-05    | 0.28874  | -3.46332 |
| Adamts6       | NM_001081020 | 3.95E-05    | 0.286631 | -3.48881 |
| Polr1b        | NM_009086    | 2.20E-07    | 0.286278 | -3.49311 |
| Adamts5       | NM_011782    | 2.40E-05    | 0.274426 | -3.64397 |
| 2810026P18Rik | BC032970     | 5.46E-07    | 0.236381 | -4.23046 |
| Nuf2          | NM_023284    | 7.86E-05    | 0.215995 | -4.62975 |
| Pcdh18        | NM_130448    | 4.29E-07    | 0.193581 | -5.16581 |
| Rgs4          | NM_009062    | 0.000111195 | 0.190194 | -5.25779 |

**Supplementary Table 3**

| Gene Symbol   | RefSeq       | p-value(p53wt, Adr vs. p53wt, Ctr) | Ratio(p53wt, Adr vs. p53wt, Ctr) | Fold-Change(p53wt, Adr vs. p53wt, Ctr) |
|---------------|--------------|------------------------------------|----------------------------------|----------------------------------------|
| Them5         | NM_025416    | 1.22E-12                           | 21.3949                          | 21.3949                                |
| Gpx6          | NM_145451    | 1.45E-10                           | 11.6978                          | 11.6978                                |
| Krt5          | NM_027011    | 2.93E-12                           | 9.43466                          | 9.43466                                |
| Plk2          | NM_152804    | 1.53E-09                           | 8.56309                          | 8.56309                                |
| Dux           | NM_001081954 | 2.09E-11                           | 8.3839                           | 8.3839                                 |
| Dvwa          | NM_026763    | 1.70E-10                           | 8.07858                          | 8.07858                                |
| 4933403O03Rik | NR_033485    | 6.49E-10                           | 7.89833                          | 7.89833                                |
| Ano7          | NM_207031    | 3.90E-11                           | 7.71618                          | 7.71618                                |
| Egfr          | NM_207655    | 6.51E-12                           | 7.25881                          | 7.25881                                |
| Ttll6         | NM_172799    | 2.83E-11                           | 7.17546                          | 7.17546                                |
| Gm5737        | XM_488079    | 6.61E-12                           | 6.68511                          | 6.68511                                |
| Anxa8         | NM_013473    | 5.04E-11                           | 6.56138                          | 6.56138                                |
| Fbp2          | NM_007994    | 1.85E-08                           | 6.52976                          | 6.52976                                |
| Fbxo39        | NM_001099688 | 1.10E-09                           | 6.42974                          | 6.42974                                |
| Apol8         | NM_001081970 | 4.27E-12                           | 6.42708                          | 6.42708                                |
| Ccdc81        | NM_001162979 | 1.32E-10                           | 6.19776                          | 6.19776                                |
| Npnt          | NM_033525    | 1.10E-10                           | 6.00453                          | 6.00453                                |
| Casp14        | NM_009809    | 1.01E-10                           | 5.98641                          | 5.98641                                |
| Gpx3          | NM_001083929 | 2.02E-10                           | 5.98397                          | 5.98397                                |
| Plcd4         | NM_001081456 | 5.40E-11                           | 5.97477                          | 5.97477                                |
| Eef1a2        | NM_007906    | 1.35E-10                           | 5.89947                          | 5.89947                                |
| Greb1l        | NM_001083628 | 8.45E-11                           | 5.8202                           | 5.8202                                 |
| Svop          | NM_026805    | 4.37E-09                           | 5.79075                          | 5.79075                                |
| Itga8         | NM_001001309 | 2.56E-09                           | 5.78685                          | 5.78685                                |
| Matn1         | NM_010769    | 6.47E-11                           | 5.78534                          | 5.78534                                |
| Chrn4         | NM_148944    | 5.42E-08                           | 5.70109                          | 5.70109                                |
| Gna15         | NM_010304    | 1.40E-13                           | 5.68518                          | 5.68518                                |
| Tmem40        | NM_001168256 | 1.52E-10                           | 5.64387                          | 5.64387                                |
| H2-t9         | NM_001177467 | 8.34E-09                           | 5.62773                          | 5.62773                                |
| Plch2         | NM_175556    | 2.59E-10                           | 5.47825                          | 5.47825                                |
| Gnal          | NM_010307    | 7.56E-12                           | 5.38222                          | 5.38222                                |
| Trp73         | NM_011642    | 2.60E-09                           | 5.16808                          | 5.16808                                |
| Retsat        | NM_026159    | 3.67E-11                           | 5.13832                          | 5.13832                                |
| Ripk4         | NM_023663    | 1.79E-09                           | 5.03264                          | 5.03264                                |
| Adam8         | NM_007403    | 2.54E-11                           | 4.89961                          | 4.89961                                |
| Spib          | NM_019866    | 1.62E-08                           | 4.80157                          | 4.80157                                |
| Itgb2         | NM_008404    | 1.34E-11                           | 4.79643                          | 4.79643                                |
| Shpk          | NM_029031    | 1.25E-09                           | 4.74218                          | 4.74218                                |
| Arhgef16      | NM_001112744 | 1.66E-09                           | 4.72031                          | 4.72031                                |
| Fbp1          | NM_019395    | 5.57E-10                           | 4.61117                          | 4.61117                                |
| B230120H23Rik | NM_023057    | 1.49E-10                           | 4.51295                          | 4.51295                                |

|               |                    |          |         |         |
|---------------|--------------------|----------|---------|---------|
| Trim29        | NM_023655          | 7.28E-10 | 4.46841 | 4.46841 |
| Pou4f3        | NM_138945          | 2.17E-08 | 4.46799 | 4.46799 |
| Parp10        | NM_001163575       | 6.59E-10 | 4.45592 | 4.45592 |
| Fam163b       | BC147286           | 1.07E-09 | 4.39408 | 4.39408 |
| Fermt1        | NM_198029          | 4.21E-09 | 4.38797 | 4.38797 |
| Pla2g2f       | NM_012045          | 1.21E-09 | 4.38316 | 4.38316 |
| Mst1          | NM_008243          | 5.63E-08 | 4.36607 | 4.36607 |
| Plxdc2        | NM_026162          | 9.95E-09 | 4.35983 | 4.35983 |
| Wnt8b         | NM_011720          | 5.67E-10 | 4.35074 | 4.35074 |
| Fam198b       | NM_133187          | 1.72E-08 | 4.32793 | 4.32793 |
| Itm2a         | NM_008409          | 2.46E-07 | 4.29973 | 4.29973 |
| Tbx4          | NM_011536          | 1.26E-09 | 4.28192 | 4.28192 |
| Plekhh2       | NM_177606          | 1.13E-08 | 4.26852 | 4.26852 |
| Glp1r         | NM_021332          | 1.74E-06 | 4.25598 | 4.25598 |
| Slc6a16       | XM_355900          | 1.32E-10 | 4.24787 | 4.24787 |
| Neurod1       | NM_010894          | 2.20E-09 | 4.20105 | 4.20105 |
| Arhgap40      | NM_001145015       | 3.89E-10 | 4.19806 | 4.19806 |
| Mlana         | NM_029993          | 3.55E-08 | 4.17829 | 4.17829 |
| Faim2         | NM_028224          | 7.31E-10 | 4.15602 | 4.15602 |
| Tmem184a      | NM_001161548       | 9.53E-11 | 4.13418 | 4.13418 |
| 9030617O03Rik | BC066161           | 2.62E-09 | 4.11838 | 4.11838 |
| Wnt3          | NM_009521          | 2.96E-08 | 4.07111 | 4.07111 |
| P2rx7         | NM_011027          | 2.95E-10 | 4.0678  | 4.0678  |
| Fgfr4         | NM_008011          | 3.85E-12 | 4.05143 | 4.05143 |
| Tec           | NM_001113460       | 1.59E-07 | 4.03788 | 4.03788 |
| Sbsn          | NM_172205          | 1.36E-09 | 4.02684 | 4.02684 |
| Slc6a13       | NM_144512          | 3.10E-10 | 4.00548 | 4.00548 |
| Gm10532       | ENSMUST00000097524 | 4.75E-09 | 3.99362 | 3.99362 |
| Podn          | NM_172874          | 6.57E-09 | 3.98993 | 3.98993 |
| Myo18b        | NM_028901          | 1.44E-08 | 3.95794 | 3.95794 |
| Slit1         | NM_015748          | 4.09E-09 | 3.94309 | 3.94309 |
| Pygm          | NM_011224          | 4.59E-09 | 3.93983 | 3.93983 |
| Galnt6        | NM_001161767       | 2.88E-09 | 3.93804 | 3.93804 |
| Synm          | NM_201639          | 1.26E-10 | 3.91492 | 3.91492 |
| Nfam1         | NM_028728          | 1.28E-11 | 3.90418 | 3.90418 |
| Ms4a10        | NM_023529          | 6.42E-07 | 3.90414 | 3.90414 |
| Psd2          | NM_028707          | 7.93E-09 | 3.90383 | 3.90383 |
| Fkbp10        | NM_010221          | 2.63E-10 | 3.8998  | 3.8998  |
| Dmrtb1        | NM_019872          | 7.48E-09 | 3.8801  | 3.8801  |
| Ttc28         | NM_024477          | 2.34E-10 | 3.87571 | 3.87571 |
| Bmp7          | NM_007557          | 3.37E-10 | 3.87177 | 3.87177 |
| Ces5          | NM_172759          | 7.80E-07 | 3.85656 | 3.85656 |
| Hsd17b1       | NM_010475          | 6.77E-10 | 3.81951 | 3.81951 |

|               |                    |          |         |         |
|---------------|--------------------|----------|---------|---------|
| Igdcc4        | NM_020043          | 3.89E-11 | 3.80454 | 3.80454 |
| Ada           | NM_007398          | 8.15E-09 | 3.78915 | 3.78915 |
| Mmrn2         | NM_153127          | 6.54E-07 | 3.77255 | 3.77255 |
| Afap1l2       | NM_146102          | 7.27E-10 | 3.76266 | 3.76266 |
| Bin1          | NM_009668          | 7.57E-11 | 3.75819 | 3.75819 |
| Prox2         | NM_175198          | 3.49E-10 | 3.75214 | 3.75214 |
| Ankrd42       | NM_028665          | 3.93E-11 | 3.74009 | 3.74009 |
| Sirpa         | NM_007547          | 3.46E-09 | 3.73563 | 3.73563 |
| Pnmal2        | NM_001099636       | 3.01E-10 | 3.73115 | 3.73115 |
| H2-Eb1        | NM_010382          | 2.44E-11 | 3.70824 | 3.70824 |
| Anpep         | NM_008486          | 1.34E-07 | 3.69316 | 3.69316 |
| Sec14l3       | NM_001029937       | 1.00E-09 | 3.69152 | 3.69152 |
| LOC624931     | ENSMUST00000099243 | 1.92E-07 | 3.67155 | 3.67155 |
| Cdhr2         | NM_001033364       | 1.74E-08 | 3.65977 | 3.65977 |
| P2ry6         | NM_183168          | 5.59E-09 | 3.61216 | 3.61216 |
| Rgs14         | NM_016758          | 1.01E-09 | 3.60719 | 3.60719 |
| Avil          | NM_009635          | 2.79E-11 | 3.57766 | 3.57766 |
| Iqsec3        | NM_001033354       | 2.83E-09 | 3.54504 | 3.54504 |
| Phlda3        | NM_013750          | 3.87E-11 | 3.51363 | 3.51363 |
| Gpr75         | NM_175490          | 1.04E-08 | 3.51299 | 3.51299 |
| 1300017J02Rik | NM_027918          | 4.80E-11 | 3.51235 | 3.51235 |
| A430110N23Rik | NM_173008          | 3.41E-10 | 3.49024 | 3.49024 |
| Cxcl10        | NM_021274          | 8.47E-07 | 3.4876  | 3.4876  |
| Des           | NM_010043          | 6.17E-09 | 3.45207 | 3.45207 |
| Padi3         | NM_011060          | 5.49E-08 | 3.44497 | 3.44497 |
| Creb3l1       | NM_011957          | 3.74E-09 | 3.42775 | 3.42775 |
| Pisd-ps1      | NR_003517          | 4.16E-08 | 3.42603 | 3.42603 |
| Myo7a         | NM_008663          | 4.75E-10 | 3.39803 | 3.39803 |
| Unc45b        | NM_178680          | 6.95E-09 | 3.3866  | 3.3866  |
| LOC625240     | ENSMUST00000110576 | 4.86E-07 | 3.38041 | 3.38041 |
| Siglec1       | NM_011426          | 6.45E-10 | 3.37971 | 3.37971 |
| Tuft1         | NM_011656          | 6.93E-09 | 3.37545 | 3.37545 |
| Begain        | NM_001163175       | 1.30E-07 | 3.36923 | 3.36923 |
| Tek           | NM_013690          | 1.36E-09 | 3.36158 | 3.36158 |
| Npr1          | NM_008727          | 1.48E-08 | 3.35873 | 3.35873 |
| Plk5          | NM_183152          | 1.35E-09 | 3.35626 | 3.35626 |
| Plekhg1       | NM_001033253       | 5.35E-07 | 3.35057 | 3.35057 |
| Tcn2          | NM_015749          | 1.23E-08 | 3.30214 | 3.30214 |
| Akap2         | ENSMUST00000107600 | 9.38E-09 | 3.26443 | 3.26443 |
| Cpb1          | NM_029706          | 1.36E-09 | 3.25872 | 3.25872 |
| Il20rb        | NM_001033543       | 6.44E-10 | 3.23739 | 3.23739 |
| 2210023G05Rik | NM_197999          | 6.84E-08 | 3.22648 | 3.22648 |
| Rhpn2         | NM_027897          | 1.25E-09 | 3.20518 | 3.20518 |

|               |                    |          |         |         |
|---------------|--------------------|----------|---------|---------|
| Fbln2         | NM_007992          | 1.07E-08 | 3.19452 | 3.19452 |
| Angptl2       | NM_011923          | 1.79E-08 | 3.1898  | 3.1898  |
| Efnb2         | NM_010111          | 1.75E-07 | 3.16341 | 3.16341 |
| Gm3994        | ENSMUST00000098805 | 3.77E-07 | 3.15176 | 3.15176 |
| Evpl          | NM_025276          | 1.80E-09 | 3.13973 | 3.13973 |
| Pitpnm2       | NM_011256          | 4.29E-10 | 3.12846 | 3.12846 |
| Aldh1l1       | NM_027406          | 9.13E-11 | 3.12756 | 3.12756 |
| Coro6         | NM_139128          | 1.06E-07 | 3.12073 | 3.12073 |
| Tmem150a      | NM_144916          | 1.19E-07 | 3.11728 | 3.11728 |
| Neb           | NM_010889          | 5.85E-11 | 3.11584 | 3.11584 |
| Mesp2         | NM_008589          | 2.32E-07 | 3.09362 | 3.09362 |
| Gm7241        | XM_987328          | 2.34E-08 | 3.08514 | 3.08514 |
| Hmcn2         | ENSMUST00000074390 | 7.60E-11 | 3.08078 | 3.08078 |
| Slco2b1       | NM_175316          | 3.89E-09 | 3.0683  | 3.0683  |
| Sez6          | NM_021286          | 3.13E-08 | 3.064   | 3.064   |
| Vdr           | NM_009504          | 3.27E-09 | 3.05863 | 3.05863 |
| Hr            | NM_021877          | 2.22E-10 | 3.0536  | 3.0536  |
| Rap1gap2      | NM_001015046       | 1.52E-09 | 3.04226 | 3.04226 |
| 1810041L15Rik | NM_001163145       | 3.18E-07 | 3.03702 | 3.03702 |
| Gm10679       | ENSMUST00000098806 | 4.12E-07 | 3.02933 | 3.02933 |
| Celsr1        | NM_009886          | 2.16E-10 | 3.02171 | 3.02171 |
| Rpl31         | BC092139           | 3.17E-07 | 3.01986 | 3.01986 |
| BC021614      | BC034269           | 1.09E-08 | 3.01773 | 3.01773 |
| Padi2         | NM_008812          | 5.25E-11 | 3.00616 | 3.00616 |
| Gaa           | NM_008064          | 6.97E-09 | 2.99758 | 2.99758 |
| Slc7a4        | NM_144852          | 3.01E-08 | 2.99621 | 2.99621 |
| Sfi1          | NM_030207          | 2.72E-09 | 2.99326 | 2.99326 |
| 5330417C22Rik | NM_001033304       | 1.01E-09 | 2.98213 | 2.98213 |
| Vwce          | NM_027913          | 7.10E-08 | 2.98061 | 2.98061 |
| Atp2b4        | NM_001167949       | 6.16E-09 | 2.95808 | 2.95808 |
| Tmem48        | NM_028355          | 6.87E-10 | 2.94605 | 2.94605 |
| Slc5a4a       | NM_133184          | 2.06E-08 | 2.93585 | 2.93585 |
| C4b           | NM_009780          | 2.09E-07 | 2.93245 | 2.93245 |
| Ptk2b         | NM_001162365       | 2.03E-09 | 2.91148 | 2.91148 |
| Ccdc125       | NM_183115          | 7.90E-08 | 2.90838 | 2.90838 |
| Rhbg          | NM_021375          | 2.96E-08 | 2.87706 | 2.87706 |
| Pvrl4         | NM_027893          | 4.90E-10 | 2.87634 | 2.87634 |
| Got1l1        | NM_029674          | 1.48E-08 | 2.85633 | 2.85633 |
| Tmc8          | NM_181856          | 1.60E-08 | 2.85509 | 2.85509 |
| D630023F18Rik | BC137870           | 2.58E-08 | 2.85151 | 2.85151 |
| Plekhb2       | NM_145516          | 5.26E-10 | 2.85106 | 2.85106 |
| Lgals3bp      | NM_011150          | 5.19E-07 | 2.84472 | 2.84472 |
| Gm5077        | NM_173864          | 2.62E-08 | 2.84379 | 2.84379 |

|               |                    |          |         |         |
|---------------|--------------------|----------|---------|---------|
| Tmem130       | NM_177735          | 4.34E-09 | 2.84368 | 2.84368 |
| Krt15         | NM_008469          | 5.18E-09 | 2.82949 | 2.82949 |
| Mir200b       | NR_029587          | 1.20E-07 | 2.82819 | 2.82819 |
| Prkd2         | NM_178900          | 4.96E-07 | 2.82518 | 2.82518 |
| Rsph6a        | NM_031255          | 4.23E-07 | 2.82092 | 2.82092 |
| Cyp2c44       | NM_001001446       | 4.07E-09 | 2.81808 | 2.81808 |
| Dpep3         | NM_027960          | 4.61E-09 | 2.81735 | 2.81735 |
| Sgcb          | NM_011890          | 1.16E-07 | 2.80521 | 2.80521 |
| Micall2       | NM_174850          | 8.65E-09 | 2.8001  | 2.8001  |
| 1200009I06Rik | NM_028807          | 6.14E-08 | 2.79534 | 2.79534 |
| Art4          | NM_026639          | 5.06E-08 | 2.79471 | 2.79471 |
| Sfrs13b       | NM_177774          | 3.40E-09 | 2.78512 | 2.78512 |
| Myo15b        | ENSMUST00000093911 | 3.14E-09 | 2.78394 | 2.78394 |
| Pdzd7         | BC147399           | 1.87E-07 | 2.78002 | 2.78002 |
| 4930550C14Rik | BC115639           | 2.59E-07 | 2.7724  | 2.7724  |
| Adamts2       | NM_175643          | 4.30E-09 | 2.76921 | 2.76921 |
| Slc5a11       | NM_146198          | 1.04E-10 | 2.76517 | 2.76517 |
| Mvp           | NM_080638          | 1.59E-07 | 2.76289 | 2.76289 |
| Nrarp         | NM_025980          | 7.66E-06 | 2.76143 | 2.76143 |
| Sec16b        | NM_033354          | 6.63E-08 | 2.75945 | 2.75945 |
| Ccdc135       | NM_001042715       | 4.77E-08 | 2.75681 | 2.75681 |
| Fermt3        | NM_153795          | 1.04E-08 | 2.75323 | 2.75323 |
| Slc5a1        | NM_019810          | 5.52E-08 | 2.74853 | 2.74853 |
| Arhgap28      | NM_172964          | 1.44E-07 | 2.74837 | 2.74837 |
| Angpt2        | NM_007426          | 3.93E-08 | 2.74602 | 2.74602 |
| Ltbp2         | NM_013589          | 1.29E-06 | 2.7363  | 2.7363  |
| 9330129D05Rik | NM_178799          | 1.67E-05 | 2.73444 | 2.73444 |
| Usp44         | NM_183199          | 8.90E-10 | 2.72973 | 2.72973 |
| C4a           | NM_011413          | 2.63E-07 | 2.72301 | 2.72301 |
| Ldb3          | NM_001039074       | 4.61E-10 | 2.7158  | 2.7158  |
| Zfp397os      | NM_001080810       | 2.39E-07 | 2.71532 | 2.71532 |
| Slc36a2       | NM_153170          | 3.48E-07 | 2.70556 | 2.70556 |
| Adcy7         | NM_007406          | 1.33E-08 | 2.70518 | 2.70518 |
| Sdc4          | NM_011521          | 5.39E-08 | 2.70384 | 2.70384 |
| Sord          | NM_146126          | 2.99E-10 | 2.69669 | 2.69669 |
| Asprv1        | NM_026414          | 4.08E-09 | 2.69598 | 2.69598 |
| Mcam          | NM_023061          | 1.06E-08 | 2.68751 | 2.68751 |
| Pcgf3         | NM_172716          | 1.41E-08 | 2.67982 | 2.67982 |
| 1700024J04Rik | AK006305           | 2.29E-07 | 2.67966 | 2.67966 |
| Apba1         | NM_177034          | 1.40E-08 | 2.67692 | 2.67692 |
| Pdzrn3        | NM_018884          | 9.82E-07 | 2.67563 | 2.67563 |
| Atg9b         | NM_001002897       | 8.71E-10 | 2.67482 | 2.67482 |
| Rnf144b       | NM_146042          | 9.39E-07 | 2.67139 | 2.67139 |

|               |                    |             |         |         |
|---------------|--------------------|-------------|---------|---------|
| Cbln2         | NM_172633          | 3.66E-09    | 2.67063 | 2.67063 |
| Msln1         | NM_177822          | 6.13E-08    | 2.66528 | 2.66528 |
| Pixna1        | NM_008881          | 1.30E-10    | 2.66328 | 2.66328 |
| Apba2         | NM_007461          | 1.59E-09    | 2.65931 | 2.65931 |
| Arntl2        | NM_172309          | 5.20E-08    | 2.65379 | 2.65379 |
| Alad          | NM_008525          | 1.33E-08    | 2.64083 | 2.64083 |
| Nr3c1         | NM_008173          | 1.31E-08    | 2.63412 | 2.63412 |
| Slco4a1       | NM_148933          | 4.89E-11    | 2.62569 | 2.62569 |
| Pfkfb4        | NM_173019          | 1.79E-09    | 2.61261 | 2.61261 |
| Snx20         | NM_027840          | 1.47E-07    | 2.61166 | 2.61166 |
| Kif18b        | NM_197959          | 1.68E-09    | 2.60794 | 2.60794 |
| Rhbd11        | NM_144816          | 3.90E-09    | 2.60192 | 2.60192 |
| Jph2          | NM_021566          | 2.85E-10    | 2.60148 | 2.60148 |
| Slmap         | NM_032008          | 1.96E-07    | 2.58522 | 2.58522 |
| Ankrd56       | NM_175270          | 0.000601088 | 2.58362 | 2.58362 |
| Tkt11         | NM_031379          | 2.47E-07    | 2.58353 | 2.58353 |
| Dok1          | NM_010070          | 1.61E-05    | 2.55544 | 2.55544 |
| Nfatc2        | NM_010899          | 1.15E-09    | 2.55371 | 2.55371 |
| E230016K23Rik | ENSMUST00000063354 | 5.95E-07    | 2.55082 | 2.55082 |
| Nudt18        | NM_153136          | 1.70E-05    | 2.54317 | 2.54317 |
| Mir200a       | NR_029723          | 1.19E-07    | 2.54246 | 2.54246 |
| Irgm2         | NM_019440          | 1.46E-06    | 2.54054 | 2.54054 |
| Gm221         | ENSMUST00000019901 | 5.68E-07    | 2.5377  | 2.5377  |
| Agbl5         | NM_001048192       | 1.62E-10    | 2.53506 | 2.53506 |
| Hsdl2         | NM_024255          | 9.27E-08    | 2.52843 | 2.52843 |
| Tarsl2        | NM_172310          | 2.02E-08    | 2.51937 | 2.51937 |
| Dlg5          | NM_001163513       | 1.67E-09    | 2.51883 | 2.51883 |
| D19Ertd652e   | BC107403           | 7.95E-07    | 2.51868 | 2.51868 |
| Cdkn2b        | NM_007670          | 2.19E-10    | 2.5172  | 2.5172  |
| Cbfa2t3       | NM_009824          | 2.27E-08    | 2.50877 | 2.50877 |
| Chd5          | NM_001081376       | 2.11E-09    | 2.50327 | 2.50327 |
| Ssh2          | ENSMUST00000037912 | 2.05E-05    | 2.50195 | 2.50195 |
| Cald1         | NM_145575          | 1.28E-07    | 2.49224 | 2.49224 |
| Wbp2nl        | NM_029066          | 6.84E-10    | 2.48969 | 2.48969 |
| Fam35a        | NM_029389          | 2.75E-07    | 2.48968 | 2.48968 |
| Hey2          | NM_013904          | 1.76E-09    | 2.48707 | 2.48707 |
| St3gal5       | NM_011375          | 2.49E-08    | 2.48637 | 2.48637 |
| Pak3          | NM_008778          | 6.42E-11    | 2.48613 | 2.48613 |
| Txlnb         | NM_138628          | 1.98E-10    | 2.48324 | 2.48324 |
| Cd300lf       | NM_001169153       | 4.03E-06    | 2.4819  | 2.4819  |
| Fez1          | NM_183171          | 1.51E-06    | 2.48108 | 2.48108 |
| Slc25a17      | NM_011399          | 2.24E-06    | 2.47554 | 2.47554 |
| Zkscan16      | NM_001099323       | 1.71E-07    | 2.46905 | 2.46905 |



|               |              |          |         |         |
|---------------|--------------|----------|---------|---------|
| Papln         | NM_130887    | 1.14E-07 | 2.46898 | 2.46898 |
| Fat2          | NM_001029988 | 1.04E-08 | 2.46644 | 2.46644 |
| Repin1        | NM_001079901 | 1.34E-08 | 2.46099 | 2.46099 |
| Dgkz          | NM_001166597 | 7.75E-09 | 2.46028 | 2.46028 |
| Slc1a1        | NM_009199    | 2.51E-09 | 2.45645 | 2.45645 |
| Masp2         | NM_001003893 | 1.99E-11 | 2.4503  | 2.4503  |
| Upk1b         | NM_178924    | 5.99E-06 | 2.44882 | 2.44882 |
| Nubp1         | NM_011955    | 5.55E-07 | 2.44712 | 2.44712 |
| Car12         | NM_178396    | 8.39E-07 | 2.44507 | 2.44507 |
| Hormad1       | NM_026489    | 1.16E-05 | 2.44365 | 2.44365 |
| Acaa1b        | NM_146230    | 5.08E-06 | 2.43793 | 2.43793 |
| Slc5a3        | NM_017391    | 5.58E-07 | 2.43713 | 2.43713 |
| Stat1         | NM_009283    | 1.84E-07 | 2.42829 | 2.42829 |
| Ccdc88b       | NM_001081291 | 1.73E-07 | 2.42674 | 2.42674 |
| Nhej1         | NM_029342    | 1.36E-06 | 2.41472 | 2.41472 |
| Atp9a         | NM_015731    | 5.09E-09 | 2.41398 | 2.41398 |
| Fer1l4        | NM_001136556 | 3.91E-08 | 2.41311 | 2.41311 |
| Ell3          | NM_145973    | 4.25E-10 | 2.4121  | 2.4121  |
| Trio          | NM_001081302 | 7.54E-08 | 2.40683 | 2.40683 |
| Ndst1         | NM_008306    | 7.60E-11 | 2.4067  | 2.4067  |
| Efemp1        | NM_146015    | 2.44E-05 | 2.40235 | 2.40235 |
| 9830001H06Rik | NM_001164663 | 6.94E-08 | 2.3958  | 2.3958  |
| Cdcp1         | NM_133974    | 3.24E-06 | 2.39359 | 2.39359 |
| E130112L23Rik | NM_198249    | 3.78E-07 | 2.39178 | 2.39178 |
| Fam125b       | NM_175184    | 1.60E-05 | 2.39174 | 2.39174 |
| Tert          | NM_009354    | 1.49E-08 | 2.38361 | 2.38361 |
| Tmprss13      | NM_001013373 | 1.70E-06 | 2.37452 | 2.37452 |
| Pld1          | NM_001164056 | 1.76E-08 | 2.37126 | 2.37126 |
| Aim1          | NM_172393    | 5.72E-08 | 2.36281 | 2.36281 |
| Stox2         | NM_001114311 | 1.13E-05 | 2.36127 | 2.36127 |
| Gdpd5         | NM_201352    | 1.63E-08 | 2.35921 | 2.35921 |
| Zfp362        | NM_001081098 | 1.32E-09 | 2.35828 | 2.35828 |
| Rbck1         | NM_019705    | 1.61E-05 | 2.3534  | 2.3534  |
| Nrp1          | NM_008737    | 2.76E-07 | 2.35259 | 2.35259 |
| Smox          | NM_001177833 | 1.75E-08 | 2.35084 | 2.35084 |
| Cacng1        | NM_007582    | 3.81E-08 | 2.34828 | 2.34828 |
| Prr15l        | NM_146026    | 1.05E-06 | 2.34637 | 2.34637 |
| C1s           | NM_144938    | 1.69E-06 | 2.34397 | 2.34397 |
| Arap1         | NM_001040111 | 1.16E-09 | 2.34151 | 2.34151 |
| Tmprss6       | NM_027902    | 3.56E-08 | 2.34037 | 2.34037 |
| Nudt14        | NM_025399    | 2.77E-07 | 2.33414 | 2.33414 |
| Zbp1          | NM_021394    | 1.83E-10 | 2.32881 | 2.32881 |
| Sepn1         | NM_029100    | 7.86E-11 | 2.32492 | 2.32492 |

|               |              |             |         |         |
|---------------|--------------|-------------|---------|---------|
| Pcyox1l       | NM_172832    | 2.22E-09    | 2.32336 | 2.32336 |
| Ttpal         | NM_029512    | 0.000137076 | 2.31743 | 2.31743 |
| Dll1          | NM_007865    | 2.43E-08    | 2.31627 | 2.31627 |
| Cyld          | NM_001128169 | 0.000131801 | 2.31598 | 2.31598 |
| Chrna4        | NM_015730    | 3.28E-07    | 2.31505 | 2.31505 |
| Arl8a         | NM_026823    | 3.62E-06    | 2.30833 | 2.30833 |
| Noxo1         | NM_027988    | 8.19E-08    | 2.30723 | 2.30723 |
| Oprk1         | NM_011011    | 1.92E-05    | 2.30053 | 2.30053 |
| F5            | NM_007976    | 2.69E-08    | 2.29601 | 2.29601 |
| Ankrd34b      | NM_175455    | 4.05E-07    | 2.29479 | 2.29479 |
| Mpp4          | NM_001164682 | 2.30E-07    | 2.29471 | 2.29471 |
| Rspo4         | NM_001040689 | 5.78E-05    | 2.29393 | 2.29393 |
| Rasa3         | NM_009025    | 5.58E-05    | 2.2939  | 2.2939  |
| C1rb          | NM_001113356 | 2.90E-08    | 2.29038 | 2.29038 |
| Tas1r1        | NM_031867    | 2.02E-08    | 2.2879  | 2.2879  |
| Rab11fip1     | NM_001080813 | 3.87E-08    | 2.28789 | 2.28789 |
| Axl           | NM_009465    | 9.30E-10    | 2.28371 | 2.28371 |
| Id2           | NM_010496    | 1.43E-08    | 2.2777  | 2.2777  |
| Gm11545       | NM_001105561 | 5.66E-05    | 2.26913 | 2.26913 |
| Ptk7          | NM_175168    | 3.91E-08    | 2.26899 | 2.26899 |
| 2610034B18Rik | BC031379     | 2.79E-06    | 2.26359 | 2.26359 |
| Mcm3ap        | NM_019434    | 2.90E-06    | 2.26003 | 2.26003 |
| 6430531B16Rik | BC145730     | 0.000135942 | 2.25769 | 2.25769 |
| Prss34        | NM_178372    | 7.26E-07    | 2.25444 | 2.25444 |
| Sap30bp       | NM_020483    | 5.60E-05    | 2.25361 | 2.25361 |
| Mlxipl        | NM_021455    | 1.72E-08    | 2.25183 | 2.25183 |
| Foxn1         | NM_008238    | 2.29E-09    | 2.24913 | 2.24913 |
| Palm2         | NM_172868    | 2.53E-08    | 2.24372 | 2.24372 |
| Gas2l2        | NM_001013759 | 7.62E-07    | 2.23956 | 2.23956 |
| Camsap1       | NM_001115076 | 6.60E-08    | 2.23818 | 2.23818 |
| Sgca          | NM_009161    | 5.57E-08    | 2.23238 | 2.23238 |
| Myl2          | NM_010861    | 5.04E-11    | 2.23203 | 2.23203 |
| Vwa2          | NM_172840    | 7.83E-08    | 2.22676 | 2.22676 |
| Pkd1l2        | NM_029686    | 9.04E-08    | 2.22186 | 2.22186 |
| Nomo1         | NM_153057    | 1.18E-10    | 2.22121 | 2.22121 |
| Qrich2        | NM_001033267 | 1.19E-07    | 2.22014 | 2.22014 |
| Smtnl1        | NM_024230    | 3.46E-08    | 2.2166  | 2.2166  |
| Gm10035       | NM_001081471 | 3.74E-07    | 2.21523 | 2.21523 |
| Al314831      | NR_015462    | 7.84E-08    | 2.21126 | 2.21126 |
| Rassf10       | NM_175279    | 4.30E-07    | 2.21038 | 2.21038 |
| Astl          | NM_172539    | 5.75E-07    | 2.20285 | 2.20285 |
| Lmo1          | NM_057173    | 1.09E-06    | 2.20229 | 2.20229 |
| Ece1          | NM_199307    | 2.93E-07    | 2.20193 | 2.20193 |

|               |                    |          |         |         |
|---------------|--------------------|----------|---------|---------|
| 2410076I21Rik | NM_028598          | 2.04E-07 | 2.20124 | 2.20124 |
| 2310067B10Rik | NM_028014          | 2.44E-07 | 2.19931 | 2.19931 |
| Zap70         | NM_009539          | 1.76E-09 | 2.19409 | 2.19409 |
| Pdrg1         | NM_178939          | 1.77E-06 | 2.18971 | 2.18971 |
| Wnt4          | NM_009523          | 4.66E-09 | 2.18611 | 2.18611 |
| Traf3ip2      | NM_134000          | 7.44E-09 | 2.1839  | 2.1839  |
| Gpr132        | NM_019925          | 3.12E-07 | 2.18221 | 2.18221 |
| Htr4          | NM_008313          | 5.05E-06 | 2.17835 | 2.17835 |
| Art3          | NM_181728          | 1.17E-06 | 2.17562 | 2.17562 |
| Ust           | NM_177387          | 3.22E-06 | 2.17393 | 2.17393 |
| Ppp2r2b       | NM_028392          | 5.41E-08 | 2.17328 | 2.17328 |
| Kcnp3         | NM_019789          | 1.46E-06 | 2.17236 | 2.17236 |
| Fbxw4         | NM_013907          | 4.41E-07 | 2.16943 | 2.16943 |
| Rgl1          | NM_016846          | 9.33E-07 | 2.16687 | 2.16687 |
| Gm12569       | ENSMUST00000074198 | 7.20E-06 | 2.16551 | 2.16551 |
| Zfp688        | NM_026999          | 2.37E-08 | 2.15616 | 2.15616 |
| Zbtb7c        | NM_145356          | 3.68E-07 | 2.15603 | 2.15603 |
| Prkag1        | NM_016781          | 3.48E-06 | 2.15174 | 2.15174 |
| Rab31         | NM_133685          | 2.96E-09 | 2.15121 | 2.15121 |
| Dusp13        | NM_001007268       | 1.03E-07 | 2.14912 | 2.14912 |
| 6330503K22Rik | NM_182995          | 3.51E-06 | 2.14772 | 2.14772 |
| 2310038E17Rik | BC117742           | 4.10E-07 | 2.14208 | 2.14208 |
| Sh2b1         | NM_011363          | 7.95E-10 | 2.13975 | 2.13975 |
| Pou4f1        | NM_011143          | 2.11E-05 | 2.13441 | 2.13441 |
| Psmb9         | NM_013585          | 2.71E-06 | 2.13128 | 2.13128 |
| Itgae         | NM_008399          | 2.08E-08 | 2.12451 | 2.12451 |
| Susd4         | NM_144796          | 7.87E-08 | 2.12414 | 2.12414 |
| Plp           | NM_026385          | 1.62E-06 | 2.12373 | 2.12373 |
| BC034090      | AK129406           | 1.05E-07 | 2.12357 | 2.12357 |
| Mosc1         | NM_001081361       | 3.22E-06 | 2.12271 | 2.12271 |
| 2310057J16Rik | NM_001163749       | 2.39E-07 | 2.12038 | 2.12038 |
| Cpne7         | NM_170684          | 1.60E-08 | 2.1196  | 2.1196  |
| Lrrc32        | NM_001113379       | 4.81E-06 | 2.11097 | 2.11097 |
| Hoxc13        | NM_010464          | 2.30E-05 | 2.11073 | 2.11073 |
| Slc34a3       | NM_080854          | 4.38E-07 | 2.10819 | 2.10819 |
| Clec4g        | NM_029465          | 2.84E-07 | 2.10758 | 2.10758 |
| Xirp1         | NM_011724          | 8.96E-07 | 2.10669 | 2.10669 |
| Slc39a13      | NM_026721          | 1.27E-07 | 2.10214 | 2.10214 |
| Dsc3          | NM_007882          | 4.45E-06 | 2.09944 | 2.09944 |
| Fam83f        | NM_145986          | 1.28E-06 | 2.09888 | 2.09888 |
| BC026585      | NM_001033284       | 4.54E-07 | 2.09698 | 2.09698 |
| Ppl           | NM_008909          | 1.48E-09 | 2.09476 | 2.09476 |
| Ldoc1l        | NM_177630          | 6.95E-05 | 2.09226 | 2.09226 |

|               |              |          |         |         |
|---------------|--------------|----------|---------|---------|
| Frmpd1        | NM_001081172 | 5.82E-08 | 2.08956 | 2.08956 |
| Fam47e        | NM_001033478 | 2.47E-06 | 2.08627 | 2.08627 |
| Gatm          | NM_025961    | 3.57E-06 | 2.08569 | 2.08569 |
| Trim56        | NM_201373    | 2.66E-08 | 2.08507 | 2.08507 |
| Rnf144a       | NM_001081977 | 4.66E-08 | 2.08466 | 2.08466 |
| Rec8          | NM_020002    | 6.00E-09 | 2.08424 | 2.08424 |
| Micall1       | NM_177461    | 4.91E-07 | 2.08178 | 2.08178 |
| Garnl3        | NM_178888    | 7.22E-08 | 2.08035 | 2.08035 |
| Asb10         | NM_080444    | 2.83E-06 | 2.07791 | 2.07791 |
| Pgbd5         | NM_171824    | 1.25E-05 | 2.0767  | 2.0767  |
| Trim62        | NM_178110    | 2.54E-07 | 2.0744  | 2.0744  |
| Mdga1         | NM_001081160 | 2.47E-08 | 2.07285 | 2.07285 |
| Figf          | NM_010216    | 1.20E-05 | 2.07275 | 2.07275 |
| Amotl1        | NM_001081395 | 1.68E-08 | 2.07187 | 2.07187 |
| Dnahc17       | NM_001167746 | 9.04E-06 | 2.06938 | 2.06938 |
| Rapgef1       | NM_001080925 | 4.43E-07 | 2.0657  | 2.0657  |
| Fam115a       | BC031718     | 3.13E-07 | 2.063   | 2.063   |
| Grlf1         | NM_172739    | 5.36E-07 | 2.06164 | 2.06164 |
| Vwa3b         | XR_032810    | 5.03E-07 | 2.05983 | 2.05983 |
| Vgf           | NM_001039385 | 6.81E-08 | 2.05085 | 2.05085 |
| Wdr52         | NM_001033247 | 5.69E-08 | 2.05075 | 2.05075 |
| Cacna2d2      | NM_001174047 | 7.77E-07 | 2.04995 | 2.04995 |
| Scube1        | NM_022723    | 8.22E-07 | 2.04976 | 2.04976 |
| Krt13         | NM_010662    | 3.86E-07 | 2.04959 | 2.04959 |
| Fam195b       | NM_001033231 | 9.55E-07 | 2.04915 | 2.04915 |
| Ngef          | NM_001111314 | 3.35E-08 | 2.04895 | 2.04895 |
| Taok3         | NM_001081308 | 1.59E-06 | 2.03901 | 2.03901 |
| Timm8a2       | NM_001037744 | 1.76E-05 | 2.03882 | 2.03882 |
| Dnahc2        | NM_001081330 | 9.64E-09 | 2.03743 | 2.03743 |
| Tmed4         | NM_134020    | 3.41E-05 | 2.03673 | 2.03673 |
| Zfp28         | NM_175247    | 1.72E-05 | 2.03658 | 2.03658 |
| Asphd2        | NM_028386    | 4.22E-07 | 2.03586 | 2.03586 |
| Abhd2         | NM_018811    | 1.97E-07 | 2.03525 | 2.03525 |
| Ppp1r16b      | NM_153089    | 1.74E-07 | 2.03348 | 2.03348 |
| Foxj2         | NM_021899    | 3.28E-07 | 2.03333 | 2.03333 |
| Fech          | NM_007998    | 1.04E-05 | 2.03129 | 2.03129 |
| 4632415K11Rik | BC030874     | 4.68E-08 | 2.02851 | 2.02851 |
| Pla2g4b       | NM_145378    | 7.51E-09 | 2.02678 | 2.02678 |
| Lcat          | NM_008490    | 6.72E-06 | 2.02532 | 2.02532 |
| 4930590J08Rik | NM_198668    | 4.63E-09 | 2.0218  | 2.0218  |
| Hyal3         | NM_178020    | 1.39E-05 | 2.02164 | 2.02164 |
| Kif21b        | NM_001039472 | 1.65E-09 | 2.02113 | 2.02113 |
| 4933429F08Rik | NM_177828    | 1.11E-06 | 2.0186  | 2.0186  |

|               |                    |             |         |         |
|---------------|--------------------|-------------|---------|---------|
| Glb1l2        | NM_153803          | 1.20E-06    | 2.01832 | 2.01832 |
| Rab17         | NM_008998          | 1.05E-06    | 2.01687 | 2.01687 |
| Sfrp2         | NM_009144          | 3.31E-07    | 2.01099 | 2.01099 |
| Ap1m2         | NM_001110300       | 1.59E-08    | 2.00787 | 2.00787 |
| Ttc22         | NM_177667          | 5.30E-06    | 2.00754 | 2.00754 |
| Serpine1      | NM_008871          | 2.06E-08    | 2.00707 | 2.00707 |
| Cog7          | NM_001033318       | 1.85E-09    | 2.0067  | 2.0067  |
| Dnahc10       | NM_019536          | 8.56E-08    | 1.99919 | 1.99919 |
| Arhgap23      | NM_021493          | 5.46E-07    | 1.99875 | 1.99875 |
| Ush1c         | NM_153677          | 1.09E-07    | 1.99677 | 1.99677 |
| Mybpc2        | NM_146189          | 7.87E-07    | 1.99503 | 1.99503 |
| Fam83g        | NM_178618          | 1.69E-05    | 1.99461 | 1.99461 |
| Fa2h          | NM_178086          | 8.05E-05    | 1.99458 | 1.99458 |
| Jun           | NM_010591          | 2.09E-06    | 1.99273 | 1.99273 |
| Usp2          | NM_198092          | 4.96E-07    | 1.98842 | 1.98842 |
| Hspa12a       | NM_175199          | 8.79E-08    | 1.98781 | 1.98781 |
| Emp3          | NM_010129          | 2.49E-06    | 1.98415 | 1.98415 |
| Rasl11a       | NM_026864          | 1.20E-08    | 1.98412 | 1.98412 |
| Arhgap10      | ENSMUST00000076316 | 1.42E-06    | 1.98199 | 1.98199 |
| Oma1          | NM_025909          | 1.53E-05    | 1.98156 | 1.98156 |
| Megf6         | NM_001162977       | 2.14E-05    | 1.97711 | 1.97711 |
| Asb7          | NR_003961          | 0.000254601 | 1.97653 | 1.97653 |
| Klhl30        | NM_027551          | 2.07E-06    | 1.97328 | 1.97328 |
| Gm4469        | XM_001480057       | 7.48E-06    | 1.97211 | 1.97211 |
| Slc12a8       | NM_134251          | 1.02E-06    | 1.97091 | 1.97091 |
| Plbd1         | NM_025806          | 3.23E-06    | 1.96921 | 1.96921 |
| Unc5a         | NM_153131          | 1.56E-06    | 1.96846 | 1.96846 |
| Gm7059        | XR_031115          | 0.00026039  | 1.96805 | 1.96805 |
| Fgd5          | NM_172731          | 1.67E-09    | 1.96756 | 1.96756 |
| Dpy19l3       | NM_178704          | 5.42E-07    | 1.96676 | 1.96676 |
| Kcnab2        | NM_010598          | 5.06E-07    | 1.96667 | 1.96667 |
| Gulo          | NM_178747          | 8.31E-06    | 1.96597 | 1.96597 |
| Cyr61         | NM_010516          | 9.18E-09    | 1.96504 | 1.96504 |
| Zhx3          | NM_177263          | 7.50E-08    | 1.96367 | 1.96367 |
| Rbp2          | NM_009034          | 3.28E-05    | 1.96262 | 1.96262 |
| Cnga3         | NM_009918          | 1.11E-08    | 1.96051 | 1.96051 |
| Dscam1        | NM_001081270       | 1.24E-05    | 1.95957 | 1.95957 |
| 3110062M04Rik | NM_199145          | 1.20E-08    | 1.95411 | 1.95411 |
| Tgfbr3        | NM_011578          | 8.74E-07    | 1.95391 | 1.95391 |
| Fbf1          | NM_172571          | 3.57E-07    | 1.95322 | 1.95322 |
| Myot          | NM_001033621       | 1.24E-06    | 1.95308 | 1.95308 |
| Tnfaip6       | NM_009398          | 6.74E-06    | 1.95228 | 1.95228 |
| Hmga2         | NM_010441          | 1.81E-05    | 1.9521  | 1.9521  |

|               |                    |             |         |         |
|---------------|--------------------|-------------|---------|---------|
| Wdr86         | NM_001081441       | 6.91E-05    | 1.94923 | 1.94923 |
| Obscn         | NM_199152          | 1.33E-08    | 1.94792 | 1.94792 |
| Dnm1          | NM_010065          | 2.21E-08    | 1.94498 | 1.94498 |
| Acer1         | NM_175731          | 9.43E-07    | 1.94458 | 1.94458 |
| Golga7b       | NM_001141983       | 9.59E-06    | 1.94372 | 1.94372 |
| Gm10863       | ENSMUST00000100455 | 1.55E-05    | 1.94254 | 1.94254 |
| Ly6a          | NM_010738          | 0.000911172 | 1.94214 | 1.94214 |
| Soat2         | NM_146064          | 1.22E-05    | 1.93888 | 1.93888 |
| Csnk1g1       | NM_173185          | 2.16E-08    | 1.93789 | 1.93789 |
| Fam38a        | NM_001037298       | 1.86E-07    | 1.93667 | 1.93667 |
| Cd44          | NM_009851          | 5.60E-08    | 1.93493 | 1.93493 |
| Robo3         | NM_001164767       | 2.19E-06    | 1.93299 | 1.93299 |
| Ednra         | NM_010332          | 4.28E-05    | 1.93203 | 1.93203 |
| Arhgef17      | NM_001081116       | 3.91E-08    | 1.93011 | 1.93011 |
| Itga2         | NM_008396          | 8.52E-08    | 1.92607 | 1.92607 |
| Sec24b        | NM_207209          | 9.11E-07    | 1.9253  | 1.9253  |
| Gm4840        | XM_911153          | 6.08E-08    | 1.92338 | 1.92338 |
| Nkx6-2        | NR_027857          | 3.75E-05    | 1.92326 | 1.92326 |
| Cnst          | NM_146105          | 6.29E-08    | 1.92268 | 1.92268 |
| Rnf123        | NM_032543          | 3.63E-05    | 1.92042 | 1.92042 |
| Cxcl16        | NM_023158          | 1.72E-09    | 1.91985 | 1.91985 |
| Ctxn1         | NM_183315          | 7.40E-10    | 1.9192  | 1.9192  |
| Lace1         | NM_145743          | 9.45E-05    | 1.91791 | 1.91791 |
| 4930451C15Rik | NM_029053          | 4.97E-09    | 1.91778 | 1.91778 |
| Klhl29        | NM_001164493       | 6.22E-08    | 1.9176  | 1.9176  |
| Il15          | NM_008357          | 1.85E-07    | 1.91741 | 1.91741 |
| Adcy6         | NM_007405          | 1.34E-07    | 1.91588 | 1.91588 |
| Apc2          | NM_011789          | 1.88E-07    | 1.91487 | 1.91487 |
| Pnkd          | NM_001039509       | 1.11E-06    | 1.91431 | 1.91431 |
| Spsb1         | NM_029035          | 1.30E-06    | 1.91339 | 1.91339 |
| Limch1        | NM_001001980       | 9.40E-07    | 1.91075 | 1.91075 |
| Kcp           | NM_001029985       | 2.02E-06    | 1.90993 | 1.90993 |
| Bbs7          | NM_027810          | 5.24E-06    | 1.90983 | 1.90983 |
| Slc24a1       | NM_144813          | 5.19E-07    | 1.90916 | 1.90916 |
| Vgll4         | NM_177683          | 2.84E-05    | 1.90814 | 1.90814 |
| Pdcd6ip       | NM_001164677       | 3.99E-08    | 1.90715 | 1.90715 |
| Dab2ip        | NM_001114124       | 8.41E-06    | 1.90216 | 1.90216 |
| Phyhip        | NM_145981          | 4.96E-06    | 1.9013  | 1.9013  |
| Itpr1p        | NM_001001738       | 4.09E-06    | 1.9     | 1.9     |
| Tns1          | NM_027884          | 2.45E-07    | 1.89766 | 1.89766 |
| Hpca          | NM_010471          | 4.65E-08    | 1.89566 | 1.89566 |
| Apeh          | NM_146226          | 3.55E-08    | 1.89546 | 1.89546 |
| Tubgcp3       | NM_198031          | 8.49E-06    | 1.89515 | 1.89515 |

|               |              |             |         |         |
|---------------|--------------|-------------|---------|---------|
| Pfkm          | NM_001163487 | 4.32E-08    | 1.89482 | 1.89482 |
| Tmem184b      | NM_172608    | 5.20E-07    | 1.8947  | 1.8947  |
| BC057022      | BC057022     | 7.04E-07    | 1.89309 | 1.89309 |
| Mfap2         | NM_008546    | 8.27E-06    | 1.89272 | 1.89272 |
| Ncor2         | NM_011424    | 3.60E-07    | 1.89097 | 1.89097 |
| Pik3r5        | NM_177320    | 5.68E-06    | 1.89095 | 1.89095 |
| Efna5         | NM_207654    | 3.26E-06    | 1.88677 | 1.88677 |
| Tnfsf4        | NM_009452    | 5.29E-06    | 1.88658 | 1.88658 |
| Tcfap2e       | NM_198960    | 8.41E-05    | 1.88306 | 1.88306 |
| Prss42        | NM_153099    | 3.09E-06    | 1.88292 | 1.88292 |
| Ces2          | NM_145603    | 1.78E-07    | 1.88267 | 1.88267 |
| Rbm17         | NM_152824    | 3.09E-07    | 1.87966 | 1.87966 |
| Slc22a14      | NM_001037749 | 9.06E-05    | 1.87847 | 1.87847 |
| Clic6         | NM_172469    | 0.000543758 | 1.87596 | 1.87596 |
| Plcl2         | NM_013880    | 8.32E-06    | 1.86823 | 1.86823 |
| Stard10       | NM_019990    | 1.38E-06    | 1.86634 | 1.86634 |
| Unc13d        | NM_001009573 | 4.89E-07    | 1.86265 | 1.86265 |
| Txndc2        | NM_001146002 | 3.00E-06    | 1.86244 | 1.86244 |
| Dhrs11        | NM_177564    | 9.20E-07    | 1.86216 | 1.86216 |
| Wscd1         | NM_177618    | 3.47E-06    | 1.86171 | 1.86171 |
| Casd1         | NM_145398    | 1.23E-05    | 1.85903 | 1.85903 |
| Slc22a18      | NM_001042760 | 3.77E-06    | 1.85872 | 1.85872 |
| Bgn           | NM_007542    | 6.21E-06    | 1.85839 | 1.85839 |
| Sgsm3         | NM_134091    | 1.62E-05    | 1.85815 | 1.85815 |
| Xaf1          | NM_001037713 | 2.30E-07    | 1.85738 | 1.85738 |
| Eps8          | NM_007945    | 3.13E-06    | 1.85713 | 1.85713 |
| Eid2b         | NM_001177427 | 9.25E-05    | 1.8565  | 1.8565  |
| Aox4          | NM_023631    | 1.44E-08    | 1.85475 | 1.85475 |
| Ddx59         | NM_026500    | 2.16E-05    | 1.8522  | 1.8522  |
| Mmp2          | NM_008610    | 1.28E-06    | 1.85077 | 1.85077 |
| Trim47        | NM_172570    | 2.17E-06    | 1.8505  | 1.8505  |
| Dnaic1        | NM_175138    | 5.80E-08    | 1.8505  | 1.8505  |
| Card11        | NM_175362    | 2.12E-05    | 1.84976 | 1.84976 |
| Naglu         | NM_013792    | 0.000248745 | 1.84929 | 1.84929 |
| Ppcdc         | NM_176831    | 1.64E-07    | 1.84809 | 1.84809 |
| Cpxm1         | NM_019696    | 9.43E-05    | 1.84637 | 1.84637 |
| C530005A16Rik | NR_029450    | 1.73E-06    | 1.84354 | 1.84354 |
| Taco1         | NM_027346    | 5.84E-05    | 1.84353 | 1.84353 |
| Ttc39a        | NM_153392    | 7.40E-09    | 1.84311 | 1.84311 |
| Cdh3          | NM_001037809 | 1.80E-05    | 1.84193 | 1.84193 |
| Serpina3n     | NM_009252    | 1.03E-07    | 1.84162 | 1.84162 |
| Apbb2         | NM_009686    | 2.67E-06    | 1.84052 | 1.84052 |
| Chchd5        | NM_025395    | 0.000901232 | 1.84044 | 1.84044 |

|               |              |             |         |         |
|---------------|--------------|-------------|---------|---------|
| Chst11        | NM_021439    | 7.40E-06    | 1.83982 | 1.83982 |
| Tmprss3       | NM_001163776 | 1.17E-07    | 1.83928 | 1.83928 |
| Hipk3         | NM_010434    | 6.48E-07    | 1.83673 | 1.83673 |
| Fndc1         | NM_001081416 | 4.93E-08    | 1.83568 | 1.83568 |
| Rabgef1       | NM_019983    | 1.33E-06    | 1.83558 | 1.83558 |
| Col7a1        | NM_007738    | 2.71E-08    | 1.83459 | 1.83459 |
| Trpc1         | NM_011643    | 3.96E-07    | 1.83431 | 1.83431 |
| Gm52          | NM_001013751 | 1.02E-06    | 1.82937 | 1.82937 |
| Nod2          | NM_145857    | 2.65E-06    | 1.82849 | 1.82849 |
| Trpm1         | NM_001039104 | 8.40E-07    | 1.82776 | 1.82776 |
| Best1         | NM_011913    | 1.90E-09    | 1.82771 | 1.82771 |
| Dmrtc1c       | NM_001142691 | 7.37E-06    | 1.82736 | 1.82736 |
| Tmem132c      | NM_175432    | 7.02E-08    | 1.82729 | 1.82729 |
| Kremen2       | NM_028416    | 0.000110163 | 1.82685 | 1.82685 |
| Cd320         | NM_019421    | 1.05E-07    | 1.82671 | 1.82671 |
| Mc5r          | NM_013596    | 1.49E-05    | 1.82652 | 1.82652 |
| Fam168a       | BC079886     | 8.55E-06    | 1.82587 | 1.82587 |
| 2010001M09Rik | NM_027222    | 7.80E-06    | 1.825   | 1.825   |
| Apol10b       | NM_177820    | 1.90E-08    | 1.82421 | 1.82421 |
| 3110040M04Rik | AK014162     | 7.76E-07    | 1.82382 | 1.82382 |
| Fuz           | NM_027376    | 1.89E-08    | 1.82371 | 1.82371 |
| Vgll3         | NM_028572    | 7.90E-05    | 1.82311 | 1.82311 |
| Scrn3         | NM_029022    | 1.36E-07    | 1.82143 | 1.82143 |
| Twsg1         | NM_023053    | 1.58E-07    | 1.82136 | 1.82136 |
| Otog          | NM_013624    | 8.31E-06    | 1.82122 | 1.82122 |
| Cpox          | NM_007757    | 2.70E-05    | 1.81973 | 1.81973 |
| Mdm1          | NM_001162904 | 3.41E-07    | 1.81864 | 1.81864 |
| Hydin         | NM_172916    | 3.11E-08    | 1.81769 | 1.81769 |
| Clpb          | NM_009191    | 7.76E-07    | 1.81613 | 1.81613 |
| Pacsin1       | NM_011861    | 2.88E-07    | 1.81231 | 1.81231 |
| Itga4         | NM_010576    | 1.31E-05    | 1.81193 | 1.81193 |
| Antxr1        | NM_054041    | 1.17E-05    | 1.81185 | 1.81185 |
| Plxnd1        | NM_026376    | 4.01E-06    | 1.81137 | 1.81137 |
| Eppk1         | NM_144848    | 5.35E-05    | 1.81119 | 1.81119 |
| Hic1          | NM_010430    | 5.92E-06    | 1.81099 | 1.81099 |
| Serpinf1      | NM_011340    | 1.77E-06    | 1.80935 | 1.80935 |
| P2rx5         | NM_033321    | 9.53E-09    | 1.80883 | 1.80883 |
| Sgpp1         | NM_030750    | 1.10E-06    | 1.8086  | 1.8086  |
| Plcb4         | NM_013829    | 1.32E-07    | 1.80713 | 1.80713 |
| Pla2g2c       | NM_008868    | 8.78E-05    | 1.80615 | 1.80615 |
| Rpgrip1l      | NM_173431    | 2.18E-06    | 1.80614 | 1.80614 |
| Gca           | NM_145523    | 7.51E-06    | 1.80557 | 1.80557 |
| St3gal3       | NM_009176    | 1.46E-05    | 1.80525 | 1.80525 |



|               |                    |             |         |         |
|---------------|--------------------|-------------|---------|---------|
| Cnn1          | NM_009922          | 4.19E-06    | 1.80496 | 1.80496 |
| Lefty1        | NM_010094          | 1.28E-05    | 1.80426 | 1.80426 |
| Lrrfip1       | NM_008515          | 2.54E-08    | 1.80307 | 1.80307 |
| Olfm1         | NM_019498          | 1.85E-08    | 1.80301 | 1.80301 |
| Parm1         | NM_145562          | 9.18E-07    | 1.80295 | 1.80295 |
| Mbnl2         | NM_175341          | 3.22E-06    | 1.80221 | 1.80221 |
| Crtc1         | NM_001004062       | 8.50E-08    | 1.80204 | 1.80204 |
| Map3k14       | NM_016896          | 1.22E-07    | 1.80021 | 1.80021 |
| A430089I19Rik | NM_177913          | 4.87E-05    | 1.80013 | 1.80013 |
| Ppp1r13b      | NM_011625          | 7.73E-05    | 1.79732 | 1.79732 |
| Ryr1          | NM_009109          | 4.68E-08    | 1.7972  | 1.7972  |
| Mmel1         | NM_013783          | 1.03E-05    | 1.79717 | 1.79717 |
| Ccdc155       | NM_201374          | 5.77E-08    | 1.79665 | 1.79665 |
| Necab3        | NM_021546          | 8.87E-06    | 1.79482 | 1.79482 |
| G730007D18Rik | AK144596           | 2.02E-05    | 1.79432 | 1.79432 |
| Kndc1         | NM_177261          | 1.95E-06    | 1.79269 | 1.79269 |
| Lama3         | NM_010680          | 6.98E-08    | 1.79194 | 1.79194 |
| Man2b2        | NM_008550          | 9.34E-08    | 1.79025 | 1.79025 |
| H19           | NR_001592          | 3.64E-06    | 1.79001 | 1.79001 |
| Svil          | NM_153153          | 8.09E-09    | 1.78716 | 1.78716 |
| Mastl         | ENSMUST00000028119 | 3.23E-05    | 1.78711 | 1.78711 |
| Lrrc28        | NM_175124          | 4.76E-06    | 1.78596 | 1.78596 |
| Lrp1          | NM_008512          | 1.38E-07    | 1.78569 | 1.78569 |
| Lgr6          | NM_001033409       | 2.56E-05    | 1.78544 | 1.78544 |
| Ptprn         | NM_008985          | 1.50E-06    | 1.78525 | 1.78525 |
| BC066135      | NM_173031          | 4.38E-06    | 1.78447 | 1.78447 |
| Npc1l1        | NM_207242          | 1.26E-07    | 1.78334 | 1.78334 |
| Phf1          | NM_009343          | 1.32E-06    | 1.78315 | 1.78315 |
| Srgap3        | NM_080448          | 0.000659081 | 1.7828  | 1.7828  |
| Grm2          | NM_001160353       | 2.24E-05    | 1.78156 | 1.78156 |
| Fat1          | NM_001081286       | 2.73E-06    | 1.77859 | 1.77859 |
| Kcnt1         | NM_175462          | 8.54E-06    | 1.77646 | 1.77646 |
| Tead3         | NM_001098226       | 2.02E-06    | 1.77495 | 1.77495 |
| Vamp2         | NM_009497          | 2.20E-06    | 1.77389 | 1.77389 |
| Syne1         | NM_001079686       | 2.77E-08    | 1.77132 | 1.77132 |
| Sipa1l3       | NM_001081028       | 1.89E-07    | 1.77127 | 1.77127 |
| Srgap2        | NM_001081011       | 2.83E-06    | 1.77081 | 1.77081 |
| Fam126a       | NM_053090          | 3.87E-08    | 1.77012 | 1.77012 |
| Map4k1        | NM_008279          | 3.22E-07    | 1.7699  | 1.7699  |
| Cyp4f14       | NM_022434          | 5.37E-05    | 1.76978 | 1.76978 |
| Haus2         | NM_025475          | 0.000137386 | 1.76936 | 1.76936 |
| Pde2a         | NM_001143848       | 2.42E-07    | 1.76894 | 1.76894 |
| Ttll10        | NM_029264          | 2.87E-07    | 1.76781 | 1.76781 |

|               |                    |             |         |         |
|---------------|--------------------|-------------|---------|---------|
| Selplg        | NM_009151          | 2.44E-06    | 1.76553 | 1.76553 |
| 2410124H12Rik | ENSMUST00000054592 | 3.62E-05    | 1.76548 | 1.76548 |
| Gm10856       | ENSMUST00000100431 | 5.11E-05    | 1.76483 | 1.76483 |
| Loxl3         | NM_013586          | 3.33E-06    | 1.7644  | 1.7644  |
| Inf2          | NM_198411          | 4.53E-07    | 1.76432 | 1.76432 |
| Hspb2         | NM_024441          | 8.73E-05    | 1.76401 | 1.76401 |
| Cyp46a1       | NM_010010          | 2.59E-07    | 1.76356 | 1.76356 |
| Kcnn3         | NM_080466          | 5.84E-06    | 1.76328 | 1.76328 |
| Gm4779        | ENSMUST00000056225 | 0.000241255 | 1.76137 | 1.76137 |
| Polr2b        | NM_153798          | 6.29E-09    | 1.76102 | 1.76102 |
| St6galnac4    | NM_011373          | 4.51E-06    | 1.76101 | 1.76101 |
| Slc38a7       | NM_172758          | 5.73E-06    | 1.76018 | 1.76018 |
| Calr4         | NM_001033226       | 1.94E-07    | 1.75921 | 1.75921 |
| Hhip1         | NM_001044380       | 3.61E-06    | 1.75919 | 1.75919 |
| Pkd1          | NM_013630          | 7.24E-06    | 1.75828 | 1.75828 |
| Jakmip3       | NM_028708          | 3.20E-05    | 1.75758 | 1.75758 |
| Duoxa2        | NM_025777          | 5.67E-06    | 1.75692 | 1.75692 |
| Prkce         | NM_011104          | 4.50E-06    | 1.75631 | 1.75631 |
| Cd300a        | NM_170758          | 2.12E-08    | 1.75267 | 1.75267 |
| Rev1          | NM_019570          | 8.21E-06    | 1.75235 | 1.75235 |
| Clec16a       | NM_177562          | 7.91E-06    | 1.75194 | 1.75194 |
| Spag4         | NM_139151          | 1.60E-05    | 1.75186 | 1.75186 |
| 6430548M08Rik | NM_172286          | 9.93E-09    | 1.75099 | 1.75099 |
| Clca5         | NM_178697          | 1.01E-06    | 1.7498  | 1.7498  |
| Gnaz          | NM_010311          | 4.84E-05    | 1.74857 | 1.74857 |
| Als2          | NM_028717          | 2.12E-05    | 1.7467  | 1.7467  |
| Lztr1         | NM_025808          | 1.60E-06    | 1.74605 | 1.74605 |
| Zmat3         | NM_009517          | 1.17E-05    | 1.74499 | 1.74499 |
| Cebpb         | NM_009883          | 3.54E-06    | 1.74474 | 1.74474 |
| 2410089E03Rik | NM_001162906       | 1.92E-06    | 1.74467 | 1.74467 |
| D730001G18Rik | NR_027836          | 7.66E-07    | 1.74401 | 1.74401 |
| Ankrd13a      | NM_026718          | 0.000106546 | 1.74185 | 1.74185 |
| Xrcc1         | NM_009532          | 2.71E-09    | 1.74049 | 1.74049 |
| Ptpn7         | NM_177081          | 1.49E-05    | 1.73931 | 1.73931 |
| Vipr1         | NM_011703          | 4.60E-07    | 1.73577 | 1.73577 |
| Nfasc         | NM_182716          | 2.25E-06    | 1.73534 | 1.73534 |
| Cdon          | NM_021339          | 3.53E-06    | 1.73384 | 1.73384 |
| Trim71        | NM_001042503       | 2.25E-06    | 1.73352 | 1.73352 |
| Ncan          | NM_007789          | 5.59E-07    | 1.73312 | 1.73312 |
| Mfge8         | NM_008594          | 2.39E-06    | 1.73133 | 1.73133 |
| Tgfbr1        | NM_009370          | 2.43E-07    | 1.73029 | 1.73029 |
| Cobll1        | NM_177025          | 2.54E-07    | 1.72967 | 1.72967 |
| Pla2g4a       | NM_008869          | 0.000126054 | 1.72934 | 1.72934 |

|               |              |             |         |         |
|---------------|--------------|-------------|---------|---------|
| Eya2          | NM_010165    | 2.76E-06    | 1.72906 | 1.72906 |
| Fbxo47        | NM_001081435 | 2.86E-06    | 1.72852 | 1.72852 |
| Hs2st1        | NM_011828    | 2.02E-05    | 1.72712 | 1.72712 |
| Palm          | NM_023128    | 1.78E-06    | 1.72525 | 1.72525 |
| Spatc1        | NM_028852    | 1.20E-05    | 1.7248  | 1.7248  |
| Prkcb         | NM_008855    | 2.94E-07    | 1.72462 | 1.72462 |
| Inca1         | NM_213729    | 1.62E-05    | 1.72447 | 1.72447 |
| Trf           | NM_133977    | 1.25E-07    | 1.72414 | 1.72414 |
| Moxd1         | NM_021509    | 8.98E-06    | 1.72361 | 1.72361 |
| Nos2          | NM_010927    | 1.14E-06    | 1.72284 | 1.72284 |
| Tub           | NM_021885    | 1.78E-05    | 1.72272 | 1.72272 |
| Cdc23         | NM_178347    | 5.26E-06    | 1.72268 | 1.72268 |
| Sema4d        | NM_013660    | 6.01E-07    | 1.72227 | 1.72227 |
| Wdr25         | NM_177602    | 3.46E-05    | 1.72186 | 1.72186 |
| Duxbl         | NM_183389    | 2.97E-05    | 1.72124 | 1.72124 |
| Zfp167        | NM_001177505 | 0.000782323 | 1.72108 | 1.72108 |
| Poll          | NM_020032    | 7.10E-07    | 1.72053 | 1.72053 |
| Olfr1410      | NM_146491    | 3.59E-05    | 1.71883 | 1.71883 |
| Fstl3         | NM_031380    | 4.62E-07    | 1.7185  | 1.7185  |
| Jak3          | NM_010589    | 7.17E-08    | 1.71831 | 1.71831 |
| Eya4          | NM_010167    | 1.46E-07    | 1.71738 | 1.71738 |
| 1700013B16Rik | NM_028157    | 1.42E-06    | 1.71699 | 1.71699 |
| Bicc1         | NM_031397    | 7.47E-07    | 1.7162  | 1.7162  |
| Mpp2          | NM_016695    | 1.02E-05    | 1.71614 | 1.71614 |
| Ak3           | NM_021299    | 7.70E-06    | 1.71313 | 1.71313 |
| Prss39        | NM_009355    | 1.11E-05    | 1.71272 | 1.71272 |
| Caps2         | NM_178278    | 6.02E-05    | 1.71255 | 1.71255 |
| 1700016M24Rik | BC111897     | 1.23E-07    | 1.71179 | 1.71179 |
| Upf2          | NM_001081132 | 0.000236462 | 1.7109  | 1.7109  |
| Ache          | NM_009599    | 9.28E-05    | 1.71059 | 1.71059 |
| Pde4a         | NM_183408    | 2.24E-05    | 1.70999 | 1.70999 |
| Gstm7         | NM_026672    | 1.64E-06    | 1.70922 | 1.70922 |
| Gm5488        | XM_001480385 | 0.000224721 | 1.70921 | 1.70921 |
| Lamb3         | NM_008484    | 1.11E-08    | 1.70917 | 1.70917 |
| Fam83a        | NM_173862    | 1.91E-05    | 1.7084  | 1.7084  |
| Ttc7          | NM_028639    | 2.82E-07    | 1.70763 | 1.70763 |
| Rtn4ip1       | NM_130892    | 2.36E-06    | 1.70634 | 1.70634 |
| Bag4          | NM_026121    | 5.16E-09    | 1.70619 | 1.70619 |
| Zfp692        | NM_182996    | 1.49E-06    | 1.70509 | 1.70509 |
| Raver2        | NM_183024    | 2.24E-06    | 1.70382 | 1.70382 |
| Ninl          | NM_207204    | 1.43E-06    | 1.70368 | 1.70368 |
| Smad3         | NM_016769    | 1.76E-06    | 1.70008 | 1.70008 |
| 8430419L09Rik | NM_028982    | 4.66E-07    | 1.6999  | 1.6999  |

|               |                    |             |         |         |
|---------------|--------------------|-------------|---------|---------|
| Gm5301        | XM_621704          | 1.15E-06    | 1.69777 | 1.69777 |
| Pwp2          | NM_029546          | 4.52E-07    | 1.69761 | 1.69761 |
| Shank2        | ENSMUST00000105902 | 9.84E-05    | 1.69679 | 1.69679 |
| Catsperg1     | NM_001164658       | 8.13E-05    | 1.69599 | 1.69599 |
| Bai3          | NM_175642          | 8.49E-05    | 1.69537 | 1.69537 |
| Hecw2         | NM_001001883       | 9.32E-05    | 1.69494 | 1.69494 |
| Gramd1b       | NM_172768          | 7.72E-05    | 1.69446 | 1.69446 |
| Plekho2       | NM_153119          | 1.76E-06    | 1.69307 | 1.69307 |
| Mtus2         | NM_029920          | 1.69E-08    | 1.6924  | 1.6924  |
| Flt4          | NM_008029          | 9.68E-06    | 1.69107 | 1.69107 |
| Pls1          | NM_001033210       | 1.99E-06    | 1.69017 | 1.69017 |
| Gm1467        | XM_357906          | 4.37E-05    | 1.69016 | 1.69016 |
| Nodal         | NM_013611          | 3.88E-06    | 1.68978 | 1.68978 |
| Capn3         | NM_007601          | 6.62E-09    | 1.68898 | 1.68898 |
| Ets1          | NM_011808          | 3.52E-07    | 1.68799 | 1.68799 |
| Apob          | NM_009693          | 5.81E-08    | 1.68714 | 1.68714 |
| 1190002A17Rik | NM_001033874       | 3.94E-06    | 1.68507 | 1.68507 |
| Zscan29       | NM_178889          | 3.32E-05    | 1.68435 | 1.68435 |
| Lamc3         | NM_011836          | 2.42E-05    | 1.68382 | 1.68382 |
| Bik           | NM_007546          | 6.56E-06    | 1.68288 | 1.68288 |
| Tdrd9         | NM_029056          | 4.24E-05    | 1.68149 | 1.68149 |
| Cspg4         | NM_139001          | 0.000274113 | 1.67969 | 1.67969 |
| Nceh1         | NM_178772          | 7.11E-05    | 1.6752  | 1.6752  |
| BC005764      | NR_033210          | 1.27E-05    | 1.67367 | 1.67367 |
| Slc18a3       | NM_021712          | 0.000631122 | 1.67341 | 1.67341 |
| Invs          | NM_010569          | 3.65E-06    | 1.67242 | 1.67242 |
| Usp40         | NM_001033291       | 3.13E-06    | 1.6716  | 1.6716  |
| Pgf           | NM_008827          | 4.72E-05    | 1.67077 | 1.67077 |
| Rab11fip3     | NM_001162869       | 1.12E-06    | 1.67025 | 1.67025 |
| Pkd2l2        | NM_016927          | 0.000244831 | 1.66955 | 1.66955 |
| Tex21         | NM_019784          | 1.02E-05    | 1.66951 | 1.66951 |
| Gm9909        | ENSMUST00000054120 | 5.90E-05    | 1.66912 | 1.66912 |
| Pld4          | NM_178911          | 2.57E-08    | 1.66898 | 1.66898 |
| Foxn4         | NM_148935          | 4.95E-07    | 1.66837 | 1.66837 |
| Crhr2         | NM_009953          | 2.45E-06    | 1.66828 | 1.66828 |
| 1700024P16Rik | NM_001162980       | 3.27E-06    | 1.66204 | 1.66204 |
| Ccdc64        | NM_001080808       | 7.65E-07    | 1.66191 | 1.66191 |
| Myh7          | NM_080728          | 5.78E-07    | 1.66127 | 1.66127 |
| Il4ra         | NM_001008700       | 1.68E-07    | 1.66085 | 1.66085 |
| Sh2b2         | NM_018825          | 1.12E-06    | 1.66073 | 1.66073 |
| Bmp1          | NR_033241          | 0.000159229 | 1.66054 | 1.66054 |
| Glis1         | NM_147221          | 7.96E-06    | 1.6603  | 1.6603  |
| Nlrp14        | NM_001002894       | 1.30E-06    | 1.65977 | 1.65977 |

|               |                |             |         |         |
|---------------|----------------|-------------|---------|---------|
| Hapln3        | NM_178255      | 9.08E-06    | 1.65755 | 1.65755 |
| Fmnl3         | NM_011711      | 2.79E-07    | 1.65669 | 1.65669 |
| Mgmt          | NM_008598      | 2.48E-05    | 1.65644 | 1.65644 |
| Klhl5         | NM_175174      | 5.05E-07    | 1.65616 | 1.65616 |
| Trappc10      | NM_001081055   | 1.01E-05    | 1.64959 | 1.64959 |
| Fam20c        | NM_030565      | 2.36E-06    | 1.64824 | 1.64824 |
| Itgav         | NM_008402      | 7.47E-08    | 1.6482  | 1.6482  |
| Myo5c         | NM_001081322   | 2.87E-06    | 1.64799 | 1.64799 |
| Slc2a5        | NM_019741      | 1.88E-05    | 1.64714 | 1.64714 |
| Mrps6         | NM_080456      | 2.58E-05    | 1.64594 | 1.64594 |
| Spata21       | NM_177867      | 7.01E-07    | 1.64243 | 1.64243 |
| Glrb          | NM_010298      | 7.16E-05    | 1.64222 | 1.64222 |
| Snrk          | NM_133741      | 2.77E-07    | 1.64148 | 1.64148 |
| Iqsec1        | NM_001134384   | 4.06E-06    | 1.64136 | 1.64136 |
| Prmt2         | NM_133182      | 7.39E-06    | 1.64113 | 1.64113 |
| Map3k7        | NM_009316      | 3.36E-07    | 1.63966 | 1.63966 |
| Snx25         | NM_207213      | 2.44E-05    | 1.63911 | 1.63911 |
| Arfgap3       | NM_025445      | 0.000452425 | 1.63897 | 1.63897 |
| Mlycd         | NM_019966      | 0.000242822 | 1.63766 | 1.63766 |
| Lhfp12        | NM_172589      | 0.000190609 | 1.63658 | 1.63658 |
| Fam65a        | NM_001081241   | 1.14E-05    | 1.63648 | 1.63648 |
| Traf3         | NM_011632      | 3.66E-05    | 1.63152 | 1.63152 |
| Bbs4          | NM_175325      | 3.13E-05    | 1.63104 | 1.63104 |
| Rabgap1       | NM_146121      | 6.14E-06    | 1.62976 | 1.62976 |
|               | 5-三月 NM_027314 | 9.70E-05    | 1.62963 | 1.62963 |
| Gm4782        | XR_032186      | 9.02E-07    | 1.62931 | 1.62931 |
| 2310033E01Rik | BC139039       | 5.77E-07    | 1.62826 | 1.62826 |
| Gyg           | NM_013755      | 2.22E-05    | 1.62824 | 1.62824 |
| Epb4.1l4b     | NM_019427      | 0.000150434 | 1.62748 | 1.62748 |
| Chl1          | NM_007697      | 6.26E-07    | 1.62533 | 1.62533 |
| Gpr87         | NM_032399      | 7.88E-05    | 1.62516 | 1.62516 |
| Kremen1       | NM_032396      | 9.57E-07    | 1.62334 | 1.62334 |
| Thoc6         | NM_001008425   | 0.000230033 | 1.6227  | 1.6227  |
| Doc2g         | NM_021791      | 3.26E-06    | 1.62078 | 1.62078 |
| Mapk8ip3      | NM_013931      | 1.26E-06    | 1.62044 | 1.62044 |
| Elmo3         | NM_172760      | 1.28E-05    | 1.6199  | 1.6199  |
| Qsox1         | NM_001024945   | 1.89E-05    | 1.61911 | 1.61911 |
| Nphp4         | NM_153424      | 3.01E-06    | 1.61842 | 1.61842 |
| Gipc3         | NM_148951      | 6.80E-05    | 1.61764 | 1.61764 |
| Gm10768       | NR_033472      | 0.000217214 | 1.61722 | 1.61722 |
| Thra          | NM_178060      | 1.39E-07    | 1.61642 | 1.61642 |
| Catsperg2     | NM_029714      | 8.01E-06    | 1.61642 | 1.61642 |
| Slc22a20      | NM_198650      | 3.08E-05    | 1.61298 | 1.61298 |

|               |              |             |         |         |
|---------------|--------------|-------------|---------|---------|
| Ppp1r3c       | NM_016854    | 9.54E-05    | 1.61095 | 1.61095 |
| Pkp3          | NM_019762    | 5.25E-06    | 1.60984 | 1.60984 |
| Hgsnat        | NM_029884    | 7.71E-11    | 1.60983 | 1.60983 |
| Fam113a       | NM_178762    | 6.54E-05    | 1.608   | 1.608   |
| Adcyap1r1     | NM_007407    | 1.18E-05    | 1.60686 | 1.60686 |
| Cul9          | NM_001081335 | 8.58E-08    | 1.60568 | 1.60568 |
| Ptpru         | NM_001083119 | 2.21E-07    | 1.60531 | 1.60531 |
| E330020D12Rik | NM_001177359 | 2.18E-06    | 1.60437 | 1.60437 |
| Disp1         | NM_026866    | 0.00014303  | 1.60424 | 1.60424 |
| Zfp809        | NM_172763    | 0.000790554 | 1.60417 | 1.60417 |
| Gpc1          | NM_016696    | 0.00044049  | 1.60387 | 1.60387 |
| Nfatc1        | NM_001164109 | 1.93E-06    | 1.60355 | 1.60355 |
| Impdh1        | NM_011829    | 1.03E-07    | 1.60334 | 1.60334 |
| Phc2          | NM_018774    | 3.01E-06    | 1.60197 | 1.60197 |
| Cnm2          | NM_033569    | 1.41E-05    | 1.60158 | 1.60158 |
| Birc7         | NM_001163247 | 3.83E-07    | 1.60118 | 1.60118 |
| Plcg1         | NM_021280    | 0.000176232 | 1.59835 | 1.59835 |
| Clip4         | NM_030179    | 8.84E-05    | 1.59822 | 1.59822 |
| Mthfsd        | NM_172761    | 2.22E-07    | 1.59746 | 1.59746 |
| Camk2b        | NM_007595    | 1.87E-08    | 1.59729 | 1.59729 |
| Abo           | NM_030718    | 1.35E-07    | 1.59653 | 1.59653 |
| 4930572J05Rik | NM_198607    | 0.00054857  | 1.59613 | 1.59613 |
| Gm5134        | NM_198635    | 2.14E-05    | 1.59558 | 1.59558 |
| Atmin         | NM_177700    | 1.50E-07    | 1.59534 | 1.59534 |
| Fam13a        | NM_153574    | 8.27E-06    | 1.59525 | 1.59525 |
| Col1a1        | NM_007742    | 4.62E-05    | 1.59512 | 1.59512 |
| Epb4.2        | NM_013513    | 1.45E-07    | 1.59476 | 1.59476 |
| Kif15         | NM_010620    | 0.000979437 | 1.59418 | 1.59418 |
| Lat           | NM_010689    | 0.000477439 | 1.59357 | 1.59357 |
| Ksr1          | NM_013571    | 2.58E-08    | 1.5932  | 1.5932  |
| Zfp498        | NM_001081431 | 7.37E-06    | 1.592   | 1.592   |
| Gria4         | NM_019691    | 1.56E-05    | 1.59199 | 1.59199 |
| Sec24a        | NM_175255    | 0.000312806 | 1.59189 | 1.59189 |
| Pla2g2e       | NM_012044    | 6.96E-08    | 1.59165 | 1.59165 |
| Jag1          | NM_013822    | 7.21E-05    | 1.59052 | 1.59052 |
| Nt5dc3        | NM_175331    | 4.51E-05    | 1.59013 | 1.59013 |
| Gsto2         | NM_026619    | 3.44E-07    | 1.5899  | 1.5899  |
| Bglap2        | NM_001032298 | 3.45E-05    | 1.58933 | 1.58933 |
| Nr1i2         | NM_010936    | 1.36E-05    | 1.58849 | 1.58849 |
| Gsto1         | NM_010362    | 3.26E-05    | 1.5878  | 1.5878  |
| Afmid         | NM_027827    | 1.34E-07    | 1.58719 | 1.58719 |
| Anks1         | NM_181413    | 1.63E-06    | 1.58679 | 1.58679 |
| Btbd12        | NM_177472    | 7.35E-06    | 1.58593 | 1.58593 |

|               |                    |             |         |         |
|---------------|--------------------|-------------|---------|---------|
| Cuedc1        | NM_198013          | 0.000652068 | 1.58572 | 1.58572 |
| Plb1          | NM_001081407       | 0.000177932 | 1.58503 | 1.58503 |
| 4930591A17Rik | ENSMUST00000041998 | 0.000103986 | 1.58494 | 1.58494 |
| Timp3         | NM_011595          | 3.00E-07    | 1.58472 | 1.58472 |
| Rgs5          | NM_009063          | 1.07E-05    | 1.5838  | 1.5838  |
| Wdr81         | NM_138950          | 2.55E-05    | 1.58086 | 1.58086 |
| Tom1l2        | NM_153080          | 3.53E-09    | 1.5799  | 1.5799  |
| Ubash3b       | NM_176860          | 8.21E-06    | 1.57922 | 1.57922 |
| Nt5c2         | NR_028353          | 0.000218729 | 1.57759 | 1.57759 |
| D930015E06Rik | NM_172681          | 2.60E-05    | 1.57721 | 1.57721 |
| Stx2          | NM_007941          | 3.04E-05    | 1.57668 | 1.57668 |
| Ski           | NM_011385          | 4.13E-06    | 1.57506 | 1.57506 |
| Unc5b         | NM_029770          | 6.49E-06    | 1.57498 | 1.57498 |
| Rab44         | NM_001002786       | 2.28E-06    | 1.57495 | 1.57495 |
| Plec          | NM_201391          | 1.92E-05    | 1.57179 | 1.57179 |
| Aqp6          | NM_175087          | 4.84E-05    | 1.57169 | 1.57169 |
| Pdzd2         | NM_001081064       | 0.000225472 | 1.56994 | 1.56994 |
| H6pd          | NM_173371          | 5.30E-06    | 1.56824 | 1.56824 |
| Cenpm         | NM_025639          | 0.000253016 | 1.56725 | 1.56725 |
| Gm13040       | NM_001113736       | 0.000813243 | 1.5665  | 1.5665  |
| Sema6a        | NM_018744          | 1.09E-05    | 1.56579 | 1.56579 |
| Cd7           | NM_009854          | 0.000177134 | 1.56489 | 1.56489 |
| Ephb2         | NM_010142          | 8.46E-07    | 1.56425 | 1.56425 |
| Haus6         | NM_173400          | 0.000435455 | 1.56416 | 1.56416 |
| Fam105a       | BC052328           | 4.31E-05    | 1.5635  | 1.5635  |
| Th            | NM_009377          | 4.38E-05    | 1.56293 | 1.56293 |
| Acot11        | NM_025590          | 1.55E-05    | 1.56104 | 1.56104 |
| Stk38l        | NM_172734          | 0.000561062 | 1.56033 | 1.56033 |
| Ccdc163       | NM_026714          | 0.000270737 | 1.55996 | 1.55996 |
| Ppm1n         | NM_177691          | 0.000337324 | 1.55884 | 1.55884 |
| Rnf41         | NM_001164237       | 2.41E-06    | 1.55819 | 1.55819 |
| Pacs1         | NM_153129          | 0.000173105 | 1.55801 | 1.55801 |
| Gbf1          | NM_178930          | 3.04E-06    | 1.55762 | 1.55762 |
| Rad9b         | NM_144912          | 0.000780036 | 1.55628 | 1.55628 |
| Thumpd2       | NM_028138          | 3.42E-06    | 1.55536 | 1.55536 |
| Sema6b        | NM_013662          | 3.42E-05    | 1.55531 | 1.55531 |
| Idh1          | NM_010497          | 4.16E-05    | 1.55508 | 1.55508 |
| Dopey2        | NM_027293          | 7.85E-07    | 1.55385 | 1.55385 |
| Mast4         | NM_175171          | 2.22E-06    | 1.55377 | 1.55377 |
| Piwil1        | NM_021311          | 1.16E-05    | 1.55372 | 1.55372 |
| Myo1e         | NM_181072          | 0.000575235 | 1.55226 | 1.55226 |
| Sp140         | NM_001013817       | 0.000131024 | 1.55104 | 1.55104 |
| Gipc2         | NM_016867          | 0.000132233 | 1.55056 | 1.55056 |

|               |                    |             |         |         |
|---------------|--------------------|-------------|---------|---------|
| Capn12        | NM_001110807       | 1.03E-06    | 1.5497  | 1.5497  |
| Ppp5c         | NM_011155          | 1.44E-06    | 1.54912 | 1.54912 |
| Pdlim3        | NM_016798          | 7.20E-06    | 1.54905 | 1.54905 |
| Mtss1l        | NM_198625          | 5.80E-05    | 1.54863 | 1.54863 |
| Otof          | NM_031875          | 8.94E-06    | 1.54737 | 1.54737 |
| C330024D21Rik | NR_015582          | 0.000205879 | 1.54369 | 1.54369 |
| Bmpr2         | NM_007561          | 0.000253007 | 1.54357 | 1.54357 |
| Zmpste24      | NM_172700          | 0.00010933  | 1.54105 | 1.54105 |
| Gramd4        | NM_172611          | 3.84E-06    | 1.54028 | 1.54028 |
| Mfsd7b        | NM_001081259       | 0.000114987 | 1.53975 | 1.53975 |
| Afap1l1       | NM_178928          | 5.36E-05    | 1.53751 | 1.53751 |
| Sin3b         | NM_009188          | 1.48E-06    | 1.5374  | 1.5374  |
| Ftsjd2        | NM_028791          | 0.000743679 | 1.53739 | 1.53739 |
| Gm4005        | XM_001476146       | 8.83E-06    | 1.53687 | 1.53687 |
| Tmem132a      | NM_133804          | 1.13E-05    | 1.53646 | 1.53646 |
| Wnt3a         | NM_009522          | 6.71E-05    | 1.5354  | 1.5354  |
| Gypa          | NM_010369          | 1.75E-05    | 1.53531 | 1.53531 |
| Cyp19a1       | NM_007810          | 3.72E-05    | 1.53512 | 1.53512 |
| BC011248      | NM_144857          | 3.80E-06    | 1.53398 | 1.53398 |
| D730039F16Rik | BC021771           | 1.52E-07    | 1.53325 | 1.53325 |
| Eif2ak1       | NM_013557          | 4.68E-07    | 1.53237 | 1.53237 |
| Gstm6         | NM_008184          | 7.56E-05    | 1.53153 | 1.53153 |
| Acad10        | NM_028037          | 2.69E-06    | 1.53135 | 1.53135 |
| Tmem131       | NM_018872          | 9.52E-05    | 1.53013 | 1.53013 |
| BC067074      | ENSMUST00000078163 | 2.06E-05    | 1.53011 | 1.53011 |
| Atl1          | NM_178628          | 0.000323448 | 1.53    | 1.53    |
| Fbxo28        | NM_175127          | 0.000984385 | 1.52927 | 1.52927 |
| Stox1         | NM_001033260       | 0.000240681 | 1.52857 | 1.52857 |
| Elovl1        | NM_019422          | 0.000772215 | 1.52679 | 1.52679 |
| Dvl3          | NM_007889          | 3.16E-07    | 1.52664 | 1.52664 |
| Git2          | NM_019834          | 9.95E-05    | 1.52541 | 1.52541 |
| Ttc38         | NM_001033337       | 0.000134638 | 1.52491 | 1.52491 |
| Gnb1l         | NM_023120          | 1.86E-06    | 1.52339 | 1.52339 |
| Ccdc151       | NM_001163787       | 0.00057169  | 1.52322 | 1.52322 |
| Pde11a        | NM_001081033       | 2.99E-06    | 1.52278 | 1.52278 |
| Utp20         | NM_175158          | 0.000429168 | 1.52276 | 1.52276 |
| Ttc17         | NM_183106          | 1.27E-05    | 1.5225  | 1.5225  |
| Trp53inp2     | NM_178111          | 6.86E-05    | 1.5225  | 1.5225  |
| Mup2          | NM_001045550       | 5.26E-08    | 1.52166 | 1.52166 |
| Arntl         | NM_007489          | 9.33E-06    | 1.52148 | 1.52148 |
| Hepacam       | NM_175189          | 0.00019118  | 1.52004 | 1.52004 |
| Crygf         | NM_027010          | 0.000531694 | 1.51946 | 1.51946 |
| Ccna1         | NM_007628          | 9.27E-06    | 1.51941 | 1.51941 |



|               |                    |             |         |         |
|---------------|--------------------|-------------|---------|---------|
| Prdm16        | NM_027504          | 9.56E-07    | 1.51929 | 1.51929 |
| Sec31b        | NM_001033343       | 0.000147523 | 1.51544 | 1.51544 |
| Csf1          | NM_007778          | 4.44E-07    | 1.5146  | 1.5146  |
| Ltf           | NM_008522          | 6.99E-05    | 1.51452 | 1.51452 |
| Rnasek        | NM_173742          | 4.30E-06    | 1.51418 | 1.51418 |
| Mknk2         | NM_021462          | 6.58E-06    | 1.51407 | 1.51407 |
| Hdgfrp3       | NM_013886          | 5.10E-05    | 1.51405 | 1.51405 |
| Mia2          | NM_177321          | 0.000855892 | 1.51261 | 1.51261 |
| Clip1         | NM_019765          | 5.17E-07    | 1.51145 | 1.51145 |
| Chst15        | NM_029935          | 3.27E-05    | 1.51005 | 1.51005 |
| Crocc         | NM_172122          | 1.02E-06    | 1.50978 | 1.50978 |
| Cpn1          | NM_030703          | 0.000238895 | 1.50711 | 1.50711 |
| Edc4          | NM_181594          | 0.000281567 | 1.50654 | 1.50654 |
| Inpp5d        | NM_010566          | 2.25E-07    | 1.50634 | 1.50634 |
| Mfap4         | NM_029568          | 0.000279259 | 1.50627 | 1.50627 |
| Usp50         | NM_029163          | 1.71E-05    | 1.50575 | 1.50575 |
| Selp          | NM_011347          | 0.00011697  | 1.50527 | 1.50527 |
| 1700048O20Rik | NR_033553          | 0.000834956 | 1.50512 | 1.50512 |
| 9530053A07Rik | NM_001164655       | 3.49E-05    | 1.50512 | 1.50512 |
| Zer1          | NM_178694          | 0.000130447 | 1.5045  | 1.5045  |
| Cav2          | NM_016900          | 0.000101835 | 1.50431 | 1.50431 |
| Nmt1          | NM_008707          | 2.04E-07    | 1.50408 | 1.50408 |
| Dhx35         | ENSMUST00000029186 | 6.76E-06    | 1.50341 | 1.50341 |
| Zfp74         | NM_178384          | 0.000122692 | 1.50334 | 1.50334 |
| Pdgfra        | NM_011058          | 0.00011681  | 1.50268 | 1.50268 |
| Pik3cb        | NM_029094          | 1.74E-06    | 1.50264 | 1.50264 |
| Epb4.111      | NM_013510          | 8.30E-05    | 1.50261 | 1.50261 |
| Rere          | NM_001085492       | 2.43E-05    | 1.50208 | 1.50208 |
| 9030409G11Rik | NM_144531          | 1.79E-05    | 1.50155 | 1.50155 |
| Mef2a         | NM_001033713       | 5.98E-06    | 1.50144 | 1.50144 |
| Pnpla1        | NM_001034885       | 0.000111193 | 1.50144 | 1.50144 |
| Cic           | NM_027882          | 1.68E-05    | 1.50134 | 1.50134 |
| Klhl10        | NM_025727          | 0.00011246  | 1.50119 | 1.50119 |
| Coq2          | NM_027978          | 4.02E-05    | 1.5008  | 1.5008  |
| Myh14         | NM_028021          | 1.45E-05    | 1.50026 | 1.50026 |
| Pbx4          | NM_001024954       | 0.000993056 | 1.50008 | 1.50008 |
| Sesn1         | NM_001162908       | 6.70E-05    | 1.49994 | 1.49994 |
| Sync          | NM_023485          | 0.000661786 | 1.49935 | 1.49935 |
| lqcg          | NM_178378          | 7.87E-06    | 1.49856 | 1.49856 |
| Hes6          | NM_019479          | 2.20E-07    | 1.49814 | 1.49814 |
| Dnajb4        | NM_025926          | 0.000957901 | 1.49793 | 1.49793 |
| Vwf           | NM_011708          | 3.78E-06    | 1.49784 | 1.49784 |
| 4933409K07Rik | NR_033123          | 1.44E-05    | 1.49645 | 1.49645 |

|               |              |             |         |         |
|---------------|--------------|-------------|---------|---------|
| Nxn           | NM_008750    | 8.20E-06    | 1.49602 | 1.49602 |
| Fam149b       | NM_172379    | 8.43E-05    | 1.49594 | 1.49594 |
| Nedd9         | NM_001111324 | 0.000215373 | 1.49573 | 1.49573 |
| Ctnnd2        | NM_008729    | 9.28E-06    | 1.49555 | 1.49555 |
| Mad1l1        | NM_010752    | 3.59E-06    | 1.49407 | 1.49407 |
| Gpat2         | NM_001081089 | 4.44E-05    | 1.49294 | 1.49294 |
| Ankrd23       | NM_153502    | 0.000253169 | 1.49242 | 1.49242 |
| Fam120a       | NM_001033268 | 2.33E-08    | 1.49197 | 1.49197 |
| Katnal1       | NM_153572    | 0.000420264 | 1.49145 | 1.49145 |
| Rcan1         | NM_001081549 | 0.000259625 | 1.48744 | 1.48744 |
| Uckl1         | NM_026765    | 0.000708328 | 1.48722 | 1.48722 |
| Ccdc64b       | NM_153784    | 2.66E-07    | 1.48656 | 1.48656 |
| Slc27a4       | NM_011989    | 3.33E-05    | 1.48653 | 1.48653 |
| Cldn18        | NM_019815    | 1.10E-05    | 1.48542 | 1.48542 |
| Fam78a        | BC137951     | 0.000205245 | 1.485   | 1.485   |
| Nrip2         | NM_021717    | 4.86E-06    | 1.48477 | 1.48477 |
| Hlcs          | NM_139145    | 0.000168375 | 1.48431 | 1.48431 |
| Pkn3          | NM_153805    | 2.32E-05    | 1.48424 | 1.48424 |
| Kdm1b         | NM_172262    | 0.000123094 | 1.48354 | 1.48354 |
| Rsu1          | NM_009105    | 5.39E-05    | 1.48335 | 1.48335 |
| Gm1661        | NM_001145637 | 5.56E-06    | 1.48315 | 1.48315 |
| Obfc2b        | NM_027257    | 6.81E-07    | 1.48296 | 1.48296 |
| Tecpr2        | NM_001081057 | 3.09E-06    | 1.48246 | 1.48246 |
| Ret           | NM_001080780 | 2.39E-06    | 1.48215 | 1.48215 |
| Cxcl14        | NM_019568    | 0.000341872 | 1.48205 | 1.48205 |
| Mgat5b        | NM_172948    | 7.18E-05    | 1.48061 | 1.48061 |
| Plxb1         | NM_172775    | 5.30E-05    | 1.48003 | 1.48003 |
| Mtmr10        | NM_172742    | 7.49E-05    | 1.47911 | 1.47911 |
| Traf1         | NM_009421    | 6.32E-05    | 1.47862 | 1.47862 |
| Ankrd13b      | NM_172945    | 3.31E-06    | 1.47805 | 1.47805 |
| 6230409E13Rik | NM_175234    | 0.000176713 | 1.47697 | 1.47697 |
| Synj1         | NM_001045515 | 0.000216757 | 1.47467 | 1.47467 |
| Fam129c       | NM_001166213 | 2.70E-05    | 1.474   | 1.474   |
| Csgalnact2    | NM_030165    | 3.14E-06    | 1.47359 | 1.47359 |
| Nudt5         | NM_016918    | 0.000959518 | 1.47342 | 1.47342 |
| Ky            | NM_024291    | 1.02E-05    | 1.4734  | 1.4734  |
| Ptprs         | NM_011218    | 3.96E-06    | 1.47337 | 1.47337 |
| Snx19         | NM_028874    | 0.000437944 | 1.47337 | 1.47337 |
| Kcnp2         | NM_145703    | 0.000220711 | 1.47327 | 1.47327 |
| Zfand2a       | NM_133349    | 0.000219625 | 1.47325 | 1.47325 |
| Ick           | NM_019987    | 0.000275063 | 1.47247 | 1.47247 |
| Atad3a        | NM_179203    | 3.04E-06    | 1.47192 | 1.47192 |
| Abhd6         | NM_025341    | 0.000170534 | 1.47134 | 1.47134 |

|               |              |             |         |         |
|---------------|--------------|-------------|---------|---------|
| Stk10         | NM_009288    | 1.24E-05    | 1.47093 | 1.47093 |
| Mthfd1        | NM_138745    | 1.21E-06    | 1.46998 | 1.46998 |
| Slc7a8        | NM_016972    | 1.28E-05    | 1.46947 | 1.46947 |
| Gm5887        | NM_001034903 | 9.95E-05    | 1.46835 | 1.46835 |
| Wipi1         | NM_145940    | 0.000436529 | 1.46827 | 1.46827 |
| Acsbg2        | NM_001039114 | 0.000372262 | 1.46769 | 1.46769 |
| Rnf166        | NM_001033142 | 0.000159604 | 1.46683 | 1.46683 |
| Dysf          | NM_021469    | 1.03E-06    | 1.46608 | 1.46608 |
| Slc2a10       | NM_130451    | 0.000272768 | 1.46587 | 1.46587 |
| Mst1r         | NM_009074    | 0.000244727 | 1.46573 | 1.46573 |
| Tmem211       | NM_001033428 | 0.000833875 | 1.46506 | 1.46506 |
| Scmh1         | NM_013883    | 0.000100738 | 1.46468 | 1.46468 |
| Zhx2          | NM_199449    | 0.000869915 | 1.46425 | 1.46425 |
| Ddx56         | NM_026538    | 0.000501868 | 1.46284 | 1.46284 |
| Rbm34         | NM_172762    | 3.63E-05    | 1.46278 | 1.46278 |
| Cacna1e       | NM_009782    | 1.92E-05    | 1.46218 | 1.46218 |
| Tmem8c        | NM_025376    | 0.000541826 | 1.46089 | 1.46089 |
| Rfx6          | NM_001159389 | 0.000133482 | 1.46069 | 1.46069 |
| Plk2          | NM_026163    | 0.000916895 | 1.46069 | 1.46069 |
| Nsf           | NM_008740    | 7.60E-06    | 1.45921 | 1.45921 |
| Trpa1         | NM_177781    | 5.40E-05    | 1.45909 | 1.45909 |
| Kcnb1         | NM_008420    | 0.000435391 | 1.45908 | 1.45908 |
| Ogdhl         | NM_001081130 | 9.26E-05    | 1.45884 | 1.45884 |
| Mobkl2a       | NM_172457    | 2.49E-05    | 1.45823 | 1.45823 |
| 5930434B04Rik | NM_029862    | 1.66E-05    | 1.45803 | 1.45803 |
| Tmem90a       | NM_001033334 | 0.000460576 | 1.45792 | 1.45792 |
| Bhlha15       | NM_010800    | 0.000100554 | 1.45686 | 1.45686 |
| Wnk2          | NM_029361    | 6.75E-05    | 1.45605 | 1.45605 |
| Pcsk6         | NM_011048    | 0.000180292 | 1.45547 | 1.45547 |
| Dnm2          | NM_001039520 | 5.92E-06    | 1.45452 | 1.45452 |
| Dok3          | NM_013739    | 1.52E-05    | 1.45342 | 1.45342 |
| Mapk13        | NM_011950    | 0.000133328 | 1.45311 | 1.45311 |
| Igf2r         | NM_010515    | 2.56E-05    | 1.45214 | 1.45214 |
| Trpv2         | NM_011706    | 3.51E-05    | 1.45174 | 1.45174 |
| Dak           | NM_145496    | 3.67E-06    | 1.4516  | 1.4516  |
| Ergic1        | NM_026170    | 1.04E-05    | 1.45089 | 1.45089 |
| Tmc3          | NM_177695    | 0.000140655 | 1.45037 | 1.45037 |
| Fam13c        | NM_024244    | 4.27E-07    | 1.45017 | 1.45017 |
| Arhgap21      | NM_001128084 | 0.000724512 | 1.44802 | 1.44802 |
| Large         | NM_010687    | 7.22E-05    | 1.44693 | 1.44693 |
| 4933430117Rik | BC116650     | 4.11E-05    | 1.4469  | 1.4469  |
| Ccdc73        | NM_177600    | 0.000871237 | 1.44671 | 1.44671 |
| Stra6         | NM_009291    | 8.20E-05    | 1.44542 | 1.44542 |

|               |              |             |         |         |
|---------------|--------------|-------------|---------|---------|
| Arhgef9       | NM_001033329 | 2.79E-06    | 1.44513 | 1.44513 |
| Gtf2e1        | NM_028812    | 1.69E-05    | 1.44414 | 1.44414 |
| Ptpn21        | NM_011877    | 3.78E-05    | 1.44397 | 1.44397 |
| Ifngr2        | NM_008338    | 0.000142634 | 1.44292 | 1.44292 |
| Flot2         | NM_008028    | 0.000906657 | 1.4422  | 1.4422  |
| Sympk         | NM_026605    | 1.72E-07    | 1.44129 | 1.44129 |
| Hspg2         | NM_008305    | 2.72E-05    | 1.44049 | 1.44049 |
| Ndn           | NM_010882    | 0.000240664 | 1.44011 | 1.44011 |
| 4933407H18Rik | NM_001081101 | 0.000149561 | 1.439   | 1.439   |
| BC057079      | NM_001081184 | 0.000147643 | 1.43867 | 1.43867 |
| Tacc2         | NM_001004468 | 0.000153695 | 1.43864 | 1.43864 |
| Agap3         | NM_139153    | 7.36E-06    | 1.43728 | 1.43728 |
| Folr2         | NM_008035    | 9.55E-05    | 1.43711 | 1.43711 |
| Mir93         | NR_029749    | 8.14E-05    | 1.43652 | 1.43652 |
| Fam184a       | NM_001081428 | 2.09E-05    | 1.43601 | 1.43601 |
| Mark4         | NM_172279    | 1.23E-05    | 1.43572 | 1.43572 |
| Msrp3         | NM_177092    | 8.13E-05    | 1.43441 | 1.43441 |
| Fam132a       | NM_026125    | 0.000313604 | 1.43402 | 1.43402 |
| Rbm20         | NM_001170847 | 1.67E-06    | 1.43368 | 1.43368 |
| Man2a1        | NM_008549    | 0.000193071 | 1.43321 | 1.43321 |
| Cyth3         | NM_011182    | 4.07E-05    | 1.43319 | 1.43319 |
| Capzb         | NM_001037761 | 5.78E-06    | 1.43314 | 1.43314 |
| Taf6          | NM_009315    | 1.52E-05    | 1.43237 | 1.43237 |
| Clstn3        | NM_153508    | 4.20E-05    | 1.43153 | 1.43153 |
| Sh3bp5        | NM_011894    | 1.01E-05    | 1.43115 | 1.43115 |
| Camk2a        | NM_177407    | 1.33E-05    | 1.43022 | 1.43022 |
| Rad51         | NM_011234    | 2.19E-06    | 1.4293  | 1.4293  |
| Nprl3         | NM_181569    | 1.12E-05    | 1.42911 | 1.42911 |
| Slc9a3r2      | NM_023055    | 0.000500987 | 1.42787 | 1.42787 |
| Drp2          | NM_010078    | 1.03E-06    | 1.42744 | 1.42744 |
| Smad9         | NM_019483    | 0.000679026 | 1.4268  | 1.4268  |
| Parp11        | NM_181402    | 0.000156746 | 1.42676 | 1.42676 |
| Zfp385c       | NM_177790    | 0.000163102 | 1.42587 | 1.42587 |
| Gm15800       | BC051044     | 3.43E-05    | 1.42553 | 1.42553 |
| Bai1          | NM_174991    | 9.91E-05    | 1.42488 | 1.42488 |
| Mbnl1         | NM_020007    | 8.58E-05    | 1.42387 | 1.42387 |
| Arpp21        | NM_033264    | 1.09E-06    | 1.42301 | 1.42301 |
| Glce          | NM_033320    | 3.51E-05    | 1.42176 | 1.42176 |
| Letm1         | NM_019694    | 0.000159364 | 1.42144 | 1.42144 |
| Lmod1         | NM_053106    | 3.20E-05    | 1.42106 | 1.42106 |
| Nos1          | NM_008712    | 9.66E-05    | 1.42023 | 1.42023 |
| 6230427J02Rik | NM_026597    | 0.000442125 | 1.41914 | 1.41914 |
| Itga10        | NM_001081053 | 0.000547574 | 1.41914 | 1.41914 |

|               |              |             |         |         |
|---------------|--------------|-------------|---------|---------|
| Clcn7         | NM_011930    | 0.000937454 | 1.41909 | 1.41909 |
| Prmt8         | NM_201371    | 0.000694539 | 1.41854 | 1.41854 |
| Rab11fip5     | NM_001003955 | 0.000682931 | 1.41827 | 1.41827 |
| Sec14l4       | NM_146013    | 1.38E-06    | 1.41751 | 1.41751 |
| Cyp2f2        | NM_007817    | 1.73E-06    | 1.41484 | 1.41484 |
| Cd82          | NM_007656    | 0.000914511 | 1.41471 | 1.41471 |
| Cdan1         | NM_026891    | 2.42E-05    | 1.41406 | 1.41406 |
| Hnf4a         | NM_008261    | 0.000238344 | 1.41404 | 1.41404 |
| Slc12a5       | NM_020333    | 2.97E-05    | 1.4134  | 1.4134  |
| Fam114a1      | NM_026667    | 0.000805764 | 1.41152 | 1.41152 |
| Wdr93         | NM_001037927 | 0.000134287 | 1.41134 | 1.41134 |
| Pak2          | NM_177326    | 3.25E-05    | 1.41088 | 1.41088 |
| Hebp2         | NM_019487    | 0.000304906 | 1.41074 | 1.41074 |
| 6330578E17Rik | NM_198006    | 1.73E-05    | 1.41026 | 1.41026 |
| Akr7a5        | NM_025337    | 7.47E-05    | 1.40997 | 1.40997 |
| Atp13a1       | NM_133224    | 1.53E-05    | 1.40938 | 1.40938 |
| Cldn6         | NM_018777    | 0.000149485 | 1.40925 | 1.40925 |
| Scnn1b        | NM_011325    | 0.000448963 | 1.40821 | 1.40821 |
| Hexdc         | NM_001146073 | 0.000218445 | 1.40777 | 1.40777 |
| Rffl          | NM_001164570 | 0.000341794 | 1.40772 | 1.40772 |
| Fsip1         | NM_027759    | 2.47E-05    | 1.40727 | 1.40727 |
| Greb1         | NM_015764    | 5.91E-05    | 1.40701 | 1.40701 |
| Rgs9          | NM_011268    | 0.000180921 | 1.40679 | 1.40679 |
| Tmem38a       | NM_144534    | 5.25E-06    | 1.40658 | 1.40658 |
| Ap3s2         | NM_009682    | 8.54E-05    | 1.40649 | 1.40649 |
| Cdkl1         | NM_183294    | 2.49E-06    | 1.40647 | 1.40647 |
| Smurf1        | NM_001038627 | 0.000155059 | 1.40494 | 1.40494 |
| Tyrp1         | NM_031202    | 4.31E-05    | 1.404   | 1.404   |
| Prss50        | NM_146227    | 0.000319462 | 1.40384 | 1.40384 |
| Rfng          | NM_009053    | 0.00063725  | 1.40366 | 1.40366 |
| Sel1l         | NM_001039089 | 2.50E-05    | 1.40332 | 1.40332 |
| Cul4a         | NM_146207    | 5.05E-05    | 1.40328 | 1.40328 |
| Ntng2         | NM_133501    | 0.000238404 | 1.40226 | 1.40226 |
| Nhs           | NM_001081052 | 6.19E-05    | 1.40177 | 1.40177 |
| Smg6          | NM_001002764 | 2.11E-05    | 1.40057 | 1.40057 |
| Inpp5f        | NM_178641    | 1.57E-07    | 1.40041 | 1.40041 |
| 9930013L23Rik | NM_030728    | 4.15E-05    | 1.40005 | 1.40005 |
| Gm1027        | NM_001126487 | 9.10E-06    | 1.39993 | 1.39993 |
| Man1a2        | NM_010763    | 0.000239799 | 1.39959 | 1.39959 |
| Gpnmb         | NM_053110    | 0.00017111  | 1.39894 | 1.39894 |
| Ltbr          | NM_010736    | 0.000437675 | 1.39878 | 1.39878 |
| Espn          | NM_207687    | 2.71E-05    | 1.39878 | 1.39878 |
| Alkbh3        | NM_026944    | 0.000753963 | 1.39807 | 1.39807 |

|               |              |             |         |         |
|---------------|--------------|-------------|---------|---------|
| Trim66        | NM_001170912 | 3.76E-06    | 1.39712 | 1.39712 |
| E130309D14Rik | BC150886     | 0.000144272 | 1.39607 | 1.39607 |
| Adck2         | NM_178873    | 0.000674203 | 1.39556 | 1.39556 |
| Card14        | NM_130886    | 1.44E-05    | 1.3954  | 1.3954  |
| Cd177         | NM_026862    | 4.75E-07    | 1.39528 | 1.39528 |
| Fry           | NM_172887    | 2.25E-05    | 1.39487 | 1.39487 |
| Ankrd46       | NM_175134    | 0.000470479 | 1.39486 | 1.39486 |
| Spats2l       | NM_144882    | 9.07E-05    | 1.39424 | 1.39424 |
| Cep110        | NM_012018    | 0.000113484 | 1.39404 | 1.39404 |
| Kcnd1         | NM_008423    | 7.81E-05    | 1.39374 | 1.39374 |
| Sik3          | NM_027498    | 6.27E-05    | 1.39345 | 1.39345 |
| 6030458C11Rik | NM_029998    | 0.000914024 | 1.39218 | 1.39218 |
| Polr2a        | NM_009089    | 3.67E-05    | 1.38946 | 1.38946 |
| Slc5a2        | NM_133254    | 5.79E-06    | 1.38936 | 1.38936 |
| Scrib         | NM_134089    | 7.08E-07    | 1.38884 | 1.38884 |
| Fbn1          | NM_007993    | 0.000108293 | 1.38859 | 1.38859 |
| Wls           | NM_026582    | 0.000144542 | 1.38721 | 1.38721 |
| 2310046O06Rik | NM_001166364 | 0.000809096 | 1.38685 | 1.38685 |
| Mup7          | NM_001134675 | 6.74E-06    | 1.38662 | 1.38662 |
| Slc39a4       | NM_028064    | 0.000391126 | 1.38654 | 1.38654 |
| Inpp1         | NM_010567    | 0.000503182 | 1.38539 | 1.38539 |
| Fam3b         | NM_020622    | 0.000545401 | 1.3842  | 1.3842  |
| Ttc7b         | NM_001033213 | 0.000518354 | 1.38362 | 1.38362 |
| Cln6          | NM_001033175 | 8.94E-06    | 1.38353 | 1.38353 |
| Araf          | NM_009703    | 0.000168675 | 1.3834  | 1.3834  |
| Ppfibp2       | NM_008905    | 4.41E-05    | 1.38336 | 1.38336 |
| Ppp2r5a       | NM_144880    | 0.000138373 | 1.38328 | 1.38328 |
| Tmem63a       | NM_144794    | 6.05E-05    | 1.3831  | 1.3831  |
| Shroom3       | NM_015756    | 9.83E-06    | 1.383   | 1.383   |
| Krt36         | NM_001174099 | 3.09E-05    | 1.38247 | 1.38247 |
| Arc           | NM_018790    | 8.63E-05    | 1.38233 | 1.38233 |
| Map3k15       | NM_001163085 | 7.32E-07    | 1.38231 | 1.38231 |
| Man1c1        | NM_207237    | 0.000169737 | 1.38199 | 1.38199 |
| Dmwd          | NM_010058    | 1.84E-05    | 1.38141 | 1.38141 |
| Smarcc2       | NM_001114097 | 1.54E-05    | 1.38063 | 1.38063 |
| Cd274         | NM_021893    | 0.000134518 | 1.37877 | 1.37877 |
| Ints1         | NM_026748    | 0.000103682 | 1.37693 | 1.37693 |
| Abcc9         | NM_021041    | 1.28E-05    | 1.37563 | 1.37563 |
| Arg2          | NM_009705    | 0.000353569 | 1.37544 | 1.37544 |
| Extl1         | NM_019578    | 3.48E-05    | 1.37514 | 1.37514 |
| Spag16        | NM_029160    | 3.54E-05    | 1.37412 | 1.37412 |
| Rasal3        | NM_178785    | 3.67E-06    | 1.37358 | 1.37358 |
| Ccdc113       | NM_172914    | 9.45E-05    | 1.37325 | 1.37325 |

|               |                    |             |         |         |
|---------------|--------------------|-------------|---------|---------|
| Cxx1a         | NM_024170          | 0.000215594 | 1.37303 | 1.37303 |
| BC049715      | NM_178776          | 0.000325674 | 1.37253 | 1.37253 |
| 2310028H24Rik | NM_001159583       | 0.000101048 | 1.37204 | 1.37204 |
| Odf2          | NM_001113213       | 0.000167855 | 1.37185 | 1.37185 |
| Dlec1         | NM_177117          | 0.000109042 | 1.37013 | 1.37013 |
| Atp6v0e2      | NM_133764          | 0.000101086 | 1.37002 | 1.37002 |
| Kif1a         | NM_008440          | 1.85E-05    | 1.36956 | 1.36956 |
| A630001O12Rik | ENSMUST00000098306 | 0.000383911 | 1.3692  | 1.3692  |
| Fam161a       | NM_028672          | 5.65E-05    | 1.36892 | 1.36892 |
| Recql4        | NM_058214          | 3.32E-06    | 1.36881 | 1.36881 |
| Prodh2        | NM_019546          | 0.000169426 | 1.36881 | 1.36881 |
| Evl           | NM_001163394       | 4.40E-06    | 1.36802 | 1.36802 |
| Pycard        | NM_023258          | 0.000462563 | 1.36787 | 1.36787 |
| Cd40          | NR_027852          | 0.000977086 | 1.36737 | 1.36737 |
| Ccdc97        | NM_028771          | 3.89E-06    | 1.36666 | 1.36666 |
| 4932425I24Rik | NM_001081025       | 4.32E-06    | 1.36656 | 1.36656 |
| Dennd2a       | NM_172477          | 1.10E-05    | 1.36605 | 1.36605 |
| Epb4.1I3      | NM_013813          | 3.06E-05    | 1.3655  | 1.3655  |
| Npas3         | NM_013780          | 1.49E-06    | 1.36469 | 1.36469 |
| Pmepa1        | NM_022995          | 1.40E-05    | 1.36441 | 1.36441 |
| Phf3          | NM_001081080       | 0.000698814 | 1.36312 | 1.36312 |
| Rfx4          | NM_001024918       | 1.11E-05    | 1.36274 | 1.36274 |
| Fzd6          | NM_008056          | 9.61E-08    | 1.36191 | 1.36191 |
| Nfix          | NM_001081981       | 0.000396146 | 1.36172 | 1.36172 |
| Cpeb2         | NM_175937          | 1.51E-05    | 1.36027 | 1.36027 |
| Dck           | NM_007832          | 0.00013571  | 1.35907 | 1.35907 |
| Mb            | NM_013593          | 0.000402536 | 1.35858 | 1.35858 |
| Pkdcc         | NM_134117          | 0.000411256 | 1.35841 | 1.35841 |
| C330006K01Rik | NM_172725          | 3.53E-05    | 1.35798 | 1.35798 |
| Col16a1       | NM_028266          | 0.000122546 | 1.35767 | 1.35767 |
| Iqgap1        | NM_016721          | 3.13E-05    | 1.35696 | 1.35696 |
| Papola        | NM_011112          | 4.04E-08    | 1.35674 | 1.35674 |
| Gsn           | NM_146120          | 1.13E-05    | 1.35655 | 1.35655 |
| Vps33a        | NM_029929          | 1.65E-06    | 1.35564 | 1.35564 |
| Al428936      | NM_153577          | 1.36E-05    | 1.35443 | 1.35443 |
| Rab11a        | NM_017382          | 0.000469715 | 1.35429 | 1.35429 |
| Ttc16         | NM_177384          | 1.13E-06    | 1.35416 | 1.35416 |
| Sos2          | NM_001135559       | 0.000811624 | 1.3526  | 1.3526  |
| Stard9        | ENSMUST00000099504 | 0.000145465 | 1.35165 | 1.35165 |
| Fam20a        | NM_153782          | 6.35E-05    | 1.35087 | 1.35087 |
| Ccdc55        | NM_001012309       | 0.00051357  | 1.35075 | 1.35075 |
| Nkx3-1        | NM_010921          | 2.38E-05    | 1.34848 | 1.34848 |
| Ythdc1        | NM_177680          | 1.09E-05    | 1.34782 | 1.34782 |

|               |                    |             |         |         |
|---------------|--------------------|-------------|---------|---------|
| Ralgsps1      | NM_175211          | 1.07E-06    | 1.34767 | 1.34767 |
| Dnajb1        | NM_018808          | 0.000522589 | 1.34734 | 1.34734 |
| Hdac6         | NM_010413          | 3.68E-05    | 1.34654 | 1.34654 |
| Utrn          | NM_011682          | 0.00017264  | 1.34606 | 1.34606 |
| Ctr9          | NM_009431          | 5.96E-05    | 1.3457  | 1.3457  |
| Kif3b         | NM_008444          | 7.28E-05    | 1.34433 | 1.34433 |
| Gm505         | BC158088           | 5.42E-06    | 1.34385 | 1.34385 |
| 1700028K03Rik | NM_182745          | 0.000533987 | 1.34318 | 1.34318 |
| Nefh          | NM_010904          | 0.000456254 | 1.34262 | 1.34262 |
| Fgfr1         | NM_010206          | 1.22E-06    | 1.34212 | 1.34212 |
| Acan          | NM_007424          | 9.27E-08    | 1.34183 | 1.34183 |
| Tsnax         | NM_016909          | 0.000523966 | 1.3417  | 1.3417  |
| Myh11         | NM_013607          | 1.44E-05    | 1.34139 | 1.34139 |
| Prrx2         | NM_009116          | 0.000153282 | 1.34126 | 1.34126 |
| Tanc1         | NM_198294          | 2.40E-05    | 1.34117 | 1.34117 |
| Lrsam1        | NM_199302          | 0.000908253 | 1.33935 | 1.33935 |
| Atxn1         | NM_009124          | 0.000108132 | 1.33818 | 1.33818 |
| Mcl1          | NM_008562          | 5.33E-07    | 1.3372  | 1.3372  |
| Fam81a        | BC025646           | 2.88E-05    | 1.33638 | 1.33638 |
| Tbc1d9b       | NM_029745          | 0.000292937 | 1.33581 | 1.33581 |
| 1110012D08Rik | ENSMUST00000051011 | 0.000472925 | 1.33468 | 1.33468 |
| AU040320      | NM_001035526       | 0.000843594 | 1.33389 | 1.33389 |
| Grik5         | NM_008168          | 4.59E-05    | 1.33285 | 1.33285 |
| Gfra4         | NM_020014          | 0.000317708 | 1.33285 | 1.33285 |
| Rusc2         | NM_001037709       | 0.000201361 | 1.33282 | 1.33282 |
| Ccdc150       | NM_030025          | 1.05E-05    | 1.33208 | 1.33208 |
| 5133401N09Rik | NM_198004          | 8.31E-05    | 1.33126 | 1.33126 |
| Mink1         | NM_001045959       | 3.33E-05    | 1.33093 | 1.33093 |
| Tcfcp2        | NM_033476          | 0.000266602 | 1.33047 | 1.33047 |
| Rnmtl1        | NM_183263          | 0.000612273 | 1.33034 | 1.33034 |
| Nsun3         | NM_178925          | 0.000945948 | 1.32873 | 1.32873 |
| 2310021P13Rik | BC151046           | 3.94E-05    | 1.32807 | 1.32807 |
| Abca2         | NM_007379          | 1.35E-05    | 1.32785 | 1.32785 |
|               | 5-九月 NM_213614     | 0.000825302 | 1.3273  | 1.3273  |
| Chit1         | NM_027979          | 1.43E-05    | 1.32715 | 1.32715 |
| Adck5         | NM_172960          | 0.000132366 | 1.32502 | 1.32502 |
| Abi1          | NM_001077190       | 2.69E-05    | 1.3249  | 1.3249  |
| Wscd2         | NM_177292          | 0.000300871 | 1.32443 | 1.32443 |
| Gbp3          | NM_018734          | 0.000904916 | 1.32441 | 1.32441 |
| Fam101b       | NM_029658          | 0.000656371 | 1.32397 | 1.32397 |
| Mlf2          | NM_145385          | 0.000411954 | 1.32376 | 1.32376 |
| Mbd6          | NM_033072          | 0.00041064  | 1.32289 | 1.32289 |
| Cars          | NM_013742          | 0.000104134 | 1.32273 | 1.32273 |



|               |              |             |         |         |
|---------------|--------------|-------------|---------|---------|
| Hs1bp3        | NM_021429    | 8.87E-05    | 1.32106 | 1.32106 |
| Pkn1          | NM_177262    | 1.49E-06    | 1.321   | 1.321   |
| Kalrn         | NM_177357    | 8.41E-05    | 1.32054 | 1.32054 |
| Herpud2       | NM_020586    | 0.000238788 | 1.32017 | 1.32017 |
| Cpeb4         | NM_026252    | 0.000136676 | 1.31951 | 1.31951 |
| Cngb1         | BC045114     | 2.54E-05    | 1.31935 | 1.31935 |
| Stard13       | NM_001163493 | 0.000461578 | 1.31894 | 1.31894 |
| Osmr          | NM_011019    | 0.000132477 | 1.31826 | 1.31826 |
| Hdgfl1        | NM_008232    | 0.000386052 | 1.31806 | 1.31806 |
| Dnttip1       | NM_133763    | 7.55E-05    | 1.31792 | 1.31792 |
| Dffa          | NM_001025296 | 5.77E-06    | 1.3177  | 1.3177  |
| Gm10324       | NM_001177832 | 2.22E-05    | 1.31753 | 1.31753 |
| Epb4.1I5      | NM_145506    | 0.000318382 | 1.31678 | 1.31678 |
| Chga          | NM_007693    | 0.000733486 | 1.31647 | 1.31647 |
| Phf2          | NM_011078    | 2.05E-05    | 1.31575 | 1.31575 |
| Tex2          | NM_198292    | 0.000103539 | 1.31536 | 1.31536 |
| Spock2        | NM_052994    | 6.80E-05    | 1.31458 | 1.31458 |
| Slc39a14      | NM_001135151 | 0.000387316 | 1.31334 | 1.31334 |
| Ptdss2        | NM_013782    | 0.000588642 | 1.31261 | 1.31261 |
| Tgfbr2        | NM_009371    | 9.32E-05    | 1.31213 | 1.31213 |
| Ass1          | NM_007494    | 0.000566911 | 1.31069 | 1.31069 |
| N4bp1         | NM_030563    | 1.83E-06    | 1.31028 | 1.31028 |
| Plcd3         | NM_152813    | 0.000990896 | 1.30846 | 1.30846 |
| 2310003H01Rik | NM_027980    | 0.000251105 | 1.30636 | 1.30636 |
| Zfp324        | NM_178732    | 0.000254104 | 1.30615 | 1.30615 |
| Rela          | NM_009045    | 0.000516211 | 1.30599 | 1.30599 |
| Fuk           | NM_172283    | 0.000218473 | 1.30463 | 1.30463 |
| Hemk1         | NM_133984    | 5.51E-06    | 1.30419 | 1.30419 |
| Sel1I3        | NM_172710    | 8.84E-05    | 1.303   | 1.303   |
| Psap          | NM_001146120 | 1.31E-05    | 1.30267 | 1.30267 |
| Tmem110       | NM_028839    | 0.000411714 | 1.30219 | 1.30219 |
| Gm6310        | XM_886739    | 0.000436033 | 1.30205 | 1.30205 |
| Ccdc117       | NM_134033    | 6.45E-05    | 1.30119 | 1.30119 |
| Nmral1        | NM_026393    | 0.00038574  | 1.29943 | 1.29943 |
| Zmynd8        | NM_027230    | 0.000482747 | 1.29935 | 1.29935 |
| Cyp4f40       | NM_001101588 | 0.000237797 | 1.29803 | 1.29803 |
| Rbm9          | NM_053104    | 2.97E-05    | 1.29739 | 1.29739 |
| Zfp839        | NM_028365    | 4.29E-05    | 1.29734 | 1.29734 |
| Fbxo41        | NM_001001160 | 0.000988582 | 1.29704 | 1.29704 |
| Cabyr         | NM_027687    | 0.000119645 | 1.29654 | 1.29654 |
| Ttc19         | NM_028360    | 0.000667055 | 1.29626 | 1.29626 |
| Lamb1-1       | NM_008482    | 8.91E-05    | 1.29442 | 1.29442 |
| Col5a1        | NM_015734    | 5.48E-05    | 1.29432 | 1.29432 |

|               |              |             |         |         |
|---------------|--------------|-------------|---------|---------|
| Gba2          | NM_172692    | 0.000685287 | 1.29412 | 1.29412 |
| Smap2         | NM_133716    | 0.000271307 | 1.2937  | 1.2937  |
| Ube2i         | NM_011665    | 3.10E-05    | 1.29263 | 1.29263 |
| Nbas          | NM_027706    | 0.000447375 | 1.29237 | 1.29237 |
| B230208H17Rik | NM_001024616 | 0.000795449 | 1.29038 | 1.29038 |
| Ncf2          | NM_010877    | 0.000725737 | 1.28897 | 1.28897 |
| Sfrs8         | NM_172276    | 1.62E-05    | 1.28778 | 1.28778 |
| Lars2         | NM_153168    | 0.000528568 | 1.28756 | 1.28756 |
| Ttll12        | NM_183017    | 0.000812334 | 1.28662 | 1.28662 |
| Adrbk2        | NM_177078    | 0.000148581 | 1.28619 | 1.28619 |
| Samd8         | NM_026283    | 0.000135066 | 1.28525 | 1.28525 |
| Farp1         | NM_134082    | 0.000534019 | 1.28369 | 1.28369 |
| Mapkap1       | NM_177345    | 0.000435979 | 1.28332 | 1.28332 |
| Rnf126        | NM_144528    | 0.000204315 | 1.28316 | 1.28316 |
| BC060267      | BC060267     | 9.37E-05    | 1.28313 | 1.28313 |
| Tex261        | NM_009357    | 0.000263728 | 1.28224 | 1.28224 |
| Polr3d        | NM_025945    | 8.51E-05    | 1.28189 | 1.28189 |
| Slc24a6       | NM_133221    | 0.000531978 | 1.28099 | 1.28099 |
| Canx          | NM_007597    | 0.000385359 | 1.2801  | 1.2801  |
| Zc3h6         | NM_178404    | 0.000430728 | 1.27973 | 1.27973 |
| 1300001I01Rik | BC072573     | 0.000330774 | 1.27912 | 1.27912 |
| Adam22        | NM_001007220 | 0.000930572 | 1.27864 | 1.27864 |
| Xpnpep2       | NM_133213    | 0.000326254 | 1.27849 | 1.27849 |
| Dmkn          | NM_001166173 | 4.91E-06    | 1.2784  | 1.2784  |
| Ap3m2         | NM_001122820 | 0.000148857 | 1.27683 | 1.27683 |
| Pigq          | NM_011822    | 4.54E-05    | 1.27648 | 1.27648 |
| Csrp1         | NM_007791    | 5.77E-05    | 1.27643 | 1.27643 |
| Cdkl3         | NM_153785    | 0.000899249 | 1.27635 | 1.27635 |
| Slitrk5       | NM_198865    | 0.000704539 | 1.27613 | 1.27613 |
| Mta1          | NM_054081    | 6.28E-05    | 1.27564 | 1.27564 |
| 2010015L04Rik | NM_177674    | 3.30E-05    | 1.27536 | 1.27536 |
| Phf7          | NM_027949    | 0.000520447 | 1.27516 | 1.27516 |
| Xpc           | NM_009531    | 6.16E-05    | 1.27439 | 1.27439 |
| Dstn          | NM_019771    | 2.96E-05    | 1.27436 | 1.27436 |
| Stat5a        | NM_011488    | 0.000180039 | 1.27423 | 1.27423 |
| Rcbtb1        | NM_027764    | 0.000461433 | 1.27384 | 1.27384 |
| Szt2          | NM_198170    | 0.000135325 | 1.27291 | 1.27291 |
| Phldb1        | NM_153537    | 9.44E-07    | 1.26994 | 1.26994 |
| Stab1         | NM_138672    | 0.000719335 | 1.26978 | 1.26978 |
| Rltpr         | NM_001033320 | 0.000652673 | 1.26911 | 1.26911 |
| Slc2a7        | NM_001085529 | 0.000246543 | 1.2685  | 1.2685  |
| Ccdc67        | NM_181816    | 0.00013004  | 1.26815 | 1.26815 |
| Pamr1         | NM_173749    | 7.59E-05    | 1.2676  | 1.2676  |

|               |                    |             |         |         |
|---------------|--------------------|-------------|---------|---------|
| Anapc16       | NM_025514          | 0.000888045 | 1.26672 | 1.26672 |
| Vps24         | NM_025783          | 0.000174299 | 1.26661 | 1.26661 |
| Adcy3         | NM_001159537       | 0.000130385 | 1.26631 | 1.26631 |
| Gm16515       | NM_025294          | 0.000572534 | 1.26566 | 1.26566 |
| Stat5b        | NM_001113563       | 5.62E-05    | 1.26469 | 1.26469 |
| E030019B06Rik | BC116882           | 9.52E-05    | 1.26356 | 1.26356 |
| Galnt9        | NM_198306          | 0.000229155 | 1.26307 | 1.26307 |
| Dctn4         | NM_026302          | 0.000996875 | 1.26001 | 1.26001 |
| Trrap         | NM_001081362       | 0.000371787 | 1.25977 | 1.25977 |
| Plxna3        | NM_008883          | 1.38E-05    | 1.25938 | 1.25938 |
| Aprt          | NM_009698          | 3.73E-05    | 1.25927 | 1.25927 |
| Grina         | NM_023168          | 4.66E-06    | 1.25846 | 1.25846 |
| Tm7sf3        | NM_026281          | 0.000973247 | 1.25766 | 1.25766 |
| Tsc2          | NM_011647          | 7.76E-06    | 1.25652 | 1.25652 |
| Sorbs1        | NM_178362          | 0.000391334 | 1.25544 | 1.25544 |
| Spn           | NM_009259          | 5.48E-05    | 1.25537 | 1.25537 |
| Nlk           | NM_008702          | 0.000618031 | 1.25511 | 1.25511 |
| Pclo          | NM_011995          | 4.25E-06    | 1.25467 | 1.25467 |
| Mical2        | NM_177282          | 0.00014967  | 1.25219 | 1.25219 |
| BC037034      | NM_153161          | 0.000567548 | 1.25127 | 1.25127 |
| Dci           | NM_010023          | 0.000111566 | 1.24991 | 1.24991 |
| Gtf2ird2      | NM_053266          | 0.000122551 | 1.24858 | 1.24858 |
| Zfp536        | NM_172385          | 5.39E-05    | 1.24823 | 1.24823 |
| Sgsh          | NM_018822          | 9.26E-05    | 1.24725 | 1.24725 |
| Peli2         | NM_033602          | 0.000459638 | 1.24464 | 1.24464 |
| 6720456H20Rik | NM_172600          | 0.000853688 | 1.24416 | 1.24416 |
| Anub1         | NM_001081317       | 0.000240538 | 1.24193 | 1.24193 |
| 5830477G23Rik | ENSMUST00000115745 | 0.00022399  | 1.24112 | 1.24112 |
| Apc           | NM_007462          | 0.00063224  | 1.24057 | 1.24057 |
| Spns2         | NM_153060          | 0.00060681  | 1.23992 | 1.23992 |
| Ano2          | NM_153589          | 0.000991773 | 1.23961 | 1.23961 |
| Sorbs3        | NM_011366          | 0.000275763 | 1.23738 | 1.23738 |
| E2f1          | NM_007891          | 0.00039192  | 1.23659 | 1.23659 |
| Fam168b       | NM_001160235       | 0.000159675 | 1.23437 | 1.23437 |
| Smad1         | NM_008539          | 0.000165979 | 1.23361 | 1.23361 |
| Prrc1         | NM_028447          | 2.73E-05    | 1.23246 | 1.23246 |
| Ptp4a1        | NM_011200          | 0.000308255 | 1.2323  | 1.2323  |
| Samd5         | NM_177271          | 0.00047895  | 1.2321  | 1.2321  |
| Lhpp          | NM_029609          | 0.000783225 | 1.22779 | 1.22779 |
| Pof1b         | NM_181579          | 0.000174191 | 1.22401 | 1.22401 |
| Gm600         | ENSMUST00000079469 | 0.000337682 | 1.2239  | 1.2239  |
| Acp1          | NM_001110239       | 0.000419134 | 1.223   | 1.223   |
| Grip1         | NM_028736          | 0.000236534 | 1.22026 | 1.22026 |

|               |                    |             |          |          |
|---------------|--------------------|-------------|----------|----------|
| Dhx16         | NM_026987          | 0.000124809 | 1.2183   | 1.2183   |
| Mkl2          | NM_153588          | 4.45E-05    | 1.21799  | 1.21799  |
| Ppp1r14b      | NM_008889          | 0.000149704 | 1.21749  | 1.21749  |
| Abtb2         | NM_178890          | 0.000559553 | 1.21716  | 1.21716  |
| Znf512b       | NM_001164597       | 2.93E-05    | 1.21564  | 1.21564  |
| Acox1         | NM_015729          | 3.15E-05    | 1.21317  | 1.21317  |
| Gcap14        | NM_027045          | 5.06E-05    | 1.21171  | 1.21171  |
| Dot1l         | NM_199322          | 0.000934305 | 1.21162  | 1.21162  |
| A330021E22Rik | BC062906           | 0.000217813 | 1.20846  | 1.20846  |
| Ddx1          | NM_134040          | 0.000836982 | 1.20722  | 1.20722  |
| Adamts17      | NM_001033877       | 0.000491024 | 1.20429  | 1.20429  |
| Zdhhc4        | NM_028379          | 6.50E-05    | 1.20374  | 1.20374  |
| Pcbd2         | NM_028281          | 5.07E-05    | 1.20308  | 1.20308  |
| Trim37        | NM_197987          | 0.000460017 | 1.20002  | 1.20002  |
| Usp19         | NM_027804          | 0.000802393 | 1.19937  | 1.19937  |
| Lzts2         | NM_145503          | 0.00084693  | 1.19832  | 1.19832  |
| Srcin1        | NM_018873          | 0.000561505 | 1.19748  | 1.19748  |
| Srgap1        | NM_001081037       | 0.000989974 | 1.19597  | 1.19597  |
| Accn1         | NM_001034013       | 0.000584797 | 1.19486  | 1.19486  |
| Bud13         | NM_146000          | 4.19E-06    | 1.19386  | 1.19386  |
| Rogdi         | NM_133185          | 0.000177677 | 1.19348  | 1.19348  |
| Dcaf7         | NM_027946          | 0.000549549 | 1.19229  | 1.19229  |
| Arhgef5       | NM_133674          | 0.000270051 | 1.18988  | 1.18988  |
| Gabpb1        | NM_207669          | 0.000985258 | 1.18928  | 1.18928  |
| Grn           | NM_008175          | 0.000225687 | 1.18684  | 1.18684  |
| Pde4b         | NM_019840          | 0.000827908 | 1.18522  | 1.18522  |
| Pacsin2       | NM_011862          | 0.000513952 | 1.18516  | 1.18516  |
| Grhl1         | NM_001161406       | 0.000110786 | 1.18454  | 1.18454  |
| Zc3h4         | NM_198631          | 0.000111555 | 1.18129  | 1.18129  |
| Acat2         | NM_009338          | 0.000455514 | 1.17029  | 1.17029  |
| Arhgef7       | NM_001113518       | 0.000521826 | 1.1701   | 1.1701   |
| Cnksr3        | NM_172546          | 0.000270641 | 1.164    | 1.164    |
| Tube1         | NM_028006          | 0.000177197 | 1.15132  | 1.15132  |
| Msh4          | NM_031870          | 0.000273731 | 1.14554  | 1.14554  |
| D18Ert653e    | BC096371           | 0.000683587 | 1.14421  | 1.14421  |
| Ppp1r10       | NM_001163818       | 0.000172909 | 1.08631  | 1.08631  |
| Gm9928        | ENSMUST00000066625 | 0.000672546 | 0.925159 | -1.0809  |
| Actg1         | NM_009609          | 0.000999215 | 0.903449 | -1.10687 |
| Slc25a5       | NM_007451          | 0.000605208 | 0.892365 | -1.12062 |
| Cct2          | NM_007636          | 3.79E-05    | 0.890482 | -1.12299 |
| Msl1          | NM_028722          | 0.000371497 | 0.889401 | -1.12435 |
| Rfwd3         | NM_146218          | 0.000552864 | 0.879723 | -1.13672 |
| Grinl1a       | NM_178602          | 0.000608386 | 0.879131 | -1.13749 |

|               |                    |             |          |          |
|---------------|--------------------|-------------|----------|----------|
| 1500035H01Rik | NM_023831          | 0.000735179 | 0.877966 | -1.139   |
| Stub1         | NM_019719          | 0.000204922 | 0.870391 | -1.14891 |
| Zfp7          | NM_145916          | 0.00083167  | 0.868977 | -1.15078 |
| Add3          | NM_001164099       | 0.000757646 | 0.868108 | -1.15193 |
| Cul5          | NM_027807          | 0.000555821 | 0.866352 | -1.15426 |
| Atp6v0c       | NM_009729          | 0.000175922 | 0.865353 | -1.1556  |
| Arl4a         | NM_001039515       | 0.000727449 | 0.863778 | -1.1577  |
| Plagl2        | NM_018807          | 0.000490679 | 0.862197 | -1.15983 |
| Gm9902        | ENSMUST00000065610 | 0.000967589 | 0.859803 | -1.16306 |
| Ppwd1         | NM_172807          | 0.000384582 | 0.859607 | -1.16332 |
| Hdac1         | NM_008228          | 5.22E-05    | 0.859581 | -1.16336 |
| Aifm2         | NM_001039194       | 0.000890825 | 0.859325 | -1.1637  |
| Fyn           | NM_001122893       | 0.000660819 | 0.856974 | -1.1669  |
| LOC100047053  | ENSMUST00000103377 | 0.000680965 | 0.856236 | -1.1679  |
| Sipa1l2       | NM_001081337       | 8.90E-05    | 0.85553  | -1.16887 |
| Lrp10         | NM_022993          | 0.000366791 | 0.853297 | -1.17192 |
| Hipk1         | NM_010432          | 0.000153036 | 0.852819 | -1.17258 |
| Nub1          | NM_016736          | 0.000768215 | 0.851398 | -1.17454 |
| Psmc6         | NM_025550          | 0.000944571 | 0.851063 | -1.175   |
| Set           | NM_023871          | 0.000265073 | 0.847667 | -1.17971 |
| H2-Ke6        | NM_013543          | 0.000329136 | 0.847452 | -1.18001 |
| Xylt1         | NM_175645          | 6.98E-05    | 0.845878 | -1.1822  |
| Rnf20         | NM_001163263       | 5.40E-05    | 0.844764 | -1.18376 |
| Xpot          | NM_001081056       | 0.000769798 | 0.844587 | -1.18401 |
| Cyc1          | NM_025567          | 0.000960857 | 0.840563 | -1.18968 |
| Adnp          | NM_009628          | 8.67E-05    | 0.840438 | -1.18986 |
| Hsp90b1       | NM_011631          | 0.000264101 | 0.840434 | -1.18986 |
| Ide           | NM_031156          | 0.000609521 | 0.840198 | -1.1902  |
| Ppp2r3a       | NM_001161362       | 0.000196019 | 0.839686 | -1.19092 |
| Timm50        | NM_025616          | 0.000378627 | 0.839127 | -1.19171 |
| Pttg1         | NM_013917          | 0.000231907 | 0.838007 | -1.19331 |
| Nf2           | NM_010898          | 6.91E-05    | 0.837497 | -1.19403 |
| Ywhag         | NM_018871          | 0.000667123 | 0.837226 | -1.19442 |
| Cds2          | NM_138651          | 0.00031172  | 0.837157 | -1.19452 |
| Helb          | NM_080446          | 0.00033682  | 0.836912 | -1.19487 |
| Cbfa2t2       | NM_172860          | 0.00022751  | 0.835413 | -1.19701 |
| 1600021P15Rik | NM_177718          | 0.00046881  | 0.835091 | -1.19747 |
| Igsf1         | NM_177591          | 0.000888542 | 0.833779 | -1.19936 |
| Mapk1         | NM_011949          | 8.33E-05    | 0.833525 | -1.19972 |
| Dhx15         | NM_007839          | 0.000458347 | 0.832397 | -1.20135 |
| Unc45a        | NM_133952          | 0.00085398  | 0.831981 | -1.20195 |
| Kdm4a         | NM_001161823       | 0.000936086 | 0.831053 | -1.20329 |
| Tmem183a      | NM_020588          | 0.000846079 | 0.830584 | -1.20397 |

|               |              |             |          |          |
|---------------|--------------|-------------|----------|----------|
| Ncoa4         | NM_001033988 | 0.000331263 | 0.830242 | -1.20447 |
| Ng23          | NM_023893    | 0.000135705 | 0.829865 | -1.20502 |
| Gm4157        | XR_034250    | 0.000515531 | 0.829859 | -1.20502 |
| Tmem30b       | NM_178715    | 0.00050539  | 0.829112 | -1.20611 |
| Thrap3        | NM_146153    | 3.89E-05    | 0.828719 | -1.20668 |
| Baz2a         | NM_054078    | 0.000787115 | 0.828622 | -1.20682 |
| Polg          | NM_017462    | 0.000630946 | 0.827219 | -1.20887 |
| Golph3        | NM_025673    | 0.000244261 | 0.825704 | -1.21109 |
| Mir543        | NR_030261    | 0.000127804 | 0.825278 | -1.21171 |
| Ubxn2a        | NM_145441    | 0.000540164 | 0.825123 | -1.21194 |
| Scyl1         | NM_023912    | 6.46E-05    | 0.824443 | -1.21294 |
| Rims2         | NM_053271    | 0.000970365 | 0.823634 | -1.21413 |
| Chrna7        | NM_007390    | 0.000414246 | 0.823354 | -1.21454 |
| 1600027N09Rik | NM_028479    | 0.000617153 | 0.823301 | -1.21462 |
| Psm4          | NM_008951    | 6.73E-05    | 0.822648 | -1.21559 |
| Hectd2        | NM_001163471 | 0.000928217 | 0.822626 | -1.21562 |
| Kbtbd2        | NM_145958    | 7.49E-05    | 0.82246  | -1.21587 |
| Ncl           | NM_010880    | 0.000120334 | 0.821111 | -1.21786 |
| Plekha8       | NM_001164361 | 0.000334132 | 0.820145 | -1.2193  |
| Ncaph2        | NM_001115132 | 3.84E-05    | 0.819864 | -1.21971 |
| Glg1          | NM_009149    | 0.000204795 | 0.81974  | -1.2199  |
| Tuba1c        | NM_009448    | 6.55E-05    | 0.81947  | -1.2203  |
| Ube2z         | NM_172300    | 0.000178595 | 0.818644 | -1.22153 |
| Olf825        | NM_146677    | 0.000637703 | 0.81774  | -1.22288 |
| Dock6         | NM_177030    | 0.000140848 | 0.817735 | -1.22289 |
| Tufm          | NM_172745    | 5.41E-05    | 0.817651 | -1.22302 |
| Birc6         | NM_007566    | 0.000729305 | 0.817584 | -1.22312 |
| Dcakd         | NM_026551    | 0.000294306 | 0.817529 | -1.2232  |
| Clk2          | NM_007712    | 0.000407188 | 0.816584 | -1.22461 |
| Samd4b        | NM_175021    | 9.63E-05    | 0.815343 | -1.22648 |
| Hspa5         | NM_022310    | 3.63E-05    | 0.815117 | -1.22682 |
| Capza2        | NM_007604    | 1.69E-06    | 0.814778 | -1.22733 |
| Fastkd5       | NM_198176    | 0.000161907 | 0.814104 | -1.22834 |
| Ccdc136       | NM_145574    | 0.000375518 | 0.814067 | -1.2284  |
| Mir669a-2     | NR_030470    | 0.000317804 | 0.813676 | -1.22899 |
| Itgb7         | NM_013566    | 0.000566547 | 0.813524 | -1.22922 |
| Rex2          | NM_009051    | 8.58E-05    | 0.813303 | -1.22955 |
| Cfl2          | NM_007688    | 0.000100647 | 0.81295  | -1.23009 |
| Hnrnp1        | NM_177301    | 8.78E-05    | 0.812049 | -1.23145 |
| Mapk8ip1      | NM_011162    | 0.000134282 | 0.811852 | -1.23175 |
| Bst1          | NM_009763    | 0.000389698 | 0.811593 | -1.23215 |
| Tradd         | NM_001033161 | 0.00032365  | 0.810271 | -1.23416 |
| Sema5b        | NM_013661    | 0.000428131 | 0.809928 | -1.23468 |

|               |                |             |          |          |
|---------------|----------------|-------------|----------|----------|
| Ankzf1        | NM_026187      | 0.000792666 | 0.809511 | -1.23531 |
| Arpc1b        | NM_023142      | 4.09E-05    | 0.809412 | -1.23546 |
| Snord55       | NR_030704      | 0.000744803 | 0.809411 | -1.23547 |
| Lrriq4        | NM_026668      | 0.00060234  | 0.808661 | -1.23661 |
| Daxx          | NM_007829      | 7.72E-05    | 0.808181 | -1.23735 |
| Kdm5c         | NM_013668      | 0.000195634 | 0.806766 | -1.23952 |
| Gm7108        | XR_031824      | 0.000582637 | 0.806476 | -1.23996 |
| Ltbp1         | NM_019919      | 0.000155333 | 0.804921 | -1.24236 |
| Krtcap3       | NM_027221      | 0.000209916 | 0.804321 | -1.24329 |
| Evc           | NM_021292      | 0.000326402 | 0.803577 | -1.24444 |
| Capza1        | NM_009797      | 0.000160167 | 0.803568 | -1.24445 |
| Lrtm2         | NM_172492      | 0.000351696 | 0.803518 | -1.24453 |
| Msi1          | NM_008629      | 8.04E-06    | 0.803309 | -1.24485 |
| 1110020G09Rik | NM_001085410   | 0.000999134 | 0.803168 | -1.24507 |
| Ezh1          | NM_007970      | 4.30E-05    | 0.803012 | -1.24531 |
| Fndc3b        | NM_173182      | 0.000119252 | 0.802724 | -1.24576 |
| Srrm1         | NM_016799      | 0.000918488 | 0.802393 | -1.24627 |
| Kdelr1        | NM_133950      | 1.72E-05    | 0.802058 | -1.24679 |
| Paqr8         | NM_028829      | 0.000229231 | 0.80188  | -1.24707 |
| Tmco4         | NM_029857      | 0.00077673  | 0.801634 | -1.24745 |
| 1700037H04Rik | BC071212       | 0.000722413 | 0.801214 | -1.24811 |
| Pgc           | NM_025973      | 0.000783882 | 0.800893 | -1.24861 |
| Pola2         | NM_008893      | 0.000124039 | 0.800587 | -1.24908 |
| Supt6h        | NM_009297      | 3.74E-07    | 0.800458 | -1.24928 |
| Shank1        | NM_001034115   | 0.000141884 | 0.800258 | -1.2496  |
| Top2a         | NM_011623      | 0.000617622 | 0.800177 | -1.24972 |
|               | 6-三月 NM_172606 | 0.00014677  | 0.79973  | -1.25042 |
| Slfn8         | NM_181545      | 0.000810612 | 0.799549 | -1.25071 |
| Oaz1          | NM_008753      | 0.000251677 | 0.799076 | -1.25145 |
| 4631416L12Rik | NM_001081295   | 0.000489399 | 0.798906 | -1.25171 |
| Dcaf8         | NM_153555      | 0.000275803 | 0.798556 | -1.25226 |
| Fnbp1l        | NM_001114665   | 0.000323172 | 0.797301 | -1.25423 |
| 4933439F18Rik | NM_025757      | 0.000151276 | 0.796552 | -1.25541 |
| Gigyf1        | NM_031408      | 0.000202008 | 0.796003 | -1.25628 |
| Srrt          | NM_031405      | 6.36E-05    | 0.795998 | -1.25628 |
| Uhrf1bp1      | NM_001080769   | 0.000238837 | 0.794846 | -1.25811 |
| Thbs1         | NM_011580      | 0.000154054 | 0.794608 | -1.25848 |
| Mettl2        | NM_172567      | 0.000299703 | 0.794545 | -1.25858 |
| Camta1        | NM_001081557   | 0.000522123 | 0.79407  | -1.25934 |
| Gpx4          | NM_008162      | 0.00036002  | 0.793394 | -1.26041 |
| Bat5          | NM_178592      | 0.000301413 | 0.793066 | -1.26093 |
| Crebzf        | NM_145151      | 0.000145074 | 0.793057 | -1.26094 |
| Psmc4         | NM_011874      | 0.000170075 | 0.791932 | -1.26273 |

|               |              |             |          |          |
|---------------|--------------|-------------|----------|----------|
| Il17rd        | NM_134437    | 3.32E-05    | 0.791429 | -1.26354 |
| Arrdc2        | NM_027560    | 0.000319894 | 0.790326 | -1.2653  |
| Tpd52         | NM_009412    | 0.000174388 | 0.789245 | -1.26703 |
| Aldh3a2       | NM_007437    | 0.00020969  | 0.789114 | -1.26724 |
| Eif6          | NM_010579    | 8.88E-06    | 0.78898  | -1.26746 |
| Lcn5          | NM_007947    | 5.03E-06    | 0.788358 | -1.26846 |
| Keap1         | NM_016679    | 0.00090257  | 0.788113 | -1.26885 |
| Arglu1        | NM_176849    | 0.000469716 | 0.787453 | -1.26992 |
| Slc38a4       | NM_027052    | 0.000198949 | 0.78733  | -1.27011 |
| Gm2509        | XR_031402    | 0.00047469  | 0.786405 | -1.27161 |
| Ttn           | NM_011652    | 3.63E-05    | 0.786229 | -1.27189 |
| Taf8          | NM_022015    | 0.000348542 | 0.785667 | -1.2728  |
| Paxip1        | NM_018878    | 4.74E-05    | 0.785467 | -1.27313 |
| Zc3hc1        | NM_172735    | 0.00017731  | 0.784734 | -1.27432 |
| 1110008J03Rik | BC021365     | 0.000161255 | 0.784375 | -1.2749  |
| Mxi1          | NM_010847    | 0.000335992 | 0.783986 | -1.27553 |
| Top1          | NM_009408    | 0.000603443 | 0.783783 | -1.27586 |
| Pdcd5         | NM_019746    | 0.00085564  | 0.783709 | -1.27598 |
| Lipc          | NM_008280    | 0.000275843 | 0.783583 | -1.27619 |
| Hal           | NM_010401    | 1.99E-05    | 0.783497 | -1.27633 |
| Tdp2          | NM_019551    | 0.000437699 | 0.783222 | -1.27678 |
| Rnf13         | NM_001113413 | 0.000995739 | 0.782967 | -1.27719 |
| Sv2c          | NM_029210    | 0.000308274 | 0.782421 | -1.27808 |
| Efhd2         | NM_025994    | 0.000254305 | 0.781934 | -1.27888 |
| Shoc2         | NM_019658    | 0.000179017 | 0.781376 | -1.27979 |
| Adam9         | NM_007404    | 5.29E-05    | 0.781056 | -1.28032 |
| Scfd2         | NM_001114660 | 0.000130413 | 0.781021 | -1.28037 |
| Mcf2l         | NM_178076    | 0.000423012 | 0.780577 | -1.2811  |
| Dennd4b       | NM_201407    | 0.000493783 | 0.779423 | -1.283   |
| Tep1          | NM_009351    | 0.000349614 | 0.77938  | -1.28307 |
| Hist1h4i      | NM_175656    | 0.000128585 | 0.7784   | -1.28469 |
| Armc8         | NM_028768    | 0.000543687 | 0.778392 | -1.2847  |
| Calm3         | NM_007590    | 0.000548953 | 0.778073 | -1.28523 |
| Hmg1l1        | NM_001111282 | 3.62E-05    | 0.777704 | -1.28584 |
| Tmtc4         | NM_028651    | 0.000291445 | 0.77705  | -1.28692 |
| Ets2          | NM_011809    | 0.000305502 | 0.776931 | -1.28712 |
| AA388235      | NR_033305    | 7.89E-05    | 0.776771 | -1.28738 |
| 1700029I01Rik | NM_027285    | 4.52E-05    | 0.776281 | -1.28819 |
| Smyd1         | NM_001160127 | 0.000746472 | 0.776186 | -1.28835 |
| Abi3          | NM_025659    | 0.000499062 | 0.775607 | -1.28931 |
| Cirh1a        | NM_011574    | 0.00010453  | 0.774856 | -1.29056 |
| Asf1b         | NM_024184    | 0.000124244 | 0.774751 | -1.29074 |
| Sdr39u1       | NM_001082975 | 0.000112152 | 0.774691 | -1.29084 |



|               |                    |             |          |          |
|---------------|--------------------|-------------|----------|----------|
| Il27ra        | NM_016671          | 2.93E-05    | 0.774632 | -1.29094 |
| Mapk12        | NM_013871          | 0.00065627  | 0.774074 | -1.29187 |
| Gm8615        | NR_028061          | 5.53E-05    | 0.773967 | -1.29204 |
| Ufc1          | NM_025388          | 0.000863394 | 0.773835 | -1.29227 |
| Tex14         | NM_031386          | 2.02E-05    | 0.773739 | -1.29243 |
| Me1           | NM_008615          | 0.000102847 | 0.773552 | -1.29274 |
| Spsb2         | NM_013539          | 0.000757412 | 0.773438 | -1.29293 |
| Cdyl2         | NM_029441          | 0.000442145 | 0.773074 | -1.29354 |
|               | 10-九月 NM_001024911 | 3.19E-05    | 0.772937 | -1.29377 |
| Arhgdia       | NM_133796          | 2.41E-05    | 0.772784 | -1.29402 |
| Git1          | NM_001004144       | 0.000560671 | 0.772572 | -1.29438 |
| Csnk1a1       | NM_146087          | 6.37E-05    | 0.772545 | -1.29442 |
| Cxadr         | NM_009988          | 1.06E-05    | 0.77231  | -1.29482 |
| Kif2a         | NM_008442          | 0.000995283 | 0.772222 | -1.29496 |
| Ece2          | NM_139293          | 0.00094216  | 0.771918 | -1.29548 |
| Nfyc          | NM_008692          | 0.000993321 | 0.771163 | -1.29674 |
| Nfkbib        | NM_010908          | 5.56E-06    | 0.770886 | -1.29721 |
| Psmb5         | NM_011186          | 0.000948019 | 0.770723 | -1.29748 |
| Stk30         | NM_011973          | 3.01E-05    | 0.77052  | -1.29782 |
| Sos1          | NM_009231          | 0.000267379 | 0.770353 | -1.29811 |
| Fmn1          | NM_010230          | 0.000830168 | 0.770173 | -1.29841 |
| Tmem145       | NM_183311          | 0.000107865 | 0.770095 | -1.29854 |
| Idi1          | NM_145360          | 0.000295844 | 0.770019 | -1.29867 |
| Kcmf1         | NM_019715          | 0.000166807 | 0.769861 | -1.29894 |
| Spred3        | NM_182927          | 0.000336584 | 0.768983 | -1.30042 |
| Serpini1      | NM_009250          | 0.000149457 | 0.768764 | -1.30079 |
| Psmd13        | NM_011875          | 0.000555847 | 0.768418 | -1.30138 |
| Rbm10         | NM_145627          | 0.000861145 | 0.768409 | -1.30139 |
| 4930402H24Rik | BC052447           | 0.000218843 | 0.768109 | -1.3019  |
| Cabin1        | NM_172549          | 0.000169235 | 0.76788  | -1.30229 |
| Imp4          | NM_178601          | 0.000464245 | 0.767427 | -1.30306 |
| Spast         | NM_001162870       | 0.000324648 | 0.766998 | -1.30379 |
| Vill          | NM_001164567       | 0.000478113 | 0.766752 | -1.3042  |
| Plin2         | NM_007408          | 0.000264343 | 0.766611 | -1.30444 |
| Hnrnpul2      | NM_001081196       | 0.000437964 | 0.766567 | -1.30452 |
| Adprh         | NM_007414          | 0.000297583 | 0.766115 | -1.30529 |
| Ssr2          | NM_025448          | 0.000108328 | 0.765825 | -1.30578 |
| Spred2        | NM_033523          | 5.37E-05    | 0.765725 | -1.30595 |
| Cnot3         | NM_146176          | 0.000202389 | 0.76558  | -1.3062  |
| Dhx37         | NM_203319          | 0.000106956 | 0.7654   | -1.30651 |
| Scn3a         | NM_018732          | 0.000203111 | 0.765267 | -1.30673 |
| Ino80d        | NM_001114609       | 9.41E-05    | 0.765134 | -1.30696 |
| Rassf8        | NM_027760          | 0.000850245 | 0.765125 | -1.30698 |

|          |              |             |          |          |
|----------|--------------|-------------|----------|----------|
| Gmpr2    | NM_177992    | 6.51E-05    | 0.764791 | -1.30755 |
| Mrfap1   | NM_026242    | 0.000109054 | 0.764479 | -1.30808 |
| Tmem39a  | NM_026407    | 0.000161208 | 0.76426  | -1.30846 |
| Hook2    | NM_133255    | 0.000226669 | 0.764194 | -1.30857 |
| Krt18    | NM_010664    | 0.000385819 | 0.764082 | -1.30876 |
| Aldh1l2  | NM_153543    | 2.30E-05    | 0.763885 | -1.3091  |
| Dtx2     | NM_023742    | 5.76E-05    | 0.76351  | -1.30974 |
| Abcb7    | NM_009592    | 5.00E-05    | 0.763228 | -1.31022 |
| Ptov1    | NM_133949    | 0.000256149 | 0.763196 | -1.31028 |
| Ppp1r15a | NM_008654    | 8.04E-05    | 0.763138 | -1.31038 |
| Cotl1    | NM_028071    | 0.000638633 | 0.762975 | -1.31066 |
| Ddx46    | NM_145975    | 0.000671881 | 0.762959 | -1.31069 |
| Gsta3    | NM_001077353 | 0.000730072 | 0.762717 | -1.3111  |
| Gbp1     | NM_010259    | 0.000634262 | 0.76242  | -1.31161 |
| Gm13251  | NM_001085522 | 1.20E-05    | 0.762038 | -1.31227 |
| Ambra1   | NM_172669    | 0.000205599 | 0.761988 | -1.31236 |
| Ppp2r5b  | NM_198168    | 2.29E-05    | 0.761577 | -1.31307 |
| Atxn2l   | NM_183020    | 2.42E-06    | 0.761303 | -1.31354 |
| Tmem143  | NM_144801    | 0.000337525 | 0.761002 | -1.31406 |
| Qdpr     | NM_024236    | 0.000432337 | 0.760792 | -1.31442 |
| Maz      | NM_010772    | 0.000296818 | 0.760703 | -1.31457 |
| Dhx8     | NM_144831    | 0.000306081 | 0.760632 | -1.3147  |
| Gm5666   | XR_034009    | 0.000760599 | 0.760443 | -1.31502 |
| Kdr      | NM_010612    | 0.000317346 | 0.760083 | -1.31565 |
| Igsf3    | NM_207205    | 0.000228762 | 0.759934 | -1.3159  |
| Mtmr3    | NM_028860    | 0.000113949 | 0.759786 | -1.31616 |
| Fhod3    | NM_175276    | 0.000412787 | 0.759397 | -1.31683 |
| Ngfrap1  | NM_009750    | 0.000227994 | 0.759276 | -1.31704 |
| Arih2    | NM_011790    | 0.000491778 | 0.758976 | -1.31756 |
| Zfp532   | NM_207255    | 0.000570398 | 0.758965 | -1.31758 |
| Rundc3a  | NM_016759    | 0.000846261 | 0.7589   | -1.3177  |
| Apex2    | NM_029943    | 0.000109495 | 0.758821 | -1.31783 |
| Amt      | NM_001013814 | 0.000284997 | 0.758327 | -1.31869 |
| Tbc1d9   | NM_001111304 | 0.000145941 | 0.758265 | -1.3188  |
| Tex264   | NM_011573    | 0.0001439   | 0.758225 | -1.31887 |
| Psma6    | NM_011968    | 0.00071335  | 0.758104 | -1.31908 |
| Cchcr1   | NM_146248    | 9.86E-05    | 0.758022 | -1.31922 |
| Acta1    | NM_009606    | 0.000272677 | 0.758012 | -1.31924 |
| Iars     | NM_172015    | 3.55E-05    | 0.757787 | -1.31963 |
| Shroom4  | NM_001040459 | 0.00065121  | 0.757509 | -1.32012 |
| Arhgef11 | NM_001003912 | 8.35E-06    | 0.757478 | -1.32017 |
| Arhgap8  | NM_001164627 | 7.08E-06    | 0.75693  | -1.32113 |
| Actn3    | NM_013456    | 8.39E-06    | 0.756857 | -1.32125 |

|               |                    |             |          |          |
|---------------|--------------------|-------------|----------|----------|
| Cbx8          | NM_013926          | 0.000845669 | 0.756619 | -1.32167 |
| Tmx3          | NM_198295          | 0.000295048 | 0.756497 | -1.32188 |
| Timm13        | NM_013895          | 0.000853004 | 0.756475 | -1.32192 |
| Spnb2         | NM_175836          | 7.24E-05    | 0.756372 | -1.3221  |
| Mll2          | NM_001033276       | 2.03E-05    | 0.755669 | -1.32333 |
| Tcfe3         | NM_172472          | 0.00070667  | 0.755553 | -1.32353 |
| Atp2a3        | NM_016745          | 0.000281883 | 0.755132 | -1.32427 |
| Twf1          | NM_008971          | 1.11E-05    | 0.755067 | -1.32439 |
| Rara          | NM_001177302       | 3.45E-07    | 0.754976 | -1.32455 |
| Msrb2         | NM_029619          | 4.49E-05    | 0.754945 | -1.3246  |
| 4933424B01Rik | NM_138757          | 0.000945839 | 0.754755 | -1.32493 |
| Cbl           | NM_007619          | 3.14E-05    | 0.754445 | -1.32548 |
| Slc15a4       | NM_133895          | 8.06E-05    | 0.754167 | -1.32597 |
| Serp1         | NM_030685          | 8.70E-06    | 0.753784 | -1.32664 |
| Lag3          | NM_008479          | 8.91E-05    | 0.753748 | -1.3267  |
| Prss16        | NM_019429          | 0.000346026 | 0.753658 | -1.32686 |
| Sh2d4b        | NM_177816          | 9.94E-05    | 0.753518 | -1.32711 |
| Trim44        | NM_020267          | 6.87E-06    | 0.753275 | -1.32754 |
| Tnfrsf1b      | NM_011610          | 6.10E-05    | 0.753158 | -1.32774 |
| Sphk2         | NM_020011          | 0.000820071 | 0.752818 | -1.32834 |
| Gm16505       | XM_001472218       | 0.000499945 | 0.752497 | -1.32891 |
| Haus4         | NM_145462          | 0.000610544 | 0.752435 | -1.32902 |
| Pdzk1         | NM_021517          | 9.22E-05    | 0.752434 | -1.32902 |
| Zfp318        | NM_207671          | 0.00047275  | 0.752421 | -1.32904 |
| Cnpy2         | NM_019953          | 0.000179241 | 0.751732 | -1.33026 |
| Brd2          | NM_001025387       | 0.000142781 | 0.751707 | -1.33031 |
| Shf           | NM_001013829       | 0.000128297 | 0.751606 | -1.33048 |
| Kank2         | NM_145611          | 0.000218682 | 0.751545 | -1.33059 |
| Nfil3         | NM_017373          | 0.000684515 | 0.75123  | -1.33115 |
| Ccdc61        | NM_001033314       | 0.000225014 | 0.750642 | -1.33219 |
| Sv2a          | NM_022030          | 0.000467031 | 0.750445 | -1.33254 |
| Bex1          | NM_009052          | 0.000828697 | 0.750214 | -1.33295 |
| 6030445D17Rik | ENSMUST00000084593 | 1.31E-05    | 0.750173 | -1.33303 |
| Bach1         | NM_007520          | 0.000250442 | 0.750136 | -1.33309 |
| Casq1         | NM_009813          | 0.00064902  | 0.750124 | -1.33311 |
| Calca         | NM_007587          | 0.000489364 | 0.749808 | -1.33367 |
| Rab3ip        | NM_001003950       | 0.00010123  | 0.749515 | -1.3342  |
| Rassf1        | NM_019713          | 0.000616519 | 0.749508 | -1.33421 |
| Mto1          | NM_026658          | 4.94E-05    | 0.748601 | -1.33582 |
| Slc35b2       | NM_028662          | 0.000971889 | 0.748537 | -1.33594 |
| Rfwd2         | NM_011931          | 0.000730619 | 0.748322 | -1.33632 |
| Trmt6         | NM_175113          | 0.000242941 | 0.747821 | -1.33722 |
| Rab5b         | NM_177411          | 0.000199949 | 0.74775  | -1.33734 |

|               |              |             |          |          |
|---------------|--------------|-------------|----------|----------|
| Erc2          | NM_177814    | 1.98E-05    | 0.747699 | -1.33744 |
| BC005537      | NM_024473    | 1.15E-05    | 0.747581 | -1.33765 |
| Fam178b       | NM_201365    | 0.000699615 | 0.747297 | -1.33816 |
| Rtn3          | NM_001003934 | 6.08E-05    | 0.746455 | -1.33966 |
| Ptms          | NM_026988    | 5.63E-06    | 0.746327 | -1.33999 |
| Psmid7        | NM_010817    | 9.29E-05    | 0.746248 | -1.34004 |
| Aire          | NM_009646    | 0.000154965 | 0.746161 | -1.34019 |
| Cd2bp2        | NM_027353    | 0.000280096 | 0.7461   | -1.3403  |
| BC023829      | NM_001033328 | 0.000321761 | 0.746076 | -1.34035 |
| Ryk           | NM_013649    | 4.00E-05    | 0.746003 | -1.34048 |
| Lig1          | NM_001083188 | 0.000182888 | 0.745868 | -1.34072 |
| Ccny          | NM_026484    | 0.000636401 | 0.745254 | -1.34183 |
| Arhgap9       | NM_146011    | 9.73E-05    | 0.745056 | -1.34218 |
| Boll          | NM_029267    | 0.000104692 | 0.744814 | -1.34262 |
| Atp10d        | NM_153389    | 0.000302108 | 0.74479  | -1.34266 |
| Dtna          | NM_207650    | 2.48E-05    | 0.744709 | -1.34281 |
| 5930416119Rik | NR_027360    | 0.000728793 | 0.744431 | -1.34331 |
| Zfp553        | NM_146201    | 6.85E-05    | 0.744317 | -1.34351 |
| Mtap7d3       | NM_177293    | 0.000612552 | 0.744243 | -1.34365 |
| Arhgap33      | NM_178252    | 0.000452336 | 0.744166 | -1.34379 |
| Dtl           | NM_029766    | 3.38E-06    | 0.744006 | -1.34408 |
| Itgb1         | NM_010578    | 9.00E-06    | 0.743647 | -1.34472 |
| Gnptab        | NM_001004164 | 2.22E-05    | 0.743527 | -1.34494 |
| Coro2b        | NM_175484    | 7.79E-05    | 0.743443 | -1.34509 |
| Foxp4         | NM_001110824 | 0.000358165 | 0.743381 | -1.34521 |
| Lrch4         | NM_146164    | 1.23E-05    | 0.742754 | -1.34634 |
| Eif2ak3       | BC054809     | 7.46E-05    | 0.742611 | -1.3466  |
| Incenp        | NM_016692    | 8.71E-06    | 0.742544 | -1.34672 |
| Vsig2         | NM_020518    | 0.00012256  | 0.742482 | -1.34683 |
| Zfp341        | NM_199304    | 0.000946353 | 0.742368 | -1.34704 |
| Fam40a        | NM_153563    | 4.25E-06    | 0.742242 | -1.34727 |
| H2-Q7         | NM_010394    | 0.0005886   | 0.741917 | -1.34786 |
| Gm9068        | XR_033560    | 0.000899461 | 0.74175  | -1.34816 |
| Cux1          | NM_009986    | 5.13E-05    | 0.741371 | -1.34885 |
| Fbn2          | NM_010181    | 5.16E-05    | 0.741284 | -1.34901 |
| Gpr149        | BC119599     | 0.000411735 | 0.740936 | -1.34964 |
| Abl1          | NM_001112703 | 0.000208952 | 0.740874 | -1.34976 |
| Ppp1cb        | NM_172707    | 1.28E-05    | 0.740764 | -1.34996 |
| Rars          | NM_025936    | 0.00023842  | 0.740528 | -1.35039 |
| Cbln3         | NM_019820    | 2.83E-05    | 0.74049  | -1.35046 |
| Ube2r2        | NM_026275    | 8.78E-05    | 0.7404   | -1.35062 |
| Rps6ka4       | NM_019924    | 9.03E-05    | 0.740375 | -1.35067 |
| Rnf122        | NM_175136    | 0.000793454 | 0.740354 | -1.3507  |

|                |                    |             |          |          |
|----------------|--------------------|-------------|----------|----------|
| Prickle2       | NM_001134461       | 0.000912323 | 0.740254 | -1.35089 |
| Stk39          | NM_016866          | 0.000699511 | 0.739999 | -1.35135 |
| Zfp622         | NM_144523          | 0.00015901  | 0.739922 | -1.35149 |
| Phka1          | NM_008832          | 0.00042552  | 0.73976  | -1.35179 |
| Qser1          | NM_001123327       | 0.00088732  | 0.738909 | -1.35335 |
| Usp39          | NM_138592          | 0.000116061 | 0.738671 | -1.35378 |
| Dcaf11         | NM_133734          | 0.000519072 | 0.738343 | -1.35438 |
| Dusp1          | NM_013642          | 0.000126814 | 0.738184 | -1.35468 |
| Pgrmc1         | NM_016783          | 0.0006294   | 0.737866 | -1.35526 |
| Dnajc2         | NM_009584          | 0.000243171 | 0.737569 | -1.3558  |
| Gm4795         | XM_910044          | 7.85E-05    | 0.737055 | -1.35675 |
| Sbf2           | NM_177324          | 0.000340229 | 0.736882 | -1.35707 |
| Pwwp2b         | NM_001098636       | 0.00015973  | 0.736764 | -1.35729 |
| Gnb5           | NM_138719          | 0.000303881 | 0.736381 | -1.35799 |
| Zfp292         | NM_013889          | 0.000138022 | 0.73633  | -1.35809 |
| 1700049E17Rik1 | ENSMUST00000100701 | 5.05E-07    | 0.7362   | -1.35833 |
| Myh13          | NM_001081250       | 7.96E-05    | 0.735433 | -1.35974 |
| Unkl           | NM_028789          | 7.04E-05    | 0.735066 | -1.36042 |
| Cacng4         | NM_019431          | 6.12E-05    | 0.734857 | -1.36081 |
| Lrig1          | NM_008377          | 4.77E-05    | 0.733936 | -1.36252 |
| Trib3          | NM_175093          | 9.76E-05    | 0.733676 | -1.363   |
| Dnd1           | NM_173383          | 0.000817307 | 0.733612 | -1.36312 |
| Gm13819        | XR_033041          | 2.83E-05    | 0.733318 | -1.36367 |
| Bard1          | NM_007525          | 0.000745771 | 0.733051 | -1.36416 |
| Ppargc1b       | NM_133249          | 0.000454366 | 0.732757 | -1.36471 |
| Bri3bp         | NM_029752          | 6.32E-05    | 0.732744 | -1.36473 |
| Asb13          | NM_178283          | 5.39E-05    | 0.732491 | -1.36521 |
| Fut8           | NM_016893          | 0.000434187 | 0.732305 | -1.36555 |
| Gm15770        | XR_034208          | 0.000408302 | 0.731431 | -1.36718 |
| Pank1          | NM_023792          | 0.000240345 | 0.731164 | -1.36768 |
| Mpp3           | NM_007863          | 0.000567179 | 0.730839 | -1.36829 |
| 1810029B16Rik  | BC016246           | 0.000394529 | 0.730184 | -1.36952 |
| Myl7           | NM_022879          | 0.000206761 | 0.729818 | -1.3702  |
| Phactr4        | NM_175306          | 0.000866953 | 0.729662 | -1.3705  |
| Gm8587         | XM_990056          | 0.000458711 | 0.729599 | -1.37062 |
| Atg2a          | NM_194348          | 0.000163849 | 0.728945 | -1.37185 |
| Ppp2r5e        | NM_012024          | 0.0007544   | 0.728598 | -1.3725  |
| Ripk1          | NM_009068          | 0.00019311  | 0.72857  | -1.37255 |
| Fam84b         | NM_001162926       | 0.000664734 | 0.72834  | -1.37298 |
| Myo1c          | NM_008659          | 5.72E-06    | 0.72821  | -1.37323 |
| Tspo           | NM_009775          | 0.000715916 | 0.72813  | -1.37338 |
| Naf1           | NM_001163564       | 2.62E-05    | 0.72788  | -1.37385 |
| Pou2f1         | NM_011137          | 9.08E-05    | 0.727261 | -1.37502 |

|          |              |             |          |          |
|----------|--------------|-------------|----------|----------|
| Clmn     | NM_053155    | 0.000130092 | 0.727028 | -1.37546 |
| Cdo1     | NM_033037    | 5.28E-05    | 0.726967 | -1.37558 |
| Khdrbs3  | BC057577     | 0.00018691  | 0.726636 | -1.37621 |
| Nacc1    | NM_025788    | 1.31E-05    | 0.726533 | -1.3764  |
| Gtsf1    | NM_028797    | 8.95E-07    | 0.726086 | -1.37725 |
| Fgd4     | NM_139232    | 4.14E-07    | 0.726038 | -1.37734 |
| Slmo1    | NM_144867    | 0.000132782 | 0.725663 | -1.37805 |
| Fhl1     | NM_001077361 | 0.000143821 | 0.725412 | -1.37853 |
| Tjp2     | NM_011597    | 7.26E-07    | 0.72538  | -1.37859 |
| Ankmy2   | NM_146033    | 4.45E-05    | 0.72497  | -1.37937 |
| Dlg1     | NM_007862    | 0.000834167 | 0.724631 | -1.38001 |
| Csrp2    | NM_007792    | 8.31E-06    | 0.724521 | -1.38022 |
| Zfp568   | NM_001167872 | 2.37E-05    | 0.723313 | -1.38253 |
| Gm4881   | XM_992867    | 4.28E-05    | 0.723306 | -1.38254 |
| Pcgf6    | NM_027654    | 0.000305339 | 0.723295 | -1.38256 |
| BC048403 | BC065058     | 0.000395488 | 0.723066 | -1.383   |
| Rp2h     | NM_133669    | 0.000120138 | 0.722993 | -1.38314 |
| Ing1     | NM_011919    | 0.000334657 | 0.722944 | -1.38323 |
| Atn1     | NM_007881    | 0.000141949 | 0.722642 | -1.38381 |
| Ing3     | NM_023626    | 1.67E-05    | 0.722185 | -1.38469 |
| Camk2d   | NM_001025439 | 6.46E-06    | 0.722177 | -1.3847  |
| Nova1    | NM_021361    | 0.000172014 | 0.7221   | -1.38485 |
| Mkrn1    | NM_018810    | 1.62E-07    | 0.72209  | -1.38487 |
| Brpf3    | NM_001081315 | 4.33E-05    | 0.721862 | -1.38531 |
| Pcnx     | NM_018814    | 0.000496829 | 0.721744 | -1.38553 |
| Camk1d   | NM_177343    | 1.81E-05    | 0.721632 | -1.38575 |
| Eif4e2   | NM_001039169 | 1.06E-05    | 0.72126  | -1.38646 |
| R3hdm1   | NM_181750    | 0.000101633 | 0.721197 | -1.38658 |
| Slc7a1   | NM_007513    | 5.39E-05    | 0.721164 | -1.38665 |
| Nefm     | NM_008691    | 0.000281178 | 0.720317 | -1.38828 |
| Rbm27    | NM_172626    | 0.000213086 | 0.720288 | -1.38833 |
| H2-K1    | NM_001001892 | 0.000147991 | 0.720216 | -1.38847 |
| Nup62cl  | NM_001081668 | 3.20E-05    | 0.720211 | -1.38848 |
| Fzd4     | NM_008055    | 0.000628274 | 0.720058 | -1.38878 |
| Setd5    | NM_028385    | 0.000971112 | 0.719793 | -1.38929 |
| Hist1h4h | NM_153173    | 0.000172618 | 0.719715 | -1.38944 |
| Fam108b  | NM_146096    | 3.11E-05    | 0.719467 | -1.38992 |
| Vps26a   | NM_133672    | 0.000282154 | 0.719319 | -1.3902  |
| Stat6    | NM_009284    | 6.09E-07    | 0.719161 | -1.39051 |
| H2-D1    | NM_010380    | 8.70E-05    | 0.718906 | -1.391   |
| Hapln4   | NM_177900    | 3.24E-06    | 0.718731 | -1.39134 |
| Wdr45    | NM_172372    | 0.000107637 | 0.718696 | -1.39141 |
| Nags     | NM_178053    | 0.000870011 | 0.718486 | -1.39182 |

|               |                    |             |          |          |
|---------------|--------------------|-------------|----------|----------|
| Ctsa          | NM_008906          | 2.78E-06    | 0.718455 | -1.39187 |
| Adamts8       | NM_013906          | 0.000169719 | 0.718362 | -1.39206 |
| Aym1          | NM_001012726       | 0.000626382 | 0.717953 | -1.39285 |
| Snora73b      | NR_028513          | 7.92E-05    | 0.717874 | -1.393   |
| Pxdn          | NM_181395          | 0.00018911  | 0.717813 | -1.39312 |
| Brd4          | NM_020508          | 0.000687023 | 0.717684 | -1.39337 |
| Gm4924        | DQ459435           | 0.000384179 | 0.717553 | -1.39363 |
| Fxr2          | NM_011814          | 2.66E-05    | 0.717457 | -1.39381 |
| Tpm1          | NM_001164248       | 6.69E-05    | 0.717312 | -1.39409 |
| H2afx         | NM_010436          | 3.08E-05    | 0.716887 | -1.39492 |
| Trip12        | NM_133975          | 2.19E-06    | 0.716793 | -1.3951  |
| Prcc          | NM_033573          | 1.27E-06    | 0.716169 | -1.39632 |
| AU015836      | NR_028320          | 6.61E-05    | 0.716072 | -1.39651 |
| 5730419I09Rik | NM_029081          | 6.94E-05    | 0.715676 | -1.39728 |
| P2rx2         | NM_153400          | 1.29E-06    | 0.715632 | -1.39737 |
| Stk17b        | NM_133810          | 0.000504425 | 0.715573 | -1.39748 |
| Pcolce2       | NM_029620          | 6.89E-05    | 0.715569 | -1.39749 |
| Flrt3         | NM_001172160       | 0.000293533 | 0.715298 | -1.39802 |
| Plk3          | NM_013807          | 5.95E-05    | 0.715126 | -1.39836 |
| Sdhd          | NM_023374          | 0.000151012 | 0.715003 | -1.3986  |
| Mt3           | NM_013603          | 0.000495361 | 0.714718 | -1.39915 |
| Cuta          | NM_026307          | 1.14E-05    | 0.714604 | -1.39938 |
| Epb4.1l2      | NM_013511          | 9.95E-07    | 0.714373 | -1.39983 |
|               | 7-九月 NM_009859     | 0.000381423 | 0.714169 | -1.40023 |
| Lphn1         | NM_181039          | 1.65E-05    | 0.713955 | -1.40065 |
| Trnt1         | NM_027296          | 0.000667691 | 0.713927 | -1.4007  |
| Tmem102       | NM_001033433       | 0.000616348 | 0.713629 | -1.40129 |
| Syngn3        | NM_011522          | 6.63E-05    | 0.713438 | -1.40166 |
| Ddr2          | NM_022563          | 6.81E-05    | 0.713353 | -1.40183 |
| 5430407P10Rik | NM_001159657       | 1.35E-05    | 0.712722 | -1.40307 |
| Gata2         | NM_008090          | 0.000352321 | 0.712558 | -1.4034  |
| Slc44a1       | NM_133891          | 2.51E-07    | 0.712495 | -1.40352 |
| Fndc4         | NM_022424          | 6.48E-05    | 0.71197  | -1.40455 |
| Olfr161       | ENSMUST00000061541 | 4.20E-05    | 0.711788 | -1.40491 |
| Epdr1         | NM_134065          | 0.000220678 | 0.71175  | -1.40499 |
| Tmem55b       | NM_001033271       | 3.83E-05    | 0.711592 | -1.4053  |
| Lrmp          | NM_008511          | 0.000501219 | 0.71159  | -1.4053  |
| Kcnk1         | NM_008430          | 0.000605519 | 0.711502 | -1.40548 |
| Phf16         | NM_199317          | 1.65E-06    | 0.7113   | -1.40588 |
| D10Ertd610e   | NM_028027          | 9.96E-05    | 0.711245 | -1.40599 |
| Rilpl2        | NM_030259          | 0.000298238 | 0.71117  | -1.40613 |
| Zdhhc18       | NM_001017968       | 8.90E-07    | 0.710914 | -1.40664 |
| Lmbrd2        | NM_177178          | 0.000123283 | 0.710765 | -1.40694 |

|               |              |             |          |          |
|---------------|--------------|-------------|----------|----------|
| Plekhh1       | NM_181073    | 0.00037629  | 0.710654 | -1.40715 |
| Rasgrp4       | NM_001174155 | 6.90E-07    | 0.70987  | -1.40871 |
| Sfrs15        | NM_178923    | 1.95E-05    | 0.709496 | -1.40945 |
| Mpdu1         | NM_011900    | 0.000256115 | 0.709494 | -1.40945 |
| Ctdsp1        | NM_153088    | 0.000280694 | 0.709478 | -1.40949 |
| Gbp4          | NM_008620    | 1.76E-05    | 0.709208 | -1.41002 |
| Bpnt1         | NM_011794    | 2.12E-05    | 0.709122 | -1.41019 |
| Srpk2         | NM_009274    | 0.000129883 | 0.708962 | -1.41051 |
| Tmem138       | NM_028411    | 0.000162905 | 0.708643 | -1.41115 |
| Calm2         | NM_007589    | 8.36E-06    | 0.7085   | -1.41143 |
| Oxsr1         | NM_133985    | 2.51E-05    | 0.707563 | -1.4133  |
| Eif3g         | NM_016876    | 0.000115139 | 0.707187 | -1.41405 |
| Ube2d2        | NM_019912    | 2.74E-06    | 0.707148 | -1.41413 |
| Hist2h4       | NM_033596    | 9.99E-05    | 0.7071   | -1.41423 |
| 7420416P09Rik | NM_001168588 | 0.000973615 | 0.706626 | -1.41518 |
| Rpusd4        | NM_028040    | 8.30E-05    | 0.706444 | -1.41554 |
| Ccdc85a       | NM_181577    | 0.000130278 | 0.706427 | -1.41558 |
| Lonrf1        | NM_001081150 | 0.000569614 | 0.706369 | -1.41569 |
| Mtf1          | NM_008636    | 0.000126443 | 0.70636  | -1.41571 |
| Adap1         | NM_172723    | 6.82E-06    | 0.706347 | -1.41573 |
| Al846148      | NM_001033139 | 2.27E-07    | 0.706029 | -1.41637 |
| Foxr1         | NM_001033469 | 8.80E-05    | 0.706004 | -1.41642 |
| Rnf44         | NR_027395    | 4.59E-05    | 0.705991 | -1.41645 |
| Bak1          | NM_007523    | 0.00051555  | 0.70573  | -1.41697 |
| Zcchc18       | NM_001035510 | 0.000159442 | 0.705562 | -1.41731 |
| Usp48         | NM_130879    | 0.00067385  | 0.70548  | -1.41747 |
| Phospho1      | NM_153104    | 0.000150773 | 0.705359 | -1.41772 |
| Pfice1        | NM_019588    | 0.000825892 | 0.704992 | -1.41846 |
| Rel           | NM_009044    | 1.52E-05    | 0.704857 | -1.41873 |
| Ddx26b        | NM_172779    | 0.000450377 | 0.704723 | -1.419   |
| Arhgap30      | NM_001005508 | 0.000564238 | 0.704502 | -1.41944 |
| Cyb5b         | NM_025558    | 7.42E-07    | 0.704442 | -1.41956 |
| Prune2        | NM_181348    | 2.97E-08    | 0.704429 | -1.41959 |
| Dnaja2        | NM_019794    | 5.87E-05    | 0.70427  | -1.41991 |
| Arl5c         | NM_207231    | 0.000109866 | 0.704205 | -1.42004 |
| Aes           | NM_010347    | 0.000971068 | 0.703972 | -1.42051 |
| 1810013L24Rik | NM_001081400 | 0.000295946 | 0.703602 | -1.42126 |
| Efha2         | NM_030110    | 2.27E-06    | 0.703497 | -1.42147 |
| Egln1         | NM_053207    | 0.000225695 | 0.702838 | -1.4228  |
| Gdi1          | NM_010273    | 0.000321432 | 0.702777 | -1.42293 |
| Zbtb11        | NM_173026    | 3.78E-06    | 0.70267  | -1.42314 |
| Plekhh3       | NM_153804    | 3.96E-05    | 0.702604 | -1.42328 |
| Rnf217        | NM_001146349 | 0.000297872 | 0.702531 | -1.42342 |



|               |              |             |          |          |
|---------------|--------------|-------------|----------|----------|
| Znfx1         | NM_001033196 | 7.60E-06    | 0.702483 | -1.42352 |
| Mvd           | NM_138656    | 8.65E-06    | 0.702413 | -1.42366 |
| Mapk6         | NM_015806    | 0.000435713 | 0.70227  | -1.42395 |
| Zfp217        | NM_001033299 | 1.11E-05    | 0.702238 | -1.42402 |
| Cpt1b         | NM_009948    | 0.000239856 | 0.702153 | -1.42419 |
| Alms1         | NM_145223    | 0.000167239 | 0.701936 | -1.42463 |
| Ncoa7         | NM_172495    | 0.000110089 | 0.701707 | -1.4251  |
| Ppp2r2a       | NM_028032    | 8.94E-06    | 0.701659 | -1.42519 |
| Foxp1         | NM_053202    | 7.45E-07    | 0.70156  | -1.42539 |
| Rnf220        | NM_025739    | 0.000152352 | 0.70152  | -1.42548 |
| Cdc42ep4      | NM_020006    | 0.000468443 | 0.701355 | -1.42581 |
| Rln3          | NM_173184    | 2.28E-05    | 0.701331 | -1.42586 |
| Sc5d          | NM_172769    | 5.11E-06    | 0.701272 | -1.42598 |
| Ppp3r1        | NM_024459    | 0.000270516 | 0.700864 | -1.42681 |
| Cpt1a         | NM_013495    | 2.92E-05    | 0.700846 | -1.42685 |
| Sort1         | NM_019972    | 5.12E-06    | 0.700834 | -1.42687 |
| Yipf5         | NM_023311    | 0.000372287 | 0.700664 | -1.42722 |
| Galk1         | NM_016905    | 3.14E-05    | 0.700235 | -1.42809 |
| Ssh1          | NM_198109    | 2.48E-05    | 0.699838 | -1.4289  |
| Tmem79        | NM_024246    | 9.99E-05    | 0.699789 | -1.429   |
| Pdpf          | NM_025598    | 0.000101242 | 0.699586 | -1.42942 |
| Arf6          | NM_007481    | 5.30E-06    | 0.699575 | -1.42944 |
| Myo9a         | NM_173018    | 6.44E-05    | 0.699425 | -1.42975 |
| 1700061G19Rik | BC116283     | 3.42E-05    | 0.699237 | -1.43013 |
| Ncoa3         | NM_008679    | 8.30E-07    | 0.699074 | -1.43046 |
| Dgat1         | NM_010046    | 2.26E-05    | 0.699022 | -1.43057 |
| Polr1c        | NM_009085    | 0.000732161 | 0.698753 | -1.43112 |
| Fryl          | NM_177136    | 3.85E-05    | 0.698476 | -1.43169 |
| Depdc6        | NM_001037937 | 1.49E-08    | 0.698279 | -1.43209 |
| Fkbp11        | NM_024169    | 1.12E-05    | 0.698203 | -1.43225 |
| Cd99l2        | NM_138309    | 6.37E-06    | 0.697918 | -1.43283 |
| Slc20a1       | NM_015747    | 4.58E-07    | 0.697834 | -1.43301 |
| Cidea         | NM_007702    | 0.000168441 | 0.697747 | -1.43318 |
| Gng2          | NM_010315    | 4.07E-06    | 0.697682 | -1.43332 |
| Osgep         | NM_133676    | 1.71E-06    | 0.69734  | -1.43402 |
| Leprot1       | NM_026609    | 0.000974865 | 0.696675 | -1.43539 |
| Adhfe1        | NM_175236    | 0.000889128 | 0.69628  | -1.4362  |
| Tmem194       | NM_001113211 | 0.00047267  | 0.696025 | -1.43673 |
| Hist2h2aa1    | NM_013549    | 1.16E-06    | 0.69585  | -1.43709 |
| Pfkfb3        | NM_001177753 | 7.65E-05    | 0.695686 | -1.43743 |
| Lmo4          | NM_010723    | 6.47E-07    | 0.695686 | -1.43743 |
| Hlf           | NM_172563    | 5.28E-06    | 0.695638 | -1.43753 |
| Dazap2        | NM_011873    | 0.000296217 | 0.69557  | -1.43767 |

|               |                    |             |          |          |
|---------------|--------------------|-------------|----------|----------|
| Stmn1         | NM_019641          | 1.65E-05    | 0.694773 | -1.43932 |
| 1700016D06Rik | AY026045           | 0.000134021 | 0.694043 | -1.44083 |
| Atxn7         | NM_139227          | 9.34E-06    | 0.693927 | -1.44107 |
| Adam19        | NM_009616          | 6.01E-06    | 0.6939   | -1.44113 |
| Exoc5         | NM_207214          | 0.000102384 | 0.69371  | -1.44152 |
| Proca1        | NM_001045516       | 0.000111154 | 0.693386 | -1.4422  |
| Zfp444        | NM_001146024       | 1.30E-05    | 0.693354 | -1.44226 |
| Sephs2        | NM_009266          | 0.000185545 | 0.693323 | -1.44233 |
| Cpne9         | NM_170673          | 4.43E-06    | 0.693014 | -1.44297 |
| Mme           | NM_008604          | 0.000419637 | 0.69297  | -1.44306 |
| Hnrpll        | NM_144802          | 2.03E-05    | 0.692779 | -1.44346 |
| Taf5          | NM_177342          | 2.06E-05    | 0.692768 | -1.44348 |
| Itgb3         | NM_016780          | 0.000566685 | 0.692639 | -1.44375 |
| C530028O21Rik | NM_175696          | 2.69E-06    | 0.69186  | -1.44538 |
| Spire1        | NM_194355          | 2.77E-06    | 0.691406 | -1.44633 |
| Nfatc2ip      | NM_010900          | 2.64E-06    | 0.691317 | -1.44651 |
| Ank           | NM_020332          | 1.76E-05    | 0.691308 | -1.44653 |
| Loxl2         | NM_033325          | 0.000122266 | 0.691211 | -1.44674 |
| Al848100      | NM_172645          | 4.69E-05    | 0.690575 | -1.44807 |
| Rbm26         | NM_134077          | 0.000854329 | 0.690454 | -1.44832 |
| Akap12        | NM_031185          | 3.14E-05    | 0.690253 | -1.44874 |
| Tapbp         | NM_001025313       | 7.83E-05    | 0.690195 | -1.44887 |
| Dnahc8        | NM_013811          | 4.97E-05    | 0.69019  | -1.44888 |
| Abhd10        | NM_172511          | 8.26E-05    | 0.69017  | -1.44892 |
| Tbc1d25       | NM_172478          | 0.000871634 | 0.690167 | -1.44892 |
| Dapk3         | NM_007828          | 0.000491353 | 0.689888 | -1.44951 |
| Gm9900        | ENSMUST00000065533 | 3.73E-06    | 0.689689 | -1.44993 |
| Zfp2          | NM_001044697       | 0.000173737 | 0.689311 | -1.45072 |
| Fbxo17        | NM_015796          | 1.36E-05    | 0.688994 | -1.45139 |
| Aspg          | NM_001081169       | 0.000111722 | 0.68893  | -1.45153 |
| Fgf5          | NM_010203          | 0.000102597 | 0.68889  | -1.45161 |
| Nxph4         | NM_183297          | 7.37E-05    | 0.688843 | -1.45171 |
| Fnbp1         | NM_001177648       | 0.000208562 | 0.688226 | -1.45301 |
| Lig3          | NM_010716          | 2.22E-06    | 0.688201 | -1.45306 |
| Tnfaip8       | NM_134131          | 6.79E-05    | 0.688188 | -1.45309 |
| Rpl22l1       | NM_026517          | 0.000215268 | 0.687975 | -1.45354 |
| Npc1          | NM_008720          | 0.000498897 | 0.687918 | -1.45366 |
| Hopx          | NM_175606          | 5.81E-05    | 0.687699 | -1.45412 |
| Kcnab3        | NM_010599          | 1.85E-05    | 0.687587 | -1.45436 |
| Calcoco2      | NM_029755          | 0.00015902  | 0.68739  | -1.45478 |
| Cdk12         | BC057057           | 0.000569405 | 0.687257 | -1.45506 |
| Nlgn3         | NM_172932          | 0.000805128 | 0.686882 | -1.45585 |
| A230050P20Rik | NM_175687          | 4.02E-05    | 0.686816 | -1.45599 |

|           |              |             |          |          |
|-----------|--------------|-------------|----------|----------|
| Bhlhe40   | NM_011498    | 8.19E-05    | 0.686813 | -1.456   |
| Rfx3      | NM_011265    | 0.000271646 | 0.686497 | -1.45667 |
| Aurkc     | NM_001080966 | 5.39E-05    | 0.686367 | -1.45695 |
| Ctdsp2    | NM_146012    | 0.000156055 | 0.686268 | -1.45716 |
| Usp9x     | NM_009481    | 5.44E-05    | 0.686216 | -1.45727 |
| Wwc1      | NM_170779    | 2.40E-05    | 0.686195 | -1.45731 |
| Tm4sf5    | NM_029360    | 0.000614116 | 0.685841 | -1.45806 |
| Tprn      | NM_175286    | 0.000243563 | 0.685816 | -1.45812 |
| Ddx31     | NM_001033294 | 5.34E-05    | 0.685551 | -1.45868 |
| Creld1    | NM_133930    | 6.53E-05    | 0.685137 | -1.45956 |
| Suz12     | NM_199196    | 1.54E-05    | 0.684848 | -1.46018 |
| Rictor    | NM_030168    | 0.000529882 | 0.684743 | -1.4604  |
| Slc6a7    | NM_201353    | 3.16E-05    | 0.684541 | -1.46083 |
| Ccdc123   | NM_028120    | 1.07E-05    | 0.684153 | -1.46166 |
| Bmp2k     | NM_080708    | 0.000199574 | 0.683967 | -1.46206 |
| Hist2h2ab | NM_178213    | 2.19E-07    | 0.683618 | -1.46281 |
| Mapk8ip2  | NM_021921    | 3.52E-05    | 0.683609 | -1.46282 |
| Asns      | NM_012055    | 1.74E-06    | 0.683546 | -1.46296 |
| A2m       | NM_175628    | 3.55E-05    | 0.683311 | -1.46346 |
| Slc19a3   | NM_030556    | 4.83E-05    | 0.683066 | -1.46399 |
| Eif2c1    | NM_153403    | 1.76E-06    | 0.68241  | -1.46539 |
| Ahsa1     | NM_146036    | 1.01E-05    | 0.682069 | -1.46613 |
| Gm7367    | NR_003376    | 0.000261772 | 0.68184  | -1.46662 |
| Tiparp    | NM_178892    | 0.000639328 | 0.681559 | -1.46722 |
| Ubxn7     | NM_177633    | 3.41E-05    | 0.681263 | -1.46786 |
| Tram2     | NM_133252    | 0.000337718 | 0.681167 | -1.46807 |
| Rhou      | NM_133955    | 3.96E-06    | 0.680665 | -1.46915 |
| Hist4h4   | NM_175652    | 5.61E-06    | 0.680632 | -1.46922 |
| Ogt       | NM_139144    | 0.000826098 | 0.68033  | -1.46988 |
| Mtap7d1   | NM_144941    | 3.64E-05    | 0.680096 | -1.47038 |
| Mtap9     | NM_001081230 | 0.000639327 | 0.679762 | -1.4711  |
| Cpne5     | NM_153166    | 1.83E-05    | 0.679613 | -1.47142 |
| Lmln      | NM_172823    | 8.92E-06    | 0.679604 | -1.47145 |
| Igfbp2    | NM_008342    | 4.78E-07    | 0.679558 | -1.47154 |
| Map3k1    | NM_011945    | 1.59E-05    | 0.679327 | -1.47204 |
| M6pr      | NM_010749    | 3.44E-06    | 0.679225 | -1.47227 |
| Timm23    | NM_016897    | 4.89E-06    | 0.679157 | -1.47241 |
| Ldoc1     | NM_001018087 | 4.14E-05    | 0.679058 | -1.47263 |
| Nsd1      | NM_008739    | 0.000184329 | 0.678883 | -1.47301 |
| Dnaja1    | NM_008298    | 0.000325376 | 0.678747 | -1.4733  |
| Dtx1      | NM_008052    | 0.000128366 | 0.678327 | -1.47422 |
| Aff4      | NM_033565    | 0.000163493 | 0.678151 | -1.4746  |
| Fam160b1  | NM_145505    | 0.000291909 | 0.677736 | -1.4755  |

|               |              |             |          |          |
|---------------|--------------|-------------|----------|----------|
| Dnase2a       | NM_010062    | 1.36E-07    | 0.677501 | -1.47601 |
| Ccdc114       | NM_001033243 | 0.000120605 | 0.677114 | -1.47686 |
| Clock         | NM_007715    | 0.000142907 | 0.677108 | -1.47687 |
| Peg3          | NM_008817    | 2.12E-06    | 0.677005 | -1.47709 |
| Phf20         | NM_172674    | 0.000209481 | 0.676709 | -1.47774 |
| Slc25a1       | NM_153150    | 9.46E-07    | 0.676341 | -1.47854 |
| Gna14         | NM_008137    | 0.000451591 | 0.676303 | -1.47863 |
| Mrpl40        | NM_010922    | 0.00031109  | 0.675834 | -1.47965 |
| Pak4          | NM_027470    | 3.74E-06    | 0.675601 | -1.48016 |
| Sh3tc1        | NM_194344    | 1.24E-05    | 0.675502 | -1.48038 |
| Pafah1b3      | NM_008776    | 0.000197963 | 0.67533  | -1.48076 |
| Dnmbp         | NM_028029    | 7.84E-07    | 0.675291 | -1.48084 |
| Ehmt2         | NM_145830    | 2.33E-06    | 0.675251 | -1.48093 |
| Mtmt7         | NM_001040699 | 0.000554082 | 0.675114 | -1.48123 |
| Muc1          | NM_013605    | 4.45E-05    | 0.675071 | -1.48133 |
| Jub           | NM_010590    | 3.11E-05    | 0.674967 | -1.48155 |
| Gm12260       | XM_905850    | 5.68E-05    | 0.674953 | -1.48159 |
| Gcat          | NM_013847    | 6.12E-07    | 0.674947 | -1.4816  |
| Fdps          | NM_134469    | 1.37E-05    | 0.674727 | -1.48208 |
| Rap1a         | NM_145541    | 0.000114815 | 0.674559 | -1.48245 |
| Hif3a         | NM_001162950 | 0.000157508 | 0.674426 | -1.48274 |
| Mtmt12        | NM_172958    | 0.000112294 | 0.674294 | -1.48303 |
| Aasdhpt       | NM_026276    | 0.000571697 | 0.674002 | -1.48367 |
| Snora3        | NR_028079    | 0.000400313 | 0.673813 | -1.48409 |
| Acox1         | NM_028765    | 3.19E-05    | 0.672915 | -1.48607 |
| Atf2          | NM_001025093 | 0.000102175 | 0.672847 | -1.48622 |
| 2810474O19Rik | NM_026054    | 0.000792398 | 0.672316 | -1.4874  |
| 2410042D21Rik | BC080661     | 5.03E-06    | 0.672197 | -1.48766 |
| Sf3b1         | NM_031179    | 3.52E-05    | 0.671846 | -1.48844 |
| Kif13b        | NM_001081177 | 0.000305456 | 0.67176  | -1.48863 |
| Mnt           | NM_010813    | 1.79E-06    | 0.671381 | -1.48947 |
| Pcsk1         | NM_013628    | 0.000111138 | 0.671345 | -1.48955 |
| 4931417G12Rik | NM_027633    | 6.63E-05    | 0.671068 | -1.49016 |
| Tdgf1         | NM_011562    | 1.36E-08    | 0.67075  | -1.49087 |
| Cdc37l1       | NM_025950    | 3.69E-06    | 0.670579 | -1.49125 |
| Daam1         | NM_026102    | 4.62E-05    | 0.670403 | -1.49164 |
| Mfsd5         | NM_134100    | 0.000225123 | 0.670103 | -1.49231 |
| 6430598A04Rik | NM_175521    | 0.000370388 | 0.669832 | -1.49291 |
| Car2          | NM_009801    | 0.000171423 | 0.669682 | -1.49325 |
| Aamp          | NM_146110    | 7.16E-05    | 0.66963  | -1.49336 |
| Myst4         | NM_017479    | 7.60E-05    | 0.669626 | -1.49337 |
| Bmf           | NM_138313    | 9.81E-05    | 0.669619 | -1.49339 |
| Mrpl15        | NM_001177658 | 2.03E-05    | 0.669105 | -1.49453 |

|               |                    |             |          |          |
|---------------|--------------------|-------------|----------|----------|
| Wdr55         | NM_026464          | 4.70E-05    | 0.669085 | -1.49458 |
| Cnn2          | NM_007725          | 4.71E-06    | 0.669038 | -1.49468 |
| Jph1          | NM_020604          | 4.53E-05    | 0.668856 | -1.49509 |
| Bcat2         | NM_009737          | 3.46E-07    | 0.668727 | -1.49538 |
| Snord116      | AF241256           | 0.000375516 | 0.668716 | -1.4954  |
| Eya1          | NM_010164          | 6.09E-06    | 0.668543 | -1.49579 |
| Slc11a1       | NM_013612          | 8.14E-07    | 0.668464 | -1.49597 |
| Akirin2       | NM_001007589       | 1.76E-07    | 0.668256 | -1.49643 |
| Usp51         | NM_001137547       | 9.30E-05    | 0.668226 | -1.4965  |
| Trim26        | NM_001025599       | 9.04E-05    | 0.668126 | -1.49672 |
| Spag9         | NM_027569          | 9.95E-05    | 0.667382 | -1.49839 |
| Llg1          | NM_008502          | 1.10E-05    | 0.66727  | -1.49864 |
| Larp1         | NM_028451          | 1.04E-05    | 0.667201 | -1.4988  |
| B3gnt7        | NM_145222          | 1.66E-05    | 0.666961 | -1.49934 |
| Fam69a        | NM_026062          | 4.23E-05    | 0.666891 | -1.4995  |
| Tdh           | NM_021480          | 1.74E-05    | 0.666354 | -1.5007  |
| Hist1h4b      | NM_178193          | 5.62E-06    | 0.665927 | -1.50167 |
| Dip2c         | NM_001081426       | 0.000211241 | 0.665905 | -1.50172 |
| Atp11b        | NM_029570          | 2.59E-05    | 0.665715 | -1.50214 |
| 9430069I07Rik | AK020480           | 0.000258658 | 0.665428 | -1.50279 |
| Prdx4         | NM_016764          | 2.66E-05    | 0.665282 | -1.50312 |
| Actl6a        | NM_019673          | 5.98E-05    | 0.66527  | -1.50315 |
| Rpa1          | NM_001164223       | 0.000753525 | 0.665154 | -1.50341 |
| Slain2        | NM_153567          | 1.53E-07    | 0.665111 | -1.50351 |
| Pycr1         | NM_144795          | 4.31E-05    | 0.66486  | -1.50408 |
| Dnajb6        | NM_011847          | 3.55E-07    | 0.664739 | -1.50435 |
| Ywhah         | NM_011738          | 1.38E-06    | 0.664624 | -1.50461 |
| Ccng2         | NM_007635          | 0.000521541 | 0.664301 | -1.50534 |
| Tmeff1        | NM_021436          | 1.30E-06    | 0.664239 | -1.50548 |
| Fam134b       | NM_001034851       | 0.000136306 | 0.6642   | -1.50557 |
| Mex3d         | NM_198615          | 4.30E-05    | 0.66411  | -1.50577 |
| Hivep1        | NM_007772          | 5.75E-06    | 0.664047 | -1.50592 |
| Mllt4         | NM_010806          | 7.64E-05    | 0.663955 | -1.50613 |
| 4932422M17Rik | ENSMUST00000081006 | 0.000763631 | 0.663902 | -1.50625 |
| Dpf1          | NM_013874          | 3.50E-05    | 0.663642 | -1.50684 |
| Phgdh         | NM_016966          | 6.17E-05    | 0.663424 | -1.50733 |
| Kifc3         | NM_010631          | 4.77E-09    | 0.663057 | -1.50817 |
| Maged1        | NM_019791          | 0.000117277 | 0.663034 | -1.50822 |
| Zbtb32        | NM_021397          | 8.96E-05    | 0.663013 | -1.50827 |
| Cblb          | NM_001033238       | 0.000321938 | 0.662988 | -1.50832 |
| Elf3          | NM_001163131       | 0.000112652 | 0.662742 | -1.50888 |
| Trpm4         | NM_175130          | 0.000801961 | 0.662697 | -1.50899 |
| Nhedc2        | NM_178877          | 0.000343774 | 0.66233  | -1.50982 |

|               |              |             |          |          |
|---------------|--------------|-------------|----------|----------|
| Dppa4         | NM_001018002 | 0.000686953 | 0.662045 | -1.51047 |
| Pias4         | NM_021501    | 5.82E-05    | 0.661668 | -1.51133 |
| Homer1        | NM_147176    | 9.66E-06    | 0.661658 | -1.51135 |
| Klf5          | NM_009769    | 2.98E-06    | 0.661645 | -1.51138 |
| Chmp4c        | NM_025519    | 3.90E-05    | 0.661602 | -1.51148 |
| Atcay         | NM_178662    | 0.000297947 | 0.661165 | -1.51248 |
| Dhtkd1        | NM_001081131 | 1.18E-05    | 0.660781 | -1.51336 |
| Mcm9          | NM_027830    | 6.22E-05    | 0.660599 | -1.51378 |
| Tes           | NM_207176    | 5.30E-05    | 0.660155 | -1.5148  |
| Mllt6         | NM_139311    | 7.59E-09    | 0.659676 | -1.5159  |
| Crybg3        | NM_174848    | 0.000148146 | 0.659656 | -1.51594 |
| Aars          | NM_146217    | 6.22E-06    | 0.659314 | -1.51673 |
| Eea1          | NM_001001932 | 0.000316518 | 0.659196 | -1.517   |
| Mef2d         | NM_133665    | 5.20E-07    | 0.659081 | -1.51726 |
| Zfr           | NM_011767    | 0.000592921 | 0.658804 | -1.5179  |
| L3mbtl3       | NM_172787    | 2.59E-05    | 0.658684 | -1.51818 |
| Wdr26         | NM_145514    | 0.000545192 | 0.658618 | -1.51833 |
| Rpp25         | NM_133982    | 0.000855333 | 0.658483 | -1.51864 |
| 1110028C15Rik | NM_001122738 | 1.61E-06    | 0.658386 | -1.51887 |
| Patz1         | NM_019574    | 7.30E-05    | 0.658351 | -1.51895 |
| Pir           | NM_027153    | 2.07E-05    | 0.658112 | -1.5195  |
| Dusp16        | NM_130447    | 5.05E-06    | 0.658035 | -1.51968 |
| Mir92-1       | NR_029816    | 0.000652937 | 0.657937 | -1.5199  |
| Cnot6l        | NM_178854    | 4.31E-08    | 0.657717 | -1.52041 |
| Dsp           | NM_023842    | 9.68E-07    | 0.657304 | -1.52137 |
| Dbn1          | NM_001177371 | 2.67E-09    | 0.656803 | -1.52253 |
| Ttc9c         | NM_027412    | 1.95E-06    | 0.656658 | -1.52286 |
| Thumpd3       | NM_008188    | 0.000131599 | 0.656244 | -1.52382 |
| Hinfp         | NM_172162    | 0.000501873 | 0.656073 | -1.52422 |
| Trappc4       | NM_021789    | 2.27E-05    | 0.656068 | -1.52423 |
| Hist1h4m      | NM_175657    | 1.43E-05    | 0.655986 | -1.52442 |
| Spin1         | NM_146043    | 9.21E-05    | 0.655775 | -1.52491 |
| Tgif1         | NM_009372    | 3.65E-06    | 0.655501 | -1.52555 |
| Rassf2        | NM_175445    | 0.000283774 | 0.655302 | -1.52601 |
| Elf2          | NM_023502    | 2.66E-07    | 0.655206 | -1.52624 |
| Agpat3        | NM_053014    | 3.03E-05    | 0.655051 | -1.5266  |
| Kdm6b         | NM_001017426 | 3.17E-08    | 0.65505  | -1.5266  |
| Klhl2         | NM_178633    | 6.94E-05    | 0.654997 | -1.52672 |
| Hibadh        | NM_145567    | 0.000104422 | 0.654425 | -1.52806 |
| Ctbp2         | NM_009980    | 1.87E-05    | 0.654425 | -1.52806 |
| Max           | NM_008558    | 0.000555269 | 0.654396 | -1.52813 |
| H2-Ke2        | NM_010385    | 0.000500536 | 0.654105 | -1.52881 |
| Pbx1          | NM_183355    | 7.19E-05    | 0.654059 | -1.52891 |

|               |                    |             |          |          |
|---------------|--------------------|-------------|----------|----------|
| Pfkp          | NM_019703          | 6.28E-08    | 0.653881 | -1.52933 |
| Capn5         | NM_007602          | 3.44E-07    | 0.653688 | -1.52978 |
| Tro           | NM_001002272       | 1.80E-05    | 0.653058 | -1.53126 |
| 2610019F03Rik | NM_173744          | 3.92E-05    | 0.653052 | -1.53127 |
| Spcs3         | NM_029701          | 0.000314568 | 0.652976 | -1.53145 |
| Psemb10       | NM_013640          | 1.61E-06    | 0.652938 | -1.53154 |
| Parp12        | NM_172893          | 0.000527038 | 0.652659 | -1.53219 |
| Spc24         | NM_026282          | 0.00011392  | 0.652636 | -1.53225 |
| Sox2          | NM_011443          | 2.71E-06    | 0.652518 | -1.53252 |
| Gm15514       | ENSMUST00000078065 | 1.09E-05    | 0.652415 | -1.53277 |
| Trim8         | NM_053100          | 0.000281085 | 0.652349 | -1.53292 |
| 0610010F05Rik | NM_027860          | 7.57E-05    | 0.652349 | -1.53292 |
| Dcaf5         | NM_177267          | 1.47E-07    | 0.652085 | -1.53354 |
| Mllt10        | NM_010804          | 3.66E-07    | 0.65159  | -1.53471 |
| Fgfr3         | NM_008010          | 1.68E-05    | 0.651578 | -1.53473 |
| Pdk1          | NM_172665          | 4.80E-09    | 0.651231 | -1.53555 |
| 1700084J12Rik | NR_033608          | 7.13E-06    | 0.650752 | -1.53668 |
| Elmo1         | NM_080288          | 4.43E-07    | 0.65065  | -1.53692 |
| Slc44a2       | NM_152808          | 9.82E-07    | 0.65063  | -1.53697 |
| Chd7          | NM_001081417       | 9.09E-05    | 0.650414 | -1.53748 |
| Hiat1         | NM_008246          | 2.69E-06    | 0.650181 | -1.53803 |
| Klf10         | NM_013692          | 0.000623821 | 0.649949 | -1.53858 |
| 1700001L05Rik | NR_027980          | 0.000361652 | 0.649917 | -1.53866 |
| Anxa11        | NM_013469          | 0.000194861 | 0.649885 | -1.53873 |
| Tle6          | NM_053254          | 7.83E-06    | 0.649868 | -1.53877 |
| Slc26a6       | NM_134420          | 2.88E-07    | 0.649294 | -1.54013 |
| Slc39a1       | NM_013901          | 0.000387893 | 0.649095 | -1.54061 |
| Atad1         | NM_026487          | 3.02E-07    | 0.649034 | -1.54075 |
| Gm2607        | XR_031562          | 0.000323675 | 0.648746 | -1.54144 |
| Cbx1          | NM_007622          | 2.11E-08    | 0.648555 | -1.54189 |
| Exosc4        | NM_175399          | 7.13E-06    | 0.648301 | -1.54249 |
| Lpl           | NM_008509          | 1.40E-06    | 0.647788 | -1.54372 |
| 2610528E23Rik | NM_025599          | 0.000383457 | 0.647528 | -1.54433 |
| Tnip1         | NM_021327          | 7.61E-06    | 0.647337 | -1.54479 |
| Cep55         | NM_001164362       | 0.000312606 | 0.647296 | -1.54489 |
| Lama1         | NM_008480          | 1.41E-07    | 0.647223 | -1.54506 |
| Herpud1       | NM_022331          | 5.70E-06    | 0.647137 | -1.54527 |
| Fnbp4         | NM_018828          | 2.64E-08    | 0.646969 | -1.54567 |
| Klf6          | NM_011803          | 0.000397442 | 0.646861 | -1.54593 |
| Mars          | NM_001171582       | 6.61E-05    | 0.646832 | -1.546   |
| Rdh11         | NM_021557          | 6.10E-05    | 0.646792 | -1.54609 |
| Susd2         | NM_027890          | 0.000757715 | 0.646618 | -1.54651 |
| Gyk           | NM_212444          | 7.84E-05    | 0.646144 | -1.54764 |

|               |                    |             |          |          |
|---------------|--------------------|-------------|----------|----------|
| Elavl3        | ENSMUST00000003501 | 0.000263608 | 0.645914 | -1.54819 |
| Bnip1         | NM_134253          | 1.62E-06    | 0.645876 | -1.54829 |
| Tra2a         | NM_198102          | 0.000228027 | 0.645815 | -1.54843 |
| Lad1          | NM_133664          | 2.64E-05    | 0.645671 | -1.54878 |
| Grsf1         | NM_178700          | 1.64E-05    | 0.645669 | -1.54878 |
| Lrfn4         | NM_153388          | 1.42E-06    | 0.645613 | -1.54891 |
| Znrd1         | NM_023162          | 0.000370152 | 0.645608 | -1.54893 |
| Usp22         | NM_001004143       | 2.68E-05    | 0.645202 | -1.5499  |
| Pigl          | NM_001039536       | 0.000199933 | 0.644545 | -1.55148 |
| Gm12696       | XR_004941          | 6.95E-05    | 0.644351 | -1.55195 |
| Pipox         | NM_008952          | 7.05E-06    | 0.644216 | -1.55227 |
| Tada3         | NM_133932          | 7.04E-05    | 0.643851 | -1.55315 |
| Aim1l         | NM_001162970       | 2.02E-06    | 0.643352 | -1.55436 |
| Pdzd4         | NM_001029868       | 3.60E-07    | 0.643348 | -1.55437 |
| Id4           | NM_031166          | 5.62E-05    | 0.643121 | -1.55492 |
| Sgms2         | NM_028943          | 2.70E-06    | 0.642709 | -1.55591 |
| Dhodh         | NM_020046          | 3.60E-06    | 0.642704 | -1.55593 |
| Smad7         | NM_001042660       | 0.000217563 | 0.641931 | -1.5578  |
| Lrp2          | NM_001081088       | 0.000255258 | 0.641765 | -1.5582  |
| Hsph1         | NM_013559          | 4.47E-06    | 0.641653 | -1.55848 |
| Zfp593        | NM_024215          | 6.89E-05    | 0.641619 | -1.55856 |
| Phf17         | NM_172303          | 0.000529341 | 0.641547 | -1.55873 |
| Shkbp1        | NM_138676          | 0.000856004 | 0.641421 | -1.55904 |
| Rfx2          | NM_027787          | 3.56E-07    | 0.640822 | -1.5605  |
| Kdm2b         | ENSMUST00000121739 | 4.72E-05    | 0.64072  | -1.56074 |
| Malt1         | NM_172833          | 8.50E-05    | 0.640287 | -1.5618  |
| Gpr137b-ps    | NR_003568          | 0.000194447 | 0.640248 | -1.5619  |
| Zfp72         | NM_001081680       | 0.000237016 | 0.640081 | -1.5623  |
| Cep170        | NM_001099637       | 2.39E-05    | 0.639636 | -1.56339 |
| Dnajc6        | NM_001164585       | 0.000470463 | 0.639538 | -1.56363 |
| Ccdc106       | NM_146178          | 5.92E-06    | 0.639404 | -1.56396 |
| Ptpn9         | NM_019651          | 4.69E-06    | 0.639328 | -1.56414 |
| Hook1         | NM_030014          | 1.12E-05    | 0.639149 | -1.56458 |
| Mesdc1        | NM_030705          | 3.05E-06    | 0.63891  | -1.56517 |
| Eml2          | NM_028153          | 5.60E-06    | 0.638707 | -1.56566 |
| Lrrc16a       | NM_026825          | 7.83E-06    | 0.638564 | -1.56601 |
| Eno3          | NM_007933          | 4.16E-05    | 0.638431 | -1.56634 |
| Zfp36l2       | NM_001001806       | 6.06E-08    | 0.638081 | -1.5672  |
| Cldn7         | NM_016887          | 9.39E-05    | 0.637895 | -1.56766 |
| 4933434E20Rik | NM_025762          | 0.00054356  | 0.637686 | -1.56817 |
| Ccnb1ip1      | NM_001111119       | 0.000385783 | 0.637623 | -1.56833 |
| Kpna1         | NM_008465          | 4.68E-05    | 0.637513 | -1.5686  |
| Arrb2         | NM_145429          | 3.82E-06    | 0.637262 | -1.56921 |



|               |                    |             |          |          |
|---------------|--------------------|-------------|----------|----------|
| Mrps27        | NM_173757          | 3.90E-05    | 0.637025 | -1.5698  |
| Il2rg         | NM_013563          | 0.000276228 | 0.636997 | -1.56987 |
| Epn2          | NM_010148          | 4.81E-05    | 0.63689  | -1.57013 |
| Fhl3          | NM_010213          | 9.81E-05    | 0.636006 | -1.57231 |
| Ugdh          | NM_009466          | 1.30E-06    | 0.635891 | -1.5726  |
| Yes1          | NM_009535          | 3.46E-05    | 0.635833 | -1.57274 |
| Gm7035        | NR_004446          | 1.14E-06    | 0.635554 | -1.57343 |
| Shmt2         | NM_028230          | 2.19E-06    | 0.634359 | -1.5764  |
| Zfp59         | NM_011762          | 5.87E-06    | 0.634248 | -1.57667 |
| Rab6b         | NM_173781          | 4.68E-07    | 0.633787 | -1.57782 |
| Sec14l1       | NM_001166506       | 7.53E-05    | 0.633081 | -1.57958 |
| Usp43         | NM_173754          | 0.000150034 | 0.632282 | -1.58157 |
| F3            | NM_010171          | 7.66E-06    | 0.63208  | -1.58208 |
| Smarcad1      | NM_007958          | 8.39E-06    | 0.631261 | -1.58413 |
| Pla2g7        | NM_013737          | 7.12E-05    | 0.631085 | -1.58457 |
| Ifitm1        | NM_026820          | 9.43E-06    | 0.630978 | -1.58484 |
| Xpo1          | NM_134014          | 8.29E-08    | 0.630589 | -1.58582 |
| Chn1          | NM_001113246       | 1.61E-05    | 0.630546 | -1.58593 |
| A830080D01Rik | NM_001033472       | 0.000145358 | 0.629931 | -1.58747 |
| Cacnb1        | NM_031173          | 2.53E-06    | 0.629831 | -1.58773 |
| Mapk3         | NM_011952          | 1.69E-06    | 0.629616 | -1.58827 |
| Mobp          | NM_008614          | 7.06E-05    | 0.629478 | -1.58862 |
| 4933434E20Rik | NM_025762          | 0.000560258 | 0.629331 | -1.58899 |
| Ppp1r9a       | NM_181595          | 2.28E-05    | 0.629048 | -1.5897  |
| Tns3          | NM_001083587       | 7.95E-07    | 0.628971 | -1.5899  |
| Hmgb3         | NM_008253          | 0.000810565 | 0.628798 | -1.59034 |
| 2810008D09Rik | AK171830           | 2.37E-05    | 0.628641 | -1.59073 |
| Tcf7l1        | NM_001079822       | 1.55E-07    | 0.628513 | -1.59106 |
| Prdm1         | NM_007548          | 2.06E-05    | 0.628459 | -1.59119 |
| LOC100044384  | XR_030628          | 4.36E-05    | 0.628429 | -1.59127 |
| Pak1          | NM_011035          | 2.00E-05    | 0.628416 | -1.5913  |
| Tmem47        | NM_138751          | 5.33E-05    | 0.628007 | -1.59234 |
| Tsc22d1       | NM_207652          | 2.63E-05    | 0.62796  | -1.59246 |
| Celsr3        | NM_080437          | 9.44E-08    | 0.627083 | -1.59468 |
| Usp14         | NM_021522          | 8.73E-06    | 0.626894 | -1.59517 |
| Wdr31         | NM_023597          | 1.03E-05    | 0.626853 | -1.59527 |
| Setx          | NM_198033          | 1.79E-05    | 0.626702 | -1.59565 |
| Heatr2        | NM_001081265       | 2.74E-06    | 0.626429 | -1.59635 |
| Zfp740        | NM_153194          | 0.000756789 | 0.626056 | -1.5973  |
| Fads1         | NM_146094          | 2.19E-05    | 0.625849 | -1.59783 |
| Mybl2         | NM_008652          | 3.82E-05    | 0.625744 | -1.5981  |
| Atp1a3        | NM_144921          | 1.17E-05    | 0.6252   | -1.59949 |
| Gm9918        | ENSMUST00000066324 | 0.0001682   | 0.625061 | -1.59984 |

|               |                    |             |          |          |
|---------------|--------------------|-------------|----------|----------|
| Gtf2a1        | NM_031391          | 4.83E-07    | 0.624909 | -1.60023 |
| St6galnac6    | NM_016973          | 7.10E-05    | 0.624796 | -1.60052 |
| Ppp1r14d      | NM_028104          | 6.54E-05    | 0.624746 | -1.60065 |
| Qk            | NM_021881          | 2.70E-08    | 0.624736 | -1.60068 |
| BC028528      | BC028528           | 5.99E-05    | 0.6247   | -1.60077 |
| Igsf9         | NM_033608          | 1.80E-07    | 0.62417  | -1.60213 |
| Ugcg          | NM_011673          | 0.000347316 | 0.624038 | -1.60247 |
| Dohh          | NM_133964          | 0.000516348 | 0.623209 | -1.6046  |
| Oas1a         | NM_145211          | 0.000698432 | 0.623082 | -1.60493 |
| Acta2         | NM_007392          | 9.95E-05    | 0.62304  | -1.60503 |
| Tle3          | NM_001083927       | 3.28E-07    | 0.622827 | -1.60558 |
| Soat1         | NM_009230          | 1.21E-05    | 0.62265  | -1.60604 |
| Rest          | NM_011263          | 3.08E-06    | 0.622624 | -1.6061  |
| C230052I12Rik | NM_178643          | 2.82E-05    | 0.62234  | -1.60684 |
| Folr1         | NM_008034          | 9.32E-06    | 0.622248 | -1.60708 |
| Lin28b        | NM_001031772       | 0.000173866 | 0.622197 | -1.60721 |
| Scrn1         | NM_027268          | 3.15E-06    | 0.622053 | -1.60758 |
| Mir300        | NR_029651          | 1.04E-05    | 0.621868 | -1.60806 |
| Rheb1         | NM_026967          | 6.08E-05    | 0.621397 | -1.60928 |
| H2-Ab1        | NM_207105          | 0.0003313   | 0.621309 | -1.60951 |
| Tcfcp2l1      | NM_023755          | 1.78E-08    | 0.621158 | -1.6099  |
| Taf5l         | NM_133966          | 8.43E-06    | 0.620667 | -1.61117 |
| Kdelr3        | NM_134090          | 8.09E-05    | 0.620096 | -1.61265 |
| Tbrg1         | NM_025289          | 9.56E-08    | 0.620091 | -1.61267 |
| L1td1         | NM_001081202       | 0.000179728 | 0.619669 | -1.61376 |
|               | 1-九月 NM_017461     | 1.33E-05    | 0.619549 | -1.61408 |
| 6430411K18Rik | NR_002848          | 5.84E-05    | 0.619413 | -1.61443 |
| Snx12         | NM_001110310       | 1.46E-05    | 0.619139 | -1.61515 |
| Slc47a1       | NM_026183          | 1.92E-06    | 0.618773 | -1.6161  |
| Mcf2          | NM_133197          | 0.000245344 | 0.618611 | -1.61652 |
| Bahcc1        | NM_198423          | 9.83E-08    | 0.61836  | -1.61718 |
| Rnf145        | NM_028862          | 2.61E-07    | 0.618332 | -1.61725 |
| Anxa2         | NM_007585          | 3.42E-06    | 0.617503 | -1.61942 |
| Ubtf          | NM_011551          | 6.09E-06    | 0.617366 | -1.61979 |
| Aurka         | NM_011497          | 4.97E-07    | 0.617158 | -1.62033 |
| Gm9884        | ENSMUST00000064487 | 4.31E-06    | 0.616518 | -1.62201 |
| Dnmt3a        | NM_007872          | 7.30E-07    | 0.615805 | -1.62389 |
| 4930519F16Rik | BC107248           | 0.000281161 | 0.6154   | -1.62496 |
| Hsn2          | NM_001037155       | 1.51E-05    | 0.615137 | -1.62565 |
| Wdr5          | NM_080848          | 5.29E-07    | 0.614884 | -1.62632 |
| Txndc12       | NM_025334          | 8.46E-05    | 0.614726 | -1.62674 |
| Grtp1         | NM_025768          | 2.76E-06    | 0.614598 | -1.62708 |
| Esrrb         | NM_001159500       | 1.56E-07    | 0.614347 | -1.62775 |

|          |              |             |          |          |
|----------|--------------|-------------|----------|----------|
| Papd7    | NM_198600    | 8.01E-07    | 0.614301 | -1.62787 |
| Lifr     | NM_013584    | 0.000384684 | 0.614232 | -1.62805 |
| Wdr62    | NM_146186    | 7.16E-07    | 0.613702 | -1.62946 |
| Pigx     | NM_024464    | 0.00054827  | 0.613619 | -1.62968 |
| Mapk4    | NM_172632    | 4.43E-06    | 0.612964 | -1.63142 |
| Fblim1   | NM_133754    | 6.86E-08    | 0.612923 | -1.63153 |
| Rgs11    | NM_001081069 | 3.99E-05    | 0.612468 | -1.63274 |
| Trim25   | NM_009546    | 7.88E-07    | 0.612343 | -1.63307 |
| Rdm1     | NM_025654    | 0.000276308 | 0.611938 | -1.63415 |
| Sh3rf1   | NM_021506    | 5.13E-08    | 0.611766 | -1.63461 |
| Gm5246   | XR_034011    | 5.47E-05    | 0.611716 | -1.63474 |
| Brsk1    | NM_001003920 | 1.13E-07    | 0.611229 | -1.63605 |
| Ahcyl2   | NM_021414    | 2.16E-06    | 0.611094 | -1.63641 |
| Epha4    | NM_007936    | 5.51E-05    | 0.610503 | -1.63799 |
| Pbx2     | NM_017463    | 5.89E-06    | 0.610422 | -1.63821 |
| Cox4nb   | NM_010926    | 3.78E-05    | 0.610294 | -1.63855 |
| Pvrl3    | NM_021496    | 9.34E-10    | 0.609888 | -1.63964 |
| Impa2    | NM_053261    | 6.68E-06    | 0.609535 | -1.64059 |
| Marcks   | NM_008538    | 1.36E-05    | 0.609263 | -1.64133 |
| BC053749 | BC053749     | 0.000381726 | 0.60917  | -1.64158 |
| Sertad3  | NM_133210    | 0.000587521 | 0.609034 | -1.64194 |
| Atp1b2   | NM_013415    | 5.84E-05    | 0.608834 | -1.64248 |
| Vbp1     | NM_011692    | 0.000405632 | 0.608768 | -1.64266 |
| Ccnd2    | BC049086     | 0.000146461 | 0.608518 | -1.64334 |
| Slc43a1  | NM_001081349 | 7.20E-06    | 0.608408 | -1.64363 |
| Shc1     | NM_001113331 | 6.92E-06    | 0.608382 | -1.64371 |
| Mlh3     | NM_175337    | 5.62E-05    | 0.607673 | -1.64562 |
| Hvcn1    | NM_001042489 | 7.78E-05    | 0.607612 | -1.64579 |
| Phip     | NM_001081216 | 3.36E-06    | 0.607142 | -1.64706 |
| Gjb1     | NM_008124    | 7.77E-07    | 0.607092 | -1.6472  |
| Cacybp   | NM_009786    | 7.61E-07    | 0.606975 | -1.64752 |
| Sms      | NM_009214    | 1.79E-06    | 0.606958 | -1.64756 |
| Ccdc141  | NM_001025576 | 1.87E-05    | 0.606899 | -1.64772 |
| Gcnt2    | NM_023887    | 8.22E-06    | 0.606607 | -1.64851 |
| Crlf3    | NM_018776    | 3.48E-06    | 0.605294 | -1.65209 |
| Enox1    | NM_172813    | 4.04E-09    | 0.605253 | -1.6522  |
| Arid2    | NM_175251    | 6.88E-07    | 0.604992 | -1.65292 |
| Cdca2    | NM_175384    | 2.65E-05    | 0.60412  | -1.6553  |
| Pan3     | NM_028291    | 6.75E-06    | 0.604097 | -1.65536 |
| Fam3c    | NM_138587    | 6.68E-07    | 0.603561 | -1.65683 |
| Pnma5    | NM_001100461 | 0.000397818 | 0.60353  | -1.65692 |
| Gpr125   | NM_133911    | 5.15E-05    | 0.60352  | -1.65694 |
| Podxl    | NM_013723    | 5.66E-07    | 0.603192 | -1.65785 |

|                   |                    |             |          |          |
|-------------------|--------------------|-------------|----------|----------|
| Exoc3l            | NM_177788          | 5.37E-06    | 0.603088 | -1.65813 |
| Erbp2             | NM_001003817       | 4.25E-08    | 0.602878 | -1.65871 |
| Abca7             | NM_013850          | 3.16E-06    | 0.60283  | -1.65884 |
| Usp13             | NM_001013024       | 1.73E-06    | 0.602684 | -1.65924 |
| Psmc3             | NM_009439          | 4.99E-06    | 0.602632 | -1.65939 |
| Wsb2              | NM_021539          | 1.60E-05    | 0.602414 | -1.65999 |
| Hsd17b14          | NM_025330          | 2.50E-07    | 0.602274 | -1.66037 |
| Cldn3             | NM_009902          | 8.55E-05    | 0.601914 | -1.66137 |
| D14Erd436e        | NM_172599          | 0.000253986 | 0.601882 | -1.66146 |
| Sirt1             | NM_019812          | 9.46E-09    | 0.601581 | -1.66229 |
| Twf2              | NM_011876          | 1.52E-06    | 0.60144  | -1.66268 |
| Taok1             | NM_144825          | 2.47E-06    | 0.601162 | -1.66345 |
| Parp9             | NM_030253          | 5.89E-05    | 0.600231 | -1.66602 |
| Tbc1d13           | NM_146252          | 4.94E-08    | 0.600101 | -1.66639 |
| Rps6ka6           | NM_025949          | 5.75E-07    | 0.600096 | -1.6664  |
| 2210409E12Rik     | NR_003492          | 1.37E-05    | 0.599981 | -1.66672 |
| Tnfrsf12-Tnfrsf13 | NM_001034097       | 8.80E-05    | 0.599961 | -1.66678 |
| Mitf              | NM_001113198       | 2.92E-05    | 0.599914 | -1.6669  |
| Cspg5             | NM_001166273       | 2.27E-07    | 0.599876 | -1.66701 |
| Kdm3b             | NM_001081256       | 1.01E-05    | 0.599613 | -1.66774 |
| Notum             | NM_175263          | 6.53E-05    | 0.599269 | -1.6687  |
| Meis2             | NM_001136072       | 3.54E-06    | 0.59896  | -1.66956 |
| Gtf2e2            | NM_001167922       | 0.00085935  | 0.598504 | -1.67083 |
| Ptger1            | NM_011197          | 1.37E-06    | 0.597912 | -1.67249 |
| Tik1              | NM_172664          | 0.000530558 | 0.597814 | -1.67276 |
| Slco5a1           | NM_172841          | 0.000229109 | 0.597494 | -1.67366 |
| Nynrin            | NM_001040072       | 1.23E-06    | 0.597354 | -1.67405 |
| Grasp             | NM_019518          | 0.000603762 | 0.597269 | -1.67429 |
| Cst3              | NM_009976          | 6.01E-05    | 0.596715 | -1.67584 |
| Abcd3             | ENSMUST00000029770 | 0.000127263 | 0.596362 | -1.67684 |
| Rsb1              | NM_172684          | 1.27E-06    | 0.59576  | -1.67853 |
| Rbpj              | NM_009035          | 6.14E-06    | 0.59549  | -1.67929 |
| Glul              | NM_008131          | 5.98E-07    | 0.595299 | -1.67983 |
| Snx17             | NM_153680          | 2.71E-06    | 0.59524  | -1.67999 |
| Bnc2              | NM_172870          | 1.09E-06    | 0.59512  | -1.68033 |
| 2210011C24Rik     | ENSMUST00000056686 | 2.92E-06    | 0.595034 | -1.68058 |
| Sfrs3             | NM_013663          | 1.67E-06    | 0.594769 | -1.68132 |
| Dock5             | NM_177780          | 9.25E-05    | 0.594655 | -1.68165 |
| Stk38             | NM_134115          | 0.000270914 | 0.594327 | -1.68257 |
| Hist1h4d          | NM_175654          | 2.41E-05    | 0.59396  | -1.68362 |
| Atad2b            | NM_001099628       | 7.29E-05    | 0.593825 | -1.684   |
| Lrrc8b            | NM_001033550       | 1.82E-08    | 0.593647 | -1.6845  |
| Alg1              | NM_145362          | 3.13E-05    | 0.593504 | -1.68491 |

|           |                    |             |          |          |
|-----------|--------------------|-------------|----------|----------|
| Hist1h2ba | NM_175663          | 0.000150945 | 0.593056 | -1.68618 |
| Fgf10     | NM_008002          | 0.000332524 | 0.592934 | -1.68653 |
| Tspan17   | NM_028841          | 0.000284397 | 0.592557 | -1.6876  |
| Gpa33     | NM_021610          | 0.000117896 | 0.592392 | -1.68807 |
| Mtss1     | NM_001146180       | 1.80E-05    | 0.592273 | -1.68841 |
| Tmem41b   | NM_153525          | 5.56E-05    | 0.592269 | -1.68842 |
| Spats2    | NM_139140          | 7.89E-07    | 0.592254 | -1.68846 |
| Dcbld2    | NM_028523          | 3.28E-06    | 0.59222  | -1.68856 |
| Asap2     | NM_001135192       | 0.000207879 | 0.591102 | -1.69176 |
| Peg10     | NM_130877          | 7.91E-09    | 0.591077 | -1.69183 |
| Sema6c    | NM_011351          | 1.60E-07    | 0.590948 | -1.6922  |
| Uchl1     | NM_011670          | 9.92E-05    | 0.59085  | -1.69248 |
| Mapt      | NM_001038609       | 1.59E-06    | 0.590806 | -1.6926  |
| Terf1     | NM_009352          | 7.52E-07    | 0.590501 | -1.69348 |
| Mir329    | NR_029762          | 8.69E-05    | 0.590068 | -1.69472 |
| Fiz1      | NM_011813          | 8.82E-05    | 0.5894   | -1.69664 |
| Ankrd28   | NM_001024604       | 1.01E-05    | 0.5886   | -1.69895 |
| Setd1b    | ENSMUST00000100731 | 0.000240928 | 0.588443 | -1.6994  |
| Igsf21    | NM_198610          | 9.15E-07    | 0.588364 | -1.69963 |
| Agtrap    | NM_009642          | 3.00E-06    | 0.588199 | -1.7001  |
| Lefty2    | NM_177099          | 5.84E-05    | 0.588192 | -1.70012 |
| Ccl25     | NM_009138          | 0.00094598  | 0.587933 | -1.70087 |
| Polr3gl   | NM_027241          | 8.69E-05    | 0.587825 | -1.70119 |
| Robo4     | NM_028783          | 5.96E-05    | 0.587766 | -1.70136 |
| Ak3l1     | NM_001177602       | 1.50E-05    | 0.587628 | -1.70176 |
| Scpep1    | NM_029023          | 0.000300277 | 0.58755  | -1.70198 |
| Plekhg5   | NM_001004156       | 1.07E-10    | 0.587448 | -1.70228 |
| Syce2     | NM_001168246       | 6.66E-06    | 0.58689  | -1.7039  |
| Gtsf1l    | NM_026630          | 3.58E-05    | 0.585088 | -1.70914 |
| Rufy3     | NM_027530          | 2.90E-05    | 0.584807 | -1.70996 |
| Atp8b2    | NM_001081182       | 3.55E-07    | 0.584662 | -1.71039 |
| Mir134    | NR_029548          | 8.49E-05    | 0.584191 | -1.71177 |
| Lck       | NM_010693          | 5.02E-07    | 0.583544 | -1.71367 |
| Grhl2     | NM_026496          | 1.10E-06    | 0.583526 | -1.71372 |
| Slc38a5   | NM_172479          | 2.55E-05    | 0.582837 | -1.71574 |
| Lrrc2     | NM_028838          | 0.000426544 | 0.582127 | -1.71784 |
| Cobl      | NM_172496          | 9.78E-06    | 0.582011 | -1.71818 |
| Dnajb14   | NM_001033155       | 8.36E-06    | 0.581968 | -1.71831 |
| Zic3      | NM_009575          | 6.19E-08    | 0.581847 | -1.71867 |
| Wfdc2     | NM_026323          | 7.34E-05    | 0.581466 | -1.71979 |
| Snx10     | NM_028035          | 3.36E-07    | 0.580913 | -1.72143 |
| Dennd5b   | NM_177192          | 4.34E-06    | 0.580684 | -1.72211 |
| Stc1      | NM_009285          | 6.76E-07    | 0.580516 | -1.72261 |

|               |                   |             |          |          |
|---------------|-------------------|-------------|----------|----------|
| Csrnp1        | NM_153287         | 4.57E-06    | 0.58016  | -1.72366 |
| Manba         | NM_027288         | 1.01E-07    | 0.580048 | -1.72399 |
| Rtn4          | NM_194054         | 3.14E-10    | 0.579967 | -1.72424 |
| Atp10a        | NM_009728         | 5.88E-06    | 0.579882 | -1.72449 |
| Bend5         | NM_026279         | 5.65E-05    | 0.579097 | -1.72683 |
| Tmem231       | NM_001033321      | 3.59E-06    | 0.579037 | -1.72701 |
| Sat2          | NM_026991         | 8.94E-06    | 0.578106 | -1.72979 |
| Wtap          | NM_001113533      | 1.03E-06    | 0.577952 | -1.73025 |
| Sod2          | NM_013671         | 1.24E-05    | 0.577743 | -1.73087 |
| Kdm6a         | NM_009483         | 2.78E-05    | 0.577647 | -1.73116 |
| Epcam         | NM_008532         | 1.17E-06    | 0.577315 | -1.73216 |
| Sipa1l1       | NM_001167983      | 5.56E-05    | 0.576577 | -1.73437 |
| E2f2          | NM_177733         | 9.60E-07    | 0.576555 | -1.73444 |
| Ier2          | NM_010499         | 1.74E-05    | 0.576308 | -1.73518 |
| Elavl2        | NM_207685         | 2.23E-08    | 0.576134 | -1.73571 |
| Ctsc          | NM_009982         | 5.34E-05    | 0.575434 | -1.73782 |
|               | 9-三月 NM_001033262 | 3.00E-05    | 0.574293 | -1.74127 |
| Optn          | NM_181848         | 0.000143744 | 0.573349 | -1.74414 |
| Fbxo30        | NM_027968         | 9.53E-07    | 0.573199 | -1.7446  |
| Gm340         | AK145489          | 6.75E-05    | 0.573071 | -1.74498 |
| Zfp516        | NM_183033         | 4.13E-06    | 0.573043 | -1.74507 |
| Cyb5r1        | NM_028057         | 2.24E-05    | 0.572924 | -1.74543 |
| Lfng          | NM_008494         | 7.12E-06    | 0.572744 | -1.74598 |
| Plod1         | NM_011122         | 6.54E-06    | 0.57255  | -1.74657 |
| Chordc1       | NM_025844         | 0.000171937 | 0.572484 | -1.74677 |
| Dpp4          | NM_010074         | 1.04E-07    | 0.571875 | -1.74863 |
| Ppp1r15b      | NM_133819         | 1.51E-05    | 0.571739 | -1.74905 |
| Cntfr         | NM_016673         | 1.89E-07    | 0.571643 | -1.74935 |
| Rsph1         | NM_025290         | 7.42E-05    | 0.57153  | -1.74969 |
| Dclk2         | NM_027539         | 3.21E-05    | 0.571309 | -1.75036 |
| D930048N14Rik | NR_027958         | 2.73E-05    | 0.571279 | -1.75046 |
| Clgn          | NM_009904         | 3.01E-06    | 0.570351 | -1.75331 |
| Rcn1          | NM_009037         | 7.00E-08    | 0.570185 | -1.75382 |
| Auts2         | NM_177047         | 7.67E-07    | 0.570072 | -1.75416 |
| Ly75          | NM_013825         | 1.87E-07    | 0.570032 | -1.75429 |
| Mipol1        | NM_001164370      | 2.16E-06    | 0.569678 | -1.75538 |
| Lgals3        | NM_001145953      | 0.000218675 | 0.569262 | -1.75666 |
| Gabarapl2     | NM_026693         | 0.000154308 | 0.569187 | -1.75689 |
| Oxr1          | NM_001130166      | 1.35E-06    | 0.567972 | -1.76065 |
| Cry1          | NM_007771         | 1.76E-09    | 0.567821 | -1.76112 |
| Usp54         | NM_030180         | 3.03E-07    | 0.567636 | -1.76169 |
| Gtf2h1        | NM_008186         | 7.35E-06    | 0.566532 | -1.76513 |
| H2-M5         | NM_001115075      | 1.42E-05    | 0.566393 | -1.76556 |

|               |              |             |          |          |
|---------------|--------------|-------------|----------|----------|
| Oas1g         | NM_011852    | 6.12E-07    | 0.56638  | -1.7656  |
| Rnd3          | NM_028810    | 8.49E-07    | 0.566268 | -1.76595 |
| Il13ra1       | NM_133990    | 6.75E-05    | 0.566015 | -1.76674 |
| Illdr1        | NM_134109    | 1.89E-07    | 0.564889 | -1.77026 |
| Zfp317        | NM_172918    | 1.03E-05    | 0.564486 | -1.77152 |
| Plcd1         | NM_019676    | 1.38E-08    | 0.563911 | -1.77333 |
| Gys1          | NM_030678    | 4.09E-05    | 0.563825 | -1.7736  |
| Sigmar1       | NM_011014    | 5.39E-05    | 0.563619 | -1.77425 |
| Zswim6        | NM_145456    | 6.24E-06    | 0.563388 | -1.77498 |
| Slc1a5        | NM_009201    | 6.15E-06    | 0.563379 | -1.775   |
| Chchd10       | NM_175329    | 1.01E-05    | 0.562875 | -1.77659 |
| Chrm4         | NM_007699    | 2.97E-06    | 0.562221 | -1.77866 |
| Aldh1b1       | NM_028270    | 2.95E-05    | 0.561755 | -1.78014 |
| 2900011O08Rik | BC022741     | 3.30E-07    | 0.561221 | -1.78183 |
| BC032203      | NM_001100452 | 6.33E-08    | 0.560723 | -1.78341 |
| Tesk2         | NM_146151    | 8.64E-07    | 0.560472 | -1.78421 |
| Colec12       | NM_130449    | 3.76E-05    | 0.559857 | -1.78617 |
| Hn1           | NM_008258    | 1.09E-06    | 0.559282 | -1.78801 |
| Cdk17         | NM_146239    | 2.92E-06    | 0.5582   | -1.79147 |
| Lonrf2        | NM_001029878 | 1.69E-05    | 0.557596 | -1.79341 |
| Tceal8        | NM_001168578 | 0.000420721 | 0.557559 | -1.79353 |
| L1cam         | NM_008478    | 2.39E-05    | 0.556136 | -1.79812 |
| Mllt11        | NM_019914    | 1.61E-07    | 0.555791 | -1.79924 |
| Sema3e        | NM_011348    | 2.72E-08    | 0.555589 | -1.79989 |
| Tubb2a        | NM_009450    | 1.55E-06    | 0.554957 | -1.80194 |
| Ddx3x         | NM_010028    | 1.99E-07    | 0.554613 | -1.80306 |
| Axin2         | NM_015732    | 3.36E-06    | 0.55461  | -1.80307 |
| Mier3         | NM_172593    | 4.65E-05    | 0.553145 | -1.80784 |
| Utf1          | NM_009482    | 2.39E-05    | 0.552997 | -1.80833 |
| Krt42         | NM_212483    | 3.87E-06    | 0.552744 | -1.80915 |
| Grik3         | NM_001081097 | 1.98E-07    | 0.552092 | -1.81129 |
| Khynyn        | NM_027143    | 1.25E-06    | 0.55204  | -1.81146 |
| Plekha2       | NM_031257    | 0.000473475 | 0.551149 | -1.81439 |
| Dcaf12l1      | NM_178739    | 3.03E-06    | 0.550964 | -1.815   |
| Prss8         | NM_133351    | 8.13E-07    | 0.550752 | -1.8157  |
| Uba6          | NM_172712    | 7.11E-05    | 0.550589 | -1.81624 |
| Itga9         | NM_133721    | 5.28E-07    | 0.550275 | -1.81727 |
| Tubb2b        | NM_023716    | 6.60E-06    | 0.550211 | -1.81748 |
| Dsg2          | NM_007883    | 0.000546368 | 0.549981 | -1.81825 |
| Mga           | NM_013720    | 9.95E-05    | 0.54997  | -1.81828 |
| Mt2           | NM_008630    | 0.000390583 | 0.549688 | -1.81921 |
| Kit           | NM_001122733 | 1.18E-05    | 0.549452 | -1.82    |
| Cmtm7         | NM_133978    | 4.09E-06    | 0.549269 | -1.8206  |

|               |                    |             |          |          |
|---------------|--------------------|-------------|----------|----------|
| Slc28a1       | NM_001004184       | 1.04E-05    | 0.548855 | -1.82197 |
| Smg7          | NM_001160257       | 0.000118148 | 0.548739 | -1.82236 |
| Zdhhc15       | NM_175358          | 7.44E-05    | 0.548564 | -1.82294 |
| Fam63a        | BC094388           | 6.45E-06    | 0.54842  | -1.82342 |
| Gm10245       | ENSMUST00000090285 | 2.18E-06    | 0.548211 | -1.82411 |
| Ndrp2         | NM_013864          | 5.60E-05    | 0.548144 | -1.82434 |
| Txnrd3        | NM_153162          | 9.60E-06    | 0.54806  | -1.82462 |
| Fzd5          | NM_022721          | 5.76E-08    | 0.547407 | -1.8268  |
| Cdhr1         | NM_130878          | 8.29E-07    | 0.547274 | -1.82724 |
| Klf13         | NM_021366          | 4.01E-07    | 0.546685 | -1.82921 |
| Fstl1         | NM_008047          | 1.52E-06    | 0.546674 | -1.82924 |
| Atoh1         | BC010820           | 0.000229229 | 0.545874 | -1.83192 |
| Gpd2          | NM_010274          | 1.15E-06    | 0.54582  | -1.83211 |
| Gm10047       | ENSMUST00000069263 | 0.000267027 | 0.545657 | -1.83265 |
| 6030429G01Rik | BC150983           | 3.82E-05    | 0.545466 | -1.83329 |
| Prune         | NM_173347          | 9.64E-05    | 0.545113 | -1.83448 |
| Hist2h2bb     | NM_175666          | 1.02E-05    | 0.544137 | -1.83777 |
| Gli1          | NM_010296          | 5.76E-07    | 0.542933 | -1.84185 |
| Cbln1         | NM_019626          | 8.22E-05    | 0.542918 | -1.8419  |
| Ttyh1         | NM_021324          | 9.41E-09    | 0.542242 | -1.8442  |
| Erf           | NM_010155          | 3.17E-10    | 0.542042 | -1.84487 |
| Zmym5         | NM_144842          | 4.15E-06    | 0.541451 | -1.84689 |
| Rbm14         | NM_019869          | 4.63E-06    | 0.540916 | -1.84872 |
| Hspbap1       | NM_175111          | 1.01E-06    | 0.540419 | -1.85042 |
| Kdm4c         | NM_144787          | 3.85E-08    | 0.539523 | -1.85349 |
| Mov10         | NM_001163440       | 9.04E-10    | 0.539164 | -1.85472 |
| Cnn3          | NM_028044          | 4.46E-05    | 0.538629 | -1.85657 |
| Pde9a         | NM_008804          | 4.84E-06    | 0.538445 | -1.8572  |
| Mep1b         | NM_008586          | 1.93E-07    | 0.538003 | -1.85872 |
| Slc1a3        | NM_148938          | 3.76E-08    | 0.537063 | -1.86198 |
| Zfy1          | NM_009570          | 8.87E-05    | 0.536804 | -1.86288 |
| She           | NM_172530          | 2.74E-07    | 0.536339 | -1.86449 |
| Tmem106a      | NM_144830          | 3.63E-06    | 0.535986 | -1.86572 |
| Aff1          | NM_001080798       | 2.47E-05    | 0.535931 | -1.86591 |
| Ngfr          | NM_033217          | 3.35E-07    | 0.534573 | -1.87065 |
| Pcgf2         | NM_009545          | 5.63E-05    | 0.534534 | -1.87079 |
| Tmem180       | NM_029186          | 1.71E-05    | 0.53448  | -1.87098 |
| Nuak1         | NM_001004363       | 4.48E-05    | 0.534294 | -1.87163 |
| Usp28         | NM_175482          | 5.55E-10    | 0.533789 | -1.8734  |
| Sumo1         | NM_009460          | 0.000126107 | 0.53345  | -1.87459 |
| Nav1          | NM_173437          | 6.00E-08    | 0.533204 | -1.87545 |
| Irf9          | NM_001159417       | 3.25E-06    | 0.533123 | -1.87574 |
| Tmem28        | NM_001081283       | 6.93E-06    | 0.532728 | -1.87713 |



|               |                    |             |          |          |
|---------------|--------------------|-------------|----------|----------|
| Ints6         | NM_008715          | 4.81E-08    | 0.532439 | -1.87815 |
| Nfkbid        | NM_172142          | 3.91E-06    | 0.532217 | -1.87893 |
| Baz2b         | NM_001001182       | 5.39E-06    | 0.531782 | -1.88047 |
| D14Ertd668e   | NM_001164323       | 5.91E-05    | 0.529103 | -1.88999 |
| Adm2          | NM_182928          | 2.74E-07    | 0.529048 | -1.89019 |
| Slc16a1       | NM_009196          | 2.12E-08    | 0.527879 | -1.89437 |
| Sars          | NM_011319          | 4.46E-07    | 0.527225 | -1.89672 |
| Arhgap29      | NM_172525          | 6.50E-07    | 0.526116 | -1.90072 |
| Anxa7         | NM_009674          | 8.44E-06    | 0.525673 | -1.90232 |
| Slc16a6       | NM_001029842       | 1.46E-07    | 0.524994 | -1.90478 |
| Usp26         | NM_031388          | 3.86E-06    | 0.524927 | -1.90503 |
| Ncoa6         | NM_019825          | 2.44E-05    | 0.52461  | -1.90618 |
| Pnma2         | NM_175498          | 1.71E-06    | 0.524425 | -1.90685 |
| Tbx3          | NM_011535          | 1.03E-07    | 0.523103 | -1.91167 |
| Slc37a1       | NM_153062          | 5.97E-08    | 0.523051 | -1.91186 |
| Stc2          | NM_011491          | 2.87E-06    | 0.522984 | -1.9121  |
| Slc30a2       | NM_001039677       | 6.00E-07    | 0.522774 | -1.91287 |
| Arhgef2       | NM_008487          | 8.32E-07    | 0.522707 | -1.91312 |
| Mthfr         | NM_001161798       | 6.00E-06    | 0.522208 | -1.91494 |
| Trps1         | NM_032000          | 1.04E-07    | 0.522012 | -1.91567 |
| Pla2g4e       | NM_177845          | 2.26E-08    | 0.521597 | -1.91719 |
| Etv5          | NM_023794          | 2.15E-10    | 0.521549 | -1.91737 |
| Nkx6-3        | NM_029002          | 1.14E-07    | 0.52137  | -1.91803 |
| Ube2g1        | NM_025985          | 1.09E-05    | 0.521213 | -1.9186  |
| Pck2          | NM_028994          | 1.18E-06    | 0.521036 | -1.91925 |
| Ddx3y         | NM_012008          | 2.85E-05    | 0.52031  | -1.92193 |
| Mtfr1         | NM_026182          | 1.19E-06    | 0.52026  | -1.92212 |
| Gabarapl1     | NM_020590          | 0.000345124 | 0.519819 | -1.92374 |
| Smarca1       | NM_053123          | 0.000986622 | 0.519674 | -1.92428 |
| Fzd7          | NM_008057          | 1.54E-06    | 0.51909  | -1.92645 |
| Vangl1        | NM_177545          | 2.56E-07    | 0.518277 | -1.92947 |
| Gm13939       | NR_033473          | 0.000788365 | 0.518168 | -1.92987 |
| Gm6762        | NM_001167603       | 1.78E-06    | 0.517286 | -1.93317 |
| Tead4         | NM_011567          | 5.93E-10    | 0.516843 | -1.93482 |
| Spire2        | NM_172287          | 2.00E-06    | 0.516705 | -1.93534 |
| Ralgps2       | NM_001159965       | 3.72E-06    | 0.516603 | -1.93572 |
| Lgr4          | NM_172671          | 1.04E-06    | 0.516435 | -1.93635 |
| Inhbb         | NM_008381          | 6.14E-06    | 0.516006 | -1.93796 |
| Enah          | NM_010135          | 1.03E-06    | 0.515888 | -1.93841 |
| Dnajc21       | NM_030046          | 7.95E-07    | 0.515738 | -1.93897 |
| Rmnd5b        | NM_025346          | 2.57E-05    | 0.51553  | -1.93975 |
| 2810416G20Rik | ENSMUST00000057404 | 1.23E-05    | 0.514677 | -1.94297 |
| Acap1         | NM_153788          | 9.23E-08    | 0.514198 | -1.94478 |

|               |                    |             |          |          |
|---------------|--------------------|-------------|----------|----------|
| Dnajc22       | NM_176835          | 2.57E-06    | 0.513514 | -1.94737 |
| Nudt4         | NM_027722          | 6.63E-07    | 0.511757 | -1.95405 |
| Prr19         | BC147639           | 1.54E-05    | 0.511678 | -1.95436 |
| Plaur         | NM_011113          | 2.39E-05    | 0.510781 | -1.95779 |
| Cpne3         | NM_027769          | 1.63E-05    | 0.510766 | -1.95784 |
| Atf4          | NM_009716          | 4.43E-06    | 0.510266 | -1.95976 |
| Lima1         | NM_001113545       | 1.08E-08    | 0.509619 | -1.96225 |
| Fjx1          | NM_010218          | 1.51E-06    | 0.50958  | -1.9624  |
| B3gnt2        | NM_016888          | 4.95E-06    | 0.509288 | -1.96353 |
| Bcar3         | NM_013867          | 5.01E-07    | 0.509287 | -1.96353 |
| 2610318N02Rik | BC039993           | 4.01E-06    | 0.508441 | -1.9668  |
| Fbxo27        | NM_207238          | 3.63E-06    | 0.507959 | -1.96866 |
| 4930583H14Rik | NR_028121          | 0.000530925 | 0.507707 | -1.96964 |
| Elovl7        | NM_029001          | 9.60E-06    | 0.507248 | -1.97142 |
| Chac1         | NM_026929          | 4.57E-05    | 0.506127 | -1.97579 |
| 2200002K05Rik | BC055786           | 0.00010085  | 0.505493 | -1.97827 |
| Sgk1          | NM_001161845       | 1.39E-06    | 0.505455 | -1.97842 |
| Gnpnat1       | NM_019425          | 1.62E-05    | 0.504285 | -1.98301 |
| Pdpm          | NM_010329          | 1.52E-07    | 0.504257 | -1.98312 |
| Ankrd45       | NM_028664          | 1.11E-06    | 0.504225 | -1.98324 |
| Hist1h4f      | NM_175655          | 6.05E-06    | 0.501915 | -1.99237 |
| Tdrd12        | NM_028034          | 2.33E-06    | 0.501759 | -1.99299 |
| 2310014H01Rik | NM_001146711       | 6.69E-07    | 0.501637 | -1.99347 |
| Coch          | NM_007728          | 1.14E-06    | 0.50134  | -1.99465 |
| Gm10522       | ENSMUST00000097468 | 6.87E-05    | 0.501293 | -1.99484 |
| Serpinb1a     | NM_025429          | 1.01E-06    | 0.500778 | -1.99689 |
| Ldlr          | NM_010700          | 1.76E-06    | 0.500455 | -1.99818 |
| Pvr           | NM_027514          | 2.65E-05    | 0.499489 | -2.00205 |
| Nrp2          | NM_001077403       | 1.98E-06    | 0.498836 | -2.00467 |
| Trim2         | NM_030706          | 8.79E-07    | 0.497785 | -2.0089  |
| Camkv         | NM_145621          | 1.99E-05    | 0.497193 | -2.01129 |
| Yars          | NM_134151          | 4.76E-08    | 0.496848 | -2.01269 |
| AU018091      | NM_001004153       | 2.01E-05    | 0.496257 | -2.01508 |
| Six1          | NM_009189          | 2.58E-07    | 0.495849 | -2.01674 |
| Hbegf         | NM_010415          | 2.83E-07    | 0.495069 | -2.01992 |
| Nufip2        | NM_001024205       | 6.89E-07    | 0.494882 | -2.02068 |
| Rcn3          | NM_026555          | 3.30E-07    | 0.494785 | -2.02108 |
| Ttc39b        | NM_027238          | 2.56E-07    | 0.494669 | -2.02155 |
| Rreb1         | NR_033218          | 5.59E-10    | 0.493498 | -2.02635 |
| Anp32-ps      | AY702092           | 9.52E-05    | 0.493489 | -2.02639 |
| Alg13         | NM_026247          | 1.01E-06    | 0.492987 | -2.02845 |
| Lix1l         | NM_001163170       | 2.52E-07    | 0.492312 | -2.03123 |
| Acot9         | NM_019736          | 2.69E-07    | 0.491704 | -2.03374 |

|               |                 |             |          |          |
|---------------|-----------------|-------------|----------|----------|
| Jarid2        | NM_021878       | 7.16E-07    | 0.490913 | -2.03702 |
| Herc4         | NM_026101       | 2.33E-07    | 0.490495 | -2.03876 |
| Armcx1        | NM_001166377    | 3.72E-08    | 0.489749 | -2.04186 |
| Nampt         | NM_021524       | 1.41E-06    | 0.489657 | -2.04224 |
| Ccrn4l        | NM_009834       | 1.42E-05    | 0.488683 | -2.04632 |
| Fam169b       | NM_001013811    | 1.72E-06    | 0.488109 | -2.04872 |
| Aplp1         | NM_007467       | 4.02E-06    | 0.487389 | -2.05175 |
| Lpar1         | NM_010336       | 6.36E-08    | 0.48733  | -2.052   |
| Zfp459        | NM_177811       | 0.000652152 | 0.487173 | -2.05266 |
| Ebp           | NM_007898       | 2.17E-06    | 0.487065 | -2.05312 |
| Rpp38         | NM_001013376    | 0.000681395 | 0.48667  | -2.05478 |
| Sap30         | NM_021788       | 0.000518414 | 0.48646  | -2.05567 |
| Trib1         | NM_144549       | 1.44E-05    | 0.486371 | -2.05604 |
| Phlpp1        | NM_133821       | 1.61E-07    | 0.486307 | -2.05631 |
| Mpped2        | NM_029837       | 1.93E-07    | 0.48627  | -2.05647 |
| Dlgap3        | NM_198618       | 3.46E-05    | 0.486213 | -2.05671 |
| Ggt1          | NM_008116       | 2.02E-07    | 0.485484 | -2.0598  |
| Gprc5a        | NM_181444       | 0.000132668 | 0.485362 | -2.06032 |
| Sh3gl2        | NM_019535       | 6.65E-07    | 0.484756 | -2.06289 |
| Aldoc         | NM_009657       | 7.59E-05    | 0.484359 | -2.06458 |
| Pcgf5         | NM_029508       | 8.22E-07    | 0.484179 | -2.06535 |
| Baz1a         | NM_013815       | 1.80E-07    | 0.48414  | -2.06552 |
| Lrrn4         | NM_177303       | 1.21E-06    | 0.48383  | -2.06684 |
| Zfp710        | NM_175433       | 3.12E-08    | 0.483718 | -2.06732 |
| Lactb2        | NM_145381       | 1.27E-06    | 0.483376 | -2.06878 |
| Lphn2         | NM_001081298    | 7.78E-05    | 0.482818 | -2.07118 |
| Pax6          | NM_013627       | 6.73E-06    | 0.482642 | -2.07193 |
| G3bp2         | NM_011816       | 4.92E-07    | 0.481529 | -2.07672 |
| Fbxo44        | NM_173401       | 1.86E-07    | 0.480921 | -2.07934 |
| Tomm5         | NM_001099675    | 0.000106156 | 0.480416 | -2.08153 |
| Mirg          | NR_028265       | 1.11E-05    | 0.480301 | -2.08203 |
| Mir377        | NR_029878       | 3.42E-05    | 0.47822  | -2.09109 |
| Acp5          | NM_001102404    | 9.35E-07    | 0.476783 | -2.09739 |
| Arid5b        | NM_023598       | 4.50E-08    | 0.476458 | -2.09882 |
| Pou2f3        | NM_011139       | 2.76E-07    | 0.476199 | -2.09996 |
| Zbtb45        | NM_001024699    | 2.84E-07    | 0.475556 | -2.1028  |
| Ceacam1       | NM_001039185    | 1.84E-05    | 0.475117 | -2.10474 |
| Pdgfc         | NM_019971       | 7.42E-06    | 0.473833 | -2.11045 |
| Zic5          | NM_022987       | 1.56E-06    | 0.473755 | -2.1108  |
| 9030420J04Rik | BC137891        | 9.61E-05    | 0.473236 | -2.11311 |
|               | 11-三月 NM_177597 | 3.06E-05    | 0.472409 | -2.11681 |
| Ina           | NM_146100       | 1.22E-06    | 0.472405 | -2.11683 |
| Cpsf4l        | NM_026682       | 1.61E-07    | 0.472319 | -2.11721 |

|               |                    |          |          |          |
|---------------|--------------------|----------|----------|----------|
| Tmem8         | NM_021793          | 2.68E-06 | 0.472054 | -2.1184  |
| Tor1aip2      | NM_172843          | 3.39E-07 | 0.471952 | -2.11886 |
| Sox4          | NM_009238          | 4.08E-05 | 0.471838 | -2.11937 |
| Mll3          | NM_001081383       | 1.66E-07 | 0.470363 | -2.12602 |
| Bcl6b         | NM_007528          | 3.97E-09 | 0.469852 | -2.12833 |
| Fgd1          | NM_008001          | 8.70E-09 | 0.469636 | -2.12931 |
| Pla2g10       | NM_011987          | 3.45E-06 | 0.469479 | -2.13002 |
| Usp3          | NM_144937          | 5.21E-07 | 0.46895  | -2.13242 |
| Rai14         | NM_001166408       | 2.79E-08 | 0.468742 | -2.13337 |
| Scd2          | NM_009128          | 1.60E-08 | 0.467804 | -2.13765 |
| Gli2          | NM_001081125       | 1.15E-09 | 0.467637 | -2.13841 |
| Ptch2         | NM_008958          | 1.78E-08 | 0.467305 | -2.13993 |
| Bnip3         | NM_009760          | 1.58E-07 | 0.466627 | -2.14304 |
| Gm10858       | ENSMUST00000100438 | 1.58E-05 | 0.466451 | -2.14385 |
| Dmrt1         | NM_015826          | 2.29E-09 | 0.466286 | -2.14461 |
| Lrrc34        | NM_027941          | 7.15E-05 | 0.465014 | -2.15047 |
| Mapk11        | NM_011161          | 5.79E-08 | 0.464751 | -2.15169 |
| 1110021L09Rik | NM_183116          | 1.23E-08 | 0.463451 | -2.15773 |
| Slc46a3       | NM_027872          | 1.55E-06 | 0.462955 | -2.16004 |
| Grin1         | NM_008169          | 2.50E-07 | 0.462149 | -2.1638  |
| Six4          | NM_011382          | 7.63E-09 | 0.461888 | -2.16503 |
| Ubqln2        | NM_018798          | 1.12E-06 | 0.461793 | -2.16547 |
| Morf4l2       | NM_019768          | 3.49E-06 | 0.461612 | -2.16632 |
| Tagln3        | NM_019754          | 4.31E-08 | 0.461522 | -2.16675 |
| Lrrc8d        | NM_178701          | 5.97E-08 | 0.461075 | -2.16885 |
| Rnf165        | NM_001164504       | 2.20E-07 | 0.46106  | -2.16891 |
| B3galnt1      | NM_020026          | 1.03E-06 | 0.460763 | -2.17032 |
| Zfp57         | NM_001013745       | 1.22E-06 | 0.460588 | -2.17114 |
| Mex3a         | NM_001029890       | 2.62E-08 | 0.459828 | -2.17472 |
| Tgfb1         | NM_011577          | 1.06E-08 | 0.459235 | -2.17754 |
| Foxo4         | NM_018789          | 7.28E-09 | 0.459067 | -2.17833 |
| Gpt2          | NM_173866          | 4.48E-08 | 0.459006 | -2.17862 |
| Rnf125        | NM_026301          | 1.06E-06 | 0.458104 | -2.18291 |
| Phf15         | NM_199299          | 3.99E-07 | 0.457759 | -2.18456 |
| Accsl         | NM_001033452       | 2.33E-06 | 0.457692 | -2.18488 |
| Rbpms         | NM_019733          | 1.44E-08 | 0.457088 | -2.18776 |
| Fbxo15        | NM_015798          | 4.67E-07 | 0.456749 | -2.18938 |
| Cables1       | NM_001146287       | 9.77E-09 | 0.456353 | -2.19129 |
| Mir487b       | NR_030271          | 1.31E-05 | 0.456297 | -2.19155 |
| Ier3          | NM_133662          | 5.53E-05 | 0.456236 | -2.19185 |
| Camk2n1       | NM_025451          | 5.62E-07 | 0.454931 | -2.19814 |
| 2410004A20Rik | NM_025890          | 4.93E-09 | 0.454267 | -2.20135 |
| Mtap1a        | NM_032393          | 3.07E-08 | 0.452134 | -2.21173 |

|               |              |             |          |          |
|---------------|--------------|-------------|----------|----------|
| Fermt2        | NM_146054    | 2.41E-09    | 0.451686 | -2.21393 |
| Slc17a9       | NM_183161    | 1.01E-06    | 0.451168 | -2.21647 |
| Ptpn12        | NM_011203    | 4.28E-07    | 0.449844 | -2.22299 |
| Mtap1b        | NM_008634    | 1.09E-07    | 0.449731 | -2.22355 |
| Dnmt3l        | NM_019448    | 1.53E-08    | 0.449387 | -2.22525 |
| B4galt6       | NM_019737    | 1.68E-08    | 0.448447 | -2.22992 |
| Dusp6         | NM_026268    | 4.10E-09    | 0.447891 | -2.23268 |
| Irf1          | NM_008390    | 4.06E-07    | 0.447867 | -2.23281 |
| Glt1d1        | NM_177005    | 1.61E-08    | 0.446924 | -2.23752 |
| Kat2b         | NM_020005    | 1.47E-11    | 0.446403 | -2.24013 |
| Nupr1         | NM_019738    | 5.28E-06    | 0.445832 | -2.243   |
| Kif23         | NM_024245    | 5.59E-08    | 0.445735 | -2.24349 |
| Smagp         | NM_174992    | 3.82E-08    | 0.445588 | -2.24423 |
| Mest          | NM_008590    | 0.000344828 | 0.441083 | -2.26715 |
| Apobec3       | NM_001160415 | 8.31E-07    | 0.439893 | -2.27328 |
| C330016O10Rik | NM_145974    | 4.83E-07    | 0.437002 | -2.28832 |
| Epb4.9        | NM_013514    | 8.39E-08    | 0.436905 | -2.28883 |
| Kank4         | NM_172872    | 2.58E-06    | 0.435355 | -2.29698 |
| Krt17         | NM_010663    | 5.16E-06    | 0.435106 | -2.29829 |
| Rasgrp1       | NM_011246    | 9.93E-09    | 0.435016 | -2.29876 |
| Zyg11a        | NM_001167936 | 5.31E-08    | 0.434818 | -2.29981 |
| Zp3           | NM_011776    | 2.41E-08    | 0.434217 | -2.303   |
| Pvrl2         | NM_008990    | 1.26E-08    | 0.433915 | -2.3046  |
| Nanog         | NM_028016    | 2.64E-07    | 0.43379  | -2.30526 |
| Slc1a4        | NM_018861    | 6.18E-07    | 0.433419 | -2.30723 |
| Foxr2         | NM_001034894 | 1.07E-07    | 0.430499 | -2.32289 |
| Tcfef         | NM_011549    | 1.08E-09    | 0.429288 | -2.32944 |
| Bdh2          | NM_001172055 | 9.52E-08    | 0.428689 | -2.33269 |
| Rhoc          | NM_007484    | 1.92E-07    | 0.428522 | -2.3336  |
| Gap43         | NM_008083    | 4.88E-06    | 0.428244 | -2.33512 |
| Lin28a        | NM_145833    | 3.68E-08    | 0.428095 | -2.33593 |
| Phf21a        | NM_001109691 | 1.56E-05    | 0.427696 | -2.33811 |
| Nr5a2         | NM_030676    | 5.18E-08    | 0.427414 | -2.33965 |
| Senp3         | NM_001163571 | 3.41E-07    | 0.427104 | -2.34135 |
| Stambpl1      | NM_029682    | 6.17E-07    | 0.426884 | -2.34256 |
| Myb           | NM_010848    | 3.08E-07    | 0.425698 | -2.34908 |
| Asf1a         | NM_025541    | 0.000138416 | 0.425124 | -2.35225 |
| Ppm1j         | NM_027982    | 1.28E-08    | 0.424271 | -2.35698 |
| Sall4         | NM_175303    | 2.92E-10    | 0.424065 | -2.35813 |
| Usp46         | NM_177561    | 2.46E-05    | 0.423154 | -2.3632  |
| Il6st         | NM_010560    | 2.67E-07    | 0.422687 | -2.36582 |
| Gfod1         | NM_001033399 | 2.62E-07    | 0.422147 | -2.36884 |
| Gadd45b       | NM_008655    | 3.86E-06    | 0.419249 | -2.38522 |

|               |              |          |          |          |
|---------------|--------------|----------|----------|----------|
| Adamts9       | NM_175314    | 1.36E-08 | 0.414915 | -2.41013 |
| 6330407J23Rik | NM_026138    | 1.25E-07 | 0.414116 | -2.41478 |
| Zfp518b       | NM_001081144 | 1.18E-05 | 0.412366 | -2.42503 |
| Gbx2          | NM_010262    | 4.63E-08 | 0.409753 | -2.4405  |
| Slc35f2       | NM_028060    | 4.12E-07 | 0.408417 | -2.44848 |
| Pcyt1b        | NM_211138    | 7.68E-09 | 0.408118 | -2.45027 |
| Mir539        | NR_030262    | 2.16E-05 | 0.40774  | -2.45254 |
| 2410137M14Rik | NM_029747    | 4.39E-10 | 0.407503 | -2.45397 |
| Emb           | NM_010330    | 3.41E-08 | 0.40706  | -2.45664 |
| Prr13         | NM_025385    | 8.08E-06 | 0.402364 | -2.48531 |
| Sulf1         | NM_172294    | 7.19E-08 | 0.402092 | -2.48699 |
| Fam169a       | NM_001100458 | 9.49E-07 | 0.401729 | -2.48924 |
| Porcn         | NM_016913    | 1.55E-08 | 0.401568 | -2.49024 |
| Nfatc4        | NM_023699    | 1.51E-07 | 0.400426 | -2.49734 |
| Gabbr1        | NM_019439    | 5.54E-08 | 0.399396 | -2.50378 |
| Pim1          | NM_008842    | 1.66E-05 | 0.396931 | -2.51933 |
| Slc27a2       | NM_011978    | 5.69E-08 | 0.396512 | -2.52199 |
| Cyp2s1        | NM_028775    | 6.87E-06 | 0.395724 | -2.52701 |
| Slc6a1        | NM_178703    | 1.81E-07 | 0.395592 | -2.52786 |
| Socs2         | NM_007706    | 2.73E-10 | 0.392887 | -2.54526 |
| Dusp27        | NM_001033344 | 1.65E-08 | 0.392763 | -2.54607 |
| Tuba4a        | NM_009447    | 2.82E-07 | 0.392236 | -2.54949 |
| Gm129         | BC132471     | 1.21E-06 | 0.391623 | -2.55348 |
| Klf8          | NM_173780    | 2.60E-09 | 0.391317 | -2.55547 |
| Ino80         | NM_026574    | 1.90E-08 | 0.39126  | -2.55585 |
| Rragd         | NM_027491    | 1.58E-07 | 0.382557 | -2.61399 |
| Zfp819        | NM_028913    | 2.91E-05 | 0.380787 | -2.62614 |
| Rasgrp2       | NM_011242    | 5.88E-06 | 0.380717 | -2.62662 |
| Tgfbi         | NM_009369    | 7.24E-09 | 0.378438 | -2.64244 |
| Ccnd1         | NM_007631    | 5.61E-12 | 0.378336 | -2.64315 |
| Atp1b1        | NM_009721    | 2.66E-07 | 0.378079 | -2.64495 |
| Eras          | NM_181548    | 3.79E-05 | 0.375947 | -2.65995 |
| Atp6v0a4      | NM_080467    | 4.84E-07 | 0.375645 | -2.66208 |
| Aldh18a1      | NM_019698    | 2.34E-09 | 0.374355 | -2.67126 |
| Satb1         | NM_009122    | 1.03E-07 | 0.37253  | -2.68435 |
| Snx9          | NM_025664    | 1.37E-08 | 0.371334 | -2.69299 |
| Nefl          | NM_010910    | 7.85E-07 | 0.370656 | -2.69792 |
| Snrpn         | NM_013670    | 3.38E-09 | 0.369505 | -2.70632 |
| Hspb6         | NM_001012401 | 2.47E-09 | 0.368215 | -2.7158  |
| Myadm         | NM_001093765 | 3.71E-07 | 0.365611 | -2.73515 |
| 8430410A17Rik | BC024401     | 7.98E-07 | 0.365254 | -2.73782 |
| Igf2bp2       | NM_183029    | 4.15E-08 | 0.360712 | -2.7723  |
| Sgk3          | NM_133220    | 8.47E-09 | 0.358988 | -2.78561 |

|           |              |          |          |          |
|-----------|--------------|----------|----------|----------|
| Mir382    | NR_029883    | 2.51E-06 | 0.357573 | -2.79663 |
| Zc3hav1   | NM_028421    | 4.74E-08 | 0.356842 | -2.80236 |
| Rragb     | NM_001004154 | 3.76E-06 | 0.355026 | -2.81669 |
| Hist1h2bb | NM_175664    | 1.21E-09 | 0.353447 | -2.82928 |
| Mical1    | NM_138315    | 4.67E-10 | 0.352882 | -2.83381 |
| Kdm3a     | NM_001038695 | 1.23E-08 | 0.341744 | -2.92616 |
| Trh       | NM_009426    | 9.98E-09 | 0.338959 | -2.95021 |
| Prss35    | NM_178738    | 1.48E-08 | 0.336363 | -2.97298 |
| Sall1     | NM_021390    | 4.05E-11 | 0.333665 | -2.99702 |
| Parp14    | NM_001039530 | 4.68E-08 | 0.333019 | -3.00283 |
| Ndrp1     | NM_008681    | 9.40E-09 | 0.330768 | -3.02327 |
| Gm98      | NM_001033481 | 2.66E-11 | 0.330206 | -3.02841 |
| Bcl3      | NM_033601    | 3.45E-07 | 0.329541 | -3.03453 |
| Cdc42ep5  | NM_021454    | 5.26E-05 | 0.328106 | -3.04779 |
| Gfpt2     | NM_013529    | 7.90E-07 | 0.326689 | -3.06102 |
| Eomes     | NM_010136    | 8.95E-08 | 0.324591 | -3.0808  |
| Tcl1      | NM_009337    | 2.04E-07 | 0.320467 | -3.12045 |
| F2rl1     | NM_007974    | 2.19E-09 | 0.315492 | -3.16965 |
| Notch4    | NM_010929    | 1.41E-10 | 0.313886 | -3.18587 |
| Etv1      | NM_007960    | 6.25E-07 | 0.312501 | -3.19999 |
| Lef1      | NM_010703    | 1.23E-10 | 0.307531 | -3.2517  |
| Tet2      | NM_001040400 | 2.19E-07 | 0.3067   | -3.26051 |
| Mycn      | NM_008709    | 1.37E-08 | 0.302623 | -3.30444 |
| Hpd1      | NM_146256    | 3.63E-07 | 0.296784 | -3.36945 |
| Grb7      | NM_010346    | 7.45E-08 | 0.296045 | -3.37787 |
| Enpp3     | NM_134005    | 2.10E-08 | 0.295921 | -3.37928 |
| Otx2      | NM_144841    | 3.26E-07 | 0.292793 | -3.41539 |
| Itga5     | NM_010577    | 2.43E-08 | 0.282619 | -3.53833 |
| Spp1      | NM_009263    | 3.34E-09 | 0.282029 | -3.54573 |
| Spry2     | NM_011897    | 4.34E-11 | 0.281634 | -3.55071 |
| Cdk6      | NM_009873    | 4.14E-10 | 0.26002  | -3.84585 |
| Fgf15     | NM_008003    | 3.34E-08 | 0.257262 | -3.88709 |
| Esrp1     | NM_194055    | 1.38E-07 | 0.256521 | -3.89831 |
| Slc15a1   | NM_053079    | 6.58E-11 | 0.247631 | -4.03827 |
| Slc6a15   | NM_175328    | 9.85E-09 | 0.246875 | -4.05064 |
| Ddx58     | NM_172689    | 1.90E-12 | 0.246396 | -4.05851 |
| Sfrp1     | NM_013834    | 1.23E-09 | 0.244876 | -4.0837  |
| Zfp428    | NM_146183    | 4.07E-08 | 0.24405  | -4.09753 |
| Bmp4      | NM_007554    | 1.55E-08 | 0.243492 | -4.10691 |
| Spry4     | NM_011898    | 4.55E-08 | 0.243002 | -4.11518 |
| Slc7a3    | NM_007515    | 3.78E-10 | 0.237093 | -4.21775 |
| Emp1      | NM_010128    | 1.56E-10 | 0.235333 | -4.24929 |
| Nt5e      | NM_011851    | 3.28E-10 | 0.234861 | -4.25784 |

|         |                    |          |          |          |
|---------|--------------------|----------|----------|----------|
| Zic2    | NM_009574          | 1.39E-09 | 0.219815 | -4.54928 |
| Fgf17   | NM_008004          | 3.49E-11 | 0.201798 | -4.95544 |
| Nr0b1   | NM_007430          | 3.63E-09 | 0.174366 | -5.73507 |
| Gm10664 | ENSMUST00000098718 | 9.64E-08 | 0.166797 | -5.99532 |
| Prdm14  | NM_001081209       | 1.04E-11 | 0.145011 | -6.89605 |



**Supplementary Table 4****Common\_MEF\_mES**

Sox17  
Tcfap2d  
Tcfap2b  
Rev1  
Pou3f3  
Ercc5  
Satb2  
2810022L02Rik  
Pax3  
Armc9  
Ptma  
Gbx2  
Dyrk3  
Nucks1  
Btg2  
Phlda3  
Lhx9  
chr1:157505465-157505522  
chr1:157505850-157505909  
Vamp4  
Slc19a2  
Lmx1a  
Ephx1  
Hlx1  
Tgfb2  
Prox1  
Gata3  
Plxdc2  
Bmi1  
BC061194  
Gad2  
Pax8  
Tubb2c  
Ntng2  
Ier5l  
5830434P21Rik  
C230093N12Rik  
Ak1  
Eng  
Lmx1b  
Lhx6  
Pdcl  
Lhx2  
Tbr1  
Gad1  
Dlx1  
Evx2  
Evx2-Hoxd13  
Hoxd13  
Hoxd11  
Hoxd10  
Hoxd9  
Hoxd3  
Neurod1  
chr2:094041897-094041956  
Wt1  
Pax6

**MEF\_specific**

Serpine2  
5033414K04Rik  
Arl4c  
Tmem163  
Myog  
Ptgs2  
Ier5  
chr1:157502737-157502796  
chr1:157502943-157502998  
chr1:157505961-157506012  
chr1:157506478-157506537  
chr1:157506658-157506717  
F11r  
Fbxo28  
Nsl1  
Vim  
Stam  
Barhl1  
Ggta1  
Lrp1b  
Rbm43  
Rprm  
Cobll1  
B230120H23Rik  
Sp9  
Wipf1  
chr2:073576927-073576986  
chr2:073577039-073577097  
chr2:073577168-073577227  
chr2:073577295-073577354  
chr2:073577538-073577597  
Slc39a13  
Depdc7  
Kcna4  
Thbs1  
Ovol2  
Rin2  
Id1  
Blcap  
Slc32a1  
Sall4  
Pfdn4  
Stx16  
chr3:017982804-017982848  
chr3:017983153-017983207  
chr3:017983337-017983396  
chr3:017983528-017983584  
chr3:017986284-017986343  
chr3:017986699-017986744  
Sox2  
Spry1  
Shox2  
1110032E23Rik  
Mcl1  
Csf1  
Ddit4l  
Wdr32

**mES\_specific**

Mybl1  
Tmem70  
Tmem14a  
Ptp4a1  
chr1:034622340-034622399  
Cnga3  
6330578E17Rik  
Npas2  
Rpl31  
Tbc1d8  
Slc9a2  
Ppil3  
Nrp2  
Igfbp5  
Tmbim1  
Plcd4  
Cdk5r2  
Fev  
Cryba2  
Ihh  
Nhej1  
Sgpp2  
B3gnt7  
chr1:088258400-088258450  
chr1:088258598-088258642  
Ecel1  
Efh1  
Ugt1a6b  
Rab17  
Twist2  
Olfr1410  
Bcl2  
C1ql2  
En1  
Cxcr4  
Ptprv  
Arl8a  
Pkp1  
Rgl1  
chr1:157502233-157502280  
chr1:157502439-157502494  
chr1:157503134-157503184  
chr1:157503249-157503299  
chr1:157503513-157503557  
chr1:157503819-157503869  
chr1:157503974-157504029  
chr1:157504454-157504498  
chr1:157504566-157504610  
chr1:157504725-157504769  
chr1:157505169-157505213  
chr1:157505315-157505359  
chr1:157505624-157505682  
Qsox1  
9430070O13Rik  
chr1:161878077-161878134  
chr1:161878192-161878236  
Fmo3

|                          |                          |                          |
|--------------------------|--------------------------|--------------------------|
| Mrg1                     | Tbc1d2                   | Prrx1                    |
| Gabpb1                   | Elavl2                   | Selp                     |
| Ncaph                    | Ssbp3                    | Rgs5                     |
| Insm1                    | Podn                     | Pvrl4                    |
| Nkx2-4                   | Zswim5                   | Pld5                     |
| Nkx2-2                   | Ddefl1                   | D230039L06Rik            |
| Pax1                     | Tcea3                    | Itpkb                    |
| Foxa2                    | Spsb1                    | Atf3                     |
| Abhd12                   | Ski                      | Il15ra                   |
| 5430432M24Rik            | Ptpn12                   | 2810030E01Rik            |
| Dusp15                   | Reln                     | 2810030E01Rik-MlIt10     |
| Dusp15-Ttll9             | Fosl2                    | Commd3                   |
| Scand1                   | Rpl9                     | Ptf1a                    |
| Dhx35                    | Rpl9-Lias                | chr2:020885562-020885621 |
| Mafb                     | Apbb2                    | Nrarp                    |
| Jph2                     | Gabra2                   | Gm996                    |
| Sulf2                    | Sgcb                     | Lcn5                     |
| Cyp24a1                  | Gsh2                     | Notch1                   |
| Tcfap2c                  | Ereg                     | 1110002H13Rik            |
| BC066135                 | Rchy1                    | Olfm1                    |
| Gata5                    | Oas1f                    | 1700007K13Rik-Mrps2      |
| chr2:180822962-180823017 | chr5:125679842-125679892 | Ttf1                     |
| chr2:180823092-180823136 | Serpine1                 | Ass1                     |
| chr3:017982601-017982649 | Actb                     | Fibcd1                   |
| chr3:017987277-017987336 | Nptx2                    | 9130404D14Rik            |
| Bhlhb5                   | 6332401O19Rik            | Rabgap1                  |
| Zmat3                    | chr6:030122380-030122439 | Psemb7                   |
| Pcdh10                   | chr6:030122567-030122620 | Zeb2                     |
| Mab21l1                  | Exoc4                    | Kcnj3                    |
| Rap2b                    | Igf2bp3                  | Nr4a2                    |
| Slc33a1                  | Frmd4b                   | Figf                     |
| Shox2-Rsrc1              | A930037G23Rik            | Stk39                    |
| Fbxw7                    | Ntf3                     | Dlx2                     |
| Mab21l2                  | Cox6b2                   | Hoxd12                   |
| chr3:088300938-088300982 | Ppp1r13l                 | Hoxd4                    |
| chr3:088301128-088301172 | Hnrpul1                  | Prdx6-rs1                |
| chr3:088301348-088301392 | Slc6a5                   | Frzb                     |
| chr3:088301586-088301633 | Bnc1                     | Olf1259                  |
| Zbtb7b                   | Galntl4                  | Dgkz                     |
| Slc27a3                  | Hmx2                     | Alx4                     |
| Tbx15                    | Ctsd                     | chr2:094041748-094041807 |
| Nhlh2                    | Sox1                     | chr2:094042213-094042262 |
| 6530418L21Rik            | 1810029B16Rik            | chr2:094042344-094042388 |
| Alx3                     | Junb                     | chr2:094042503-094042547 |
| Psrc1                    | Sall1                    | chr2:094044723-094044777 |
| Dpyd                     | Cbfb                     | Prrg4                    |
| Neurog2                  | Klhdc4                   | Olf1301                  |
| Pitx2                    | Barx2                    | Grem1                    |
| Lef1                     | chr9:041332894-041332953 | Bahd1                    |
| Cxxc4                    | chr9:041333014-041333064 | Rad51                    |
| Cyr61                    | chr9:041333392-041333445 | Dll4                     |
| Lhx8                     | chr9:041334361-041334420 | Mapkbp1                  |
| Nsmaf                    | chr9:041334630-041334689 | Cep27                    |
| Gdf6                     | chr9:041334796-041334855 | Ckmt1                    |
| Trp53inp1                | chr9:041335020-041335078 | Sord                     |
| Rbm35a                   | Chrna5                   | Duox2                    |
| Pou3f2                   | Pml                      | Fbn1                     |
| Pax5                     | Uchl4                    | 2010106G01Rik            |
| Foxe1                    | chr9:074635534-074635578 | Dusp2                    |

|               |                           |                          |
|---------------|---------------------------|--------------------------|
| Trim32        | chr9:074636619-074636678  | Astl                     |
| Foxd3         | chr9:074637233-074637280  | Adra2b                   |
| Cdkn2c        | Hcrtr2                    | Chchd5                   |
| Dmrta2        | Amotl2                    | Sirpa                    |
| Foxd2         | Dock3                     | 4933425O20Rik            |
| Foxe3         | Pdcd6ip                   | A930025D01Rik            |
| Tal1          | Crtap                     | Avp                      |
| Dmbx1         | Ccr9                      | Gfra4                    |
| 4931406I20Rik | Xtrp3s1                   | Bmp2                     |
| Pou3f1        | Perp                      | 2900006F19Rik            |
| Tcfap2e       | Ctgf                      | Dstn                     |
| Adc           | Popdc3                    | Thbd                     |
| Sesn2         | Lin28b                    | Angpt4                   |
| Grhl3         | Gja1                      | Rbck1                    |
| Id3           | Gm237                     | Pdrg1                    |
| Capzb         | Ank3                      | Epb4.1l1                 |
| Pax7          | Pcnt-2610028H24Rik        | Rbpjl                    |
| Klhdc7a       | Ndufs7                    | Sdc4                     |
| Lzic          | 8030451F13Rik             | Pltp                     |
| Dffb          | Tmtc3                     | Cdh22                    |
| Trp73-Wdr8    | Lgr5                      | Prkcbp1                  |
| Prdm16        | Egfr                      | Nfatc2                   |
| En2           | Irgm                      | Pck1                     |
| Hlxb9         | Wnt9a                     | Gnas                     |
| Slc30a3       | 0610010K14Rik             | Hrh3-Osbpl2              |
| Hmx1          | Ccl2                      | Dido1                    |
| Cpz           | Aatf                      | Bhlhb4                   |
| Msx1          | chr11:086398298-086398357 | chr2:180823231-180823275 |
| Bapx1         | chr11:086398880-086398938 | chr2:180823343-180823387 |
| Dhx15         | chr11:086399346-086399401 | chr2:180823504-180823548 |
| Pcdh7         | chr11:086399501-086399560 | Sox18                    |
| BC013481      | chr11:086399687-086399746 | chr3:017985666-017985725 |
| Phox2b        | chr11:086399920-086399979 | chr3:017985778-017985827 |
| D830007B15Rik | chr11:086400416-086400468 | chr3:017985923-017985967 |
| Rest          | chr11:086401197-086401250 | chr3:017987448-017987507 |
| Prdm8         | chr11:086401318-086401377 | chr3:017987621-017987671 |
| Fgf5          | chr11:086401436-086401480 | chr3:017987762-017987821 |
| Nkx6-1        | chr11:086401551-086401610 | chr3:017988001-017988060 |
| Barhl2        | chr11:086401693-086401751 | Pde7a                    |
| Gfi1          | chr11:086401983-086402037 | Pcdh18                   |
| Pcgf3         | chr11:086402171-086402228 | Ndufc1-Narg1             |
| Ulk1          | chr11:086402458-086402517 | Serpini2                 |
| Svop          | chr11:086402811-086402870 | 6330505N24Rik            |
| 4930519G04Rik | chr11:086403000-086403047 | Bcan                     |
| Tbx5          | chr11:086403185-086403244 | chr3:088300563-088300607 |
| Lhx5          | Igf2bp1                   | chr3:088300775-088300826 |
| Fzd10         | Hoxb13                    | chr3:088301712-088301756 |
| Rabgef1       | Socs3                     | chr3:088301874-088301918 |
| Tmem142b      | Actg1                     | chr3:088302005-088302053 |
| Mcm7          | Coch                      | chr3:088302124-088302183 |
| Uncx4.1       | Gpr135                    | Smcp                     |
| Zfp469        | Actn1                     | Them5                    |
| Gsh1          | 6430527G18Rik             | Hormad1                  |
| Pdx1          | Crip2                     | Hist2h4                  |
| Cdx2          | Hist1h1b                  | Casq2                    |
| Ubl3          | Prss16                    | Kcna3                    |
| Dlx5          | Hist1h4d                  | Kcnc4                    |
| Npy           | Ninj1                     | Ntng1                    |
| Hoxa2         | Edg3                      | Gpr88                    |

|                    |                           |                          |
|--------------------|---------------------------|--------------------------|
| Hoxa9              | Gadd45g                   | Dkk2                     |
| Hoxa10             | chr13:084211055-084211113 | Unc5c                    |
| Hoxa11             | chr13:084211224-084211283 | Clca5                    |
| Hoxa13             | chr13:084211640-084211699 | Negr1                    |
| Evx1               | chr13:084211752-084211811 | Ptger3                   |
| Dok1               | chr13:084211939-084211984 | Tox                      |
| Tlx2               | chr13:084212036-084212095 | Epha7                    |
| Tlx2-Pcgf1         | chr13:084212193-084212252 | Cnr1                     |
| Emx1               | chr13:084212307-084212366 | Olfr155                  |
| Gata2              | chr13:084212497-084212556 | Rnf38                    |
| Tmem43             | chr13:084212629-084212688 | Tgfr1                    |
| Alox5              | chr13:084212752-084212811 | Rad23b                   |
| Zfp248             | chr13:084213712-084213765 | Slc31a2                  |
| Kcna1              | chr13:084213846-084213905 | Whrn                     |
| Aebp2              | chr13:084214021-084214073 | Tnc                      |
| Bbc3               | Scamp1                    | Pappa                    |
| BC057627           | Polk-Col4a3bp             | Astn2                    |
| Prkd2              | Snag1                     | Mllt3                    |
| Rps19              | Plau                      | Nfia                     |
| Axl                | Gja3                      | Cachd1                   |
| Cebpa              | chr14:063540318-063540377 | Pars2                    |
| Zfp536             | chr14:063540522-063540581 | Cdkn2c-Faf1              |
| Cpt1c              | chr14:063540635-063540686 | 4833401D15Rik            |
| Bax                | chr14:063541880-063541927 | Cdc20                    |
| Dbx1               | chr14:063542134-063542188 | 4930538K18Rik            |
| Det1               | chr14:063542568-063542617 | Mfsd2                    |
| 4632434I11Rik      | chr14:063542741-063542785 | Hmgb4                    |
| 4632434I11Rik-Prpc | chr14:063542846-063542901 | Sync                     |
| Tsku               | chr14:063543201-063543248 | 2410081M15Rik            |
| Olfr543            | chr14:063543425-063543481 | Marcks1                  |
| Gtf3c1             | chr14:063543579-063543636 | chr4:129322971-129323015 |
| Hmx3               | chr14:063544045-063544089 | Matn1                    |
| Mgmt               | chr14:063544167-063544211 | Ptpru                    |
| Ebf3               | Slitrk1                   | Zfp593                   |
| Txn12              | Mrpl13-Mtbp               | Tmem57-Rhd               |
| Nkx6-2             | Plec1                     | Fuca1                    |
| Adam8              | Myh9                      | 1700013G24Rik            |
| Msx3               | Zfp385                    | Nbl1                     |
| Bet1l              | C530044N13Rik             | Aldh4a1                  |
| Lrdd               | Hes1                      | Igsf21                   |
| Igf2               | BC022623                  | Slc45a1                  |
| R74862             | Phldb2                    | Tas1r1                   |
| Fgf15              | Ripk4                     | Trp73                    |
| Efnb2              | Dusp1                     | Tnfrsf18                 |
| EG434280           | Slc39a7                   | Ttll10                   |
| Ckap2-Vps36        | Ddr1                      | 5830415L20Rik            |
| Stox2              | Ier3                      | Fzd1                     |
| Aga                | Lbh                       | Abcb1b                   |
| Hand2              | Pigf                      | Gnai1                    |
| Klhl26             | Egr1                      | Nupl2                    |
| Pou4f2             | Pura                      | Atg9b                    |
| Fbxw9              | Gnal                      | Atg9b-Abcb8              |
| Man2b1             | Tubb6                     | Gbx1                     |
| Cbln1              | Smad7                     | Shh                      |
| Irx3               | Pard6g                    | Mapre3                   |
| Irx5               | AI837181                  | Trim54                   |
| Mmp2               | Rnaseh2c                  | Spon2                    |
| Gse1               | Slc3a2                    | Fgfr3                    |
| Foxf1a             | Gldc                      | Rnf4                     |

Mthfsd-Foxc2  
Foxc2  
Foxl1  
Disc1  
Tbx20  
Acad8-Thyn1  
Thyn1  
Hnt  
Snx19  
Scn3b  
Bsx  
chr9:041335133-041335192  
Scn4b  
Ankk1  
4833427G06Rik  
4833427G06Rik-Btg4  
Isl2  
Lbxcor1  
Csnk1g1  
Rps27l  
Tpm1  
Foxb1  
chr9:074636179-074636223  
chr9:074636346-074636399  
chr9:074636467-074636526  
chr9:074636750-074636809  
chr9:074636981-074637037  
chr9:074637100-074637159  
Onecut1  
Leo1  
Col12a1  
Irak1bp1  
Tbx18  
Rasgrf1  
Zic1  
Zic1-Zic4  
Foxl2  
Hyal1  
Ccr4  
Eomes  
Acaa1b  
Kif15  
Olig3  
Tcf21  
Eya4  
Foxo3a  
Nr2e1  
Sim1  
Vgl12  
Ddit4  
Ctnna3  
Zfp365  
Col18a1  
Cdc34  
Rfx4  
Ntn4  
Cart1  
Kcnc2  
Mdm2

Pten  
5-Mar  
Hhex  
Zic3  
0610008C08Rik  
Gm784  
Rai2  
Sry

Acox3  
Psap1  
Cpeb2  
Cd38  
Slit2  
2310045A20Rik  
Tbc1d1  
Kctd8  
Pdgfra  
Lphn3  
Epha5  
Gc  
Cxcl1  
Art3  
Ccn1  
Antxr2  
Prkg2  
Lin54  
Hpse  
A230097K15Rik  
Mepe  
Tgfbr3  
Sez6l  
BC057022  
Cc dc60  
Hrk  
Brap  
Tect1  
1500011H22Rik  
Atpbd1c  
P2rx7  
Diablo  
Vps33a  
Ran  
Sfrs8  
Wbscr17  
Rhbdd2  
Vgf  
Pdgfa  
C130050018Rik  
A930017N06Rik  
Tmem130-Trrap  
Flt1  
Pon2  
chr6:013822185-013822244  
Met  
Wnt2  
Cttnbp2  
Wnt16  
Gpr37  
Cpa1  
Tsga13  
Podxl  
2310005E10Rik  
Zfp467  
Hoxa1  
chr6:052106690-052106743  
chr6:052106853-052106900  
chr6:052107009-052107053

Hmga2  
Lrig3  
Slc35e4  
Lif  
Vstm2  
Otx1  
Tlx3  
Nudcd2  
Ccng1  
Canx  
Hand1  
Trim11  
A230051G13Rik  
Wnt3a  
Vamp2  
Traf4  
Nek8  
Tcf2  
Lhx1  
Tbx2  
Tbx4  
Dlx4  
B4galnt2  
Hoxb9  
Hoxb6  
Hoxb4  
Hoxb3  
Scrn2  
Cacnb1-Rpl19  
Neurod2  
Ikzf3  
Rara  
Etv4  
3000004C01Rik  
Wnt3  
Prkar1a  
Unk  
Birc5  
Cbx4  
Zfp750  
Lpin1  
Pqlc3  
Hpcal1  
Rrm2  
Foxg1  
Npas3  
Titf1  
Pax9  
Foxa1  
Six6  
Six1  
Tmem30b  
Hspa2  
Zfp36l1  
4933426M11Rik  
Chx10  
Fos  
Tshr  
9030617O03Rik

Hoxa5  
Hoxa6  
Gars  
AW146242  
A930038C07Rik  
Tacstd2  
Thns12  
Fabp1  
Atoh8  
Usp39-Tmem150  
Tmem150  
Mat2a  
Lrrtm1  
Mrpl19  
Vax2  
AB041550  
Prok2  
Rybp  
Pdzn3  
Chl1  
Grm7  
1500001M20Rik  
Plxnd1  
Cxcl12  
Bid  
Mical3  
Leprel2  
Ccnd2  
H2afj  
Eps8  
Bhlhb3  
Stk38l  
Pthlh  
Rps5  
Grif1  
Dmpk  
Tomm40  
1500002O20Rik  
Zfp566-Zfp260  
Etv2  
Gapdhs  
Wtip  
Chst8  
2900093B09Rik  
Il4i1  
Prmt1  
Grwd1  
Abcc6-Nomo1  
Nell1  
Gabra5  
Atp10a  
Dmn  
Arrdc4  
Nr2f2  
A830073O21Rik  
St8sia2  
Ntrk3  
Isg20l1  
Furin

Gsc  
4831426119Rik  
Siva1  
Sp8  
Foxq1  
Foxf2  
Foxc1  
1300014106Rik  
Nrn1  
Tcfap2a  
Barx1  
Shc3  
Msx2  
Pitx1  
Neurog1  
Irx1  
Irx2  
Slc12a7  
Nr2f1  
Otp  
Polk  
Enc1  
Foxd1  
Ocln  
Plk2  
Fst  
Isl1  
Fezf2  
Thrb  
Zfp503  
Zmiz1  
Mmrn2  
Otx2  
Efs-Il25  
Cideb-Ltb4r2  
Cma1  
Fgf9  
Gata4  
Ebf2  
Nkx2-6  
Tnfrsf10b  
P2ry5  
Ccdc122  
Dach1  
Pou4f1  
Sox21  
Zic5-Zic2  
Zic2  
Osr2  
Grhl2  
Mafa  
Kcnj4  
Pmm1  
Gtse1  
Cacnb3  
C1ql4-2810451A06Rik  
Krt5  
Aaas  
Sp1

Iqgap1  
Odz4  
Phca  
Wnt11  
Neu3  
Adm  
chr7:112161405-112161464  
chr7:112161620-112161679  
chr7:112161798-112161857  
4632411J06Rik  
Spon1  
Tmc7  
6330503K22Rik  
Eef2k  
Ndufab1  
Prkcb1  
Slc5a11  
Sbk1  
Sh2b1  
Tbc1d10b  
Vkorc1  
Itgax  
Rgs10  
Tacc2  
Htra1  
4631426J05Rik  
Nkx1-2  
A930008G19Rik  
E430002D04Rik  
Sirt3  
Cox8b  
Ifitm3  
Slc25a22  
Lrdd-Rplp2  
Ascl2  
Cdkn1c  
Phlda2  
Fgf3  
Col4a1  
Col4a1-Col4a2  
Col4a2  
Rab20  
Csmd1  
Ckap2  
Sfrp1  
Gpr124  
Adrb3  
Eif4ebp1  
Unc5d  
Helt  
Irf2  
Tll1  
Atp13a1  
Tmem59l-Crlf1  
Crif1  
5430437P03Rik  
Pgls  
Unc13a-Jak3  
Gab1

Hoxc13  
Hoxc12  
Hoxc11  
Hoxc10  
Hoxc9  
Hoxc8  
Carhsp1  
P2rxl1  
Dvl3  
Ccdc58  
Adprh-Cd80  
Cd80  
Olig2  
Sim2  
Pde10a  
Ccnf  
Gfer  
Hs3st6  
Nkx2-5  
Scube3  
Def6  
Cdkn1a  
Hspa1b  
chr17:039452641-039452685  
chr17:039452761-039452805  
chr17:039452885-039452929  
chr17:039453294-039453338  
chr17:039453545-039453589  
chr17:039453656-039453700  
chr17:039453964-039454008  
chr17:039454224-039454268  
chr17:039454621-039454665  
chr17:039456527-039456571  
chr17:039456689-039456733  
chr17:039456838-039456882  
Six3  
Six2  
Msh6  
Gata6  
Nol4  
Pou4f3  
Prdm6  
Adrb2  
Onecut2  
Rax  
Pmaip1  
Sall3  
Zadh2  
Cbln2  
Rhod  
Rin1  
Fosl1  
Esrra  
Foxb2  
Foxd4  
Dmrt1  
Dmrt3  
Dmrt2  
Fas

Trmt1  
Calr  
chr8:089749120-089749170  
chr8:089749266-089749325  
chr8:089749651-089749710  
9130017C17Rik  
Chd9  
Irx6  
Pllp  
Cdh8  
Cdh11  
Car7  
Ces5  
Fbxl8  
Hsf4  
Fhod1  
Nutf2  
Slc12a4  
Sntb2  
Nqo1  
Aprt  
Cpne7  
Mmp20  
Pgr  
Fut4  
Folr4  
Olfr870  
Olfr871  
Olfr872  
Olfr39  
Olfr873  
Zfp426  
2210010B09Rik  
5730577I03Rik  
Fbxl12  
Fbxl12-Ubl5  
Ubl5  
Pin1  
Col5a3  
Col5a3-Rdh8  
A230050P20Rik  
Angptl6  
Angptl6-Ppan  
Ppan  
Dnmt1  
Edg5  
Mrpl4  
Icam1  
Icam4  
Icam5  
B230118G17Rik  
Raver1  
Cdc37  
Pde4a  
Keap1  
Edg8  
Atg4d  
Cdkn2d  
Ap1m2



Cyp26a1  
Nkx2-3  
Pax2  
Tlx1  
Lbx1  
Vax1  
Emx2  
Sox3  
Arx  
Eda2r  
Esx1  
Ddx3y

Ilf3  
Qtrt1  
Dnm2  
Tmed1  
AB124611  
Carm1  
Yipf2  
1810026J23Rik  
Ldlr  
Spc24  
Ankrd25  
EG624219  
Dock6  
Rab3d  
2510048L02Rik  
BC018242  
Epor  
Rgl3  
C330001K17Rik  
Prkcsh  
Elavl3  
Zfp653  
Ecsit  
Cnn1  
Pigyl  
Zfp809  
BC050092  
Anln  
9530077C05Rik  
rp9  
rp9-Bbs9  
Bmper  
Npsr1  
Dpy19l1  
Cyp4  
Herpud2  
7-Sep  
2310005P05Rik  
B3gat1  
BC038479  
Acad8  
Vps26b  
Vps26b-Ncapd3  
Ncapd3  
Jam3  
Spata19  
Opcml  
Fli1  
Ei24  
Pknox2  
Slc37a2  
9030425E11Rik  
Zbtb16  
4930550C14Rik  
Crabp1  
Islr2  
Arih1  
Smad6  
Zwilch

Megf11  
Fbxl22  
Rora  
E330016A19Rik  
E330016A19Rik-Mto1  
Htr1b  
Tpbp  
Zic4  
Plod2  
Chst2  
Il20rb  
Ephb1  
Abhd14a  
Mapkap3  
Rnf123-Mst1  
Usp4  
4933406E20Rik  
Dhx30  
Pthr1  
Tessp2  
Slc22a14  
chr9:119171949-119172008  
Gpr126  
Slc35d3  
Myb  
Enpp1  
Rspo3  
Sobp  
Sh3md4  
Cdh23  
Unc5b  
Nodal  
Col13a1  
Egr2  
Al646023  
EG333669  
Ftcd  
Pwp2  
Palm  
Wdr18  
Dos  
Atp5d  
6330514A18Rik  
Tcfe2a  
Onecut3  
Tbxa2r  
Nfic  
Gna15  
Ascl1  
Apaf1  
Slc25a3  
Tmpt  
Cradd  
E2f7  
Trhde  
Rab21  
Avpr1a  
Al851790  
Nxph4

Baz2a  
Spryd4  
Pa2g4  
Dgka  
Sec14l3  
Tbc1d10a  
Vwc2  
Grb10  
Meis1  
Rab1  
Bcl11a  
Stc2  
Gabra1  
Ebf1  
Ankrd43  
Gpx3  
Srebf1  
Hs3st3b1  
Gm879  
Ntn1  
Gucy2e  
Wdr79  
Sox15  
Kctd11  
Slc2a4  
Med11  
Chrne  
Kif1c  
Wscd1  
Garnl4  
Hic1  
Dph1-Rtn4rl1  
Rtn4rl1  
Rph3al  
A830053O21Rik  
Tmem132e  
Ppm1d  
Nog  
Car10  
Dlx3  
5730593F17Rik  
chr11:095515010-095515061  
chr11:095515144-095515194  
chr11:095515248-095515302  
chr11:095515388-095515433  
Hoxb5  
Hoxb1  
Npepps  
Mllt6  
Lasp1  
Ikzf3-Zbp2  
Casc3  
Krtap3-2  
Krt35  
Krt15  
Hsd17b1  
Plekhh3  
Fzd2  
C1ql1

Plcd3  
Rprml  
Crhr1  
chr11:104284770-104284815  
chr11:104285007-104285051  
Ccdc44  
Pitpnc1  
Gna13  
Sox9  
Cd300a  
Sap30bp  
Itgb4  
Trim47  
Evpl  
Sphk1  
Rhbf2  
Jmjd6  
chr11:117298860-117298904  
Tmc8  
D11Bwg0517e  
Cbx8  
Nptx1  
chr11:119996326-119996372  
BC003940  
Sirt7  
Dcxr  
Gdf7  
Laptm4a  
Wdr35  
Osr1  
AW125753  
Trib2  
Id2  
Rnf144  
Sox11  
Twist1  
Nkx2-9  
Slc25a21  
Sstr1  
Lrfn5  
Mdga2  
Six4  
Sgpp1  
Tex21-Mthfd1  
Plek2  
Arg2  
Map3k9  
Rgs6  
Dpf3  
Ltbp2  
Ylpm1  
Flrt2  
Kcnk13  
Gpr68  
Serpina3n  
2410024A21Rik  
Bcl11b  
Wars  
Dlk1

Dio3  
Gm266  
Chrm3  
Irf4  
Bmp6  
Slc35b3  
Gcnt2  
Pak1ip1  
Atxn1  
Ibrdc2  
Id4  
Ogn  
Nfil3  
4732471D19Rik  
Ntrk2  
Dapk1  
Irx4  
Ssbp2  
Hmgcr  
Rgs7bp  
Htr1a  
chr13:114153219-114153270  
Parp8  
Fgf10  
chr14:018873695-018873739  
Dnajc9  
Ppp3cb  
Asb14  
Il17rd  
Wnt5a  
Lrtm1  
Cacna2d3  
Mettl6  
Slc18a3  
Mapk8  
Anxa8  
3110001K24Rik  
Grid1  
Bmp4  
Fbxo34  
Supt16h  
Sall2  
Abhd4  
Slc7a7  
Tgm1  
Lats2  
Sox7  
Msra  
Nefl  
Nefm  
Egr3  
Gfra2  
Pcdh8  
Pcdh17  
Kctd12  
Trim52  
Slitrk5  
Gpc6  
Dzip1

Ptger4  
Gdnf  
Bxdc2  
Npr3  
5730557B15Rik  
Zfpm2  
Col14a1  
Sntb1  
Zhx2  
8230402K04Rik  
chr15:060653691-060653743  
chr15:060653801-060653845  
chr15:060654616-060654661  
Adcy8  
St3gal1  
Kcnk9  
Eif2c2  
Bai1  
Zfp41  
Grina  
Spatc1  
Bop1  
Adck5  
Gpt1  
Recql4  
Rabl4  
Sh3bp1  
Tef  
3110043J09Rik  
3110048E14Rik  
Wnt7b  
Nell2  
Slc38a2  
Col2a1  
Wnt10b  
Wnt1  
Dhh  
2810451A06Rik  
Acvr1b  
Krt84  
Krt18  
Hoxc6  
Hoxc5  
Grin2a  
Nubp1  
Smpd4  
Scarf2  
Car15  
Gnb1l  
Tbx1  
Lamp3  
Yeats2  
Igf2bp2  
Fgf12  
Slc12a8  
Ropn1  
Mylk  
2310056P07Rik-Ccdc58  
Gtf2e1

Sidt1  
Alcam  
Adamts5  
Olig1  
Runx1  
Cbr3  
Brwd1  
Mx1  
chr17:003283612-003283656  
Agpat4  
Acat2  
Hcfc1r1  
Kremen2  
Hn1l  
Cacna1h  
BC052484  
Rhbd1l  
Nme4  
Ppard  
Glp1r  
Tff3  
Akap8l  
Ankrd47  
Brd2  
Tap1  
H2-Ab1  
H2-Eb1  
AU023871  
chr17:039452112-039452156  
chr17:039453405-039453449  
Tdrd6  
Capn11  
Tmem63b  
Ptk7  
Trerf1  
Satb1  
Sema6b  
Ptpns  
Znrf4  
Clpp  
EfnA5  
Arhgap28  
Cyp1b1  
Tmem178  
Kcnk12  
Map3k8  
Mkx  
Fzd8  
Colec12  
Zfp521  
Cdh2  
C230097124Rik-Zfp35  
Bin1  
Wnt8a  
Cdc23  
2010001M09Rik  
Pcdhac2  
Pcdhga8  
Pcdhga9

Pcdhgb6  
Pcdhga10  
Pcdhgb7  
Pcdhga11  
Pcdhgb8  
Pcdh1  
Sema6a  
Lox  
Zfp608  
Fbn2  
Adamts19  
Rps14  
Txnl1  
Atp8b1  
Ccbe1  
Lipg  
Nfatc1  
Tshz1  
Tshz1-Zadh2  
B230399E16Rik  
Neto1  
BC021614  
Clcf1  
Brms1  
Ovol1  
Ovol1-Gm962  
Sac3d1  
1810013C15Rik  
Dagla  
Stx3  
Smarca2  
Vldlr  
Prkg1  
Pdlim1  
Sorbs1  
Dntt  
Ubtd1  
Avpi1  
Sfrp5  
Pkd2l1  
Wnt8b  
Lzts2  
Pdzd7  
Fgf8  
Kcnip2  
2810048G17Rik  
Sorcs3  
Adra2a  
Adrb1  
Gfra1  
Nanos1  
Usp27x  
Bcor  
Usp9x  
Chst7  
Lonrf3  
Zbtb33  
6430550H21Rik  
Gria3



Hs6st2  
Hprt1  
chrX:049302214-049302260  
chrX:049302418-049302477  
chrX:049303422-049303471  
chrX:049303557-049303609  
chrX:049303667-049303726  
chrX:049303867-049303926  
Gpr50  
Magea9  
Ar  
Cited1  
Fgf16  
Pou3f4  
Irs4  
Asb11  
Mospd2  
Mospd2-Fancb  
Fancb  
Glra2  
Gemin8  
Gpm6b  
Ofd1  
Ofd1-Trappc2  
Rab9  
A630018P17Rik  
Egfl6  
Tmsb4x  
Tlr8  
Prps2  
Msl31  
Amelx  
Hccs  
Mid1  
Zfy1  
Ube1y1  
Jarid1d  
Uty  
Sry  
Rbmy1a1

**Supplementary Table 5**

| <b>Primer Name</b>       | <b>Primer Sequence (From 5' to 3')</b>                                |
|--------------------------|-----------------------------------------------------------------------|
| Fwd_Rap2b(m)_RT01        | CTGCCCCCTTCATGGAGACA                                                  |
| Rev_Rap2b(m)_RT01        | TGCGAATAGCTCATCCACTGA                                                 |
| Fwd_Rap2b(h)_RT01        | GACGTCGGCCAAAAACAAA                                                   |
| Rev_Rap2b(h)_RT01        | CGCACGATCTCGGCAAAT                                                    |
| Fwd_p21(h)_RT01          | AGCGATGGAACCTCGACTTTG                                                 |
| Rev_p21(h)_RT01          | CGAAGTCACCCTCCAGTGGT                                                  |
| Fwd_p21(m)_RT01          | GGACCACGTGGCCTTGTC                                                    |
| Rev_p21(m)_RT01          | GAATCTTCAGGCCGCTCAGA                                                  |
| Fwd_18srRNA(m)_RT01      | TTCGTATTGCGCCGCTAGA                                                   |
| Rev_18srRNA(m)_RT01      | CTTTCGCTCTGGTCCGTCTT                                                  |
| Fwd_28s(h)_RT01          | GCCGAAGCCAGAGGAAACT                                                   |
| Rev_28s(h)_RT01          | GACGACCGATTTGCACGT                                                    |
| Fwd_28s(m)_RT01          | GTGACGCGCATGAATGGA                                                    |
| Rev_28s(m)_RT01          | TGTGGTTTCGCTGGATAGTAGGT                                               |
| Upper_Rap2b(h)_shRNA01   | CCGGCGGGCTCCTTCATCGAGAAGTCTCGAGACTTCTCG<br>ATGAAGGAGCCCCGTTTTTGGATCCG |
| Bottom_Rap2b(h)_shRNA01  | AATTCGGATCCAAAAACGGGCTCCTTCATCGAGAAGTCT<br>CGAGACTTCTCGATGAAGGAGCCCCG |
| Upper_Rap2b(h)_shRNA03   | CCGGAGACGAGCTATTTGCCGAGATCTCGAGATCTCGGC<br>AAATAGCTCGTCTTTTTTGGATCCG  |
| Bottom_Rap2b(h)_shRNA03  | AATTCGGATCCAAAAAAGACGAGCTATTTGCCGAGATCT<br>CGAGATCTCGGCAAATAGCTCGTCT  |
| Fwd_Rap2b(m)_53RE_ChIP02 | GCCGCAGCCAAGAATCTG                                                    |
| Rev_Rap2b(m)_53RE_ChIP02 | CAGCGGTACTTAGGGCTCCAT                                                 |
| Fwd_Rap2b(m)_53RE_ChIP03 | CCGCTGTGACTTGGAAACCA                                                  |
| Rev_Rap2b(m)_53RE_ChIP03 | AAACGTCCTCACGGAAGGAA                                                  |
| Fwd_Rap2b(m)_53RE_ChIP04 | GGATCTAGAGAGACTCGGGACAAG                                              |
| Rev_Rap2b(m)_53RE_ChIP04 | GGCTCCGCTCAGTTGCA                                                     |
| Fwd_Rap2b(m)_53RE_ChIP05 | AGCGGAGCCAAGTCTTGAGA                                                  |
| Rev_Rap2b(m)_53RE_ChIP05 | GCTTGCTCTTCCCAAAGCT                                                   |
| Fwd_Rap2b(m)_53RE_ChIP06 | AGCACTCCACCTAAATTCCTTCTTT                                             |
| Rev_Rap2b(m)_53RE_ChIP06 | CCCGGGCCTGTGCAT                                                       |
| Fwd_Rap2b(m)_53RE_ChIP07 | TGAGCGGAGGCGACTTTG                                                    |
| Rev_Rap2b(m)_53RE_ChIP07 | TTGCTGAGGTTTTGTCGCTTT                                                 |
